# Supplementary material for: Identification of Carboxylesterase Genes Implicated in Temephos Resistance in the Dengue Vector Aedes aegypti
Source: PLoS Negl Trop Dis. 2014 Mar 20;8(3):e2743. doi: 10.1371/journal.pntd.0002743 (PMC3961196; doi:10.1371/journal.pntd.0002743)
Supplement: Table S2 — List of significant transcripts commonly found in “NS 2 Exp vs P” and NS 2 Unexp vs P” comparisons. (XLSX) [file pntd.0002743.s004.xlsx]

## Sheet: Table_S2
Sup. Table 2: List of significant transcripts commonly found in "NS 2 Exp vs P" and NS 2 Unexp vs P" comparisons
		NS2 Exp vs P					NS2 Unexp vs P
SystematicName	Blast2GO description	FC	Regulation	Corrected p-value	P-value		FC	Regulation	Corrected p-value	P-value	Fold change RS/RS	GOs	InterProScan	Vectorbase Description
AAEL001323-RA	protein takeout	111.425	up	0.000320912	3.09177e-05		92.599	up	1.41092e-05	6.42313e-07	1.20331	-	seg (SEG)	conserved hypothetical protein [Source:VB External Description;Acc:AAEL003452]
AAEL008176-RA	metallothionein 1	93.0662	up	0.000323407	3.21904e-05		65.5257	up	0.000322842	0.000100748	1.4203	C:lipid particle	IPR005511; IPR011042; IPR013658; PTHR10907 (PANTHER), PTHR10907:SF11 (PANTHER), SSF63829 (SUPERFAMILY)	anterior fat body protein [Source:VB External Description;Acc:AAEL001022]
AAEL005112-RA	esterase CCEAE3A	90.9652	up	7.36179e-05	2.30584e-07		68.5196	up	3.41664e-06	2.63316e-08	1.32758	F:cytochrome-c oxidase activity; P:determination of adult lifespan; C:mitochondrial respiratory chain complex IV; F:enzyme regulator activity; C:microsome; C:lipid particle; P:mitochondrial electron transport, cytochrome c to oxygen	IPR001349; seg (SEG), tmhmm (TMHMM)	cytochrome c oxidase, subunit VIA, putative [Source:VB External Description;Acc:AAEL003234]
AAEL002245-RA	hypothetical protein AaeL_AAEL002245 [Aedes aegypti]	59.2445	up	0.000103927	6.87583e-07		56.3105	up	2.25359e-06	6.94746e-09	1.0521	F:hydrolase activity	tmhmm (TMHMM)	epoxide hydrolase [Source:VB External Description;Acc:AAEL006342]
AAEL002542-RA	triosephosphate isomerase	55.1299	up	0.000135787	2.81544e-06		64.9698	up	2.89667e-06	2.0025e-08	0.848546	F:metal ion binding; F:hydrolase activity, acting on carbon-nitrogen (but not peptide) bonds, in linear amidines; P:biological_process	IPR024131; coil (COIL), PF12640 (PFAM), seg (SEG)	Misexpression suppressor of ras, putative [Source:VB External Description;Acc:AAEL006752]
AAEL002202-RA	hypothetical protein AaeL_AAEL002202 [Aedes aegypti]	51.9198	up	0.000170386	5.90771e-06		56.266	up	7.93048e-06	2.14346e-07	0.922755	F:actin binding; P:heart development	IPR000533; G3DSA:1.20.5.340 (GENE3D), PTHR19269 (PANTHER), PTHR19269:SF11 (PANTHER)	tropomyosin invertebrate [Source:VB External Description;Acc:AAEL002759]
AAEL009487-RA	hypothetical protein AaeL_AAEL009487 [Aedes aegypti]	51.2341	up	0.000258792	1.94047e-05		50.8339	up	4.45541e-06	4.93016e-08	1.00787	F:transferase activity, transferring acyl groups other than amino-acyl groups	IPR002656; PTHR11161 (PANTHER)	conserved hypothetical protein [Source:VB External Description;Acc:AAEL014766]
AAEL002243-RA	hypothetical protein AaeL_AAEL002243 [Aedes aegypti]	47.2084	up	0.000135787	2.74774e-06		51.215	up	2.89225e-06	1.90015e-08	0.921767	P:polyamine biosynthetic process; F:catalytic activity	IPR000183; IPR002433; IPR009006; IPR022643; IPR022644; G3DSA:3.20.20.10 (GENE3D), PTHR11482 (PANTHER), PTHR11482:SF4 (PANTHER), SSF51419 (SUPERFAMILY)	ornithine decarboxylase [Source:VB External Description;Acc:AAEL014995]
AAEL002208-RA	hypothetical protein AaeL_AAEL002208 [Aedes aegypti]	44.9988	up	8.15508e-05	4.5961e-07		46.1912	up	2.67845e-06	1.0152e-08	0.974184	F:sequence-specific DNA binding; F:transcription factor activity; C:nucleus; P:regulation of transcription, DNA-dependent	IPR000253; IPR001766; IPR008984; IPR011991; IPR018122; PTHR11829 (PANTHER), PTHR11829:SF50 (PANTHER), SSF46785 (SUPERFAMILY)	hypothetical protein [Source:VB External Description;Acc:AAEL010565]
AAEL002239-RA	hypothetical protein AaeL_AAEL002239 [Aedes aegypti]	44.0154	up	7.36179e-05	2.98114e-07		42.7164	up	2.89225e-06	1.56486e-08	1.03041	-	PTHR20983 (PANTHER)	conserved hypothetical protein [Source:VB External Description;Acc:AAEL012571]
AAEL000323-RA	cysteine-rich venom	42.1626	up	0.000183956	7.75309e-06		29.7312	up	1.23145e-05	4.99424e-07	1.41813	F:binding	IPR000225; IPR011989; IPR016024; PTHR23315 (PANTHER), PTHR23315:SF9 (PANTHER)	armc4 [Source:VB External Description;Acc:AAEL010682]
AAEL002189-RA	cuticular protein 12 from low complexity family (agap008455-pa)	41.4164	up	7.36179e-05	1.70873e-08		41.7915	up	2.87298e-06	1.27286e-08	0.991025	F:heme binding; P:oxidation reduction; F:peroxidase activity; P:response to oxidative stress	IPR002007; IPR010255; IPR019791; coil (COIL), PTHR11475 (PANTHER), PTHR11475:SF31 (PANTHER), seg (SEG), SignalP-NN(euk) (SIGNALP), tmhmm (TMHMM)	double oxidase, two peroxidase domains [Source:VB External Description;Acc:AAEL003933]
AAEL009434-RA	hypothetical protein AaeL_AAEL009434 [Aedes aegypti]	41.0326	up	7.36179e-05	2.43247e-07		33.7395	up	2.46858e-05	2.0385e-06	1.21616	P:ER localization; C:actin filament; P:inter-male aggressive behavior; F:actin binding; P:mitochondrion localization; P:nucleus localization; P:spermatid development; C:extracellular region; C:cytosol; P:phagocytosis, engulfment	IPR007122; IPR007123; G3DSA:3.40.20.10 (GENE3D), PTHR11977:SF11 (PANTHER), SSF55753 (SUPERFAMILY)	gelsolin precursor [Source:VB External Description;Acc:AAEL006102]
AAEL012204-RA	cysteine-rich venom	40.8532	up	0.000121411	1.41314e-06		31.3296	up	6.50042e-06	1.13336e-07	1.30398	P:lipid metabolic process	seg (SEG)	lysosomal acid lipase, putative [Source:VB External Description;Acc:AAEL012341]
AAEL002201-RA	hypothetical protein AaeL_AAEL002201 [Aedes aegypti]	35.9001	up	7.36179e-05	1.41788e-07		35.0475	up	2.17541e-06	2.76471e-09	1.02433	F:phosphomannomutase activity; P:carbohydrate metabolic process; F:magnesium ion binding	IPR005841; IPR005843; IPR005844; IPR005845; IPR005846; IPR016055; IPR016066; G3DSA:3.30.310.50 (GENE3D), PTHR22573 (PANTHER), PTHR22573:SF2 (PANTHER), SSF55957 (SUPERFAMILY)	phosphoglucomutase [Source:VB External Description;Acc:AAEL001480]
AAEL015154-RA	hypothetical protein AaeL_AAEL015154 [Aedes aegypti]	35.2775	up	0.000918106	0.000215747		15.4035	up	0.000736881	0.000289009	2.29023	-	no IPS match	conserved hypothetical protein [Source:VB External Description;Acc:AAEL008176]
AAEL013446-RA	hypothetical protein AaeL_AAEL013446 [Aedes aegypti]	34.9369	up	0.000842198	0.000188107		15.0147	up	0.000799414	0.000320675	2.32685	-	IPR010562; PTHR11008 (PANTHER), PTHR11008:SF9 (PANTHER)	conserved hypothetical protein [Source:VB External Description;Acc:AAEL001323]
AAEL002725-RA	pupal cuticle protein	31.2916	up	0.000417584	5.43852e-05		28.1498	up	2.21533e-05	1.59537e-06	1.11161	F:hydrolase activity	IPR002018; G3DSA:3.40.50.1820 (GENE3D), PTHR11559 (PANTHER), PTHR11559:SF127 (PANTHER), seg (SEG), SSF53474 (SUPERFAMILY)
AAEL015264-RA	alpha-esterase	28.877	up	0.000301821	2.66221e-05		22.1464	up	7.34958e-06	1.37427e-07	1.30392	-	PS51257 (PROFILE)	conserved hypothetical protein [Source:VB External Description;Acc:AAEL000165]
AAEL002218-RA	hypothetical protein AaeL_AAEL002218 [Aedes aegypti]	27.8035	up	0.000127342	1.82546e-06		29.1506	up	2.87298e-06	1.30337e-08	0.953788	-	no IPS match	hypothetical protein [Source:VB External Description;Acc:AAEL005236]
AAEL015304-RA	ester hydrolase c11orf54-like protein	26.9815	up	0.000135787	2.71238e-06		23.9945	up	1.91868e-05	1.15944e-06	1.12449	-	seg (SEG)	conserved hypothetical protein [Source:VB External Description;Acc:AAEL004863]
AAEL010821-RA	60s acidic ribosomal protein p0	26.1746	up	0.000129789	2.23908e-06		29.5165	up	2.06207e-06	1.27029e-09	0.886777	F:calcium ion binding; F:calcium-dependent phospholipid binding	seg (SEG), SignalP-NN(euk) (SIGNALP)	annexin x [Source:VB External Description;Acc:AAEL005407]
AAEL005401-RB	cellular repressor of e1a-stimulated isoform a	24.8993	up	0.000219412	1.19895e-05		27.6636	up	6.46509e-06	1.11904e-07	0.900072	F:structural constituent of cuticle	IPR000618; PTHR10380 (PANTHER), PTHR10380:SF41 (PANTHER)	conserved hypothetical protein [Source:VB External Description;Acc:AAEL015460]
AAEL010263-RA	isoform a	24.7964	up	0.000203732	9.7746e-06		19.6378	up	6.19581e-06	9.96029e-08	1.26269	F:peptidase activity; C:membrane	IPR003675; PTHR13046 (PANTHER), SignalP-NN(euk) (SIGNALP), tmhmm (TMHMM)	protease U48 caax prenyl protease rce1 [Source:VB External Description;Acc:AAEL014946]
AAEL014606-RA	cytochrome p450 CYP9J7	24.7518	up	0.000112781	9.74358e-07		26.96	up	2.17541e-06	4.59371e-09	0.918095	P:mesoderm development; P:sarcomere organization; F:calcium ion binding; C:troponin complex; P:skeletal muscle thin filament assembly; P:cellular calcium ion homeostasis; P:muscle cell homeostasis; P:mitochondrion organization; F:tropomyosin binding	IPR001978; G3DSA:1.20.5.350 (GENE3D), PTHR11521 (PANTHER)	troponin t, invertebrate [Source:VB External Description;Acc:AAEL002417]
AAEL007473-RA	cytochrome p450 CYP6AH1	24.4784	up	0.000498405	7.62563e-05		17.1388	up	2.40921e-05	1.94134e-06	1.42824	C:cellular_component	IPR003598; IPR003599; IPR007110; IPR013098; IPR013783; PTHR10489 (PANTHER), SSF48726 (SUPERFAMILY)	titin (connectin) [Source:VB External Description;Acc:AAEL005317]
AAEL005428-RA	kda midgut protein	23.8906	up	0.000924666	0.00021845		13.9139	up	2.65168e-05	2.30158e-06	1.71703	-	seg (SEG), SignalP-NN(euk) (SIGNALP), tmhmm (TMHMM)	conserved hypothetical protein [Source:VB External Description;Acc:AAEL002243]
AAEL005102-RA	ester hydrolase c11orf54-like protein	22.1582	up	0.000107618	7.60848e-07		19.8679	up	1.81026e-05	1.03149e-06	1.11528			NOT ON VECTORBASE
AAEL008193-RA	hypothetical protein AaeL_AAEL008193 [Aedes aegypti]	21.7989	up	0.000150019	3.67741e-06		16.7626	up	4.5055e-05	5.6322e-06	1.30045	P:biosynthetic process; C:lipid particle; F:strictosidine synthase activity	seg (SEG), tmhmm (TMHMM)	hemomucin [Source:VB External Description;Acc:AAEL004884]
AAEL013231-RA	hypothetical protein AaeL_AAEL013231 [Aedes aegypti]	21.4028	up	0.000127342	1.8602e-06		12.1537	up	8.54302e-05	1.5546e-05	1.76101	-	SignalP-NN(euk) (SIGNALP)	conserved hypothetical protein [Source:VB External Description;Acc:AAEL002202]
AAEL012357-RB	hemolymph protein	21.1119	up	0.000129789	2.18417e-06		20.8199	up	2.38959e-05	1.90335e-06	1.01403	-	IPR004119; IPR011009; IPR015897; G3DSA:3.90.1200.10 (GENE3D), PTHR11012 (PANTHER)	juvenile hormone-inducible protein, putative [Source:VB External Description;Acc:AAEL014439]
AAEL008436-RA	ohcu decarboxylase	21.0896	up	0.000340672	3.57702e-05		22.6857	up	3.42564e-05	3.55215e-06	0.92964	F:acyltransferase activity	IPR007130	diacylglycerol o-acyltransferase [Source:VB External Description;Acc:AAEL008878]
AAEL002087-RA	2-oxo-4-hydroxy-4-carboxy-5-ureidoimidazoline decarboxylase	20.9993	up	0.000417763	5.44643e-05		22.1077	up	1.99647e-05	1.27885e-06	0.949863	-	no IPS match	hypothetical protein [Source:VB External Description;Acc:AAEL011933]
AAEL003380-RA	cytochrome p450 CYP4H28	20.8827	up	0.000328366	3.3154e-05		10.2575	up	6.39307e-05	9.90321e-06	2.03584	-	seg (SEG), SignalP-NN(euk) (SIGNALP)	hypothetical protein [Source:VB External Description;Acc:AAEL002245]
AAEL005401-RC	cellular repressor of e1a-stimulated isoform a	20.3918	up	0.000266279	2.06511e-05		20.2693	up	2.97666e-06	2.10604e-08	1.00605	F:kinase activity	IPR005055; SignalP-NN(euk) (SIGNALP), tmhmm (TMHMM)	protein serine/threonine kinase, putative [Source:VB External Description;Acc:AAEL005691]
AAEL007458-RA	amino acid transporter	20.277	up	0.000147572	3.50203e-06		11.8571	up	2.3574e-05	1.80865e-06	1.71012	-	seg (SEG), SignalP-NN(euk) (SIGNALP)	conserved hypothetical protein [Source:VB External Description;Acc:AAEL002239]
AAEL004921-RA	endocuticle structural glycoprotein bd-1	19.3655	up	0.000474523	7.04423e-05		16.1626	up	7.29308e-05	1.20707e-05	1.19817	F:receptor activity	IPR002919; G3DSA:2.10.25.10 (GENE3D), PTHR23259 (PANTHER)	cysteine-rich venom protein, putative [Source:VB External Description;Acc:AAEL000374]
AAEL014236-RA	hypothetical protein AaeL_AAEL014236 [Aedes aegypti]	18.669	up	0.000145879	3.378e-06		12.3768	up	8.22949e-06	2.329e-07	1.50839	F:hydrolase activity, acting on ester bonds; C:nucleus; F:zinc ion binding	IPR015021; PTHR13204 (PANTHER), seg (SEG), SSF117856 (SUPERFAMILY)	conserved hypothetical protein [Source:VB External Description;Acc:AAEL005102]
AAEL009129-RA	cytochrome p450 CYP6Z9	18.4376	up	0.000129789	2.11757e-06		17.9301	up	1.82566e-05	1.06823e-06	1.02831	-	no IPS match	conserved hypothetical protein [Source:VB External Description;Acc:AAEL001561]
AAEL005401-RA	cellular repressor of e1a-stimulated isoform a	17.956	up	0.000184853	7.85884e-06		19.9984	up	4.45541e-06	5.00963e-08	0.897873	F:serine-type endopeptidase activity; P:proteolysis	IPR001254; IPR001314; IPR009003; G3DSA:2.40.10.10 (GENE3D), PTHR24262 (PANTHER), PTHR24262:SF174 (PANTHER)	hypothetical protein [Source:VB External Description;Acc:AAEL008589]
AAEL009637-RA	cathepsin b	17.5065	up	0.00111063	0.000289564		17.8557	up	6.48863e-05	1.02206e-05	0.980441	P:positive regulation of receptor internalization; P:positive regulation of synaptogenesis; F:ubiquitin-protein ligase activity; P:protein ubiquitination; F:Notch binding; F:protein domain specific binding; P:axon midline choice point recognition; P:negative regulation of Notch signaling pathway; C:cytoplasm	IPR000008; IPR000569; IPR001202; IPR008973; IPR018029; IPR020477; G3DSA:2.60.40.150 (GENE3D), PTHR11254 (PANTHER), PTHR11254:SF78 (PANTHER)	E3 ubiquitin-protein ligase nedd-4 [Source:VB External Description;Acc:AAEL002536]
AAEL002860-RA	brain protein 44-like protein	17.3596	up	0.00313945	0.00128471		13.3227	up	0.000309582	9.53975e-05	1.30301	P:proteolysis; F:serine-type endopeptidase activity	IPR000859; IPR001254; IPR001314; IPR009003; IPR018114; G3DSA:2.40.10.10 (GENE3D), PTHR24265 (PANTHER), PTHR24265:SF196 (PANTHER)	trypsin, putative [Source:VB External Description;Acc:AAEL006700]
AAEL010163-RA	hypothetical protein AaeL_AAEL010163 [Aedes aegypti]	17.2725	up	0.00156004	0.000482615		16.0771	up	0.000121285	2.61949e-05	1.07435	-	IPR010562; PTHR11008 (PANTHER), PTHR11008:SF9 (PANTHER)	conserved hypothetical protein [Source:VB External Description;Acc:AAEL013327]
AAEL014742-RA	ankyrin unc44	17.1959	up	0.000216928	1.15082e-05		11.5016	up	9.06781e-05	1.70358e-05	1.49508	-	no IPS match	hypothetical protein [Source:VB External Description;Acc:AAEL013231]
AAEL005317-RB	isoform a	16.8758	up	7.36179e-05	1.90697e-07		11.2282	up	3.2476e-05	3.23682e-06	1.50298	F:structural constituent of cuticle	IPR000618; PTHR10380 (PANTHER), PTHR10380:SF57 (PANTHER)	hypothetical protein [Source:VB External Description;Acc:AAEL008193]
AAEL009783-RA	cuticle	16.2368	up	0.00938688	0.00505341		10.8834	up	0.00163619	0.000766516	1.49188	-	IPR009832	conserved hypothetical protein [Source:VB External Description;Acc:AAEL012357]
AAEL001022-RB	anterior fat body protein	16.186	up	0.000325836	3.27014e-05		16.3448	up	1.16661e-05	4.53968e-07	0.990284	F:protein binding	no IPS match	hypothetical protein [Source:VB External Description;Acc:AAEL007407]
AAEL010682-RA	armadillo repeat-containing protein 4	15.8739	up	0.00297622	0.00119		9.3309	up	0.00340662	0.00182231	1.70122	F:receptor activity	IPR002919; G3DSA:2.10.25.10 (GENE3D), PTHR11339 (PANTHER)	cysteine-rich venom protein, putative [Source:VB External Description;Acc:AAEL000323]
AAEL003721-RA	heterogeneous nuclear	15.8167	up	0.00104579	0.000265228		11.1041	up	0.000533308	0.000192705	1.4244	F:structural constituent of cuticle	seg (SEG)	cuticle protein, putative [Source:VB External Description;Acc:AAEL009783]
AAEL014392-RA	tenascin c	15.562	up	0.00024066	1.52666e-05		13.1996	up	7.45076e-05	1.2454e-05	1.17897	P:regulation of actin filament polymerization; P:actin filament depolymerization; C:cytoskeleton; P:regulation of lamellipodium assembly; C:cell cortex; F:actin binding; P:bristle morphogenesis; C:plasma membrane	IPR002108; G3DSA:3.40.20.10 (GENE3D), PTHR13759 (PANTHER), SSF55753 (SUPERFAMILY)	Twinfilin [Source:VB External Description;Acc:AAEL005419]
AAEL017402-RA	cuticle protein	15.1887	up	0.00104578	0.000265027		15.0767	up	0.000228956	6.2417e-05	1.00743	F:protein binding	no IPS match	conserved hypothetical protein [Source:VB External Description;Acc:AAEL007408]
AAEL001022-RA	anterior fat body protein	13.9957	up	0.000214307	1.13159e-05		15.5916	up	2.21533e-05	1.59459e-06	0.897642	F:molecular_function; P:biological_process; C:cellular_component	IPR001680; IPR011046; IPR015943; IPR017986; IPR019781; IPR019782; PTHR22847 (PANTHER), PTHR22847:SF9 (PANTHER)	conserved hypothetical protein [Source:VB External Description;Acc:AAEL010937]
AAEL003816-RB	hypothetical protein AaeL_AAEL003816 [Aedes aegypti]	13.8595	up	0.00238423	0.00087529		9.58133	up	6.52205e-05	1.03908e-05	1.44652	C:nucleus; F:protein binding; F:transcription repressor activity; F:FMN binding	IPR009002; IPR012349; IPR014631; PTHR13343 (PANTHER), PTHR13343:SF4 (PANTHER)	conserved hypothetical protein [Source:VB External Description;Acc:AAEL005401]
AAEL000916-RA	larval pupal cuticle protein h1c	13.2684	up	0.000239389	1.42836e-05		11.4129	up	0.000441107	0.000151866	1.16258	-	PTHR12336 (PANTHER), seg (SEG), SignalP-NN(euk) (SIGNALP), tmhmm (TMHMM)	cuticle protein, putative [Source:VB External Description;Acc:AAEL002211]
AAEL003402-RC	sphingomyelin phosphodiesterase	13.196	up	0.000227427	1.2878e-05		16.2808	up	6.48863e-05	1.02744e-05	0.810527	-	IPR000408; IPR009091; PTHR22870 (PANTHER), PTHR22870:SF11 (PANTHER)	regulator of chromosome condensation [Source:VB External Description;Acc:AAEL009303]
AAEL005299-RA	fatty acyl- reductase 2	13.1432	up	0.000124779	1.77338e-06		10.9093	up	5.71791e-06	8.50753e-08	1.20477	-	no IPS match	hypothetical protein [Source:VB External Description;Acc:AAEL003848]
AAEL002777-RA	protein fam177a1-like	12.4971	up	0.00115103	0.000305032		9.78998	up	0.000290654	8.7949e-05	1.27652	-	no IPS match	conserved hypothetical protein [Source:VB External Description;Acc:AAEL002263]
AAEL000913-RA	larval pupal cuticle protein h1c	12.287	up	0.000995118	0.000245183		17.0955	up	1.16584e-05	4.4781e-07	0.718725	-	no IPS match	conserved hypothetical protein [Source:VB External Description;Acc:AAEL010452]
AAEL012400-RA	hydroxybutyrate dehydrogenase	12.2427	up	0.000220608	1.22088e-05		12.1614	up	5.64908e-05	8.06502e-06	1.00669	P:autophagy	IPR018731; PTHR13430 (PANTHER), PTHR13430:SF2 (PANTHER)	conserved hypothetical protein [Source:VB External Description;Acc:AAEL005985]
AAEL002223-RA	cuticle protein	12.0974	up	0.000447764	6.30004e-05		10.3812	up	2.26816e-05	1.66781e-06	1.16533	F:RNA binding; F:binding; F:transferase activity; F:molecular_function; P:symbiosis, encompassing mutualism through parasitism; C:cellular_component; F:protein binding	no IPS match	conserved hypothetical protein [Source:VB External Description;Acc:AAEL002875]
AAEL010014-RA	protocadherin fat 3	11.9491	up	0.000849212	0.000190922		10.3774	up	4.5357e-05	5.70488e-06	1.15145	-	no IPS match	hypothetical protein [Source:VB External Description;Acc:AAEL012630]
AAEL003402-RA	sphingomyelin phosphodiesterase	11.9311	up	0.000406814	5.18176e-05		13.9243	up	4.23243e-05	5.06395e-06	0.856852	F:transferase activity, transferring hexosyl groups; P:metabolic process	IPR002213; G3DSA:3.40.50.2000 (GENE3D), PTHR11926:SF16 (PANTHER), SSF53756 (SUPERFAMILY)	glucosyl/glucuronosyl transferases [Source:VB External Description;Acc:AAEL001365]
AAEL011461-RA	cuticle protein 6	11.912	up	0.000636914	0.000118608		8.69572	up	0.000448526	0.000155213	1.36987	-	no IPS match	hypothetical protein [Source:VB External Description;Acc:AAEL001392]
AAEL001392-RA	hypothetical protein AaeL_AAEL001392 [Aedes aegypti]	11.5009	up	0.000235733	1.36764e-05		10.1864	up	1.38738e-05	6.11743e-07	1.12905	F:receptor activity; F:peroxisome matrix targeting signal-2 binding	IPR001680; IPR011046; IPR015943; IPR017986; IPR019775; IPR019781; IPR019782; PTHR22850 (PANTHER), PTHR22850:SF29 (PANTHER)	peroxisomal targeting signal 2 receptor [Source:VB External Description;Acc:AAEL006491]
AAEL008701-RA	myoinositol oxygenase	11.4368	up	0.000876616	0.000201117		7.53006	up	1.19808e-05	4.70755e-07	1.51882	F:heme binding; P:oxidation reduction; F:monooxygenase activity; F:electron carrier activity	IPR001128; IPR002401; IPR017972; PTHR24292 (PANTHER)	cytochrome P450 [Source:VB External Description;Acc:AAEL007473]
AAEL003816-RA	hypothetical protein AaeL_AAEL003816 [Aedes aegypti]	11.4347	up	0.00232289	0.000840987		10.2572	up	4.40643e-05	5.42244e-06	1.11479	C:extracellular region	IPR001283; IPR002413; IPR014044; IPR018244; PS51257 (PROFILE)	cysteine-rich venom protein, putative [Source:VB External Description;Acc:AAEL008473]
AAEL008162-RA	protease m1 zinc metalloprotease	11.3744	up	0.000769756	0.00016449		11.6857	up	4.57468e-05	5.80866e-06	0.973361	P:JNK cascade; C:nucleus	IPR004038; G3DSA:3.30.1330.30 (GENE3D), PTHR10411 (PANTHER), PTHR10411:SF1 (PANTHER), SSF55315 (SUPERFAMILY)	conserved hypothetical protein [Source:VB External Description;Acc:AAEL006883]
AAEL009201-RA	hypothetical conserved protein	11.2795	up	0.00129202	0.000365667		10.6265	up	0.000202833	5.3431e-05	1.06145	-	IPR007614; IPR022727; seg (SEG), SignalP-NN(euk) (SIGNALP), tmhmm (TMHMM)	conserved hypothetical protein [Source:VB External Description;Acc:AAEL001683]
AAEL010337-RB	cral trio domain-containing protein	11.2066	up	0.000287612	2.42092e-05		11.4389	up	2.26794e-05	1.66e-06	0.979692	F:serine-type endopeptidase activity; P:proteolysis	IPR001254; IPR009003; G3DSA:2.40.10.10 (GENE3D), PTHR24262 (PANTHER), PTHR24262:SF174 (PANTHER)	mannose-binding protein-associated serine protease (MASP), putative [Source:VB External Description;Acc:AAEL014650]
AAEL004292-RA	salivary secreted protein	11.0912	up	0.0012518	0.000347382		7.94517	up	0.000360155	0.000116396	1.39597	F:catalytic activity; P:metabolic process; F:binding	IPR004262; IPR013120; IPR016040; PTHR11011 (PANTHER), PTHR11011:SF7 (PANTHER), SSF51735 (SUPERFAMILY)	conserved hypothetical protein [Source:VB External Description;Acc:AAEL005299]
AAEL009791-RA	cuticle	11.0347	up	0.00576205	0.00275254		7.523	up	0.00434319	0.00242154	1.4668	F:structural constituent of cuticle	no IPS match	conserved hypothetical protein [Source:VB External Description;Acc:AAEL004921]
AAEL007444-RB	camp-responsive element-binding 2-like	11.0229	up	7.36179e-05	1.31375e-07		11.7224	up	6.13041e-06	9.73537e-08	0.940327	F:GTP binding; P:eye pigment granule organization; P:olfactory learning; P:eye pigment precursor transport; P:small GTPase mediated signal transduction; F:GTPase activity; P:protein transport	IPR001806; IPR002041; IPR003578; IPR003579; IPR005225; IPR020849; G3DSA:3.40.50.300 (GENE3D), PTHR24073 (PANTHER), PTHR24073:SF264 (PANTHER), PS51419 (PROFILE), seg (SEG), SSF52540 (SUPERFAMILY)	rab32 [Source:VB External Description;Acc:AAEL006880]
AAEL010337-RA	cral trio domain-containing protein	11.0114	up	0.000524248	8.32099e-05		12.7475	up	1.91868e-05	1.16259e-06	0.863803	F:heme binding; P:oxidation reduction; F:monooxygenase activity; F:electron carrier activity	IPR001128; IPR002401; IPR017972; PTHR24290 (PANTHER), PTHR24290:SF165 (PANTHER), seg (SEG), SignalP-NN(euk) (SIGNALP), tmhmm (TMHMM)	cytochrome P450 [Source:VB External Description;Acc:AAEL014019]
AAEL007444-RA	camp-responsive element-binding 2-like	10.8781	up	7.36179e-05	2.70448e-07		11.6355	up	7.93048e-06	2.05418e-07	0.93491	F:GTP binding; P:eye pigment granule organization; P:olfactory learning; P:eye pigment precursor transport; P:small GTPase mediated signal transduction; F:GTPase activity; P:protein transport	IPR001806; IPR003579; IPR005225; G3DSA:3.40.50.300 (GENE3D), PTHR24073 (PANTHER), PTHR24073:SF264 (PANTHER), PS51419 (PROFILE), SSF52540 (SUPERFAMILY)	rab32 [Source:VB External Description;Acc:AAEL006880]
AAEL002233-RA	cuticle	10.7018	up	0.000528073	8.48203e-05		9.14745	up	0.000174463	4.36973e-05	1.16992	-	seg (SEG)	hypothetical protein [Source:VB External Description;Acc:AAEL011884]
AAEL001263-RA	hypothetical protein AaeL_AAEL001263 [Aedes aegypti]	10.5872	up	0.000504007	7.79291e-05		6.68602	up	0.00334274	0.0017835	1.58348	-	no IPS match	conserved hypothetical protein [Source:VB External Description;Acc:AAEL015154]
AAEL001143-RA	hypothetical protein AaeL_AAEL001143 [Aedes aegypti]	10.5081	up	0.000203732	9.8083e-06		10.8196	up	2.20566e-05	1.58283e-06	0.971208	C:integral to membrane; P:amino acid transport	IPR013057; PTHR22950 (PANTHER)	amino acid transporter [Source:VB External Description;Acc:AAEL003970]
AAEL003234-RA	mitochondrial cytochrome c oxidase subunit 6a isoform 1	10.3809	up	0.000434718	5.87471e-05		7.57739	up	7.07533e-05	1.15766e-05	1.36999	F:structural constituent of cuticle	IPR000618; PTHR12236 (PANTHER)	conserved hypothetical protein [Source:VB External Description;Acc:AAEL011461]
AAEL002233-RA	cuticle	10.374	up	0.00149737	0.000456257		10.4169	up	0.000338191	0.000107076	0.995883	P:intracellular signaling pathway; F:signal transducer activity; F:protein binding	IPR000980; IPR001849; IPR011993; IPR015012; PTHR10872 (PANTHER), PTHR10872:SF2 (PANTHER), SSF50729 (SUPERFAMILY), SSF55550 (SUPERFAMILY)	signal transduction protein lnk-realted [Source:VB External Description;Acc:AAEL004125]
AAEL008040-RA	brain chitinase and chia	10.3489	up	0.000220478	1.21557e-05		9.00909	up	7.65432e-06	1.75669e-07	1.14872	F:molecular_function; P:biological_process	no IPS match	conserved hypothetical protein [Source:VB External Description;Acc:AAEL014421]
AAEL011032-RA	hypothetical protein AaeL_AAEL011032 [Aedes aegypti]	10.1181	up	0.000752064	0.000158484		7.427	up	8.58924e-06	2.59359e-07	1.36234	F:metallopeptidase activity; P:proteolysis; F:zinc ion binding; F:aminopeptidase activity	IPR001930; IPR014782; IPR015569; SignalP-NN(euk) (SIGNALP), SSF55486 (SUPERFAMILY), SSF63737 (SUPERFAMILY)	protease m1 zinc metalloprotease [Source:VB External Description;Acc:AAEL008162]
AAEL009131-RA	cytochrome p450 CYP6Z8	10.0596	up	0.00129647	0.000367244		7.84557	up	9.48127e-06	3.06088e-07	1.2822	F:heme binding; P:oxidation reduction; F:monooxygenase activity; F:electron carrier activity	IPR001128; IPR002401; IPR017972; PTHR24292 (PANTHER), PTHR24292:SF175 (PANTHER)	cytochrome P450 [Source:VB External Description;Acc:AAEL014607]
AAEL001318-RA	cral trio domain-containing protein	9.96273	up	0.00226398	0.000812169		7.21615	up	0.000188082	4.84997e-05	1.38062	C:integral to membrane; P:homophilic cell adhesion; F:calcium ion binding; C:plasma membrane	IPR002126; IPR015919; IPR020894	hypothetical protein [Source:VB External Description;Acc:AAEL010014]
AAEL000921-RA	larval pupal cuticle protein h1c	9.89911	up	0.0059259	0.00284896		12.7352	up	0.00011091	2.31533e-05	0.777302	C:nucleus; F:zinc ion binding	IPR012934; SSF57716 (SUPERFAMILY)	conserved hypothetical protein [Source:VB External Description;Acc:AAEL011315]
AAEL003911-RA	-like protein subfamily c member 14	9.85655	up	0.00286357	0.00113111		9.99693	up	0.000316155	9.80621e-05	0.985957	-	no IPS match	conserved hypothetical protein [Source:VB External Description;Acc:AAEL005013]
AAEL012341-RA	lipase 3	9.85561	up	0.000112781	1.06371e-06		6.35789	up	3.01913e-05	2.81506e-06	1.55014	-	seg (SEG)	hypothetical protein [Source:VB External Description;Acc:AAEL002218]
AAEL000165-RB	salivary cys-rich secreted peptide	9.83834	up	0.000120555	1.36662e-06		9.9571	up	3.23865e-05	3.19248e-06	0.988073	F:oxidoreductase activity, acting on the CH-OH group of donors, NAD or NADP as acceptor; P:metabolic process; F:NAD or NADH binding	IPR006139; IPR006140; IPR016040; PTHR10996 (PANTHER), PTHR10996:SF26 (PANTHER), seg (SEG), SSF51735 (SUPERFAMILY), SSF52283 (SUPERFAMILY)	glyoxylate/hydroxypyruvate reductase [Source:VB External Description;Acc:AAEL004529]
AAEL006700-RA	silk gland derived serine protease	9.78276	up	0.000155813	4.41222e-06		9.06612	up	4.63119e-06	5.73413e-08	1.07905	-	SignalP-NN(euk) (SIGNALP)	conserved hypothetical protein [Source:VB External Description;Acc:AAEL001294]
AAEL002833-RA	cathepsin l	9.66857	up	0.000397041	4.92775e-05		6.85596	up	3.46397e-05	3.6631e-06	1.41024	-	seg (SEG)
AAEL007946-RA	glutathione-s-transferase gst GSTE6	9.5566	up	0.000175438	6.46696e-06		12.7072	up	2.06207e-06	9.62196e-10	0.752059	F:protein binding; F:mRNA binding	IPR007064; PTHR12746 (PANTHER), seg (SEG)	nonsense-mediated mRNA decay protein [Source:VB External Description;Acc:AAEL003039]
AAEL004884-RA	hemomucin	9.51094	up	0.000175438	6.51282e-06		10.8982	up	1.0764e-05	3.78067e-07	0.872704	F:protein binding; C:nucleus	IPR019340; PTHR13556 (PANTHER)	conserved hypothetical protein [Source:VB External Description;Acc:AAEL004675]
AAEL006798-RA	cytochrome p450 CYP9J10	9.46453	up	0.000157724	4.57984e-06		8.8665	up	3.24709e-06	2.42045e-08	1.06745	C:nuclear pore; F:SUMO binding; F:nuclear export signal receptor activity; P:multicellular organismal development; F:protein transporter activity; P:protein export from nucleus; P:centriole replication	IPR001494; IPR011989; IPR013598; IPR014877; IPR016024; PTHR11223 (PANTHER), PTHR11223:SF5 (PANTHER)	chromosome region maintenance protein 1/exportin [Source:VB External Description;Acc:AAEL001484]
AAEL013430-RA	prostaglandin e2 receptor ep4 subtype	9.30234	up	0.000162062	5.20217e-06		9.28442	up	2.37218e-05	1.86062e-06	1.00193	P:transmembrane transport	IPR011701; IPR016196; G3DSA:1.20.1250.20 (GENE3D), PTHR11328 (PANTHER), PTHR11328:SF24 (PANTHER)	conserved hypothetical protein [Source:VB External Description;Acc:AAEL006862]
AAEL011470-RA	cis,cis-muconate transport protein MucK, putative [Source:VB External Description;Acc:AAEL011470]	9.27862	up	0.000240526	1.47798e-05		5.81139	up	0.00430012	0.00239264	1.59663	-	seg (SEG), SignalP-NN(euk) (SIGNALP)	hypothetical protein [Source:VB External Description;Acc:AAEL002201]
AAEL002211-RA	cuticle protein	9.26867	up	0.000161584	5.07858e-06		7.26304	up	1.93626e-05	1.18891e-06	1.27614	F:serine-type endopeptidase activity; P:proteolysis	IPR001254; IPR001314; IPR009003; IPR018114; G3DSA:2.40.10.10 (GENE3D), PTHR24260 (PANTHER), PTHR24260:SF176 (PANTHER)	proacrosin, putative [Source:VB External Description;Acc:AAEL014139]
AAEL003670-RA	myelinprotein expression factor	9.11496	up	9.87079e-05	6.16773e-07		7.86089	up	3.81003e-06	3.21812e-08	1.15953	-	no IPS match	hypothetical protein [Source:VB External Description;Acc:AAEL003299]
AAEL011980-RA	hypothetical conserved secreted protein	9.05708	up	0.000346086	3.72714e-05		9.65645	up	8.26539e-05	1.47242e-05	0.937931	P:auxin biosynthetic process; F:ATPase activity, coupled to transmembrane movement of substances; P:transport; F:ATP binding; C:membrane	IPR000412; IPR003439; IPR003593; IPR017871; G3DSA:3.40.50.300 (GENE3D), PTHR24220 (PANTHER), PTHR24220:SF151 (PANTHER), PF12698 (PFAM), SSF52540 (SUPERFAMILY)	ABC transporter [Source:VB External Description;Acc:AAEL005491]
AAEL013223-RA	hypothetical protein AaeL_AAEL013223 [Aedes aegypti]	9.05093	up	0.00065943	0.000126596		8.78675	up	0.000118593	2.55166e-05	1.03007	C:nucleus; F:zinc ion binding	no IPS match	hypothetical protein [Source:VB External Description;Acc:AAEL008420]
AAEL001735-RA	pupal cuticle protein	9.03243	up	0.000254601	1.77179e-05		11.9531	up	0.000784429	0.000313193	0.755658	P:biological_process; C:cellular_component	G3DSA:3.80.10.10 (GENE3D), PTHR13382 (PANTHER), SSF52047 (SUPERFAMILY)	ATP synthase coupling factor B, putative [Source:VB External Description;Acc:AAEL008790]
AAEL012726-RA	hypothetical protein AaeL_AAEL012726 [Aedes aegypti]	8.97072	up	0.00313933	0.00128427		12.7989	up	0.000517687	0.000185753	0.700899	P:transmembrane transport	IPR011701; IPR016196; IPR020846; G3DSA:1.20.1250.20 (GENE3D), PTHR24064 (PANTHER)	synaptic vesicle protein [Source:VB External Description;Acc:AAEL001087]
AAEL011494-RA	odorant-binding protein	8.90192	up	0.000937342	0.000226009		8.13933	up	5.70038e-05	8.23908e-06	1.09369	F:pyridoxal phosphate binding; F:molybdenum ion binding; P:Mo-molybdopterin cofactor biosynthetic process; F:Mo-molybdopterin cofactor sulfurase activity; F:lyase activity	IPR000192; IPR005302; IPR005303; IPR015421; IPR015424; PTHR14237 (PANTHER), PTHR14237:SF3 (PANTHER), SSF141673 (SUPERFAMILY)	Molybdenum cofactor sulfurase 3 (MoCo sulfurase 3)(MOS 3)(EC 4.4.-.-)(Protein maroon-like 3)(Ma-l 3) [Source:VB External Description;Acc:AAEL011729]
AAEL002972-RA	chitinase 5	8.87466	up	0.000281525	2.30446e-05		7.61183	up	0.00125538	0.000557664	1.1659	F:ligase activity; P:metabolic process	IPR000873; IPR020845; G3DSA:3.30.300.30 (GENE3D), G3DSA:3.40.50.980 (GENE3D), PTHR24096 (PANTHER), PTHR24096:SF15 (PANTHER), SSF56801 (SUPERFAMILY)	AMP dependent ligase [Source:VB External Description;Acc:AAEL008144]
AAEL014607-RA	cytochrome p450	8.85593	up	0.000424438	5.61118e-05		9.71218	up	0.000118223	2.54071e-05	0.911838	F:structural constituent of cuticle	IPR000618; PTHR10380 (PANTHER), seg (SEG), SignalP-NN(euk) (SIGNALP), tmhmm (TMHMM)	hypothetical protein [Source:VB External Description;Acc:AAEL013030]
AAEL001902-RA	cysteine sulfinic acid decarboxylase	8.8102	up	0.0016161	0.00050777		5.92298	up	4.34929e-05	5.30027e-06	1.48746	P:allantoin biosynthetic process	IPR017580; IPR018020; PTHR10395 (PANTHER), PTHR10395:SF6 (PANTHER)	conserved hypothetical protein [Source:VB External Description;Acc:AAEL002087]
AAEL012430-RA	amp dependent ligase	8.72224	up	0.000170231	5.79624e-06		7.97373	up	0.00450841	0.00253645	1.09387	F:transcription regulator activity; P:regulation of transcription; C:nucleus	IPR001092; IPR011598; PTHR23349 (PANTHER), PTHR23349:SF5 (PANTHER)	hypothetical protein [Source:VB External Description;Acc:AAEL010557]
AAEL002263-RA	kda midgut protein	8.68983	up	0.00024892	1.6658e-05		6.99436	up	2.4144e-05	1.95531e-06	1.24241	P:proteolysis; F:serine-type endopeptidase activity	IPR001254; IPR001314; IPR009003; IPR018114; G3DSA:2.40.10.10 (GENE3D), PTHR24260 (PANTHER), PTHR24260:SF174 (PANTHER), SignalP-NN(euk) (SIGNALP)	Clip-domain serine protease, family C. Transcript A. [Source:VB External Description;Acc:AAEL007597]
AAEL014139-RA	serine protease	8.53674	up	0.000186691	8.19447e-06		9.08851	up	3.4203e-05	3.53319e-06	0.939289	C:integral to membrane	no IPS match	amino acid transporter [Source:VB External Description;Acc:AAEL007193]
AAEL013961-RA	isoform a	8.1835	up	0.000194688	8.99981e-06		7.89936	up	4.45541e-06	5.2044e-08	1.03597	C:extracellular region; F:calcium ion binding; F:phospholipase A2 activity; P:phospholipid metabolic process; P:lipid catabolic process	IPR001211; IPR016090; PTHR12253:SF5 (PANTHER)	secretory Phospholipase A2, putative [Source:VB External Description;Acc:AAEL001523]
AAEL011195-RA	mitochondrial phosphate carrier protein	8.1592	up	0.000597377	0.000106931		8.95104	up	3.5046e-05	3.71935e-06	0.911536	C:integral to membrane; C:membrane; P:sodium ion transport; P:transmembrane transport; P:ion transport; P:transport; F:transporter activity	IPR001734; PTHR11819:SF20 (PANTHER), tmhmm (TMHMM)	hypothetical protein [Source:VB External Description;Acc:AAEL000992]
AAEL008775-RA	hypothetical protein AaeL_AAEL008775 [Aedes aegypti]	8.1045	up	0.000396689	4.89914e-05		5.0026	up	0.000783228	0.000312401	1.62006	F:receptor activity	IPR002919; G3DSA:2.10.25.10 (GENE3D), PTHR11339 (PANTHER)	cysteine-rich venom protein, putative [Source:VB External Description;Acc:AAEL012204]
AAEL002187-RA	cuticle protein	8.08305	up	0.000310034	2.85268e-05		5.20936	up	0.000509638	0.000182092	1.55164	F:hydrolase activity	IPR002018; IPR019819; G3DSA:3.40.50.1820 (GENE3D), PTHR11559 (PANTHER), PTHR11559:SF27 (PANTHER), SSF53474 (SUPERFAMILY)	alpha-esterase [Source:VB External Description;Acc:AAEL015264]
AAEL007218-RA	fatty acyl- reductase 1	8.04953	up	0.000153064	4.18199e-06		6.9111	up	2.16299e-05	1.51396e-06	1.16472	-	PTHR12336 (PANTHER)	cuticle protein, putative [Source:VB External Description;Acc:AAEL002191]
AAEL004595-RA	isoform c	8.03859	up	0.000171449	6.15469e-06		6.99967	up	1.70026e-05	9.02222e-07	1.14842	-	IPR004119; IPR011009; IPR015897; G3DSA:3.90.1200.10 (GENE3D), PTHR11012 (PANTHER)	juvenile hormone-inducible protein, putative [Source:VB External Description;Acc:AAEL004242]
AAEL002263-RB	kda midgut protein	8.02537	up	0.000227182	1.28315e-05		6.86099	up	3.29792e-05	3.325e-06	1.16971	F:heme binding; P:oxidation reduction; F:monooxygenase activity; F:electron carrier activity	IPR001128; IPR002401; IPR017972; PTHR24292 (PANTHER), PTHR24292:SF131 (PANTHER)	conserved hypothetical protein [Source:VB External Description;Acc:AAEL009119]
AAEL014946-RA	caax prenyl protease 2	7.88132	up	0.00111839	0.000292728		8.87653	up	0.00013549	3.11453e-05	0.887883	P:auxin biosynthetic process; F:ATPase activity; F:ATP binding; C:integral to membrane	IPR003439; IPR013525; IPR020064; G3DSA:3.40.50.300 (GENE3D), PTHR19241 (PANTHER), SSF52540 (SUPERFAMILY)	ABC transporter [Source:VB External Description;Acc:AAEL011863]
AAEL008568-RA	glucosyl glucuronosyl transferases	7.84106	up	0.000588518	0.000104318		7.55486	up	1.38584e-05	6.04861e-07	1.03788	-	IPR011021; IPR011022; IPR014756; PTHR11188 (PANTHER), PTHR11188:SF13 (PANTHER)	conserved hypothetical protein [Source:VB External Description;Acc:AAEL014132]
AAEL010392-RA	hypothetical protein AaeL_AAEL010392 [Aedes aegypti]	7.31922	up	0.000214307	1.13166e-05		7.68174	up	1.96766e-05	1.23251e-06	0.952807	P:lipid metabolic process; F:phospholipase A1 activity	IPR000734; IPR002334; IPR013818; G3DSA:3.40.50.1820 (GENE3D), PTHR11610:SF10 (PANTHER), SSF53474 (SUPERFAMILY)	lipase [Source:VB External Description;Acc:AAEL007068]
AAEL006805-RA	cytochrome p450 CYP9J2	7.26177	up	0.000187885	8.39731e-06		7.05951	up	4.34929e-05	5.29697e-06	1.02865	-	no IPS match	phosphatidylethanolamine-binding protein [Source:VB External Description;Acc:AAEL012955]
AAEL002982-RA	matrix metalloproteinase	7.14056	up	0.000273456	2.18108e-05		7.32788	up	6.44441e-05	1.00737e-05	0.974437	C:intracellular organelle; F:zinc ion binding	IPR007087; IPR015880; IPR019496; PTHR13309 (PANTHER)	conserved hypothetical protein [Source:VB External Description;Acc:AAEL000699]
AAEL014411-RA	cytochrome p450 CYP304B3	7.05989	up	0.000336039	3.4872e-05		6.73995	up	0.000127437	2.8305e-05	1.04747	-	no IPS match	hypothetical protein [Source:VB External Description;Acc:AAEL001107]
AAEL002185-RA	cuticle protein, putative [Aedes aegypti]	7.04863	up	0.000155813	4.44719e-06		5.69804	up	1.10609e-05	4.1007e-07	1.23703	F:serine-type endopeptidase activity; P:proteolysis	PTHR22979 (PANTHER)	conserved hypothetical protein [Source:VB External Description;Acc:AAEL010552]
AAEL014614-RA	cytochrome p450	6.99207	up	0.000134638	2.625e-06		6.32229	up	3.97071e-05	4.56923e-06	1.10594	C:endoplasmic reticulum membrane; C:plasma membrane; C:basal part of cell; F:protein binding; P:asymmetric protein localization; C:integral to membrane; P:learning or memory; P:protein transport	IPR018469	conserved hypothetical protein [Source:VB External Description;Acc:AAEL007562]
AAEL010590-RA	aldose 1-epimerase	6.97179	up	0.000345696	3.70664e-05		5.90931	up	4.4883e-05	5.60257e-06	1.1798	-	no IPS match	conserved hypothetical protein [Source:VB External Description;Acc:AAEL014834]
AAEL000881-RA	cuticular protein 1 from cpfl family (agap010902-pa)	6.85434	up	0.000610017	0.000110464		7.46954	up	7.32254e-05	1.21379e-05	0.917639	-	no IPS match	hypothetical protein [Source:VB External Description;Acc:AAEL014456]
AAEL010935-RA	gamma glutamyl transpeptidases	6.82511	up	7.84972e-05	4.03931e-07		4.75664	up	0.000109692	2.28012e-05	1.43486	-	IPR005336; PTHR14154 (PANTHER), PTHR14154:SF3 (PANTHER)	conserved hypothetical protein [Source:VB External Description;Acc:AAEL002860]
AAEL002668-RA	amp dependent ligase	6.82382	up	0.000239707	1.43319e-05		6.04352	up	1.72693e-05	9.44736e-07	1.12911	P:mRNA capping; F:RNA binding; C:nucleus; F:methyltransferase activity	IPR004971; IPR016899; G3DSA:3.40.50.150 (GENE3D), PTHR12189 (PANTHER), SSF53335 (SUPERFAMILY)	mRNA (guanine-7-)methyltransferase [Source:VB External Description;Acc:AAEL011698]
AAEL007597-RA	serine protease	6.80193	up	0.000257138	1.85549e-05		5.68495	up	6.2755e-05	9.63326e-06	1.19648	C:ubiquitin ligase complex; P:protein ubiquitination; F:ubiquitin-protein ligase activity	IPR002110; IPR020683; PR01415 (PRINTS), PTHR24123 (PANTHER), PTHR24123:SF297 (PANTHER), PF12796 (PFAM)	ankyrin 2,3/unc44 [Source:VB External Description;Acc:AAEL014668]
AAEL012882-RA	folylpolyglutamate synthase	6.74916	up	0.000258792	1.91811e-05		5.19164	up	0.000105206	2.13845e-05	1.3	P:G-protein coupled receptor protein signaling pathway; C:integral to membrane; P:signal transduction; F:G-protein coupled receptor activity	no IPS match	hypothetical protein [Source:VB External Description;Acc:AAEL013430]
AAEL007905-RA	hypothetical protein AaeL_AAEL007905 [Aedes aegypti]	6.73587	up	0.000417584	5.43333e-05		7.07194	up	2.61393e-05	2.2144e-06	0.952478	F:serine-type endopeptidase activity; P:proteolysis	IPR001254; IPR001314; IPR006604; IPR009003; IPR018114; G3DSA:2.40.10.10 (GENE3D), PTHR24268 (PANTHER), PTHR24268:SF126 (PANTHER)	Clip-domain serine protease, family D. [Source:VB External Description;Acc:AAEL007796]
AAEL010552-RA	serine protease	6.67346	up	0.00920608	0.00492112		18.4843	up	0.00378817	0.00206279	0.361034	-	IPR001611; IPR019955; G3DSA:3.10.20.90 (GENE3D), G3DSA:3.80.10.10 (GENE3D), PTHR15140 (PANTHER), SSF52047 (SUPERFAMILY), SSF54236 (SUPERFAMILY)	tubulin-specific chaperone e [Source:VB External Description;Acc:AAEL004440]
AAEL013784-RA	elegans protein partially confirmed by transcript evidence	6.62385	up	0.00040773	5.22026e-05		6.01168	up	3.3655e-05	3.45266e-06	1.10183	-	IPR000859	conserved hypothetical protein [Source:VB External Description;Acc:AAEL010685]
AAEL013984-RA	collagen alpha-2 chain-like	6.51042	up	0.00246349	0.000918148		5.32923	up	5.10744e-05	6.85686e-06	1.22164	F:serine-type endopeptidase activity; P:proteolysis	IPR001254; IPR009003; G3DSA:2.40.10.10 (GENE3D), PTHR24260 (PANTHER), PTHR24260:SF174 (PANTHER)	serine protease snake, putative [Source:VB External Description;Acc:AAEL003251]
AAEL013224-RA	hypothetical protein AaeL_AAEL013224 [Aedes aegypti]	6.48156	up	0.000951567	0.000230338		7.31186	up	0.000288727	8.70376e-05	0.886444	P:mesoderm development; P:sarcomere organization; F:calcium ion binding; C:troponin complex; P:skeletal muscle thin filament assembly; P:cellular calcium ion homeostasis; P:muscle cell homeostasis; P:mitochondrion organization; F:tropomyosin binding	IPR001978; G3DSA:1.20.5.350 (GENE3D), PTHR11521 (PANTHER)	troponin t, invertebrate [Source:VB External Description;Acc:AAEL002417]
AAEL002519-RA	serine collagenase 1	6.47485	up	0.000204345	9.94383e-06		8.97466	up	1.00226e-05	3.28142e-07	0.721459	C:integral to plasma membrane; F:D-amino acid transmembrane transporter activity; F:neutral amino acid transmembrane transporter activity; P:neutral amino acid transport; P:neurotransmitter transport; P:L-amino acid transport; F:L-amino acid transmembrane transporter activity; F:sodium:amino acid symporter activity; F:neurotransmitter:sodium symporter activity; P:D-amino acid transport; P:sodium …	IPR000175; PTHR11616:SF19 (PANTHER)	sodium/chloride dependent amino acid transporter [Source:VB External Description;Acc:AAEL008424]
AAEL013039-RA	hypothetical protein AaeL_AAEL013039 [Aedes aegypti]	6.47371	up	0.000243577	1.57276e-05		5.71669	up	2.75812e-05	2.45321e-06	1.13242	-	IPR002110; IPR020683; PR01415 (PRINTS), PTHR24173 (PANTHER), PTHR24173:SF132 (PANTHER), PF12796 (PFAM)	sex-determining protein fem-1 [Source:VB External Description;Acc:AAEL010108]
AAEL007793-RA	alkyldihydroxyacetonephosphate synthase	6.45862	up	0.000346573	3.75433e-05		3.03318	up	0.000117374	2.51003e-05	2.12932	P:metabolic process; F:hydrolase activity	IPR002018; IPR002168; IPR019826; G3DSA:3.40.50.1820 (GENE3D), PTHR11559 (PANTHER), PTHR11559:SF27 (PANTHER), SSF53474 (SUPERFAMILY)
AAEL011341-RA	5 nucleotidase	6.44996	up	0.000614139	0.000111887		6.49128	up	4.4573e-05	5.53572e-06	0.993633	P:striated muscle contraction; P:dorsal closure, amnioserosa morphology change; P:establishment of neuroblast polarity; C:unconventional myosin complex; P:myosin II filament assembly; P:skeletal muscle thick filament assembly; P:ecdysone-mediated induction of salivary gland cell autophagic cell death; P:Malpighian tubule morphogenesis; P:dorsal closure, spreading of leading edge cells; P:sarcomer…	IPR000048; IPR001609; IPR002928; IPR004009; IPR015650; G3DSA:4.10.270.10 (GENE3D), PTHR13140 (PANTHER), SSF52540 (SUPERFAMILY)	myosin heavy chain, nonmuscle or smooth muscle [Source:VB External Description;Acc:AAEL005733]
AAEL005068-RA	s-phase kinase-associated protein 2	6.37604	up	0.000320912	3.09884e-05		5.3026	up	1.4284e-05	6.73145e-07	1.20243	F:structural constituent of cuticle	IPR000618	conserved hypothetical protein [Source:VB External Description;Acc:AAEL000419]
AAEL006968-RA	hypothetical protein AaeL_AAEL006968 [Aedes aegypti]	6.30225	up	0.00050978	7.97951e-05		4.8473	up	1.02046e-05	3.46815e-07	1.30016	F:heme binding; P:oxidation reduction; F:monooxygenase activity; F:electron carrier activity	IPR001128; IPR002401; IPR017972; PTHR24292 (PANTHER), PTHR24292:SF175 (PANTHER), seg (SEG), SignalP-NN(euk) (SIGNALP), tmhmm (TMHMM)	cytochrome P450 [Source:VB External Description;Acc:AAEL006798]
AAEL014671-RA	protease s51 alpha-aspartyl dipeptidase	6.29799	up	0.0043089	0.00191477		6.54895	up	0.00141987	0.000646341	0.96168	F:metal ion binding; F:zinc ion binding; F:protein binding	no IPS match	conserved hypothetical protein [Source:VB External Description;Acc:AAEL000940]
AAEL001308-RA	cral trio domain-containing protein	6.28647	up	0.00140241	0.000413402		7.53126	up	5.66465e-05	8.12992e-06	0.834718	-	no IPS match	hypothetical protein [Source:VB External Description;Acc:AAEL007833]
AAEL003251-RA	serine protease	6.28358	up	0.000184998	7.9557e-06		5.79498	up	9.72031e-05	1.88634e-05	1.08431	F:kinase activity	seg (SEG), SignalP-NN(euk) (SIGNALP), tmhmm (TMHMM)	protein serine/threonine kinase, putative [Source:VB External Description;Acc:AAEL001964]
AAEL000871-RA	isoform b	6.24793	up	0.000210944	1.08851e-05		4.42037	up	1.72155e-05	9.30767e-07	1.41344	F:nucleic acid binding; C:ribonucleoprotein complex	PR01228 (PRINTS)	heterogeneous nuclear ribonucleoprotein, putative [Source:VB External Description;Acc:AAEL003721]
AAEL007880-RA	ornithine decarboxylase	6.20469	up	0.00120356	0.000326698		3.48962	up	0.000850516	0.00034429	1.77804	P:gluconeogenesis; P:fatty acid biosynthetic process; F:triose-phosphate isomerase activity; P:pentose-phosphate shunt; P:glycolysis	seg (SEG)	triosephosphate isomerase [Source:VB External Description;Acc:AAEL002542]
AAEL017232-RA	cuticle protein	6.19502	up	0.000203732	9.87854e-06		4.97157	up	1.41092e-05	6.53848e-07	1.24609	F:gamma-glutamyltransferase activity	IPR000101; seg (SEG), SignalP-NN(euk) (SIGNALP), tmhmm (TMHMM), SSF56235 (SUPERFAMILY)	gamma glutamyl transpeptidases [Source:VB External Description;Acc:AAEL010935]
AAEL009968-RA	5 nucleotidase	6.13584	up	0.000661109	0.000127283		6.41115	up	2.65168e-05	2.30158e-06	0.957058	F:nucleic acid binding; C:intracellular; F:zinc ion binding	IPR007087; IPR013087; IPR015880; PTHR24376 (PANTHER), PTHR24376:SF381 (PANTHER), PF12874 (PFAM), SSF57667 (SUPERFAMILY)	zinc finger protein [Source:VB External Description;Acc:AAEL001924]
AAEL012867-RA	retinol-binding protein	6.11501	up	0.000122578	1.54676e-06		6.5237	up	7.93048e-06	2.01855e-07	0.937354	P:carbohydrate metabolic process; F:hydrolase activity, hydrolyzing O-glycosyl compounds; F:cation binding	IPR001360; IPR013781; IPR017853; IPR018120; PTHR10353:SF8 (PANTHER), seg (SEG)	glycoside hydrolases [Source:VB External Description;Acc:AAEL015021]
AAEL006102-RA	gelsolin precursor	6.1137	up	0.000997723	0.000245947		4.37257	up	7.47906e-05	1.25297e-05	1.39819	F:sphingomyelin phosphodiesterase activity; P:sphingomyelin catabolic process	IPR004843; IPR008139; IPR011001; IPR011160; G3DSA:3.60.21.10 (GENE3D), PTHR10340 (PANTHER), PTHR10340:SF13 (PANTHER), SSF56300 (SUPERFAMILY)	sphingomyelin phosphodiesterase [Source:VB External Description;Acc:AAEL003402]
AAEL007823-RA	argonaute isoform d	6.09972	up	0.000186691	8.17972e-06		5.10233	up	4.22824e-05	5.05306e-06	1.19548	C:extracellular region; F:chitin binding; P:chitin metabolic process	IPR002557; PTHR23301 (PANTHER), PS51257 (PROFILE)	conserved hypothetical protein [Source:VB External Description;Acc:AAEL002589]
AAEL012395-RA	atp-binding cassette transporter	6.08634	up	0.000505986	7.8545e-05		5.04187	up	6.48863e-05	1.02169e-05	1.20716	C:extracellular region; F:chitin binding; P:chitin metabolic process	IPR002557; PTHR23301 (PANTHER)	conserved hypothetical protein [Source:VB External Description;Acc:AAEL011897]
AAEL005068-RB	s-phase kinase-associated protein 2	6.06495	up	0.000237919	1.40359e-05		5.10797	up	2.13908e-05	1.49181e-06	1.18735	F:oxidoreductase activity, acting on the CH-OH group of donors, NAD or NADP as acceptor; P:metabolic process; F:NAD or NADH binding	IPR006139; IPR006140; IPR016040; PTHR10996 (PANTHER), PTHR10996:SF26 (PANTHER), SSF51735 (SUPERFAMILY), SSF52283 (SUPERFAMILY)	glyoxylate/hydroxypyruvate reductase [Source:VB External Description;Acc:AAEL004532]
AAEL005058-RA	crbn_drogr ame: full=protein cereblon homolog	5.9994	up	0.000210944	1.09064e-05		5.82438	up	1.55585e-05	7.8038e-07	1.03005	C:nucleus; F:zinc ion binding	IPR006616; PF11901 (PFAM)	conserved hypothetical protein [Source:VB External Description;Acc:AAEL011177]
AAEL011897-RA	cuticular protein analogous to peritrophins 3-e	5.99607	up	7.36179e-05	3.06666e-07		5.68307	up	6.26581e-06	1.07663e-07	1.05508	P:oxidation reduction; P:transport; F:oxygen transporter activity; F:monophenol monooxygenase activity	IPR000896; IPR002227; IPR005203; IPR005204; IPR008922; IPR013788; IPR014756; PTHR11511:SF4 (PANTHER)	Prophenoloxidase [Source:VB External Description;Acc:AAEL013499]
AAEL008882-RA	notch homolog 1b	5.97692	up	0.000464034	6.77688e-05		7.00771	up	0.000369332	0.000120622	0.852905	C:cytoplasm; F:lipoate synthase activity; F:4 iron, 4 sulfur cluster binding; P:lipoate biosynthetic process	IPR003698; IPR006638; IPR007197; IPR013785; SSF102114 (SUPERFAMILY)	lipoic acid synthetase [Source:VB External Description;Acc:AAEL009368]
AAEL003041-RA	cuticular protein rr-1 family (agap000344-pa)	5.97269	up	0.000355506	3.92441e-05		5.3987	up	1.39831e-05	6.29093e-07	1.10632	C:lipid particle	PS51257 (PROFILE)	anterior fat body protein [Source:VB External Description;Acc:AAEL001020]
AAEL003848-RA	hypothetical protein AaeL_AAEL003848 [Aedes aegypti]	5.96078	up	0.000135787	2.8406e-06		6.16451	up	0.000345377	0.000110106	0.966952	C:integral to membrane	IPR006629; PTHR23292 (PANTHER)	conserved hypothetical protein [Source:VB External Description;Acc:AAEL010879]
AAEL007909-RA	branched-chain amino acid aminotransferase	5.95707	up	0.000340208	3.56797e-05		5.47125	up	0.000694138	0.000268271	1.08879	F:heme binding; P:oxidation reduction; P:response to insecticide; F:monooxygenase activity; F:electron carrier activity	IPR001128; IPR002401; IPR017972; PTHR24305 (PANTHER), PTHR24305:SF95 (PANTHER)	cytochrome P450 [Source:VB External Description;Acc:AAEL001960]
AAEL003452-RA	isoform a	5.9508	up	0.000213144	1.11246e-05		5.86422	up	5.215e-06	7.24763e-08	1.01476	-	no IPS match	conserved hypothetical protein [Source:VB External Description;Acc:AAEL001561]
AAEL010154-RA	cytochrome p450 CYP4AR2	5.94621	up	0.000209343	1.05928e-05		7.17822	up	5.5416e-05	7.77791e-06	0.828369	P:cellular iron ion homeostasis; F:oxidoreductase activity; F:ferric iron binding; P:oxidation reduction; P:iron ion transport	IPR001519; IPR008331; IPR009040; IPR009078; IPR012347; PTHR11431:SF2 (PANTHER)	secreted ferritin G subunit precursor, putative [Source:VB External Description;Acc:AAEL007383]
AAEL000419-RA	cuticular protein isoform a	5.9439	up	0.000258792	1.93485e-05		5.32332	up	7.65432e-06	1.68532e-07	1.11658	-	IPR000782	conserved hypothetical protein [Source:VB External Description;Acc:AAEL008907]
AAEL008355-RA	hypothetical protein AaeL_AAEL008355 [Aedes aegypti]	5.9333	up	0.000481154	7.21553e-05		5.208	up	4.30747e-05	5.20131e-06	1.13927	C:integral to membrane; C:brush border; P:cation transport; P:transmembrane transport; F:solute:hydrogen antiporter activity	IPR006153; seg (SEG), tmhmm (TMHMM)	conserved hypothetical protein [Source:VB External Description;Acc:AAEL011109]
AAEL001295-RA	protein takeout	5.92821	up	0.000134531	2.54438e-06		4.28901	up	6.93156e-05	1.12524e-05	1.38219	-	PTHR12336 (PANTHER)	conserved hypothetical protein [Source:VB External Description;Acc:AAEL002223]
AAEL000374-RA	cysteine-rich venom	5.87938	up	0.00050978	7.9821e-05		3.36344	up	3.94623e-05	4.5171e-06	1.74803	-	IPR001810; IPR022364; G3DSA:3.80.10.10 (GENE3D), PF12937 (PFAM), SSF52047 (SUPERFAMILY)	hypothetical protein [Source:VB External Description;Acc:AAEL009487]
AAEL008955-RA	hypothetical protein AaeL_AAEL008955 [Aedes aegypti]	5.87538	up	0.000287612	2.41959e-05		5.9628	up	1.98882e-05	1.2664e-06	0.985339	F:asparaginase activity	PTHR12498 (PANTHER)	protein N-terminal asparagine amidohydrolase, putative [Source:VB External Description;Acc:AAEL004952]
AAEL014668-RA	ankyrin unc44	5.86063	up	0.000363874	4.08544e-05		4.0707	up	0.000737625	0.000289552	1.43971	P:salivary gland cell autophagic cell death; F:cysteine-type endopeptidase activity; P:regulation of catalytic activity; P:proteolysis	IPR000169; IPR000668; IPR012599; IPR013128; IPR015643; G3DSA:3.90.70.10 (GENE3D), SSF54001 (SUPERFAMILY)	cathepsin b [Source:VB External Description;Acc:AAEL009637]
AAEL004682-RA	glycolipid transfer protein domain-containing protein 1-like	5.83996	up	0.000237436	1.39343e-05		6.36866	up	8.54547e-06	2.52639e-07	0.916984	C:cytoplasm; P:regulation of transcription; F:RNA binding; P:RNA metabolic process; F:catalytic activity	IPR004087; IPR004088; IPR009210; IPR018111; IPR019510; G3DSA:3.30.1370.10 (GENE3D), G3DSA:3.90.1140.10 (GENE3D), PTHR13360 (PANTHER), SSF54791 (SUPERFAMILY)	conserved hypothetical protein [Source:VB External Description;Acc:AAEL011050]
AAEL002589-RA	peritrophic matrix protein 14	5.83821	up	0.000341669	3.6126e-05		4.62815	up	5.95796e-06	9.03291e-08	1.26146	F:transferase activity, transferring hexosyl groups; P:metabolic process	IPR002213; G3DSA:3.40.50.2000 (GENE3D), PTHR11926:SF16 (PANTHER), SSF53756 (SUPERFAMILY)	glucosyl/glucuronosyl transferases [Source:VB External Description;Acc:AAEL008568]
AAEL006487-RA	sodium solute symporter	5.79361	up	0.000395626	4.83831e-05		4.51685	up	7.45647e-05	1.2473e-05	1.28267	F:odorant binding; P:transport	IPR023316; PTHR21066 (PANTHER)	odorant-binding protein 47b, putative [Source:VB External Description;Acc:AAEL011494]
AAEL010529-RA	hypothetical protein AaeL_AAEL010529 [Aedes aegypti]	5.79125	up	0.00054932	9.26077e-05		5.74667	up	0.000170337	4.2233e-05	1.00776	F:heme binding; P:oxidation reduction; F:monooxygenase activity; F:electron carrier activity	IPR001128; IPR002401; IPR017972; PTHR24292 (PANTHER), PTHR24292:SF175 (PANTHER)	cytochrome P450 [Source:VB External Description;Acc:AAEL002638]
AAEL001847-RA	dna-directed rna mitochondrial	5.76525	up	0.000161584	5.10292e-06		4.77265	up	0.000183424	4.68352e-05	1.20798	F:ATP-dependent peptidase activity; P:proteolysis	SignalP-NN(euk) (SIGNALP)	conserved hypothetical protein [Source:VB External Description;Acc:AAEL005058]
AAEL004197-RA	hypothetical protein AaeL_AAEL004197 [Aedes aegypti]	5.7515	up	0.000845437	0.00018997		4.00899	up	0.000247274	6.97877e-05	1.43465	-	IPR004119; IPR011009; IPR015897; G3DSA:3.90.1200.10 (GENE3D), PTHR11012 (PANTHER)	conserved hypothetical protein [Source:VB External Description;Acc:AAEL010163]
AAEL003452-RB	isoform a	5.70217	up	0.000107618	7.61254e-07		5.721	up	2.89667e-06	2.01284e-08	0.996708	F:dipeptidase activity; F:metalloexopeptidase activity; F:dipeptidyl-peptidase activity; P:proteolysis	IPR000180; IPR008257; G3DSA:3.20.20.140 (GENE3D), seg (SEG), SignalP-NN(euk) (SIGNALP), tmhmm (TMHMM), SSF51556 (SUPERFAMILY)	microsomal dipeptidase [Source:VB External Description;Acc:AAEL000842]
AAEL014616-RA	cytochrome p450 CYP9J27	5.64777	up	0.000181331	7.12723e-06		7.23801	up	0.000276423	8.18618e-05	0.780293	C:cytosol; C:integral to membrane	IPR007248	peroxisomal membrane protein 2, pxmp2 [Source:VB External Description;Acc:AAEL006538]
AAEL004532-RA	glyoxylate hydroxypyruvate reductase	5.63116	up	0.000182405	7.46203e-06		5.85889	up	4.39419e-05	5.39073e-06	0.961131	P:biological_process; C:cellular_component; F:chitin binding; P:chitin metabolic process; C:extracellular region	no IPS match	conserved hypothetical protein [Source:VB External Description;Acc:AAEL013475]
AAEL006909-RA	hypothetical protein AaeL_AAEL006909 [Aedes aegypti]	5.61989	up	0.000994623	0.000244607		5.54159	up	0.000522122	0.000187674	1.01413	-	IPR000409; IPR001680; IPR011009; IPR011046; IPR015943; IPR017986; IPR019781; IPR019782; PTHR22847 (PANTHER), PTHR22847:SF60 (PANTHER)	hypothetical protein [Source:VB External Description;Acc:AAEL001647]
AAEL003280-RA	TRANSCRIPT NOT FOUND ON VECTORBASE	5.61789	up	0.0006862	0.000134852		3.91932	up	0.000164297	4.01455e-05	1.43338	-	IPR002110; IPR020683; PR01415 (PRINTS), PTHR24123 (PANTHER), PTHR24123:SF297 (PANTHER), PF12796 (PFAM)	ankyrin 2,3/unc44 [Source:VB External Description;Acc:AAEL014742]
AAEL001677-RA	cuticular protein 2 from low complexity family (agap006145-pa)	5.60634	up	0.000107618	7.96964e-07		5.17577	up	2.46447e-05	2.02316e-06	1.08319	F:hydrolase activity, acting on glycosyl bonds; P:carbohydrate metabolic process; F:cation binding	IPR006047; IPR006589; IPR013781; IPR015902; IPR017853; G3DSA:3.90.400.10 (GENE3D), PTHR10357:SF76 (PANTHER), SSF51011 (SUPERFAMILY)	alpha-amylase [Source:VB External Description;Acc:AAEL010536]
AAEL004972-RB	isoform i	5.59835	up	0.000112781	1.07779e-06		4.13911	up	0.000192326	4.97884e-05	1.35255	C:intracellular; P:transport; F:transporter activity	IPR001071; IPR001251; IPR008273; IPR011074; G3DSA:1.10.8.20 (GENE3D), PTHR23324 (PANTHER), PTHR23324:SF14 (PANTHER)	CRAL/TRIO domain-containing protein [Source:VB External Description;Acc:AAEL010337]
AAEL002307-RA	leucine-rich transmembrane protein	5.5983	up	0.000315153	2.93911e-05		6.45007	up	2.26934e-05	1.69448e-06	0.867943	F:sequence-specific DNA binding; F:transcription factor activity; C:nucleus; P:regulation of transcription, DNA-dependent	IPR000418; IPR011991; PTHR11849 (PANTHER), PTHR11849:SF44 (PANTHER), SSF46785 (SUPERFAMILY)	Ets domain-containing protein [Source:VB External Description;Acc:AAEL003845]
AAEL002737-RA	mitochondrial cytochrome c oxidase subunit 7c	5.59135	up	0.000112781	1.00811e-06		5.65295	up	7.65432e-06	1.68964e-07	0.989103	C:extracellular space; P:signal transduction; F:receptor binding	IPR002181; IPR014715; IPR014716; IPR020837; PTHR19143 (PANTHER), PTHR19143:SF129 (PANTHER)	fibrinogen and fibronectin [Source:VB External Description;Acc:AAEL008646]
AAEL010694-RA	5-formyltetrahydrofolate cyclo-ligase	5.5758	up	0.000927321	0.000221434		5.88928	up	0.000118223	2.5396e-05	0.94677	F:metalloendopeptidase activity; P:proteolysis; F:zinc ion binding	IPR001506; IPR006026; IPR024079; PTHR10127 (PANTHER), SSF55486 (SUPERFAMILY)	metalloproteinase, putative [Source:VB External Description;Acc:AAEL014514]
AAEL007510-RA	hypothetical protein AaeL_AAEL007510 [Aedes aegypti]	5.57278	up	0.000180424	6.97121e-06		5.34567	up	3.06769e-05	2.89581e-06	1.04249	-	IPR004942; G3DSA:3.30.450.30 (GENE3D), PTHR13323 (PANTHER), SSF103196 (SUPERFAMILY)	late endosomal/lysosomal MP1 interacting protein, putative [Source:VB External Description;Acc:AAEL011529]
AAEL004273-RA	short-chain dehydrogenase	5.57189	up	0.00183859	0.000608208		5.39765	up	0.000228296	6.19559e-05	1.03228	P:auxin biosynthetic process; P:carbohydrate phosphorylation; F:galactose binding; C:membrane fraction; F:ATP binding; P:galactose metabolic process; F:galactokinase activity; C:cytosol	IPR000705; IPR006203; IPR006204; IPR006206; IPR013750; IPR014721; IPR019539; IPR019741; IPR020568; G3DSA:3.30.70.890 (GENE3D), PTHR10457 (PANTHER), PTHR10457:SF6 (PANTHER), seg (SEG), SSF55060 (SUPERFAMILY)	galactokinase [Source:VB External Description;Acc:AAEL002781]
AAEL014834-RA	hypothetical protein AaeL_AAEL014834 [Aedes aegypti]	5.54788	up	0.00235904	0.000862746		8.84273	up	8.6537e-05	1.58533e-05	0.627395	P:micropyle formation; P:negative regulation of antimicrobial humoral response; P:compound eye photoreceptor fate commitment; P:dorsal appendage formation; P:regulation of transcription, DNA-dependent; P:phagocytosis, engulfment; F:protein dimerization activity; C:cytoplasm; P:establishment of planar polarity; P:JNK cascade; P:imaginal disc fusion, thorax closure; F:sequence-specific DNA binding;…	seg (SEG)	jun [Source:VB External Description;Acc:AAEL003505]
AAEL005419-RA	twinfilin	5.50889	up	0.000815856	0.000180724		4.04053	up	0.00171345	0.000811806	1.36341	-	seg (SEG), SignalP-NN(euk) (SIGNALP), tmhmm (TMHMM)	hypothetical protein [Source:VB External Description;Acc:AAEL003816]
AAEL011771-RA	protein adg3	5.50603	up	0.000134638	2.62056e-06		4.88767	up	1.19097e-05	4.66457e-07	1.12652	P:oxidation reduction; F:sterol binding; F:oxidoreductase activity	IPR002198; IPR002347; IPR016040; PTHR24322 (PANTHER), PTHR24322:SF32 (PANTHER), SSF51735 (SUPERFAMILY)	short-chain dehydrogenase [Source:VB External Description;Acc:AAEL001427]
AAEL005826-RA	seven in absentia	5.47293	up	0.000161405	4.93016e-06		5.61028	up	1.39162e-05	6.15374e-07	0.975518	-	seg (SEG), tmhmm (TMHMM)	conserved hypothetical protein [Source:VB External Description;Acc:AAEL014318]
AAEL002929-RA	amp dependent ligase	5.41508	up	0.000936929	0.000225335		5.85825	up	4.24892e-05	5.09441e-06	0.92435	F:3',5'-cyclic-AMP phosphodiesterase activity; C:cytoplasm; F:metal ion binding; C:cell fraction; P:signal transduction	IPR002073; IPR003607; IPR023088; IPR023174; PTHR11347 (PANTHER), PTHR11347:SF36 (PANTHER), SSF109604 (SUPERFAMILY)	cAMP-specific 3,5-cyclic phosphodiesterase [Source:VB External Description;Acc:AAEL013473]
AAEL008988-RA	adult cuticle	5.41236	up	0.00281205	0.00109877		6.25784	up	0.00908023	0.00564431	0.864893	F:acid phosphatase activity	IPR000560; IPR016274; G3DSA:3.40.50.1240 (GENE3D), PTHR20963 (PANTHER), PTHR20963:SF8 (PANTHER), SSF53254 (SUPERFAMILY)	multiple inositol polyphosphate phosphatase [Source:VB External Description;Acc:AAEL014842]
AAEL005832-RA	programmed cell death	5.38794	up	0.000155813	4.49542e-06		5.52225	up	3.2476e-05	3.23578e-06	0.975677	F:ligase activity; P:metabolic process	IPR000873; G3DSA:3.40.50.980 (GENE3D), PTHR24096 (PANTHER), PTHR24096:SF15 (PANTHER), SSF56801 (SUPERFAMILY)	AMP dependent ligase [Source:VB External Description;Acc:AAEL003643]
AAEL008731-RA	hypothetical protein AaeL_AAEL000537 [Aedes aegypti]	5.37932	up	0.00178734	0.000584686		4.71022	up	0.000364816	0.000118732	1.14205	P:autophagy	IPR015412; PTHR13190 (PANTHER), PTHR13190:SF6 (PANTHER)	conserved hypothetical protein [Source:VB External Description;Acc:AAEL003799]
AAEL000186-RA	gamma-glutamyl cyclotransferase-like venom protein isoform 2	5.34513	up	0.000147572	3.54098e-06		4.4355	up	9.81044e-05	1.91375e-05	1.20508	F:structural constituent of cuticle	IPR000618; PTHR10380 (PANTHER), PTHR10380:SF24 (PANTHER)	conserved hypothetical protein [Source:VB External Description;Acc:AAEL003041]
AAEL011884-RA	hypothetical protein AaeL_AAEL011884 [Aedes aegypti]	5.33889	up	0.000634287	0.000117734		5.48222	up	1.82566e-05	1.06691e-06	0.973856	F:metal ion binding; P:intracellular signaling pathway	IPR002219; G3DSA:3.30.60.20 (GENE3D), PTHR21119 (PANTHER), PTHR21119:SF2 (PANTHER), SSF57889 (SUPERFAMILY)	hypothetical protein [Source:VB External Description;Acc:AAEL010750]
AAEL009119-RA	cytochrome p450	5.3336	up	0.000309623	2.82217e-05		4.20475	up	5.58033e-06	7.82586e-08	1.26847	F:catalytic activity; P:metabolic process; F:binding	IPR004262; IPR013120; IPR016040; PTHR11011 (PANTHER), PTHR11011:SF15 (PANTHER), SSF51735 (SUPERFAMILY)	conserved hypothetical protein [Source:VB External Description;Acc:AAEL007218]
AAEL009032-RA	cg3823 cg3823-pa	5.312	up	0.000111575	8.6622e-07		5.18973	up	4.52906e-05	5.68207e-06	1.02356	P:transmembrane transport	IPR011701; IPR016196; G3DSA:1.20.1250.20 (GENE3D), PTHR24003 (PANTHER), PTHR24003:SF12 (PANTHER)	conserved hypothetical protein [Source:VB External Description;Acc:AAEL009198]
AAEL008793-RA	upf0183 protein cg7083-like	5.29389	up	0.000177843	6.64568e-06		3.99857	up	8.93433e-05	1.65838e-05	1.32395	F:heme binding; P:oxidation reduction; F:monooxygenase activity; F:electron carrier activity	IPR001128; IPR002401; IPR017972; PTHR24290 (PANTHER), PTHR24290:SF187 (PANTHER)	cytochrome P450 [Source:VB External Description;Acc:AAEL009131]
AAEL000037-RA	serine protease 14	5.26257	up	0.00065943	0.000126671		3.46396	up	4.45517e-05	5.51864e-06	1.51924	F:heme binding; P:oxidation reduction; F:monooxygenase activity; F:electron carrier activity	seg (SEG)	cytochrome P450 [Source:VB External Description;Acc:AAEL014606]
AAEL005927-RA	d-lactate dehydrognease	5.25191	up	0.000169859	5.7015e-06		5.75552	up	0.000136275	3.1456e-05	0.9125	P:sensory perception of mechanical stimulus; P:sensory cilium assembly; C:centriole; P:centriole replication; C:microtubule basal body; P:sperm axoneme assembly; P:single fertilization; C:pericentriolar material	seg (SEG), SignalP-NN(euk) (SIGNALP)	conserved hypothetical protein [Source:VB External Description;Acc:AAEL012031]
AAEL003697-RA	serpin 17 inhibitory serine protease inhibitor	5.2421	up	8.15508e-05	4.46319e-07		4.99352	up	7.93048e-06	2.08084e-07	1.04978	F:asparagine synthase (glutamine-hydrolyzing) activity; P:asparagine biosynthetic process	IPR001962; IPR014729; IPR017932; G3DSA:3.60.20.10 (GENE3D), PTHR11772 (PANTHER), SSF52402 (SUPERFAMILY), SSF56235 (SUPERFAMILY)	asparagine synthetase [Source:VB External Description;Acc:AAEL006457]
AAEL000555-RA	hypothetical protein AaeL_AAEL000555 [Aedes aegypti]	5.21681	up	0.00234502	0.000854008		4.66051	up	0.000517758	0.000185843	1.11937	F:serine-type endopeptidase inhibitor activity; F:peptidase activity	IPR000215; IPR023796; G3DSA:2.30.39.10 (GENE3D), G3DSA:3.30.497.10 (GENE3D), PTHR11461:SF114 (PANTHER)	serine protease inhibitor (serpin) homologue - unlikely to be inhibitory. [Source:VB External Description;Acc:AAEL003697]
AAEL008144-RA	amp dependent ligase	5.21463	up	0.000301821	2.66987e-05		4.8267	up	5.36026e-05	7.41565e-06	1.08037	-	no IPS match	hypothetical protein [Source:VB External Description;Acc:AAEL012849]
AAEL002875-RA	conserved plasmodium protein	5.21316	up	0.00145369	0.000437246		3.92671	up	2.3654e-05	1.8439e-06	1.32762	-	no IPS match	conserved hypothetical protein [Source:VB External Description;Acc:AAEL001143]
AAEL002191-RA	cuticle protein	5.19906	up	0.000375684	4.33078e-05		3.98275	up	0.000121455	2.62796e-05	1.30539	P:protein folding; F:heat shock protein binding; F:unfolded protein binding	IPR001623; IPR003095; PTHR24078 (PANTHER), PTHR24078:SF11 (PANTHER)	conserved hypothetical protein [Source:VB External Description;Acc:AAEL003911]
AAEL006201-RA	isoform a	5.18092	up	0.0022415	0.000801908		4.52894	up	0.000785138	0.000313758	1.14396	-	seg (SEG), SignalP-NN(euk) (SIGNALP), tmhmm (TMHMM)	predicted protein [Source:VB External Description;Acc:AAEL008534]
AAEL002211-RA	cuticle protein	5.17716	up	0.000257138	1.83115e-05		4.0306	up	4.86711e-05	6.37059e-06	1.28446	F:structural constituent of cuticle	IPR000618; PTHR10380 (PANTHER), PTHR10380:SF67 (PANTHER)	pupal cuticle protein 78E, putative [Source:VB External Description;Acc:AAEL001735]
AAEL007375-RB	pyruvate dehydrogenase	5.17133	up	0.00018375	7.68714e-06		5.25182	up	4.87807e-06	6.40555e-08	0.984674	-	PTHR23167 (PANTHER), PTHR23167:SF1 (PANTHER)	paramyosin, putative [Source:VB External Description;Acc:AAEL007151]
AAEL011333-RA	cg7248 cg7248- partial	5.15774	up	0.000546084	9.05265e-05		4.42164	up	6.48863e-05	1.02749e-05	1.16648	F:serine-type endopeptidase inhibitor activity; F:peptidase activity	IPR000215; IPR023796; G3DSA:2.30.39.10 (GENE3D), G3DSA:3.30.497.10 (GENE3D), PTHR11461:SF114 (PANTHER)	serine protease inhibitor (serpin) homologue - unlikely to be inhibitory. [Source:VB External Description;Acc:AAEL003697]
AAEL003299-RA	gly-rich secreted peptide	5.14539	up	0.000258792	1.93302e-05		3.45034	up	0.000161635	3.91951e-05	1.49127	P:allantoin biosynthetic process	IPR017580; IPR018020; PTHR10395 (PANTHER), PTHR10395:SF6 (PANTHER)	conserved hypothetical protein [Source:VB External Description;Acc:AAEL008436]
AAEL002737-RB	cytochrome c subunit	5.139	up	0.000129789	2.28101e-06		5.10619	up	1.78244e-05	9.99876e-07	1.00643	F:structural constituent of cuticle	IPR000618; PTHR10380 (PANTHER), PTHR10380:SF66 (PANTHER)	pupal cuticle protein 78E, putative [Source:VB External Description;Acc:AAEL008869]
AAEL002611-RA	hypothetical protein AaeL_AAEL002611 [Aedes aegypti]	5.13386	up	0.000161673	5.15459e-06		4.78081	up	3.14272e-05	3.00249e-06	1.07385	F:sphingomyelin phosphodiesterase activity; P:sphingomyelin catabolic process	tmhmm (TMHMM)	sphingomyelin phosphodiesterase [Source:VB External Description;Acc:AAEL003402]
AAEL000064-RA	dopachrome conversion enzyme	5.12574	up	0.00070746	0.000142177		5.03027	up	7.99173e-05	1.3853e-05	1.01898	-	no IPS match	conserved hypothetical protein [Source:VB External Description;Acc:AAEL001561]
AAEL003150-RA	alpha-n-acetyl glucosaminidase	5.12282	up	0.000437549	5.9911e-05		5.39257	up	5.5416e-05	7.78739e-06	0.949977	P:muscle cell fate specification; P:mesoderm development; P:muscle organ morphogenesis; P:anterior/posterior pattern formation	IPR007940	conserved hypothetical protein [Source:VB External Description;Acc:AAEL003824]
AAEL012296-RA	cytochrome c oxidase assembly protein cox19	5.12194	up	0.00108474	0.000278694		5.52393	up	0.000492839	0.000174831	0.927227	F:Rab GTPase activator activity; C:intracellular; P:regulation of Rab GTPase activity	IPR000195; G3DSA:1.10.8.270 (GENE3D), PTHR22957 (PANTHER), PTHR22957:SF28 (PANTHER)	conserved hypothetical protein [Source:VB External Description;Acc:AAEL007211]
AAEL011768-RA	hypothetical protein AaeL_AAEL011768 [Aedes aegypti]	5.11774	up	0.000169859	5.74256e-06		4.73637	up	1.39517e-05	6.20009e-07	1.08052	F:receptor activity; P:determination of adult lifespan; P:regulation of protein ubiquitination	IPR004241; G3DSA:3.10.20.90 (GENE3D), PTHR10969:SF5 (PANTHER), seg (SEG), SSF54236 (SUPERFAMILY)	gaba(a) receptor-associated protein [Source:VB External Description;Acc:AAEL007162]
AAEL014138-RA	serine protease serpin	5.08801	up	0.000258792	1.88696e-05		4.68342	up	3.76196e-05	4.22538e-06	1.08639	F:serine-type endopeptidase activity; P:proteolysis	tmhmm (TMHMM)	serine protease [Source:VB External Description;Acc:AAEL002585]
AAEL011368-RA	sugar transporter	5.07869	up	0.000525655	8.43676e-05		3.92859	up	0.00361556	0.00195144	1.29275	-	PTHR12336 (PANTHER), seg (SEG), SignalP-NN(euk) (SIGNALP), tmhmm (TMHMM)	cuticle protein, putative [Source:VB External Description;Acc:AAEL002211]
AAEL006964-RA	hypothetical protein AaeL_AAEL006964 [Aedes aegypti]	5.06993	up	0.000688348	0.00013565		5.81595	up	5.12063e-05	6.90946e-06	0.871729	P:carbohydrate metabolic process; F:hydrolase activity, hydrolyzing O-glycosyl compounds; F:cation binding	IPR001360; IPR013781; IPR017853; IPR018120; PTHR10353:SF8 (PANTHER)	glycoside hydrolases [Source:VB External Description;Acc:AAEL009236]
AAEL012630-RA	hypothetical protein AaeL_AAEL012630 [Aedes aegypti]	5.05982	up	0.00280139	0.00109214		5.39299	up	0.00186629	0.00090025	0.938222	C:membrane; F:cation transmembrane transporter activity; P:cation transport; P:transmembrane transport	IPR002524; G3DSA:1.20.1510.10 (GENE3D)	cation efflux protein/ zinc transporter [Source:VB External Description;Acc:AAEL008693]
AAEL012837-RA	hypothetical protein AaeL_AAEL012837 [Aedes aegypti]	5.05814	up	0.00152508	0.000467501		6.68117	up	9.31143e-05	1.76656e-05	0.757074	F:metalloendopeptidase activity; P:proteolysis	IPR000718; IPR008753; IPR018497; IPR024079; PTHR11733:SF27 (PANTHER), SSF55486 (SUPERFAMILY)	endothelin-converting enzyme [Source:VB External Description;Acc:AAEL011369]
AAEL011806-RA	glucose dehydrogenase	5.03153	up	0.000257138	1.8535e-05		3.24714	up	5.17821e-05	7.0264e-06	1.54953	F:hydrolase activity, acting on ester bonds; C:nucleus; F:zinc ion binding	IPR015021; PTHR13204 (PANTHER), SSF117856 (SUPERFAMILY)	conserved hypothetical protein [Source:VB External Description;Acc:AAEL015304]
AAEL003951-RA	calpain b	5.02539	up	0.000323407	3.22214e-05		4.74791	up	0.000109619	2.26986e-05	1.05844	-	IPR011021; IPR011022; IPR014756; PTHR11188 (PANTHER), PTHR11188:SF13 (PANTHER)	conserved hypothetical protein [Source:VB External Description;Acc:AAEL008186]
AAEL014421-RA	hypothetical protein AaeL_AAEL014421 [Aedes aegypti]	5.0085	up	0.000135787	2.76926e-06		4.25071	up	0.000179655	4.55989e-05	1.17827	-	no IPS match	hypothetical protein [Source:VB External Description;Acc:AAEL011771]
AAEL012194-RA	cysteine-rich venom	4.98551	up	0.000258792	1.93862e-05		3.37816	up	2.17997e-05	1.53686e-06	1.47581	C:nucleus; F:protein binding; F:FMN binding	IPR009002; IPR012349; PTHR13343 (PANTHER), PTHR13343:SF4 (PANTHER)	conserved hypothetical protein [Source:VB External Description;Acc:AAEL005401]
AAEL004242-RA	juvenile hormone-inducible	4.95937	up	0.000504007	7.78128e-05		5.04652	up	1.19097e-05	4.66323e-07	0.982731	F:protein kinase activity; P:cellular metabolic process; F:nucleotide binding	no IPS match	conserved hypothetical protein [Source:VB External Description;Acc:AAEL012613]
AAEL006971-RA	hypothetical protein AaeL_AAEL006971 [Aedes aegypti]	4.91778	up	7.36179e-05	5.99657e-08		3.13305	up	0.00107794	0.000459912	1.56965	-	no IPS match	conserved hypothetical protein [Source:VB External Description;Acc:AAEL013446]
AAEL001963-RA	protein serine threonine	4.91164	up	0.00229806	0.000828297		6.31244	up	0.0023525	0.0011762	0.77809	P:axon guidance; P:ER-associated protein catabolic process; C:nucleoplasm; F:transcription regulator activity; P:positive regulation of transcription; F:protein binding; P:regulation of synaptic plasticity; P:induction of apoptosis by extracellular signals; P:anti-apoptosis; P:positive regulation of ubiquitin-protein ligase activity during mitotic cell cycle; F:structural constituent of ribosome;…	IPR000626; IPR019954; IPR019955; IPR019956; G3DSA:3.10.20.90 (GENE3D), PTHR10666 (PANTHER), SSF54236 (SUPERFAMILY)	ubiquitin [Source:VB External Description;Acc:AAEL000795]
AAEL008534-RA	---NA---	4.89143	up	0.000323407	3.20311e-05		3.23393	up	0.000736881	0.000288809	1.51253	F:molecular_function; C:cellular_component	seg (SEG)	conserved hypothetical protein [Source:VB External Description;Acc:AAEL005428]
AAEL010287-RA	zn840_human ame: full= zinc finger protein 840	4.87347	up	0.000301821	2.66243e-05		4.78403	up	2.36122e-05	1.83346e-06	1.01869	P:regulation of transcription from RNA polymerase II promoter; P:transcription initiation from RNA polymerase II promoter; F:cyclin-dependent protein kinase regulator activity; C:nuclear cyclin-dependent protein kinase holoenzyme complex; F:RNA polymerase II transcription mediator activity; F:protein binding; P:G1/S transition of mitotic cell cycle; C:mediator complex; C:membrane	IPR003492; IPR016196; IPR018460; G3DSA:1.20.1250.20 (GENE3D)	cln3/battenin [Source:VB External Description;Acc:AAEL009909]
AAEL009038-RA	thymus-specific serine protease	4.83119	up	0.000893059	0.000206371		4.43423	up	2.16902e-05	1.52091e-06	1.08952	F:heme binding; P:oxidation reduction; F:monooxygenase activity; F:electron carrier activity	IPR001128; IPR002401; IPR017972; PTHR24292 (PANTHER), PTHR24292:SF175 (PANTHER), seg (SEG), SignalP-NN(euk) (SIGNALP), tmhmm (TMHMM)	cytochrome P450 [Source:VB External Description;Acc:AAEL006811]
AAEL004409-RA	protein yellow	4.81509	up	9.70551e-05	5.94554e-07		4.29629	up	7.80408e-05	1.33603e-05	1.12076	C:extracellular region; F:chitin binding; P:chitin metabolic process	IPR002557; PTHR23301 (PANTHER)	conserved hypothetical protein [Source:VB External Description;Acc:AAEL002619]
AAEL003799-RA	autophagy-specific gene 2	4.80969	up	0.000381608	4.51178e-05		3.82458	up	1.82266e-05	1.05123e-06	1.25757	F:heme binding; P:oxidation reduction; F:monooxygenase activity; F:electron carrier activity	IPR001128; IPR002401; IPR017972; PTHR24303 (PANTHER), PTHR24303:SF60 (PANTHER)	cytochrome P450 [Source:VB External Description;Acc:AAEL014411]
AAEL002229-RA	cuticle protein	4.79575	up	0.000318889	2.99402e-05		3.75972	up	1.92065e-05	1.16719e-06	1.27556	F:binding; C:mitochondrial inner membrane; P:phosphate transport; C:lipid particle; F:phosphate transmembrane transporter activity; P:transmembrane transport; P:wing disc dorsal/ventral pattern formation; C:integral to membrane	IPR018108; IPR023395; PTHR24089 (PANTHER), PTHR24089:SF22 (PANTHER), seg (SEG)	mitochondrial phosphate carrier protein [Source:VB External Description;Acc:AAEL011195]
AAEL007648-RA	hypothetical protein AaeL_AAEL007648 [Aedes aegypti]	4.77191	up	0.000587764	0.000104058		6.91682	up	0.000928243	0.000382556	0.6899	F:molecular_function; C:cellular_component; F:peptidase activity; P:defense response to bacterium	SignalP-NN(euk) (SIGNALP)	conserved hypothetical protein [Source:VB External Description;Acc:AAEL007834]
AAEL014441-RA	juvenile hormone-inducible	4.74631	up	0.000224314	1.26315e-05		4.22273	up	0.000184774	4.72498e-05	1.12399	-	seg (SEG), SignalP-NN(euk) (SIGNALP)	hypothetical protein [Source:VB External Description;Acc:AAEL001351]
AAEL008138-RA	abc transporter	4.73245	up	0.000791116	0.000171981		4.83849	up	6.7953e-05	1.09034e-05	0.978084	F:carbon-nitrogen ligase activity, with glutamine as amido-N-donor	IPR000120; IPR023631; PTHR11895:SF5 (PANTHER)	amidase [Source:VB External Description;Acc:AAEL006181]
AAEL003160-RA	dna-binding nuclear protein p8	4.73005	up	0.000568305	9.71785e-05		4.95072	up	8.58924e-06	2.56747e-07	0.955427	P:associative learning	seg (SEG)	pigeon protein (linotte protein) [Source:VB External Description;Acc:AAEL000315]
AAEL011109-RA	cation proton antiporter	4.71605	up	0.000161405	4.93955e-06		4.08086	up	2.05712e-05	1.3794e-06	1.15565	C:extracellular region; F:chitin binding; P:chitin metabolic process	IPR002557	conserved hypothetical protein [Source:VB External Description;Acc:AAEL002611]
AAEL002241-RA	cuticle protein	4.70539	up	0.00026652	2.07147e-05		3.66942	up	4.0489e-05	4.74204e-06	1.28232	C:extracellular region; F:chitinase activity; F:chitin binding; F:cation binding; P:chitin catabolic process	IPR001223; IPR001579; IPR002557; IPR011583; IPR013781; IPR017853; G3DSA:3.10.50.10 (GENE3D), PTHR11177 (PANTHER), PTHR11177:SF30 (PANTHER), seg (SEG), SignalP-NN(euk) (SIGNALP), tmhmm (TMHMM), SSF54556 (SUPERFAMILY)	brain chitinase and chia [Source:VB External Description;Acc:AAEL002972]
AAEL002005-RA	cytochrome p450 CYP12F6	4.68602	up	7.78397e-05	3.67545e-07		5.24204	up	4.42531e-05	5.46257e-06	0.89393	-	no IPS match	hypothetical protein [Source:VB External Description;Acc:AAEL000615]
AAEL003821-RA	hypothetical protein AaeL_AAEL003821 [Aedes aegypti]	4.67978	up	0.000327553	3.29479e-05		5.04189	up	0.00104239	0.000442372	0.928181	-	IPR002110; IPR020683; PF12796 (PFAM)	conserved hypothetical protein [Source:VB External Description;Acc:AAEL003737]
AAEL006446-RA	trehalose-6-phosphate synthase 1	4.67303	up	0.000209389	1.06721e-05		3.06514	up	3.26654e-05	3.27273e-06	1.52457	-	no IPS match	conserved hypothetical protein [Source:VB External Description;Acc:AAEL010263]
AAEL011296-RA	salivary secreted peptide	4.67022	up	0.000129789	2.17094e-06		4.31267	up	1.82393e-05	1.06002e-06	1.08291	-	no IPS match	NBP2b protein, putative [Source:VB External Description;Acc:AAEL002375]
AAEL008935-RA	cg3588	4.65656	up	0.000258792	1.94016e-05		4.03357	up	5.01089e-05	6.66641e-06	1.15445	F:molecular_function; C:cellular_component	seg (SEG), SignalP-NN(euk) (SIGNALP)	conserved hypothetical protein [Source:VB External Description;Acc:AAEL012296]
AAEL010108-RA	sex-determining protein fem-1	4.65386	up	0.0020001	0.000682219		6.25353	up	0.00101964	0.000429498	0.744196	F:protein binding	IPR001611; IPR003591; G3DSA:3.80.10.10 (GENE3D), PTHR24365 (PANTHER), PF12799 (PFAM), SSF52058 (SUPERFAMILY)	conserved hypothetical protein [Source:VB External Description;Acc:AAEL012722]
AAEL008444-RA	salivary secreted peptide	4.63172	up	0.000248994	1.68701e-05		4.24512	up	4.22824e-05	5.05181e-06	1.09107	C:intracellular; F:acid-amino acid ligase activity; F:protein binding; P:protein modification process	no IPS match	conserved hypothetical protein [Source:VB External Description;Acc:AAEL008365]
AAEL002181-RA	cuticle protein	4.62661	up	0.00643521	0.00315138		5.39868	up	2.94808e-05	2.72604e-06	0.856989	F:calcium ion binding	seg (SEG)	conserved hypothetical protein [Source:VB External Description;Acc:AAEL010116]
AAEL014612-RA	cytochrome p450	4.62243	up	0.000129789	2.29398e-06		4.88075	up	2.13908e-05	1.49052e-06	0.947073	P:protein folding; F:peptidyl-prolyl cis-trans isomerase activity; F:binding	seg (SEG), tmhmm (TMHMM)	fk506 binding protein [Source:VB External Description;Acc:AAEL012272]
AAEL005787-RA	serine protease 14	4.60616	up	0.000222396	1.24795e-05		4.58445	up	0.000128473	2.87132e-05	1.00473	C:membrane; F:bile acid:sodium symporter activity; P:sodium ion transport	IPR002657; PTHR10361:SF9 (PANTHER)	sodium-bile acid cotransporter [Source:VB External Description;Acc:AAEL012440]
AAEL011698-RA	mrna cap guanine-n7 methyltransferase	4.57816	up	0.0014255	0.000425477		3.72116	up	0.000736881	0.000289073	1.2303	P:transmembrane transport	IPR011701; IPR016196; G3DSA:1.20.1250.20 (GENE3D), PTHR24003 (PANTHER), PTHR24003:SF202 (PANTHER)	conserved hypothetical protein [Source:VB External Description;Acc:AAEL013039]
AAEL006491-RA	peroxisomal targeting signal 2 receptor	4.57041	up	0.000153058	4.05054e-06		4.11376	up	1.27445e-05	5.32965e-07	1.11101	-	IPR018629	conserved hypothetical protein [Source:VB External Description;Acc:AAEL007792]
AAEL006113-RB	isoform b	4.55177	up	0.0012458	0.00034419		4.89088	up	0.00047167	0.000165844	0.930664	P:transport; F:water transmembrane transporter activity; C:membrane	IPR016697; IPR023271; PTHR21191 (PANTHER), PTHR21191:SF9 (PANTHER)	aquaporin, putative [Source:VB External Description;Acc:AAEL014108]
AAEL002582-RB	serine protease	4.51624	up	0.000508122	7.91459e-05		3.6208	up	0.000360455	0.000116725	1.24731	-	no IPS match	conserved hypothetical protein [Source:VB External Description;Acc:AAEL000881]
AAEL011888-RA	serine-type	4.49389	up	0.00330974	0.00137344		4.05717	up	0.00112362	0.000483683	1.10764	P:cellular iron ion homeostasis; F:ferric iron binding; C:extracellular region; P:iron ion transport	IPR001156; IPR015560; IPR018195; G3DSA:3.40.190.10 (GENE3D), SSF53850 (SUPERFAMILY)	transferrin [Source:VB External Description;Acc:AAEL015639]
AAEL003443-RA	threonine dehydrogenase	4.47254	up	0.000107618	8.06027e-07		3.40856	up	4.84416e-05	6.30996e-06	1.31215	-	no IPS match	conserved hypothetical protein [Source:VB External Description;Acc:AAEL000921]
AAEL000995-RA	hypothetical protein AaeL_AAEL000995 [Aedes aegypti]	4.47252	up	0.000475275	7.0744e-05		4.84612	up	7.10295e-05	1.16483e-05	0.922907	F:actin binding; P:heart development	IPR000533; G3DSA:1.20.5.340 (GENE3D), PTHR19269 (PANTHER), PTHR19269:SF11 (PANTHER)	tropomyosin invertebrate [Source:VB External Description;Acc:AAEL002759]
AAEL001427-RA	short-chain dehydrogenase	4.4653	up	0.000990457	0.000243125		4.8089	up	9.05492e-05	1.6969e-05	0.928549	C:integral to membrane	IPR000301; IPR008952; IPR018499; PTHR19282 (PANTHER), PTHR19282:SF50 (PANTHER)	platelet endothelial tetraspan antigen 3 (cd151 antigen) [Source:VB External Description;Acc:AAEL005142]
AAEL006323-RA	protease m1 zinc metalloprotease	4.45905	up	0.000641227	0.000120229		3.02829	up	0.00484243	0.00275373	1.47246	C:integral to membrane; P:amino acid transport	IPR013057; PTHR22950 (PANTHER), PTHR22950:SF9 (PANTHER)	amino acid transporter [Source:VB External Description;Acc:AAEL007458]
AAEL008285-RA	pupal cuticle protein	4.43728	up	0.00958933	0.00518447		3.86366	up	0.00438624	0.00245164	1.14847	F:receptor activity	IPR002919; G3DSA:2.10.25.10 (GENE3D), PTHR23259 (PANTHER)	cysteine-rich venom protein, putative [Source:VB External Description;Acc:AAEL012194]
AAEL008703-RA	suppressor of white-apricot	4.43431	up	0.000793628	0.000173661		3.64542	up	2.4463e-05	1.9966e-06	1.2164	F:transferase activity	IPR016181; PTHR20905 (PANTHER)	conserved hypothetical protein [Source:VB External Description;Acc:AAEL012867]
AAEL003008-RA	zinc finger protein 671	4.42646	up	0.000414842	5.3469e-05		3.80278	up	6.16097e-05	9.34848e-06	1.16401	C:extracellular region; F:chitin binding; P:chitin metabolic process	IPR002557; PTHR22933 (PANTHER)	hypothetical protein [Source:VB External Description;Acc:AAEL006201]
AAEL003843-RA	hypothetical protein AaeL_AAEL003843 [Aedes aegypti]	4.42433	up	0.000447137	6.27262e-05		4.20087	up	0.000178548	4.50488e-05	1.05319	F:protein binding	IPR001611; IPR003591; G3DSA:3.80.10.10 (GENE3D), PTHR23155 (PANTHER), PTHR23155:SF92 (PANTHER), PF12799 (PFAM), SSF52058 (SUPERFAMILY)	internalin A, putative [Source:VB External Description;Acc:AAEL005221]
AAEL004863-RA	protein yellow	4.42431	up	0.000210308	1.07447e-05		4.40232	up	0.000179596	4.53839e-05	1.005	F:alpha-mannosidase activity; F:carbohydrate binding; C:lysosome; P:mannose metabolic process; F:zinc ion binding	IPR000602; IPR011013; IPR011330; IPR011682; IPR013780; IPR015341; G3DSA:1.20.1270.50 (GENE3D), G3DSA:2.60.40.1360 (GENE3D), G3DSA:2.70.98.30 (GENE3D), PTHR11607 (PANTHER), PTHR11607:SF3 (PANTHER), SSF88688 (SUPERFAMILY)	lysosomal alpha-mannosidase (mannosidase alpha class 2b member 1) [Source:VB External Description;Acc:AAEL005749]
AAEL001351-RA	possible mucin	4.42417	up	0.000784978	0.000169268		4.21997	up	0.000216337	5.7945e-05	1.04839	F:calcium ion binding	IPR002048; IPR011992; IPR018247; IPR018248; IPR018249; PTHR12294 (PANTHER), PTHR12294:SF2 (PANTHER), SSF47473 (SUPERFAMILY)	conserved hypothetical protein [Source:VB External Description;Acc:AAEL011306]
AAEL014889-RA	nadh:ubiquinone dehydrogenase	4.41092	up	0.000482738	7.2496e-05		3.32715	up	0.000159522	3.85554e-05	1.32573	F:chitinase activity; F:cation binding; P:chitin catabolic process	IPR001223; IPR011583; IPR013781; IPR017853; G3DSA:3.10.50.10 (GENE3D), PTHR11177 (PANTHER), PTHR11177:SF58 (PANTHER), SSF54556 (SUPERFAMILY)	brain chitinase and chia [Source:VB External Description;Acc:AAEL008040]
AAEL002619-RA	peritrophic matrix protein 9	4.40716	up	0.000928894	0.000221927		3.24755	up	0.000266552	7.75239e-05	1.35707	F:structural constituent of cuticle	seg (SEG), SignalP-NN(euk) (SIGNALP)	cuticle protein, putative [Source:VB External Description;Acc:AAEL009791]
AAEL008052-RA	bm8 interacting protein 2d-2	4.394	up	0.000240526	1.50878e-05		4.77479	up	1.70258e-05	9.06599e-07	0.920251	P:metabolic process; F:hydrolase activity	IPR002018; IPR002168; IPR019826; G3DSA:3.40.50.1820 (GENE3D), PTHR11559 (PANTHER), PTHR11559:SF120 (PANTHER), SSF53474 (SUPERFAMILY)
AAEL003697-RA	serpin 17 inhibitory serine protease inhibitor	4.37451	up	7.36179e-05	2.39717e-07		4.12073	up	2.61748e-05	2.24545e-06	1.06159	C:extracellular region; F:calcium ion binding; F:phospholipase A2 activity; P:phospholipid metabolic process; P:lipid catabolic process	IPR001211; IPR013090; IPR016090; PTHR12253:SF5 (PANTHER)	hypothetical protein [Source:VB External Description;Acc:AAEL001528]
AAEL015485-RA	seven in	4.36901	up	0.000446335	6.25591e-05		4.36601	up	0.000325412	0.000101714	1.00069	-	SignalP-NN(euk) (SIGNALP)	hypothetical protein [Source:VB External Description;Acc:AAEL002807]
AAEL011638-RA	cyclic-nucleotide-gated cation channel	4.36894	up	0.000849359	0.000191267		4.62695	up	0.000381853	0.000125773	0.944237	-	IPR006596; IPR011989; IPR014881; PTHR12814 (PANTHER), SSF144206 (SUPERFAMILY)	conserved hypothetical protein [Source:VB External Description;Acc:AAEL005628]
AAEL008907-RA	isoform a	4.36605	up	0.000582169	0.00010214		4.31546	up	4.33113e-05	5.2477e-06	1.01172	-	IPR004119; IPR011009; IPR015897; G3DSA:3.90.1200.10 (GENE3D), PTHR11012 (PANTHER)	conserved hypothetical protein [Source:VB External Description;Acc:AAEL006190]
AAEL003899-RA	sugar transporter	4.36309	up	0.00256794	0.000967148		5.30671	up	0.000196229	5.1112e-05	0.822183	F:nucleic acid binding; C:intracellular; F:zinc ion binding	IPR007087; IPR013087; IPR015880; PTHR11389 (PANTHER), SSF57667 (SUPERFAMILY)	conserved hypothetical protein [Source:VB External Description;Acc:AAEL010302]
AAEL014171-RA	hypothetical protein AaeL_AAEL014171 [Aedes aegypti]	4.34317	up	0.000299422	2.62252e-05		4.07673	up	6.39307e-05	9.91687e-06	1.06536	-	seg (SEG)	conserved hypothetical protein [Source:VB External Description;Acc:AAEL006420]
AAEL013937-RA	NOT ON VECTORBASE	4.31279	up	0.000290404	2.47993e-05		4.2711	up	2.13376e-05	1.48271e-06	1.00976	P:amino acid transport	IPR005282; IPR006603; PTHR13131 (PANTHER), PTHR13131:SF5 (PANTHER), PF04193 (PFAM)	cystinosin [Source:VB External Description;Acc:AAEL006113]
AAEL008473-RA	cysteine-rich secretory protein-	4.31184	up	0.00380197	0.0016288		3.27677	up	0.00497884	0.00284451	1.31588	C:intracellular; P:transport; F:transporter activity	IPR001071; IPR001251; IPR011074; G3DSA:1.10.8.20 (GENE3D), PTHR10174 (PANTHER), PTHR10174:SF38 (PANTHER)	CRAL/TRIO domain-containing protein [Source:VB External Description;Acc:AAEL001318]
AAEL013199-RA	-like protein subfamily b member 12	4.2961	up	0.000383829	4.6058e-05		4.31321	up	3.4203e-05	3.53482e-06	0.996033	P:transmembrane transport; C:integral to membrane	IPR004481; IPR004837; PTHR10846 (PANTHER), PTHR10846:SF23 (PANTHER)	potassium-dependent sodium-calcium exchanger, putative [Source:VB External Description;Acc:AAEL004805]
AAEL008898-RA	sulfotransferase	4.28121	up	0.000320912	3.11177e-05		5.32867	up	6.56542e-05	1.04931e-05	0.803429	F:signal transducer activity	IPR000342; IPR003114; IPR016137; PTHR22775 (PANTHER), PTHR22775:SF3 (PANTHER), PS51257 (PROFILE)	hypothetical protein [Source:VB External Description;Acc:AAEL007062]
AAEL004704-RA	map kinase-interacting serine threonine kinase	4.26719	up	0.00133573	0.000385457		3.27532	up	0.0010585	0.00045068	1.30283	F:structural constituent of chitin-based larval cuticle; C:lysosome; P:protein catabolic process; P:salivary gland cell autophagic cell death; F:cysteine-type endopeptidase activity; P:proteolysis	IPR000169; IPR000668; IPR013128; IPR013201; G3DSA:3.90.70.10 (GENE3D), PTHR12411:SF57 (PANTHER), SSF54001 (SUPERFAMILY)	cathepsin l [Source:VB External Description;Acc:AAEL002833]
AAEL006097-RA	carboxylesterase	4.2603	up	0.000699482	0.000139231		2.51859	up	3.2476e-05	3.24138e-06	1.69154	-	no IPS match	conserved hypothetical protein [Source:VB External Description;Acc:AAEL002189]
AAEL007792-RA	hypothetical protein AaeL_AAEL007792 [Aedes aegypti]	4.245	up	0.00213946	0.000752122		4.23213	up	0.000266808	7.7694e-05	1.00304	F:heat shock protein binding	IPR001623; IPR003095; IPR018961; PTHR24016 (PANTHER), PTHR24016:SF20 (PANTHER)	conserved hypothetical protein [Source:VB External Description;Acc:AAEL014735]
AAEL003278-RA	cg17111 cg17111-pa	4.23821	up	0.000284816	2.37507e-05		3.4879	up	7.93048e-06	2.12517e-07	1.21512	F:RNA binding; C:cytoplasm; P:posttranscriptional gene silencing by RNA	IPR003100; IPR003165; IPR012337; G3DSA:2.170.260.10 (GENE3D), PTHR22892 (PANTHER), PTHR22892:SF7 (PANTHER)	PIWI [Source:VB External Description;Acc:AAEL007823]
AAEL008866-RA	pupal cuticle protein	4.23604	up	0.000344404	3.67147e-05		5.96798	up	0.00168168	0.000793352	0.709795	C:intracellular; F:GTP binding; P:small GTPase mediated signal transduction	IPR005225; IPR006687; IPR006689; IPR024156; G3DSA:3.40.50.300 (GENE3D), PTHR11711:SF31 (PANTHER), SignalP-NN(euk) (SIGNALP), SSF52540 (SUPERFAMILY)	ADP-ribosylation factor, arf [Source:VB External Description;Acc:AAEL013761]
AAEL015639-RA	transferrin precursor	4.22618	up	0.000184055	7.77984e-06		4.43431	up	0.000298753	9.10946e-05	0.953063	F:actin binding; C:intracellular	IPR000108; IPR001452; G3DSA:2.30.30.40 (GENE3D), PTHR10661 (PANTHER), PTHR10661:SF23 (PANTHER)	hypothetical protein [Source:VB External Description;Acc:AAEL011133]
AAEL005006-RA	cytochrome p450	4.2234	up	0.00110297	0.000285676		3.99282	up	0.00117638	0.000514607	1.05775	P:cGMP biosynthetic process; F:receptor activity; P:intracellular signaling pathway; F:heme binding; F:guanylate cyclase activity; F:nucleotide binding	IPR001054; IPR011644; IPR011645; IPR018297; IPR024096; G3DSA:3.90.1520.10 (GENE3D), PTHR11920 (PANTHER), PTHR11920:SF27 (PANTHER)	guanylate cyclase [Source:VB External Description;Acc:AAEL013026]
AAEL001020-RA	anterior fat body protein	4.22218	up	0.00486516	0.00223468		6.21896	up	0.000186049	4.76934e-05	0.678921	F:zinc ion binding; F:protein binding	IPR001841; IPR002083; IPR008974; IPR013083; IPR013322; SSF57850 (SUPERFAMILY)	hypothetical protein [Source:VB External Description;Acc:AAEL006156]
AAEL007562-RA	isoform a	4.21706	up	0.000271388	2.14463e-05		3.10587	up	0.000990639	0.000414153	1.35777	-	seg (SEG)	hypothetical protein [Source:VB External Description;Acc:AAEL004292]
AAEL009246-RA	lactase-phlorizin hydrolase	4.21694	up	0.000711632	0.000143425		5.02869	up	0.000402371	0.000134695	0.838575	P:positive regulation of gene-specific transcription from RNA polymerase II promoter; F:zinc ion binding; F:promoter binding; F:transcription factor activity; C:nucleus	IPR000679; IPR013088; PTHR10071 (PANTHER), SSF57716 (SUPERFAMILY)	transcription factor GATA-4 (GATA binding factor-4) [Source:VB External Description;Acc:AAEL010224]
AAEL013434-RA	sptzle 1b	4.20183	up	0.000227999	1.30732e-05		4.07863	up	1.45223e-05	7.00887e-07	1.03021	C:intracellular; P:transport; F:transporter activity	IPR001071; IPR001251; IPR008273; IPR011074; G3DSA:1.10.8.20 (GENE3D), PTHR10174 (PANTHER), PTHR10174:SF28 (PANTHER)	conserved hypothetical protein [Source:VB External Description;Acc:AAEL007997]
AAEL011451-RA	lethal malignant blood isoform c	4.19379	up	0.000345399	3.69012e-05		4.12033	up	0.000164871	4.03688e-05	1.01783	-	IPR007651; IPR013209; IPR023214; PTHR12181 (PANTHER), PTHR12181:SF8 (PANTHER)	lipin [Source:VB External Description;Acc:AAEL005175]
AAEL013434-RB	sptzle 1b	4.18476	up	0.00015058	3.76357e-06		3.86463	up	2.05712e-05	1.37323e-06	1.08283	F:heme binding; P:oxidation reduction; F:monooxygenase activity; F:electron carrier activity	IPR001128; IPR002403; IPR017972; PTHR24305 (PANTHER), PTHR24305:SF95 (PANTHER), seg (SEG)	cytochrome P450 [Source:VB External Description;Acc:AAEL002031]
AAEL009483-RA	isoform a	4.17419	up	0.000822539	0.00018296		4.08345	up	0.000256052	7.3629e-05	1.02222	F:molecular_function; C:cellular_component	IPR004142; G3DSA:3.40.50.1820 (GENE3D), SSF53474 (SUPERFAMILY)	n-myc downstream regulated [Source:VB External Description;Acc:AAEL004307]
AAEL010685-RA	cg4734 protein	4.16927	up	0.000224314	1.2642e-05		3.63934	up	8.06343e-05	1.40638e-05	1.14561	P:Ras protein signal transduction; P:gastrulation; F:protein serine/threonine kinase activity; P:metamorphosis; P:spermatogenesis; P:response to bacterium; P:torso signaling pathway; F:diacylglycerol binding; P:signal transduction; P:terminal region determination; P:ovarian follicle cell development; C:cytoplasm; C:extrinsic to plasma membrane; P:protein amino acid phosphorylation	seg (SEG), SignalP-NN(euk) (SIGNALP)	protein serine/threonine kinase, putative [Source:VB External Description;Acc:AAEL001963]
AAEL012757-RA	kynurenine 3-monooxygenase	4.16529	up	0.00038151	4.48312e-05		2.71757	up	0.000544653	0.000197837	1.53272	C:nucleus; F:protein binding; F:transcription repressor activity; F:FMN binding	IPR009002; IPR012349; PTHR13343 (PANTHER), PTHR13343:SF4 (PANTHER)	conserved hypothetical protein [Source:VB External Description;Acc:AAEL005401]
AAEL008410-RA	helix-loop-helix transcription factor	4.15807	up	0.00024892	1.67361e-05		2.81097	up	0.000909887	0.000373151	1.47923	F:heme binding; P:oxidation reduction; F:monooxygenase activity; F:electron carrier activity	IPR001128; IPR002401; IPR017972; PTHR24290 (PANTHER), SignalP-NN(euk) (SIGNALP)	cytochrome P450 [Source:VB External Description;Acc:AAEL003380]
AAEL006905-RA	isoform a	4.14138	up	0.000865142	0.000196941		3.37255	up	0.00116521	0.000507451	1.22797	F:kinase activity	IPR001810; IPR022364; G3DSA:3.80.10.10 (GENE3D), PTHR23125 (PANTHER), PTHR23125:SF34 (PANTHER), PF12937 (PFAM), SSF52047 (SUPERFAMILY)	S-phase kinase-associated protein 2 (skp2), putative [Source:VB External Description;Acc:AAEL005068]
AAEL001687-RA	adenylate cyclase	4.13488	up	0.000944436	0.000227951		3.19055	up	4.45541e-06	5.30387e-08	1.29598	P:transmembrane transport	IPR011701; IPR016196; IPR020846; G3DSA:1.20.1250.20 (GENE3D), PTHR24003 (PANTHER), PTHR24003:SF204 (PANTHER)	cis,cis-muconate transport protein MucK, putative [Source:VB External Description;Acc:AAEL011470]
AAEL008373-RA	isoform b	4.12894	up	0.00154848	0.00047733		3.93377	up	0.000112184	2.35282e-05	1.04962	F:heme binding; P:oxidation reduction; F:monooxygenase activity; F:electron carrier activity	seg (SEG)	cytochrome P450 [Source:VB External Description;Acc:AAEL014605]
AAEL004809-RA	kda salivary protein	4.12273	up	0.001448	0.000434647		3.46198	up	5.3358e-05	7.36832e-06	1.19086	-	no IPS match	hypothetical protein [Source:VB External Description;Acc:AAEL004197]
AAEL004684-RA	uncharacterized conserved protein	4.11883	up	0.000355183	3.8949e-05		4.85455	up	8.32741e-05	1.49395e-05	0.848448	-	PTHR18806 (PANTHER), PTHR18806:SF3 (PANTHER)	conserved hypothetical protein [Source:VB External Description;Acc:AAEL003078]
AAEL008096-RA	mitochondrial ornithine transporter	4.11487	up	0.000120555	1.34223e-06		3.21347	up	3.24317e-05	3.21244e-06	1.28051	F:pyridoxal phosphate binding; P:carboxylic acid metabolic process; F:carboxy-lyase activity	IPR002129; IPR015421; IPR015422; IPR015424; IPR021115; PTHR11999:SF13 (PANTHER)	glutamate decarboxylase [Source:VB External Description;Acc:AAEL001902]
AAEL005823-RA	serine protease snake	4.11349	up	0.000112781	1.04318e-06		3.34666	up	0.000533083	0.000192422	1.22913	F:oxidoreductase activity; C:peroxisome; P:ether lipid biosynthetic process; F:FAD binding	IPR004113; IPR006094; IPR016164; IPR016166; IPR016167; IPR016168; IPR016171; PTHR11748 (PANTHER), PTHR11748:SF3 (PANTHER)	alkyldihydroxyacetonephosphate synthase [Source:VB External Description;Acc:AAEL007793]
AAEL014904-RA	dead box atp-dependent rna helicase	4.09934	up	0.000239944	1.44343e-05		2.94924	up	2.07265e-05	1.39835e-06	1.38997	F:molecular_function; C:cellular_component; P:biological_process	no IPS match	conserved hypothetical protein [Source:VB External Description;Acc:AAEL002777]
AAEL014608-RA	cytochrome p450	4.09689	up	0.000127342	1.88781e-06		3.93711	up	0.000272195	8.00746e-05	1.04058	P:fatty acid biosynthetic process; C:integral to membrane; P:oxidation reduction; F:oxidoreductase activity, acting on paired donors, with oxidation of a pair of donors resulting in the reduction of molecular oxygen to two molecules of water	IPR005804; IPR015876; PTHR11351 (PANTHER)	delta(9)-desaturase, putative [Source:VB External Description;Acc:AAEL003622]
AAEL002124-RA	serine protease	4.094	up	0.00142089	0.000423217		2.63373	up	0.000643684	0.000244624	1.55445	F:structural constituent of cuticle	IPR000618; PTHR10380 (PANTHER)	conserved hypothetical protein [Source:VB External Description;Acc:AAEL002725]
AAEL013895-RA	kda salivary protein	4.0871	up	0.00138839	0.00040672		3.49804	up	5.83266e-05	8.5924e-06	1.1684	F:molecular_function; P:biological_process	no IPS match	conserved hypothetical protein [Source:VB External Description;Acc:AAEL008793]
AAEL010557-RA	transcription factor 15-like	4.08615	up	0.000467282	6.84148e-05		3.34061	up	2.04726e-05	1.35217e-06	1.22317	C:intracellular; P:transport; F:retinal binding; F:transporter activity	IPR001071; IPR001251; IPR011074; G3DSA:1.10.8.20 (GENE3D), PTHR10174 (PANTHER), PTHR10174:SF38 (PANTHER)	CRAL/TRIO domain-containing protein [Source:VB External Description;Acc:AAEL001308]
AAEL005100-RA	hypothetical protein AaeL_AAEL005100 [Aedes aegypti]	4.06441	up	0.00127196	0.000355159		4.59621	up	0.000360162	0.00011649	0.884297	P:metabolic process; F:alkaline phosphatase activity	IPR001952; IPR017849; IPR017850; IPR018299; PTHR11596 (PANTHER), PTHR11596:SF11 (PANTHER), seg (SEG), SignalP-NN(euk) (SIGNALP), tmhmm (TMHMM)	alkaline phosphatase [Source:VB External Description;Acc:AAEL003298]
AAEL011729-RA	molybdenum cofactor sulfurase	4.06414	up	0.000311172	2.8784e-05		3.7509	up	8.06962e-05	1.41409e-05	1.08351	-	PTHR13628 (PANTHER)	conserved hypothetical protein [Source:VB External Description;Acc:AAEL004662]
AAEL007948-RA	glutathione-s-transferase gst	4.05926	up	0.000579124	0.000101285		5.46095	up	4.87807e-06	6.27908e-08	0.743325	-	no IPS match	Ofd1 protein, putative [Source:VB External Description;Acc:AAEL012556]
AAEL013086-RA	zinc finger protein ckr1	4.04513	up	0.000493893	7.48979e-05		3.48566	up	0.000311275	9.60765e-05	1.1605	C:extracellular region; F:chitin binding; P:chitin metabolic process	IPR002557; PTHR23301 (PANTHER)	conserved hypothetical protein [Source:VB External Description;Acc:AAEL011333]
AAEL001807-RA	cytochrome p450 CYP9M9	4.03148	up	0.00347563	0.00145719		2.86255	up	8.49807e-05	1.53964e-05	1.40835	-	seg (SEG), SignalP-NN(euk) (SIGNALP), tmhmm (TMHMM)	hypothetical protein [Source:VB External Description;Acc:AAEL003816]
AAEL002292-RA	glucose transport	4.01029	up	0.000757997	0.000160663		2.90627	up	0.00031715	9.84908e-05	1.37987	F:sphingomyelin phosphodiesterase activity; P:sphingomyelin catabolic process	no IPS match	sphingomyelin phosphodiesterase [Source:VB External Description;Acc:AAEL003402]
AAEL008365-RA	e3 ubiquitin-protein ligase nedd-4	4.00223	up	0.000367308	4.14021e-05		3.32669	up	0.000404095	0.000135345	1.20307	F:heme binding; P:oxidation reduction; F:monooxygenase activity; F:electron carrier activity	IPR001128; IPR002401; IPR017972; PTHR24305 (PANTHER), PTHR24305:SF164 (PANTHER)	cytochrome P450 [Source:VB External Description;Acc:AAEL010154]
AAEL009291-RA	retinoid-inducible serine carboxypeptidase (serine carboxypeptidase	3.99547	up	0.00978032	0.00531435		4.38048	up	0.000185553	4.75427e-05	0.912108	P:glutamate biosynthetic process; F:pyridoxal phosphate binding; F:L-aspartate:2-oxoglutarate aminotransferase activity; C:mitochondrial matrix; P:aspartate metabolic process	IPR000796; IPR004838; IPR004839; IPR015421; IPR015424	aspartate aminotransferase [Source:VB External Description;Acc:AAEL012579]
AAEL000271-RB	gamma-glutamyl hydrolase	3.99494	up	0.00014483	3.33595e-06		4.3146	up	8.15455e-06	2.26658e-07	0.925912	F:actin binding; P:heart development	IPR000533; G3DSA:1.20.5.340 (GENE3D), PTHR19269 (PANTHER), PTHR19269:SF11 (PANTHER)	tropomyosin invertebrate [Source:VB External Description;Acc:AAEL002759]
AAEL009330-RA	carbonic anhydrase	3.9934	up	0.000287612	2.42749e-05		3.67789	up	8.83128e-05	1.63195e-05	1.08579	P:transmembrane transport; C:integral to membrane; F:binding	IPR018108; IPR023395; PTHR24089 (PANTHER), PTHR24089:SF53 (PANTHER)	mitochondrial ornithine transporter [Source:VB External Description;Acc:AAEL013630]
AAEL006811-RA	cytochrome p450 CYP9J8	3.92662	up	0.000129789	2.1813e-06		3.9024	up	0.000257084	7.39584e-05	1.00621	C:Z disc; P:flight behavior; P:cytoskeletal anchoring at plasma membrane; C:focal adhesion; F:calcium ion binding; P:actin cytoskeleton reorganization; F:actin filament binding; P:actin filament bundle assembly	IPR001589; IPR001715; IPR002017; IPR002048; IPR011992; IPR014837; IPR018159; IPR018247; IPR018249; G3DSA:1.20.58.60 (GENE3D), PTHR25069 (PANTHER), PTHR25069:SF91 (PANTHER), SSF46966 (SUPERFAMILY), SSF47473 (SUPERFAMILY)	alpha-actinin [Source:VB External Description;Acc:AAEL007306]
AAEL001960-RA	cytochrome p450	3.89958	up	0.000147572	3.54374e-06		4.70573	up	4.50564e-05	5.64511e-06	0.828687	C:membrane	seg (SEG), SignalP-NN(euk) (SIGNALP)	conserved hypothetical protein [Source:VB External Description;Acc:AAEL002163]
AAEL013574-RA	apolipoprotein d	3.89565	up	0.000310098	2.85706e-05		3.3335	up	1.16584e-05	4.50544e-07	1.16864	C:intracellular; P:transport; F:transporter activity	tmhmm (TMHMM)	conserved hypothetical protein [Source:VB External Description;Acc:AAEL009032]
AAEL007551-RA	vacuolar protein sorting-associated protein (vps13d) [Source:VB External Description;Acc:AAEL007551]	3.86752	up	0.000552441	9.34723e-05		2.75689	up	0.000414846	0.000140309	1.40285	-	no IPS match	conserved hypothetical protein [Source:VB External Description;Acc:AAEL000916]
AAEL005531-RA	venom allergen	3.86478	up	0.000297721	2.57524e-05		2.84608	up	0.000399814	0.000133356	1.35793	C:intracellular; P:transport; F:retinal binding; F:transporter activity	IPR001071; IPR001251; IPR008273; IPR011074; G3DSA:1.10.8.20 (GENE3D), PTHR23324 (PANTHER), PTHR23324:SF14 (PANTHER)	CRAL/TRIO domain-containing protein [Source:VB External Description;Acc:AAEL010337]
AAEL001446-RA	testis-specific protein pbs13 (t-complex 11 )	3.85916	up	0.000588518	0.000104472		3.94564	up	0.000347708	0.0001111	0.978082	F:glutathione transferase activity	IPR004045; IPR004046; IPR010987; IPR012336; IPR017933; PTHR11260 (PANTHER), PTHR11260:SF37 (PANTHER)	glutathionetransferase [Source:VB External Description;Acc:AAEL007951]
AAEL004451-RA	organic cation transporter	3.85751	up	0.00113434	0.000298247		5.98783	up	7.62971e-05	1.29748e-05	0.644224	-	no IPS match	hypothetical protein [Source:VB External Description;Acc:AAEL011936]
AAEL008494-RA	mitochondrial carnitine acylcarnitine carrier protein	3.84038	up	0.00019514	9.06125e-06		3.04142	up	8.35681e-05	1.5056e-05	1.26269	F:molecular_function; C:cellular_component	no IPS match	conserved hypothetical protein [Source:VB External Description;Acc:AAEL002263]
AAEL013447-RA	hypothetical protein AaeL_AAEL013447 [Aedes aegypti]	3.81225	up	0.000328366	3.31534e-05		3.33744	up	3.4569e-05	3.61424e-06	1.14227	F:carboxypeptidase activity; F:serine-type peptidase activity; P:proteolysis	no IPS match	prolylcarboxypeptidase, putative [Source:VB External Description;Acc:AAEL009038]
AAEL008364-RA	serpin b6	3.79192	up	0.000641227	0.000120007		3.89713	up	7.65432e-06	1.6374e-07	0.973003	P:tricarboxylic acid cycle; F:malate synthase activity; P:glyoxylate cycle	IPR001465; IPR011076; G3DSA:1.20.1220.12 (GENE3D), G3DSA:3.20.20.360 (GENE3D), PTHR21631 (PANTHER), seg (SEG)	malate synthase [Source:VB External Description;Acc:AAEL015315]
AAEL003864-RA	hypothetical conserved protein	3.79109	up	0.00687231	0.00342184		4.10798	up	0.000147519	3.48716e-05	0.922859	-	IPR001007	conserved hypothetical protein [Source:VB External Description;Acc:AAEL008274]
AAEL002018-RA	hypothetical protein AaeL_AAEL002018 [Aedes aegypti]	3.78178	up	0.000493893	7.5155e-05		4.09484	up	9.96702e-05	1.96375e-05	0.923548	-	no IPS match	conserved hypothetical protein [Source:VB External Description;Acc:AAEL010724]
AAEL002585-RA	serine protease	3.76964	up	8.15508e-05	4.3092e-07		3.02547	up	4.6332e-05	5.96678e-06	1.24597	F:ligase activity; P:metabolic process	IPR000873; G3DSA:2.30.38.10 (GENE3D), G3DSA:3.30.300.30 (GENE3D), G3DSA:3.40.50.980 (GENE3D), PTHR24096 (PANTHER), PTHR24096:SF38 (PANTHER), SSF56801 (SUPERFAMILY)	AMP dependent ligase [Source:VB External Description;Acc:AAEL002668]
AAEL013630-RA	mitochondrial ornithine transporter	3.76322	up	0.000134638	2.57812e-06		3.22329	up	7.65432e-06	1.753e-07	1.16751	F:serine-type endopeptidase activity; P:proteolysis	IPR001254; IPR001314; IPR006604; IPR009003; IPR018114; IPR022700; G3DSA:2.40.10.10 (GENE3D), PTHR24260 (PANTHER), PTHR24260:SF176 (PANTHER)	Clip-domain serine protease, family B [Source:VB External Description;Acc:AAEL000037]
AAEL001964-RA	protein serine threonine	3.76315	up	0.000749365	0.000157114		3.45339	up	0.000158408	3.82061e-05	1.0897	P:one-carbon metabolic process; F:zinc ion binding; F:carbonate dehydratase activity	IPR001148; IPR018338; IPR018424; IPR023561	carbonic anhydrase II, putative [Source:VB External Description;Acc:AAEL009330]
AAEL004972-RA	isoform i	3.75803	up	0.000318889	2.99015e-05		2.9401	up	0.000419855	0.000142427	1.2782	F:ligase activity; P:metabolic process	IPR000873; IPR020845; G3DSA:2.30.38.10 (GENE3D), G3DSA:3.30.300.30 (GENE3D), G3DSA:3.40.50.980 (GENE3D), PTHR24096 (PANTHER), PTHR24096:SF38 (PANTHER), SSF56801 (SUPERFAMILY)	AMP dependent ligase [Source:VB External Description;Acc:AAEL012430]
AAEL000227-RA	epithelial membrane protein	3.74892	up	0.000374588	4.27733e-05		3.1459	up	5.5972e-05	7.9556e-06	1.19169	P:transcription; F:DNA-directed RNA polymerase activity; F:DNA binding	IPR002092; IPR002885; IPR024075; G3DSA:1.10.1320.10 (GENE3D), G3DSA:1.10.150.20 (GENE3D), G3DSA:1.10.287.280 (GENE3D), G3DSA:3.30.70.370 (GENE3D), SSF56672 (SUPERFAMILY)	conserved hypothetical protein [Source:VB External Description;Acc:AAEL001847]
AAEL004662-RA	hypothetical conserved protein	3.74147	up	0.000220141	1.20977e-05		3.42743	up	7.61621e-05	1.28861e-05	1.09163	F:heme binding; P:oxidation reduction; F:monooxygenase activity; F:electron carrier activity	IPR001128; IPR002401; IPR017972; PTHR24292 (PANTHER), PTHR24292:SF175 (PANTHER), SignalP-NN(euk) (SIGNALP)	cytochrome P450 [Source:VB External Description;Acc:AAEL001807]
AAEL008411-RA	serine collagenase 1	3.73972	up	0.000395149	4.8268e-05		2.18459	up	0.000102768	2.05537e-05	1.71187	-	no IPS match	conserved hypothetical protein [Source:VB External Description;Acc:AAEL002208]
AAEL010536-RA	maltase 2	3.71635	up	0.000470308	6.89731e-05		4.20294	up	1.44688e-05	6.88857e-07	0.884226	F:structural constituent of cuticle	IPR000618; PTHR10380 (PANTHER)	conserved hypothetical protein [Source:VB External Description;Acc:AAEL003266]
AAEL002375-RA	nbp2b protein	3.71559	up	0.000501102	7.68659e-05		3.12984	up	1.91868e-05	1.15868e-06	1.18715	-	no IPS match	hypothetical protein [Source:VB External Description;Acc:AAEL006909]
AAEL002031-RA	cytochrome p450 CYP12F7	3.71339	up	0.000336226	3.49326e-05		3.83527	up	1.76844e-05	9.80851e-07	0.968221	F:metal ion binding; P:intracellular signaling pathway	no IPS match	hypothetical protein [Source:VB External Description;Acc:AAEL010750]
AAEL005669-RA	hypothetical protein AaeL_AAEL005669 [Aedes aegypti]	3.70597	up	0.00717132	0.00360587		3.46698	up	0.000129197	2.91039e-05	1.06894	F:N-acetyltransferase activity; P:metabolic process	IPR000182; IPR016181; PTHR20905 (PANTHER)	conserved hypothetical protein [Source:VB External Description;Acc:AAEL014713]
AAEL004814-RA	potassium-dependent sodium-calcium	3.7051	up	0.000722714	0.000147695		2.25554	up	0.00604699	0.00355943	1.64267	-	IPR006631; PTHR21398 (PANTHER)	conserved hypothetical protein [Source:VB External Description;Acc:AAEL009434]
AAEL010204-RA	dihydropyrimidine dehydrogenase	3.70387	up	0.000208978	1.04535e-05		3.6381	up	7.65432e-06	1.67458e-07	1.01808	F:structural constituent of cuticle	IPR000618; PTHR12236 (PANTHER)	conserved hypothetical protein [Source:VB External Description;Acc:AAEL013377]
AAEL007162-RA	gaba receptor-associated protein	3.70253	up	0.000398486	4.96944e-05		3.98018	up	1.79045e-05	1.01342e-06	0.930242	F:ATPase activity; F:ATP binding; P:auxin biosynthetic process	no IPS match	ATP-binding cassette sub-family A member 3, putative [Source:VB External Description;Acc:AAEL008384]
AAEL012849-RA	isoform a	3.70223	up	0.000788314	0.000170826		4.03578	up	0.000251288	7.14973e-05	0.917353	-	IPR013922; PTHR15615 (PANTHER)	conserved hypothetical protein [Source:VB External Description;Acc:AAEL001810]
AAEL007456-RA	zinc finger	3.69311	up	0.000545824	9.03325e-05		3.69732	up	2.8967e-05	2.63503e-06	0.998862	F:DNA-dependent ATPase activity; P:chromatin-mediated maintenance of transcription; P:axonogenesis; P:dendrite morphogenesis; F:general RNA polymerase II transcription factor activity; P:muscle organ development; P:phagocytosis, engulfment; F:helicase activity; F:transcription coactivator activity; F:DNA binding; P:imaginal disc-derived wing vein specification; P:oogenesis; P:hemocyte proliferati…	seg (SEG), SignalP-NN(euk) (SIGNALP)	helicase [Source:VB External Description;Acc:AAEL004942]
AAEL014166-RA	hypothetical protein AaeL_AAEL014166 [Aedes aegypti]	3.67426	up	0.000330314	3.37108e-05		4.91173	up	5.67356e-05	8.16494e-06	0.748058	F:hydrolase activity, acting on ester bonds; F:metal ion binding; P:nucleotide catabolic process; F:nucleotide binding	IPR004843; IPR006146; IPR006179; IPR008334; G3DSA:3.60.21.10 (GENE3D), PTHR11575:SF7 (PANTHER), SSF56300 (SUPERFAMILY)	apyrase, putative [Source:VB External Description;Acc:AAEL010986]
AAEL006013-RA	huntingtin interacting protein	3.66816	up	0.00153119	0.000471054		3.52029	up	3.92155e-05	4.4839e-06	1.04201	-	no IPS match	hypothetical protein [Source:VB External Description;Acc:AAEL006962]
AAEL001294-RA	hypothetical protein AaeL_AAEL001294 [Aedes aegypti]	3.66371	up	0.000437549	5.95371e-05		2.76407	up	8.86662e-05	1.64132e-05	1.32548	F:structural constituent of cuticle	IPR000618; PTHR24637 (PANTHER), PTHR24637:SF51 (PANTHER)	conserved hypothetical protein [Source:VB External Description;Acc:AAEL011032]
AAEL014199-RA	dihydropyrimidine dehydrogenase	3.65588	up	0.00016461	5.38482e-06		3.47152	up	4.45541e-06	5.11879e-08	1.05311	P:glucose metabolic process; P:negative regulation of transcription, DNA-dependent; P:anterior/posterior axis specification, embryo; P:posterior head segmentation; P:regulation of transcription from RNA polymerase II promoter; P:salivary gland cell autophagic cell death; P:genital disc anterior/posterior pattern formation; P:regulation of axonogenesis; P:tryptophan catabolic process to kynurenine…	seg (SEG)	Tryptophan 2,3-dioxygenase (TDO)(EC 1.13.11.11)(Tryptophan pyrrolase)(Tryptophanase)(Tryptophan oxygenase)(TRPO)(TO)(Tryptamin 2,3-dioxygenase) [Source:VB External Description;Acc:AAEL000428]
AAEL001235-RA	palmitoyl-protein thioesterase	3.65127	up	0.000199693	9.39738e-06		3.90816	up	0.000109692	2.28263e-05	0.934268	P:oxidation reduction; P:transport; F:oxygen transporter activity; F:monophenol monooxygenase activity	seg (SEG), SignalP-NN(euk) (SIGNALP)	prophenoloxidase [Source:VB External Description;Acc:AAEL015113]
AAEL002593-RB	serine protease	3.64803	up	0.000135787	2.93011e-06		3.1904	up	7.65432e-06	1.51862e-07	1.14344	F:nucleic acid binding; C:intracellular; F:zinc ion binding	IPR007087; IPR013087; IPR015880; PTHR24377 (PANTHER), PTHR24377:SF381 (PANTHER), SSF57667 (SUPERFAMILY)	hypothetical protein [Source:VB External Description;Acc:AAEL010287]
AAEL005669-RB	hypothetical protein AaeL_AAEL005669 [Aedes aegypti]	3.64642	up	0.00812625	0.00422242		3.45956	up	8.27324e-05	1.47591e-05	1.05401	-	IPR006840; IPR013024	conserved hypothetical protein [Source:VB External Description;Acc:AAEL014922]
AAEL005669-RC	hypothetical protein AaeL_AAEL005669 [Aedes aegypti]	3.63325	up	0.00759116	0.00385975		3.44078	up	0.000211504	5.65169e-05	1.05594	F:hydrolase activity	no IPS match	epoxide hydrolase [Source:VB External Description;Acc:AAEL006342]
AAEL002593-RA	serine protease	3.61819	up	0.00017517	6.41703e-06		3.18104	up	8.58924e-06	2.59062e-07	1.13742	F:alpha,alpha-trehalose-phosphate synthase (UDP-forming) activity; C:lipid particle; P:trehalose biosynthetic process	IPR001830; IPR003337; IPR006379; IPR023214; G3DSA:3.40.50.2000 (GENE3D), PTHR10788 (PANTHER), SSF53756 (SUPERFAMILY)	trehalose-6-phosphate synthase [Source:VB External Description;Acc:AAEL006446]
AAEL013411-RA	basement membrane-specific heparan sulfate proteoglycan core protein	3.61418	up	0.00206026	0.000712332		3.37427	up	0.000401086	0.000133881	1.0711	C:extracellular region; F:calcium-dependent phospholipase A2 activity; F:calcium ion binding; P:phospholipid metabolic process; P:lipid catabolic process	IPR001211; IPR013090; IPR016090; PTHR12253:SF3 (PANTHER)	secretory Phospholipase A2, putative [Source:VB External Description;Acc:AAEL014113]
AAEL012849-RB	isoform a	3.61155	up	0.000702294	0.000140252		3.74408	up	7.84236e-05	1.34752e-05	0.964603	F:heme binding; P:oxidation reduction; F:monooxygenase activity; F:electron carrier activity	IPR001128; IPR002402; PTHR24292 (PANTHER), PTHR24292:SF175 (PANTHER), seg (SEG), SignalP-NN(euk) (SIGNALP), tmhmm (TMHMM)	cytochrome P450 [Source:VB External Description;Acc:AAEL017217]
AAEL006482-RA	sugar transporter	3.60044	up	0.000259965	1.98723e-05		3.34192	up	2.79593e-05	2.50481e-06	1.07736	F:serine-type endopeptidase activity; P:proteolysis	IPR001254; IPR001314; IPR009003; G3DSA:2.40.10.10 (GENE3D), PTHR24268 (PANTHER), PTHR24268:SF174 (PANTHER)	serine protease [Source:VB External Description;Acc:AAEL002593]
AAEL013327-RA	protein takeout	3.59986	up	0.0016344	0.000515842		2.47448	up	0.0051647	0.00296767	1.45479	-	no IPS match	conserved hypothetical protein [Source:VB External Description;Acc:AAEL014236]
AAEL000895-RA	peroxisome biogenesis factor 1 (peroxin-1)	3.59959	up	0.000521662	8.24484e-05		3.17557	up	0.000298056	9.07939e-05	1.13352	-	no IPS match	conserved hypothetical protein [Source:VB External Description;Acc:AAEL011296]
AAEL003402-RB	sphingomyelin phosphodiesterase	3.59698	up	0.00236896	0.000866954		3.61582	up	0.00225829	0.00112187	0.994788	F:protein binding	IPR001611; G3DSA:3.80.10.10 (GENE3D), PTHR23155 (PANTHER), PF12799 (PFAM), SSF52058 (SUPERFAMILY)	conserved hypothetical protein [Source:VB External Description;Acc:AAEL007224]
AAEL001920-RA	isoform a	3.59604	up	0.000159244	4.69025e-06		4.06281	up	9.28202e-05	1.75672e-05	0.88511	-	IPR004119; IPR011009; IPR015897; G3DSA:3.90.1200.10 (GENE3D), PTHR11012 (PANTHER)	conserved hypothetical protein [Source:VB External Description;Acc:AAEL006207]
AAEL012228-RA	SspC, putative [Aedes aegypti]	3.59032	up	0.00104555	0.000264693		2.5484	up	0.00118061	0.00051714	1.40885	C:lipid particle	IPR005511; IPR011042; IPR013658; PTHR10907 (PANTHER), PTHR10907:SF11 (PANTHER), SSF63829 (SUPERFAMILY)	anterior fat body protein [Source:VB External Description;Acc:AAEL001022]
AAEL007399-RA	hypothetical protein AaeL_AAEL007399 [Aedes aegypti]	3.58814	up	0.00303894	0.00122645		3.36622	up	0.000269125	7.88748e-05	1.06593	C:extracellular region; F:chitin binding; P:chitin metabolic process	IPR002557	conserved hypothetical protein [Source:VB External Description;Acc:AAEL010307]
AAEL003810-RA	sugar transporter	3.58491	up	0.000305332	2.74337e-05		5.2035	up	2.88492e-05	2.6161e-06	0.688943	F:oxidoreductase activity; P:oxidation reduction; F:binding	IPR002198; IPR002347; IPR016040; PTHR24320 (PANTHER), PTHR24320:SF98 (PANTHER), SSF51735 (SUPERFAMILY)	short-chain dehydrogenase [Source:VB External Description;Acc:AAEL004579]
AAEL011766-RA	clka_dicdi ame: full=probable serine threonine-protein kinase clka ame: full=cdc2-like kinase a	3.58194	up	0.000703286	0.000140667		3.45875	up	0.000157766	3.80028e-05	1.03562	-	IPR010512; G3DSA:2.70.220.10 (GENE3D)	conserved hypothetical protein [Source:VB External Description;Acc:AAEL002117]
AAEL014113-RA	phospholipase a2	3.58028	up	0.000218457	1.18269e-05		4.34947	up	0.000437431	0.000149992	0.823153	F:transferase activity	IPR004045; IPR004046; IPR010987; IPR012336; IPR017933; PTHR11260 (PANTHER), PTHR11260:SF8 (PANTHER)	glutathionetransferase [Source:VB External Description;Acc:AAEL009020]
AAEL006581-RA	juvenile hormone-inducible	3.57645	up	0.00239229	0.00087967		5.03396	up	0.00137449	0.000620994	0.710466	-	no IPS match	hypothetical protein [Source:VB External Description;Acc:AAEL012398]
AAEL007984-RA	hypothetical protein AaeL_AAEL007984 [Aedes aegypti]	3.57642	up	0.000540922	8.91375e-05		3.52507	up	0.000292256	8.86611e-05	1.01457	F:metal ion binding; P:oxidation reduction; P:superoxide metabolic process; F:superoxide dismutase activity	IPR001424; IPR018152; IPR024134	Copper-Zinc(Cu-Zn) Superoxide Dismutase. [Source:VB External Description;Acc:AAEL006271]
AAEL001419-RA	nocturnin	3.57294	up	0.000415719	5.36838e-05		3.91384	up	0.000194166	5.04263e-05	0.9129	F:protein binding; C:Z disc	IPR001478; G3DSA:2.30.42.10 (GENE3D), PTHR24210 (PANTHER), PTHR24210:SF94 (PANTHER)	uncharacerized [Source:VB External Description;Acc:AAEL015076]
AAEL014713-RA	arylalkylamine n-acetyltransferase	3.56976	up	0.00139027	0.000407612		3.16562	up	7.23966e-05	1.19731e-05	1.12767	P:cellular metabolic process; F:coenzyme binding; F:catalytic activity	IPR001509; IPR016040; G3DSA:3.90.25.10 (GENE3D), PTHR10366 (PANTHER), PTHR10366:SF12 (PANTHER), SSF51735 (SUPERFAMILY)	threonine dehydrogenase [Source:VB External Description;Acc:AAEL003443]
AAEL008491-RA	uncharacterized protein c18orf8-like protein	3.56534	up	0.000120555	1.27028e-06		3.23353	up	1.68231e-05	8.90571e-07	1.10261	C:integral to membrane	IPR008253; IPR021128	conserved hypothetical protein [Source:VB External Description;Acc:AAEL009483]
AAEL001484-RA	chromosome region maintenance protein 1 exportin	3.56448	up	0.000135787	2.99456e-06		2.83842	up	0.000124318	2.72221e-05	1.2558	-	seg (SEG), tmhmm (TMHMM)	cuticle protein, putative [Source:VB External Description;Acc:AAEL002185]
AAEL014436-RA	hypothetical protein AaeL_AAEL014436 [Aedes aegypti]	3.56258	up	0.00897651	0.0047632		3.42356	up	0.00142302	0.000648135	1.04061	P:transmembrane transport	IPR011701; IPR016196; G3DSA:1.20.1250.20 (GENE3D), PTHR11360 (PANTHER), PTHR11360:SF15 (PANTHER)	monocarboxylate transporter [Source:VB External Description;Acc:AAEL004905]
AAEL007734-RA	---NA---	3.55854	up	0.00064215	0.00012061		2.62005	up	0.000180458	4.59183e-05	1.35819	-	no IPS match	conserved hypothetical protein [Source:VB External Description;Acc:AAEL009201]
AAEL010307-RA	probable chitinase 1	3.54482	up	0.000583156	0.000102527		2.74242	up	0.000201463	5.29792e-05	1.29259	C:cytoplasm; F:mRNA 3'-UTR binding; P:intracellular mRNA localization; P:anterior/posterior axis specification, embryo; C:nucleus; F:nucleotide binding	seg (SEG)	myelinprotein expression factor [Source:VB External Description;Acc:AAEL003670]
AAEL003980-RA	component of oligomeric golgi complex	3.5422	up	0.002126	0.000745742		2.55318	up	0.00199419	0.000972782	1.38737	F:oxidoreductase activity; P:oxidation reduction; F:binding	IPR002198; IPR002347; IPR016040; PTHR24322 (PANTHER), PTHR24322:SF28 (PANTHER), SSF51735 (SUPERFAMILY)	hydroxybutyrate dehydrogenase [Source:VB External Description;Acc:AAEL012400]
AAEL006420-RA	programmed cell death protein 10	3.53501	up	0.000129176	1.95509e-06		3.48152	up	3.15836e-05	3.06858e-06	1.01536	P:transmembrane transport; C:plasma membrane	IPR010291; IPR016196; G3DSA:1.20.1250.20 (GENE3D), PTHR19444 (PANTHER), PTHR19444:SF10 (PANTHER)	UNC93A protein, putative [Source:VB External Description;Acc:AAEL004048]
AAEL005779-RB	cral trio domain-containing protein	3.53492	up	0.00118171	0.00031823		4.86732	up	0.000969813	0.000403364	0.726255	F:zinc ion binding; C:intracellular	IPR013243; IPR015880; PTHR15117 (PANTHER)	conserved hypothetical protein [Source:VB External Description;Acc:AAEL010974]
AAEL002866-RA	cyclin l	3.53466	up	0.000243577	1.57274e-05		3.25354	up	0.000204808	5.40549e-05	1.08641	-	no IPS match	hypothetical protein [Source:VB External Description;Acc:AAEL002018]
AAEL001561-RC	hypothetical protein AaeL_AAEL001561 [Aedes aegypti]	3.53438	up	0.000257138	1.84402e-05		3.80976	up	2.65801e-05	2.32051e-06	0.927719	-	no IPS match	hypothetical protein [Source:VB External Description;Acc:AAEL011128]
AAEL011803-RA	prohibitin, putative [Aedes aegypti]	3.51988	up	0.000129176	2.00373e-06		3.41272	up	7.07533e-05	1.15917e-05	1.0314	P:mitotic spindle organization; C:centrosome; P:tricarboxylic acid cycle; C:succinate-CoA ligase complex (ADP-forming); F:succinate-CoA ligase (ADP-forming) activity; F:ATP binding; P:regulation of centrosome duplication	IPR005809; IPR005811; IPR011761; IPR013650; IPR013815; IPR013816; IPR016102; IPR017866; SSF56059 (SUPERFAMILY)	succinyl-coa synthetase beta chain [Source:VB External Description;Acc:AAEL011746]
AAEL001484-RB	chromosome region maintenance protein 1 exportin	3.51614	up	0.000203732	9.88459e-06		2.85399	up	0.000260299	7.53435e-05	1.23201	F:serine-type endopeptidase activity; P:proteolysis	IPR001254; IPR009003; G3DSA:2.40.10.10 (GENE3D), PTHR24260 (PANTHER)	serine collagenase 1 precursor, putative [Source:VB External Description;Acc:AAEL002519]
AAEL001490-RA	drosophila melanogaster cg14022	3.50913	up	0.000199693	9.41948e-06		3.92684	up	2.20566e-05	1.57979e-06	0.893626	P:trehalose metabolic process; F:alpha,alpha-trehalase activity	IPR001661; IPR008928; IPR018232	alpha,alpha-trehalase [Source:VB External Description;Acc:AAEL009658]
AAEL001528-RA	secretory phospholipase a2	3.50509	up	0.00515771	0.00240255		2.58492	up	0.00802349	0.00489316	1.35598	F:sequence-specific DNA binding; F:protein dimerization activity; F:transcription factor activity; C:nucleus; P:regulation of transcription, DNA-dependent	IPR011700; G3DSA:1.20.5.170 (GENE3D), PTHR21051 (PANTHER), PTHR21051:SF1 (PANTHER)	conserved hypothetical protein [Source:VB External Description;Acc:AAEL007444]
AAEL001683-RA	retininc containing cg13043-like protein	3.50111	up	0.00014397	3.27436e-06		2.82086	up	8.17978e-05	1.44477e-05	1.24115	C:cytoplasm; F:tetrahydrofolylpolyglutamate synthase activity; F:ATP binding; P:folic acid and derivative biosynthetic process	no IPS match	folylpolyglutamate synthase [Source:VB External Description;Acc:AAEL012882]
AAEL007603-RA	odorant-binding protein	3.49947	up	0.00691419	0.00344608		3.24121	up	0.00206803	0.00101429	1.07968	C:intracellular; F:zinc ion binding	IPR007087; IPR013087; IPR015880; PTHR11389 (PANTHER), SSF57667 (SUPERFAMILY)	zinc finger protein, putative [Source:VB External Description;Acc:AAEL007456]
AAEL007659-RA	neuroblastoma suppressor of tumorigenicity 1	3.49898	up	0.000175666	6.54283e-06		3.21416	up	9.86814e-05	1.93299e-05	1.08861	P:transport; F:lipid binding; F:transporter activity	no IPS match	apolipoprotein D, putative [Source:VB External Description;Acc:AAEL013574]
AAEL008717-RA	cg12164 cg12164-pa	3.49815	up	0.00065102	0.000123632		3.0291	up	0.00807762	0.00493536	1.15485	-	no IPS match	alpha-n-acetylglucosaminidase [Source:VB External Description;Acc:AAEL003150]
AAEL006174-RA	cg11981-pa	3.48475	up	0.000718496	0.000145749		2.93728	up	7.65617e-06	1.83787e-07	1.18639	-	seg (SEG)	hypothetical protein [Source:VB External Description;Acc:AAEL004972]
AAEL008186-RA	arrestin domain-containing protein 2	3.48237	up	0.000785473	0.000169525		3.54624	up	7.84236e-05	1.34662e-05	0.981989	F:binding	IPR011990; IPR019412; SSF48452 (SUPERFAMILY)	conserved hypothetical protein [Source:VB External Description;Acc:AAEL004330]
AAEL011337-RA	hypothetical protein AaeL_AAEL011337 [Aedes aegypti]	3.47336	up	0.00396612	0.00171871		4.07156	up	0.000568379	0.000208753	0.85308	P:pole cell formation; F:protein binding; P:response to DNA damage stimulus; P:pole plasm assembly; C:nuclear pore; P:negative regulation of transcription from RNA polymerase III promoter; C:pole plasm; P:pole cell fate determination; C:glutamate-cysteine ligase complex; C:perinuclear region of cytoplasm; P:glutathione biosynthetic process; F:glutamate-cysteine ligase activity	IPR000210; IPR011333; IPR011990; IPR013069; PTHR23231 (PANTHER), PTHR23231:SF5 (PANTHER)	germ cell-less protein [Source:VB External Description;Acc:AAEL000856]
AAEL008397-RA	phospholipid-hydroperoxide glutathione peroxidase	3.46813	up	0.000909279	0.000212112		3.30822	up	0.000102219	2.0405e-05	1.04834	C:U5 snRNP; C:precatalytic spliceosome; P:nuclear mRNA splicing, via spliceosome; C:catalytic step 2 spliceosome	IPR000555; IPR012591; IPR012592; IPR012984; IPR019580; IPR019581; IPR019582; IPR021983; PTHR11140 (PANTHER)	pre-mRNA splicing factor prp8 [Source:VB External Description;Acc:AAEL009959]
AAEL002964-RA	brain chitinase and chia	3.45682	up	0.000143986	3.29887e-06		2.91446	up	0.00024561	6.90749e-05	1.18609	F:protein binding; C:integral to membrane	IPR000483; IPR001611; IPR003591; G3DSA:3.80.10.10 (GENE3D), PTHR24373 (PANTHER), PTHR24373:SF93 (PANTHER), PF12799 (PFAM), SSF52058 (SUPERFAMILY)	leucine-rich transmembrane protein [Source:VB External Description;Acc:AAEL002307]
AAEL013026-RA	guanylate cyclase	3.45265	up	0.000147572	3.48103e-06		3.2609	up	0.000161635	3.92294e-05	1.0588	C:cytoplasm; C:proteasome core complex; P:response to DNA damage stimulus; C:nucleus; F:threonine-type endopeptidase activity; P:proteolysis involved in cellular protein catabolic process	IPR001353; IPR016050; IPR023333; G3DSA:3.60.20.10 (GENE3D), PTHR11599 (PANTHER), PTHR11599:SF7 (PANTHER), SSF56235 (SUPERFAMILY)	proteasome subunit beta type [Source:VB External Description;Acc:AAEL006174]
AAEL012687-RA	juvenile hormone-inducible	3.44771	up	0.000535483	8.69947e-05		4.13287	up	4.25122e-05	5.10254e-06	0.834217	-	G3DSA:3.40.50.1820 (GENE3D), PTHR12277 (PANTHER), PTHR12277:SF1 (PANTHER), PF12697 (PFAM), SSF53474 (SUPERFAMILY)	conserved hypothetical protein [Source:VB External Description;Acc:AAEL007874]
AAEL006342-RB	epoxide hydrolase	3.44275	up	0.000519207	8.17423e-05		3.69026	up	3.71838e-05	4.14824e-06	0.932931	-	IPR004119; IPR011009; IPR015897; G3DSA:3.90.1200.10 (GENE3D), PTHR11012 (PANTHER)	juvenile hormone-inducible protein, putative [Source:VB External Description;Acc:AAEL006600]
AAEL013499-RA	prophenoloxidase	3.42851	up	7.78397e-05	3.56895e-07		5.33986	up	0.000612022	0.000229421	0.642061	-	no IPS match	conserved hypothetical protein [Source:VB External Description;Acc:AAEL002397]
AAEL007930-RA	sugar transporter	3.41902	up	0.000569454	9.8091e-05		3.25407	up	0.000169564	4.19464e-05	1.05069	-	IPR010562; PTHR11008 (PANTHER)	conserved hypothetical protein [Source:VB External Description;Acc:AAEL014364]
AAEL004247-RA	sodium sialic acid	3.41847	up	0.000208352	1.03129e-05		3.2815	up	3.2476e-05	3.23629e-06	1.04174	F:serine-type endopeptidase activity; P:proteolysis	IPR001254; IPR001314; IPR006604; IPR009003; IPR018114; IPR022700; G3DSA:2.40.10.10 (GENE3D), PTHR24268 (PANTHER), PTHR24268:SF230 (PANTHER), seg (SEG), SignalP-NN(euk) (SIGNALP)	Clip-domain serine protease, family B [Source:VB External Description;Acc:AAEL000038]
AAEL014922-RA	isoform a	3.41189	up	0.00205245	0.000709129		3.0975	up	0.000692887	0.000267613	1.1015	F:kynurenine 3-monooxygenase activity; P:pyridine nucleotide biosynthetic process; P:oxidation reduction; P:NAD metabolic process; C:integral to membrane; C:mitochondrial outer membrane	IPR002938; IPR003042; G3DSA:3.50.50.60 (GENE3D), PTHR13789 (PANTHER), PTHR13789:SF3 (PANTHER), SSF51905 (SUPERFAMILY)	kynurenine 3-monooxygenase [Source:VB External Description;Acc:AAEL012757]
AAEL003541-RA	32 kda beta-galactoside-binding lectin lec-3	3.40976	up	0.000138061	3.06164e-06		3.78759	up	8.39089e-06	2.42017e-07	0.900245	-	seg (SEG)	hypothetical protein [Source:VB External Description;Acc:AAEL009477]
AAEL011354-RA	zinc finger protein	3.40857	up	0.00024892	1.67574e-05		3.24555	up	9.83985e-05	1.92446e-05	1.05023	F:heme binding; P:oxidation reduction; F:monooxygenase activity; F:electron carrier activity	IPR001128; IPR002401; IPR017972; PTHR24292 (PANTHER), PTHR24292:SF175 (PANTHER), seg (SEG), SignalP-NN(euk) (SIGNALP)	cytochrome P450 [Source:VB External Description;Acc:AAEL008846]
AAEL011736-RA	enoyl coenzyme a hydratase domain containing 3	3.40715	up	0.000893059	0.000206783		3.36831	up	5.32241e-05	7.31063e-06	1.01153	F:tubulin-tyrosine ligase activity; P:protein modification process	IPR004344; IPR013816; PTHR12241:SF9 (PANTHER), SSF56059 (SUPERFAMILY)	conserved hypothetical protein [Source:VB External Description;Acc:AAEL001898]
AAEL005221-RB	internalin a	3.40659	up	0.000242416	1.55631e-05		4.27747	up	0.000237026	6.56127e-05	0.796402	P:carbohydrate metabolic process; F:hydrolase activity, hydrolyzing O-glycosyl compounds; F:cation binding	IPR001360; IPR013781; IPR017853; IPR018120; PTHR10353:SF8 (PANTHER)	glycoside hydrolases [Source:VB External Description;Acc:AAEL009243]
AAEL000428-RA	tryptophan oxygenase	3.40181	up	0.000112781	9.43783e-07		3.41893	up	7.01756e-05	1.14375e-05	0.994993	F:kinase activity; P:proteolysis; F:serine-type endopeptidase activity	IPR001254; IPR009003; G3DSA:2.40.10.10 (GENE3D), PTHR24258 (PANTHER), PTHR24258:SF179 (PANTHER)	lumbrokinase-3(1) precursor, putative [Source:VB External Description;Acc:AAEL012563]
AAEL006899-RA	dna-j hsp40	3.39378	up	0.00243091	0.000896477		3.34392	up	0.000637555	0.000241537	1.01491	C:eukaryotic translation initiation factor 3 complex; P:translational initiation; F:translation initiation factor activity; C:cytosol; P:phagocytosis, engulfment	no IPS match	Eukaryotic translation initiation factor 3 subunit E (eIF3e)(Eukaryotic translation initiation factor 3 subunit 6) [Source:VB External Description;Acc:AAEL002334]
AAEL006342-RC	epoxide hydrolase	3.38988	up	0.000737257	0.000152745		3.56508	up	2.24684e-05	1.64077e-06	0.950855	F:sulfotransferase activity	IPR000863; G3DSA:3.40.50.300 (GENE3D), PTHR11783 (PANTHER), PTHR11783:SF3 (PANTHER), SSF52540 (SUPERFAMILY)	sulfotransferase (sult) [Source:VB External Description;Acc:AAEL007913]
AAEL002633-RA	cytochrome p450 CYP9J31	3.3872	up	0.00024892	1.65907e-05		3.4476	up	6.48951e-05	1.02926e-05	0.98248		IPR000719; IPR002290; IPR003598; IPR003599; IPR003961; IPR007110; IPR008271; IPR008957; IPR011009; IPR013098; IPR013783; IPR017441; IPR017442; PR00014 (PRINTS), G3DSA:1.10.510.10 (GENE3D), G3DSA:3.30.200.20 (GENE3D), PTHR19900 (PANTHER), PTHR19900:SF7 (PANTHER), SSF48726 (SUPERFAMILY)	titin [Source:VB External Description;Acc:AAEL002565]
AAEL015533-RA	coagulation factor xi	3.38672	up	0.00332784	0.00138259		4.03141	up	0.000952391	0.000394553	0.840082	P:fatty acid metabolic process; F:oxidoreductase activity; F:binding	IPR006108; IPR006176; IPR006180; IPR008927; IPR013328; IPR016040; IPR022694; PTHR23309 (PANTHER), SSF51735 (SUPERFAMILY)	3-hydroxyacyl-coa dehyrogenase [Source:VB External Description;Acc:AAEL008006]
AAEL014364-RA	protein takeout	3.38493	up	0.00810615	0.00420701		3.37261	up	0.00425049	0.00236019	1.00365	C:transcription elongation factor complex; P:RNA elongation from RNA polymerase II promoter; F:RNA polymerase II transcription elongation factor activity	IPR010844; IPR019464; PTHR23288 (PANTHER), PTHR23288:SF2 (PANTHER)	hypothetical protein [Source:VB External Description;Acc:AAEL006021]
AAEL013742-RA	transmembrane protein 135	3.37895	up	0.000379745	4.42272e-05		4.21077	up	0.000111315	2.33038e-05	0.802454	-	IPR009832; PTHR20997 (PANTHER)	conserved hypothetical protein [Source:VB External Description;Acc:AAEL003479]
AAEL008386-RA	atp-binding cassette sub-family a member	3.37695	up	0.00202932	0.000697658		3.96042	up	0.000288918	8.71682e-05	0.852674	F:oxidoreductase activity	IPR007822; IPR008928; IPR020464; PTHR12736 (PANTHER), PTHR12736:SF3 (PANTHER), seg (SEG)	conserved hypothetical protein [Source:VB External Description;Acc:AAEL012073]
AAEL014201-RA	chaperone protein	3.37591	up	0.00266084	0.00101387		2.62185	up	0.000343913	0.000109539	1.28761	-	no IPS match	hypothetical protein [Source:VB External Description;Acc:AAEL011980]
AAEL004169-RA	hypothetical protein AaeL_AAEL004169 [Aedes aegypti]	3.37459	up	0.000814645	0.000179988		2.89187	up	0.0066578	0.00397197	1.16692	F:oxidoreductase activity; F:FAD binding	IPR004113; IPR006094; IPR016164; IPR016166; IPR016167; IPR016168; IPR016171; PTHR11748 (PANTHER), PTHR11748:SF7 (PANTHER)	d-lactate dehydrognease 2, [Source:VB External Description;Acc:AAEL005927]
AAEL008846-RA	cytochrome p450 CYP9J32	3.36495	up	0.000813622	0.000179332		2.78104	up	0.000361868	0.000117579	1.20996	P:auxin biosynthetic process; F:ATPase activity, coupled to transmembrane movement of substances; P:transmembrane transport; F:ATP binding; C:integral to membrane	IPR001140; IPR003439; IPR003593; IPR011527; IPR017871; IPR017940; G3DSA:1.20.1560.10 (GENE3D), G3DSA:3.40.50.300 (GENE3D), PTHR24223 (PANTHER), PTHR24223:SF97 (PANTHER), SSF52540 (SUPERFAMILY)	ATP-binding cassette transporter [Source:VB External Description;Acc:AAEL012395]
AAEL006457-RA	asparagine synthetase	3.36277	up	0.000240526	1.45686e-05		2.97266	up	0.000287817	8.66384e-05	1.13123	-	PTHR12336 (PANTHER)	cuticle protein, putative [Source:VB External Description;Acc:AAEL002181]
AAEL014605-RA	cytochrome p450	3.35392	up	0.000418005	5.45936e-05		3.04599	up	0.000136275	3.14383e-05	1.1011	P:compound eye morphogenesis; F:transcription regulator activity; P:regulation of transcription; C:nucleus	IPR024097; IPR024103	helix-loop-helix transcription factor [Source:VB External Description;Acc:AAEL008410]
AAEL011306-RA	isoform b	3.35374	up	0.00153119	0.000471252		3.21394	up	1.4284e-05	6.71502e-07	1.0435	-	no IPS match	conserved hypothetical protein [Source:VB External Description;Acc:AAEL010838]
AAEL009959-RA	pre-mrna splicing factor prp8	3.34838	up	7.36179e-05	1.99189e-07		3.02991	up	6.50052e-05	1.03236e-05	1.10511	P:carbohydrate metabolic process; F:cation binding; C:plasma membrane part; P:response to organic substance; F:lactase activity	IPR001360; IPR013781; IPR017853; IPR018120	glycoside hydrolases [Source:VB External Description;Acc:AAEL009246]
AAEL001107-RA	hypothetical protein AaeL_AAEL001107 [Aedes aegypti]	3.34655	up	0.00199661	0.000679562		2.8202	up	0.00146022	0.00066932	1.18663			TRANSCRIPT NOT FOUND ON VECTORBASE
AAEL010839-RA	l long form	3.34302	up	0.00105785	0.000269784		2.77273	up	0.00033414	0.000105329	1.20568	P:oxidation reduction; F:oxidoreductase activity; F:calcium ion binding; P:cell adhesion; F:trimethyllysine dioxygenase activity; P:carnitine biosynthetic process; F:iron ion binding; F:L-ascorbic acid binding	no IPS match	conserved hypothetical protein [Source:VB External Description;Acc:AAEL008882]
AAEL010838-RA	homeodomain transcription factor	3.33985	up	0.000471867	6.93389e-05		3.83365	up	0.000798497	0.000319918	0.871193	F:nucleic acid binding; C:nucleus; F:zinc ion binding	IPR006612; IPR007087; IPR012934; IPR013087; IPR015880; PTHR24375 (PANTHER), PTHR24375:SF381 (PANTHER), SSF57667 (SUPERFAMILY)	hypothetical protein [Source:VB External Description;Acc:AAEL015442]
AAEL010780-RA	zinc carboxypeptidase a 1	3.32277	up	0.00219508	0.000778848		3.72906	up	0.000435889	0.000149188	0.891048	F:nucleic acid binding; C:nucleus; F:zinc ion binding	IPR006612; IPR007087; IPR013087; IPR015880; PTHR11389 (PANTHER), PTHR11389:SF375 (PANTHER), SSF57667 (SUPERFAMILY)	hypothetical protein [Source:VB External Description;Acc:AAEL003153]
AAEL013987-RA	isoform a	3.32128	up	0.00141005	0.000417998		4.03319	up	5.5416e-05	7.79954e-06	0.823486	F:binding	IPR011990; IPR013026; PTHR16056 (PANTHER), PTHR16056:SF3 (PANTHER), SSF48452 (SUPERFAMILY)	conserved hypothetical protein [Source:VB External Description;Acc:AAEL003428]
AAEL011529-RA	mitogen-activated protein-binding protein-interacting protein	3.31977	up	0.000466871	6.82403e-05		2.85574	up	1.95656e-05	1.21868e-06	1.16249	P:positive regulation of cell growth; P:sex differentiation; P:insulin receptor signaling pathway; P:response to DNA damage stimulus; C:mitochondrial matrix; P:peptidyl-histidine phosphorylation; P:pyruvate metabolic process; P:spermatogenesis; F:pyruvate dehydrogenase (acetyl-transferring) kinase activity; P:anti-apoptosis; P:actin cytoskeleton organization; F:protein serine/threonine kinase act…	tmhmm (TMHMM)	pyruvate dehydrogenase [Source:VB External Description;Acc:AAEL007375]
AAEL006793-RA	cytochrome p450 CYP9J9	3.31032	up	0.000330396	3.39819e-05		2.96008	up	0.000105659	2.15122e-05	1.11832	F:protein binding; P:multicellular organismal development; P:ubiquitin-dependent protein catabolic process; C:nucleus; F:zinc ion binding	IPR001841; IPR004162; IPR008974; IPR013010; IPR013083; IPR013323; IPR018121; PTHR10315:SF10 (PANTHER), seg (SEG), SSF57850 (SUPERFAMILY)	seven in absentia, putative [Source:VB External Description;Acc:AAEL015485]
AAEL006962-RB	hypothetical protein AaeL_AAEL006962 [Aedes aegypti]	3.30756	up	0.000239944	1.4403e-05		4.18314	up	4.22824e-05	5.04274e-06	0.790688	P:proteolysis; F:serine-type endopeptidase activity	IPR001254; IPR001314; IPR009003; IPR018114; G3DSA:2.40.10.10 (GENE3D), PTHR24260 (PANTHER)	elastase, putative [Source:VB External Description;Acc:AAEL000040]
AAEL000038-RA	serine protease	3.30631	up	0.000256939	1.79648e-05		2.59165	up	0.000223305	6.0291e-05	1.27575	-	no IPS match	conserved hypothetical protein [Source:VB External Description;Acc:AAEL013961]
AAEL006342-RA	epoxide hydrolase	3.30304	up	0.000680302	0.00013336		3.55652	up	2.04726e-05	1.35468e-06	0.928728	F:hydrolase activity	IPR002018; IPR019826; G3DSA:3.40.50.1820 (GENE3D), PTHR11559 (PANTHER), PTHR11559:SF128 (PANTHER), SSF53474 (SUPERFAMILY)
AAEL014274-RA	isoform a	3.30209	up	0.00793348	0.00408921		3.54207	up	0.00032008	9.9603e-05	0.93225	P:axon guidance; P:peripheral nervous system development; F:phosphoserine phosphatase activity; P:L-serine biosynthetic process	IPR004469; IPR006383; IPR023190; IPR023214; PTHR10000 (PANTHER), PF12710 (PFAM)	phosphoserine phosphatase [Source:VB External Description;Acc:AAEL001100]
AAEL001261-RA	hypothetical protein AaeL_AAEL001261 [Aedes aegypti]	3.30136	up	0.001697	0.000542034		3.07405	up	5.21978e-05	7.09599e-06	1.07394	F:nucleoside-triphosphatase activity; P:auxin biosynthetic process; P:peroxisome organization; C:peroxisome; F:ATP binding; F:protein binding	seg (SEG), SignalP-NN(euk) (SIGNALP), tmhmm (TMHMM)	peroxisome biogenesis factor 1 (peroxin-1) [Source:VB External Description;Acc:AAEL000895]
AAEL004905-RA	monocarboxylate transporter	3.29557	up	0.000703286	0.000140795		2.13464	up	0.00204149	0.000999722	1.54386	F:structural constituent of ribosome; C:lipid particle; P:ribosome biogenesis; C:cytosolic large ribosomal subunit; C:nucleus; F:DNA-(apurinic or apyrimidinic site) lyase activity; P:translational elongation; P:DNA repair	IPR001790; IPR001813; PTHR21141 (PANTHER), PTHR21141:SF3 (PANTHER)	60S acidic ribosomal protein P0 [Source:VB External Description;Acc:AAEL010821]
AAEL003622-RA	delta -desaturase	3.29447	up	0.00309153	0.00125889		4.0684	up	8.6561e-06	2.62472e-07	0.809771	-	no IPS match	conserved hypothetical protein [Source:VB External Description;Acc:AAEL007607]
AAEL007816-RA	cytochrome p450 CYP4D23	3.28899	up	0.000363174	4.05801e-05		4.89337	up	4.41041e-05	5.43291e-06	0.672132	C:extracellular space; F:growth factor activity; P:cell proliferation; P:purine ribonucleoside monophosphate biosynthetic process; F:adenosine deaminase activity; P:hemocyte differentiation	IPR001365; IPR006331; IPR013659; G3DSA:3.20.20.140 (GENE3D), PTHR11409 (PANTHER), PTHR11409:SF8 (PANTHER), SSF51556 (SUPERFAMILY)	adenosine deaminase [Source:VB External Description;Acc:AAEL005672]
AAEL006848-RA	nuclear receptor binding factor 2	3.275	up	0.000134531	2.51334e-06		3.22804	up	1.88519e-05	1.12485e-06	1.01455	F:structural constituent of cuticle	IPR000618	hypothetical protein [Source:VB External Description;Acc:AAEL011458]
AAEL003883-RA	isoform b	3.2678	up	0.00044096	6.07792e-05		2.90597	up	3.2781e-05	3.28845e-06	1.12451	-	SignalP-NN(euk) (SIGNALP), tmhmm (TMHMM)	hypothetical protein [Source:VB External Description;Acc:AAEL003843]
AAEL014132-RA	thioredoxin binding protein tbp-2 vdup1	3.26576	up	0.00107999	0.000276945		3.41392	up	0.000345377	0.000110141	0.9566	F:molecular_function; P:biological_process; C:cellular_component	seg (SEG)	conserved hypothetical protein [Source:VB External Description;Acc:AAEL005216]
AAEL005251-RA	isoform a	3.25725	up	0.00180989	0.000595167		3.12963	up	0.000552049	0.000200802	1.04078	-	no IPS match	hypothetical protein [Source:VB External Description;Acc:AAEL001261]
AAEL001523-RA	secretory phospholipase	3.25237	up	0.00172785	0.000556123		2.99144	up	0.000486616	0.000172145	1.08723	P:transmembrane transport; C:integral to membrane; F:transporter activity	IPR005828; IPR016196; IPR020846; G3DSA:1.20.1250.20 (GENE3D), PTHR24064 (PANTHER), PTHR24064:SF46 (PANTHER)	organic cation transporter [Source:VB External Description;Acc:AAEL004451]
AAEL005496-RA	zinc iron transporter	3.25167	up	0.000134638	2.64002e-06		3.0019	up	3.05795e-05	2.87057e-06	1.0832	F:serine-type endopeptidase activity; P:proteolysis	IPR001254; IPR009003; G3DSA:2.40.10.10 (GENE3D), PTHR24273 (PANTHER), PTHR24273:SF178 (PANTHER), SignalP-NN(euk) (SIGNALP)	serine collagenase 1 precursor, putative [Source:VB External Description;Acc:AAEL008411]
AAEL002117-RA	kda secreted salivary protein	3.25096	up	0.000523087	8.27377e-05		3.36841	up	4.45541e-06	5.25178e-08	0.96513	P:regulation of membrane potential; P:potassium ion transport; C:integral to membrane; F:G-protein activated inward rectifier potassium channel activity	IPR001838; IPR013518; IPR013521; IPR014756; IPR016449; G3DSA:1.10.287.70 (GENE3D), PTHR11767:SF23 (PANTHER), SSF81324 (SUPERFAMILY)	inwardly rectifying k+ channel, [Source:VB External Description;Acc:AAEL008928]
AAEL014352-RA	isoform a	3.24996	up	0.000186691	8.19458e-06		3.23881	up	3.04279e-05	2.8448e-06	1.00344	-	no IPS match	hypothetical protein [Source:VB External Description;Acc:AAEL014625]
AAEL007534-RA	hypothetical protein AaeL_AAEL007534 [Aedes aegypti]	3.24708	up	0.00206138	0.000713226		3.37987	up	0.000109692	2.28236e-05	0.960712	F:general RNA polymerase II transcription factor activity; P:transcription initiation from RNA polymerase II promoter; C:holo TFIIH complex	IPR005607; IPR011993; IPR013876; PTHR12856 (PANTHER), SSF140383 (SUPERFAMILY), SSF50729 (SUPERFAMILY)	transcription factor TFIIH-subunit, putative [Source:VB External Description;Acc:AAEL012750]
AAEL005264-RA	hypothetical protein AaeL_AAEL005264 [Aedes aegypti]	3.24196	up	0.000474485	7.02834e-05		3.23077	up	0.000169564	4.1938e-05	1.00346	P:cellular iron ion homeostasis; F:ferric iron binding; C:extracellular region; P:iron ion transport	IPR001156; IPR015560; IPR016357; IPR018195; G3DSA:3.40.190.10 (GENE3D), seg (SEG), SignalP-NN(euk) (SIGNALP), tmhmm (TMHMM), SSF53850 (SUPERFAMILY)	transferrin [Source:VB External Description;Acc:AAEL015458]
AAEL011746-RA	succinyl-coa synthetase beta chain	3.24169	up	0.00229854	0.000828791		3.16973	up	0.000288727	8.70742e-05	1.0227	F:Rab GTPase activator activity; C:intracellular; P:regulation of Rab GTPase activity	no IPS match	conserved hypothetical protein [Source:VB External Description;Acc:AAEL010292]
AAEL002627-RA	isoform a	3.24027	up	0.000218457	1.18569e-05		2.86888	up	5.42255e-05	7.52405e-06	1.12946	F:serine-type endopeptidase activity; P:proteolysis	IPR001254; IPR009003; G3DSA:2.40.10.10 (GENE3D), PTHR24260 (PANTHER), PTHR24260:SF199 (PANTHER)	serine protease, putative [Source:VB External Description;Acc:AAEL005787]
AAEL006904-RA	hypothetical protein AaeL_AAEL006904 [Aedes aegypti]	3.23693	up	0.000161584	5.0693e-06		3.72518	up	1.00366e-05	3.3223e-07	0.868933	-	no IPS match	conserved hypothetical protein [Source:VB External Description;Acc:AAEL002797]
AAEL002781-RB	galactokinase 1	3.23688	up	0.00174969	0.000567288		2.84045	up	5.9252e-05	8.7961e-06	1.13956	P:auxin biosynthetic process; F:ATPase activity, coupled to transmembrane movement of substances; F:ATP binding; C:integral to membrane; C:ATP-binding cassette (ABC) transporter complex	IPR003439; IPR003593; IPR013525; IPR017871; IPR020064; G3DSA:3.40.50.300 (GENE3D), PTHR19241 (PANTHER), SSF52540 (SUPERFAMILY)	ABC transporter [Source:VB External Description;Acc:AAEL008138]
AAEL011746-RB	succinyl-coa synthetase beta chain	3.23217	up	0.00206552	0.00071567		3.17914	up	0.000179596	4.55172e-05	1.01668	P:regulation of transcription from RNA polymerase II promoter; P:transcription initiation from RNA polymerase II promoter; F:cyclin-dependent protein kinase regulator activity; C:nuclear cyclin-dependent protein kinase holoenzyme complex; F:RNA polymerase II transcription mediator activity; F:protein binding; P:G1/S transition of mitotic cell cycle; C:mediator complex; C:membrane	IPR003492; IPR016196; IPR018460; G3DSA:1.20.1250.20 (GENE3D)	cln3/battenin [Source:VB External Description;Acc:AAEL009909]
AAEL011036-RA	adult cuticle	3.23162	up	0.00239062	0.000878691		4.24766	up	7.5525e-05	1.27231e-05	0.7608	C:cytosol; C:integral to membrane	IPR007248	peroxisomal membrane protein 2, pxmp2 [Source:VB External Description;Acc:AAEL006538]
AAEL005325-RA	dopachrome-conversion enzyme	3.23117	up	0.00172219	0.000553312		5.07787	up	0.00046191	0.000161654	0.636324	-	IPR000615; IPR021134; PTHR10736:SF0 (PANTHER)	bestrophin 2,3,4 [Source:VB External Description;Acc:AAEL003145]
AAEL012571-RA	hypothetical protein AaeL_AAEL012571 [Aedes aegypti]	3.22833	up	0.000134638	2.67231e-06		2.6153	up	2.94808e-05	2.73019e-06	1.2344	F:structural constituent of cuticle	IPR000618; PTHR24637 (PANTHER), PTHR24637:SF51 (PANTHER)	conserved hypothetical protein [Source:VB External Description;Acc:AAEL013984]
AAEL007997-RA	retinaldehyde-binding protein 1-like protein 1	3.22365	up	0.00024066	1.52091e-05		3.16962	up	2.92386e-05	2.67081e-06	1.01704	-	G3DSA:3.80.10.10 (GENE3D), seg (SEG), SSF52047 (SUPERFAMILY)	hypothetical protein [Source:VB External Description;Acc:AAEL002854]
AAEL008420-RA	hypothetical protein AaeL_AAEL008420 [Aedes aegypti]	3.22338	up	0.00190811	0.000641725		3.57905	up	0.000461401	0.0001614	0.900625	-	seg (SEG), SignalP-NN(euk) (SIGNALP)	conserved hypothetical protein [Source:VB External Description;Acc:AAEL012317]
AAEL011177-RA	isoform b	3.22125	up	0.00144418	0.000432793		3.80003	up	4.87912e-05	6.412e-06	0.847691	-	no IPS match	conserved hypothetical protein [Source:VB External Description;Acc:AAEL001013]
AAEL006989-RA	cytochrome p450 CYP6AG7	3.21972	up	0.000654879	0.000124846		2.73521	up	0.000102175	2.03733e-05	1.17714	F:protein binding; P:multicellular organismal development; P:ubiquitin-dependent protein catabolic process; C:nucleus; F:zinc ion binding	IPR001841; IPR004162; IPR008974; IPR013010; IPR013083; IPR013323; IPR018121; PTHR10315:SF10 (PANTHER), SSF57850 (SUPERFAMILY)	conserved hypothetical protein [Source:VB External Description;Acc:AAEL005826]
AAEL012955-RA	phosphatidylethanolamine-binding protein	3.21809	up	0.000397041	4.92369e-05		3.64971	up	4.17843e-05	4.96238e-06	0.881739	F:molecular_function; P:biological_process	IPR016196; PTHR16172 (PANTHER), PF12832 (PFAM), PS51257 (PROFILE)	conserved hypothetical protein [Source:VB External Description;Acc:AAEL003135]
AAEL001561-RA	hypothetical protein AaeL_AAEL001561 [Aedes aegypti]	3.21767	up	0.000244583	1.5901e-05		3.62406	up	2.6018e-05	2.18926e-06	0.887863	C:extracellular region; F:chitin binding; P:chitin metabolic process	IPR002557	conserved hypothetical protein [Source:VB External Description;Acc:AAEL006701]
AAEL005706-RA	hormone-sensitive lipase	3.20682	up	0.000401314	5.06437e-05		2.94815	up	0.000727316	0.000284309	1.08774	C:extracellular region	IPR001283; IPR002413; IPR014044; PTHR10334:SF4 (PANTHER)	venom allergen [Source:VB External Description;Acc:AAEL005531]
AAEL010348-RA	sugar transporter	3.20637	up	0.000320912	3.10783e-05		2.77108	up	0.000878181	0.000356709	1.15708	F:DNA binding; C:nucleus; F:zinc ion binding; P:regulation of transcription, DNA-dependent; F:cytochrome-c oxidase activity	seg (SEG)	cytochrome c oxidase, subunit VIIC, putative [Source:VB External Description;Acc:AAEL002737]
AAEL015014-RB	transmembrane protein 135	3.20582	up	0.000280066	2.26407e-05		3.82512	up	8.68052e-05	1.59232e-05	0.838095	-	no IPS match	hypothetical protein [Source:VB External Description;Acc:AAEL008304]
AAEL001471-RA	oxidative stress protein	3.2042	up	0.000309623	2.80493e-05		2.96101	up	5.47941e-05	7.64971e-06	1.08213	-	no IPS match	conserved hypothetical protein [Source:VB External Description;Acc:AAEL005669]
AAEL000565-RA	isoform b	3.20217	up	0.0011795	0.000316769		2.59582	up	0.000136275	3.14104e-05	1.23359	-	no IPS match	hypothetical protein [Source:VB External Description;Acc:AAEL013224]
AAEL014893-RA	cytochrome p450 CYP6BB2	3.20163	up	0.00219906	0.000781826		3.95924	up	8.97972e-06	2.8363e-07	0.808647	-	seg (SEG)	hypothetical protein [Source:VB External Description;Acc:AAEL010416]
AAEL001480-RA	phosphoglucomutase 2	3.19951	up	0.00153119	0.000471206		2.60767	up	0.000179807	4.56979e-05	1.22696	-	seg (SEG)	hypothetical protein [Source:VB External Description;Acc:AAEL006968]
AAEL009140-RA	hypothetical protein AaeL_AAEL009140 [Aedes aegypti]	3.19818	up	0.000406694	5.17211e-05		3.04176	up	0.000456435	0.000159161	1.05142	P:proteolysis; F:serine-type endopeptidase activity	IPR001254; IPR001314; IPR009003; IPR018114; G3DSA:2.40.10.10 (GENE3D), PTHR24260 (PANTHER), PTHR24260:SF203 (PANTHER)	conserved hypothetical protein [Source:VB External Description;Acc:AAEL015533]
AAEL000074-RA	serine protease	3.19718	up	0.000383571	4.59608e-05		2.62176	up	2.12024e-05	1.46402e-06	1.21948	F:catalytic activity; P:metabolic process; F:binding	IPR004262; IPR013120; IPR016040; PTHR11011 (PANTHER), PTHR11011:SF18 (PANTHER), SSF51735 (SUPERFAMILY)	conserved hypothetical protein [Source:VB External Description;Acc:AAEL000871]
AAEL009198-RB	major facilitator superfamily domain-containing protein 8-like	3.19549	up	0.00681946	0.00338909		3.49252	up	1.00226e-05	3.28701e-07	0.914952	C:lysosome; P:sphingolipid metabolic process; P:dsRNA transport	IPR003119; IPR007856; IPR008138; IPR008139; IPR008373; IPR011001; PTHR11480 (PANTHER), PTHR11480:SF3 (PANTHER)	saposin [Source:VB External Description;Acc:AAEL003046]
AAEL009198-RA	major facilitator superfamily domain-containing protein 8-like	3.19445	up	0.00793665	0.00409377		3.44408	up	4.25916e-06	4.09551e-08	0.927519	F:oxidoreductase activity; P:oxidation reduction; F:binding	IPR002198; IPR002347; IPR016040; PIRSF000126 (PIR), PTHR24316 (PANTHER), PTHR24316:SF38 (PANTHER), SSF51735 (SUPERFAMILY)	steroid dehydrogenase [Source:VB External Description;Acc:AAEL009634]
AAEL001078-RA	glutathione s transferase d1	3.18977	up	0.0019056	0.000639865		3.29895	up	3.62967e-05	3.98574e-06	0.966905	F:actin binding; P:cytoskeleton organization	IPR003128; IPR007122; IPR007123; IPR015628; G3DSA:3.40.20.10 (GENE3D), SSF55753 (SUPERFAMILY), SSF82754 (SUPERFAMILY)	supervillin [Source:VB External Description;Acc:AAEL003105]
AAEL010769-RA	serine protease serpin	3.18058	up	0.000474523	7.03862e-05		2.19259	up	0.00204324	0.00100084	1.4506	F:heme binding; P:oxidation reduction; F:monooxygenase activity; F:electron carrier activity	IPR001128; IPR002401; IPR017972; PTHR24290 (PANTHER), PTHR24290:SF187 (PANTHER)	cytochrome P450 [Source:VB External Description;Acc:AAEL009129]
AAEL005340-RA	major allergen bla g	3.18024	up	0.00215282	0.000758841		3.57833	up	0.000140269	3.26616e-05	0.888749	F:transferase activity, transferring acyl groups other than amino-acyl groups; P:system process; P:digestion	IPR002656; IPR006621; PTHR11161 (PANTHER)	conserved hypothetical protein [Source:VB External Description;Acc:AAEL004824]
AAEL010537-RA	maltase 1	3.17721	up	0.000605497	0.000109126		3.54461	up	5.42255e-05	7.52923e-06	0.896348	P:trehalose metabolic process; F:alpha,alpha-trehalase activity	IPR001661; IPR008928; IPR018232	alpha,alpha-trehalase [Source:VB External Description;Acc:AAEL009658]
AAEL010292-RA	isoform e	3.17249	up	0.0095522	0.00515295		2.51618	up	0.000386354	0.000127646	1.26084	F:nucleic acid binding; C:nucleus; F:zinc ion binding	IPR006616; IPR012934; PF11901 (PFAM), SSF57716 (SUPERFAMILY)	hypothetical protein [Source:VB External Description;Acc:AAEL010392]
AAEL004307-RB	n-myc downstream regulated	3.17129	up	0.000480814	7.19866e-05		2.65716	up	0.000412766	0.000138979	1.19349	-	no IPS match	conserved hypothetical protein [Source:VB External Description;Acc:AAEL010529]
AAEL011516-RA	hypothetical protein AaeL_AAEL011516 [Aedes aegypti]	3.16937	up	0.00024892	1.67391e-05		3.44239	up	0.00045277	0.000157654	0.920688	F:oxidoreductase activity; P:oxidation reduction; F:binding	IPR002198; IPR002347; IPR016040; PIRSF000126 (PIR), PTHR24316 (PANTHER), PTHR24316:SF38 (PANTHER), SSF51735 (SUPERFAMILY)	steroid dehydrogenase [Source:VB External Description;Acc:AAEL009634]
AAEL012901-RA	hypothetical protein AaeL_AAEL012901 [Aedes aegypti]	3.16934	up	0.000227427	1.2929e-05		2.88897	up	5.93675e-05	8.83403e-06	1.09705	F:heme binding; P:oxidation reduction; F:monooxygenase activity; F:electron carrier activity	IPR001128; IPR002401; IPR017972; PTHR24292 (PANTHER), PTHR24292:SF175 (PANTHER)	cytochrome P450 [Source:VB External Description;Acc:AAEL014608]
AAEL000744-RA	troponin c	3.16751	up	0.000260007	2.00199e-05		3.19226	up	7.93048e-06	2.1083e-07	0.992245	F:hydrolase activity; C:lipid particle	SignalP-NN(euk) (SIGNALP)	conserved hypothetical protein [Source:VB External Description;Acc:AAEL008664]
AAEL005986-RA	hypothetical protein AaeL_AAEL005986 [Aedes aegypti]	3.16061	up	0.00802857	0.00416085		3.58465	up	0.000919197	0.000377899	0.881707	-	IPR019149; G3DSA:3.40.50.1820 (GENE3D), PTHR13617 (PANTHER), PTHR13617:SF5 (PANTHER), SSF53474 (SUPERFAMILY)	conserved hypothetical protein [Source:VB External Description;Acc:AAEL005342]
AAEL014623-RA	hypothetical protein AaeL_AAEL014623 [Aedes aegypti]	3.15953	up	7.36179e-05	1.31474e-07		5.96418	up	0.00228036	0.00113341	0.529751	F:heme binding; P:oxidation reduction; F:monooxygenase activity; F:electron carrier activity	IPR001128; IPR002401; IPR017972; PTHR24292 (PANTHER), PTHR24292:SF131 (PANTHER)	cytochrome P450 [Source:VB External Description;Acc:AAEL012492]
AAEL001561-RB	hypothetical protein AaeL_AAEL001561 [Aedes aegypti]	3.15724	up	0.000161584	4.98798e-06		3.61594	up	2.26934e-05	1.68006e-06	0.873145	F:sterol binding	IPR003033; G3DSA:3.30.1050.10 (GENE3D)	conserved hypothetical protein [Source:VB External Description;Acc:AAEL012704]
AAEL006437-RA	dnaj homolog subfamily c member 21-like	3.15456	up	0.000788314	0.00017077		2.73313	up	0.000276773	8.20003e-05	1.15419	C:integral to membrane; P:transmembrane transport; F:transporter activity; P:carbohydrate transport	no IPS match	sugar transporter [Source:VB External Description;Acc:AAEL011368]
AAEL006961-RA	isoform b	3.15322	up	0.00128783	0.00036369		2.8706	up	0.000113191	2.38252e-05	1.09845	C:membrane; P:proteolysis	IPR001375; IPR002469; G3DSA:2.140.10.30 (GENE3D), G3DSA:3.40.50.1820 (GENE3D), PTHR11731 (PANTHER), PTHR11731:SF9 (PANTHER), SSF53474 (SUPERFAMILY), SSF82171 (SUPERFAMILY)	dipeptidyl-peptidase [Source:VB External Description;Acc:AAEL008373]
AAEL009909-RB	cln3 battenin	3.14685	up	0.0010856	0.00027958		3.29793	up	7.04969e-05	1.15164e-05	0.954189	-	IPR006596; IPR014881; IPR017117; PTHR12814 (PANTHER), SSF144206 (SUPERFAMILY)	conserved hypothetical protein [Source:VB External Description;Acc:AAEL005628]
AAEL009424-RA	serine threonine-protein kinase rio3 (rio kinase 3)	3.14638	up	0.000473602	6.99881e-05		2.36357	up	9.86814e-05	1.93373e-05	1.3312	-	no IPS match	predicted protein [Source:VB External Description;Acc:AAEL001263]
AAEL015014-RA	transmembrane protein 135	3.14359	up	0.000753534	0.000159071		3.72298	up	0.000238663	6.63071e-05	0.844375	C:cytosol; F:kinesin binding; F:identical protein binding; C:NuA4 histone acetyltransferase complex; F:ATP binding; C:actin cytoskeleton; F:nitric-oxide synthase binding; P:cellular component movement; F:structural constituent of cytoskeleton; C:ribonucleoprotein complex; C:MLL5-L complex	seg (SEG)	actin [Source:VB External Description;Acc:AAEL004646]
AAEL013377-RA	adult cuticle	3.12455	up	0.00253947	0.000954558		4.19545	up	0.000107962	2.21244e-05	0.744748	F:heme binding; P:oxidation reduction; F:monooxygenase activity; F:electron carrier activity	IPR001128; IPR002401; IPR017972; PTHR24305 (PANTHER), PTHR24305:SF164 (PANTHER)	cytochrome P450 [Source:VB External Description;Acc:AAEL007798]
AAEL000028-RA	serine protease 14	3.1174	up	0.000320912	3.03121e-05		2.77214	up	3.59703e-05	3.92651e-06	1.12454	F:nucleic acid binding; C:nucleus; F:zinc ion binding	IPR006612; IPR012934; IPR015880; SSF57716 (SUPERFAMILY)	hypothetical protein [Source:VB External Description;Acc:AAEL003008]
AAEL005175-RA	isoform c	3.11548	up	0.00109186	0.000281996		3.62261	up	5.79542e-05	8.47041e-06	0.86001	P:G-protein coupled receptor protein signaling pathway; C:integral to membrane; P:signal transduction; F:G-protein coupled amine receptor activity	no IPS match	G-protein coupled receptor [Source:VB External Description;Acc:AAEL010929]
AAEL010572-RA	mitogen-activated protein-binding protein-interacting protein	3.1037	up	0.000924752	0.000219293		2.41169	up	0.000781621	0.000311463	1.28694	-	no IPS match	hypothetical protein [Source:VB External Description;Acc:AAEL013223]
AAEL002854-RA	hypothetical protein AaeL_AAEL002854 [Aedes aegypti]	3.10095	up	0.000173408	6.29251e-06		3.02832	up	0.000224161	6.05503e-05	1.02399	F:serine-type endopeptidase activity; P:proteolysis	IPR001254; IPR001314; IPR006604; IPR009003; IPR018114; IPR022700; G3DSA:2.40.10.10 (GENE3D), PTHR24268 (PANTHER), PTHR24268:SF230 (PANTHER)	Clip-domain serine protease, family B. [Source:VB External Description;Acc:AAEL000074]
AAEL003789-RA	exportin 6	3.09944	up	0.000112781	1.02239e-06		3.11505	up	8.75255e-05	1.61007e-05	0.994989	-	seg (SEG), SignalP-NN(euk) (SIGNALP), tmhmm (TMHMM)	conserved hypothetical protein [Source:VB External Description;Acc:AAEL014234]
AAEL009909-RA	cln3 battenin	3.07586	up	0.000396689	4.90393e-05		3.2186	up	2.19988e-05	1.55923e-06	0.955654	F:substrate-specific transmembrane transporter activity; C:integral to membrane; P:transmembrane transport; P:carbohydrate transport	IPR003663; IPR005828; IPR005829; IPR016196; IPR020846; G3DSA:1.20.1250.20 (GENE3D), PTHR24063 (PANTHER), PTHR24063:SF13 (PANTHER)	sugar transporter [Source:VB External Description;Acc:AAEL001257]
AAEL004048-RA	unc93a protein	3.0744	up	0.000175438	6.50199e-06		2.6713	up	1.97445e-05	1.24076e-06	1.1509	F:FAD binding; F:oxidoreductase activity, acting on CH-OH group of donors; P:alcohol metabolic process	IPR000172; IPR007867; IPR012132; G3DSA:3.30.560.10 (GENE3D), G3DSA:3.50.50.60 (GENE3D), G3DSA:4.10.450.10 (GENE3D), PTHR11552 (PANTHER), PTHR11552:SF10 (PANTHER), SSF51905 (SUPERFAMILY), SSF54373 (SUPERFAMILY)	glucose dehydrogenase [Source:VB External Description;Acc:AAEL011806]
AAEL003187-RA	carboxylesterase	3.07375	up	0.00102887	0.000258416		3.22508	up	4.16309e-05	4.9389e-06	0.953077	P:transport; F:lipid binding; F:transporter activity	IPR000566; IPR002969; IPR011038; IPR012674; IPR022272; PTHR10612 (PANTHER), PTHR10612:SF4 (PANTHER)	apolipoprotein D, putative [Source:VB External Description;Acc:AAEL013574]
AAEL000719-RA	pak-interacting exchange beta-pix cool-1	3.07064	up	0.000303339	2.70863e-05		2.88165	up	7.33074e-05	1.21886e-05	1.06558	-	IPR010490	component of oligomeric golgi complex [Source:VB External Description;Acc:AAEL003980]
AAEL002334-RA	eukaryotic translation initiation factor 3 subunit 6	3.06917	up	0.00228197	0.000820581		2.90081	up	0.000351672	0.000112972	1.05804	P:oxidation reduction; F:glutathione peroxidase activity; P:response to oxidative stress	IPR000889; IPR012336	glutathione peroxidase [Source:VB External Description;Acc:AAEL008397]
AAEL001561-RD	hypothetical protein AaeL_AAEL001561 [Aedes aegypti]	3.06621	up	0.000277262	2.22992e-05		3.52422	up	3.32233e-05	3.3748e-06	0.87004	F:zinc ion binding; F:protein binding	SignalP-NN(euk) (SIGNALP)	conserved hypothetical protein [Source:VB External Description;Acc:AAEL000456]
AAEL006271-RC	superoxide dismutase	3.06018	up	0.00114011	0.000301579		2.55781	up	0.00112519	0.000485188	1.19641	F:glycolipid transporter activity; C:cytoplasm; F:glycolipid binding; P:glycolipid transport	IPR014830; PTHR10219 (PANTHER), PTHR10219:SF4 (PANTHER)	conserved hypothetical protein [Source:VB External Description;Acc:AAEL004682]
AAEL011458-RA	cuticular protein 72ec	3.05983	up	0.000222363	1.23959e-05		2.93986	up	0.000229433	6.26702e-05	1.04081	-	no IPS match	conserved hypothetical protein [Source:VB External Description;Acc:AAEL014274]
AAEL001647-RA	cg6734 cg6734-pa	3.05545	up	0.0011713	0.000312883		2.64674	up	0.000258879	7.46382e-05	1.15442	-	no IPS match	conserved hypothetical protein [Source:VB External Description;Acc:AAEL011768]
AAEL014439-RA	juvenile hormone-inducible	3.05159	up	0.00024066	1.52157e-05		4.00909	up	8.34977e-06	2.39469e-07	0.761166	F:translation initiation factor activity; C:cytosol; P:auxin biosynthetic process; P:regulation of translation; C:precatalytic spliceosome; F:elongation factor-2 kinase activity; F:ATP binding; P:nuclear mRNA splicing, via spliceosome; C:catalytic step 2 spliceosome; P:protein amino acid phosphorylation	IPR000719; IPR006575; IPR008271; IPR011009; IPR016135; IPR017441; IPR017442; G3DSA:1.10.510.10 (GENE3D), G3DSA:3.30.200.20 (GENE3D), G3DSA:3.30.930.10 (GENE3D), PTHR11042 (PANTHER), PTHR11042:SF34 (PANTHER), SSF55681 (SUPERFAMILY)	eukaryotic translation initiation factor 2-alpha kinase [Source:VB External Description;Acc:AAEL000924]
AAEL014609-RA	cytochrome p450 CYP9J26	3.05101	up	0.000493649	7.45735e-05		3.97658	up	0.00013549	3.11361e-05	0.767246	C:nucleus; F:DNA binding	no IPS match	conserved hypothetical protein [Source:VB External Description;Acc:AAEL012076]
AAEL009462-RA	hydroxyacylglutathione hydrolase	3.04921	up	0.000843332	0.000188773		2.28954	up	2.37242e-05	1.88527e-06	1.3318	-	PTHR12336 (PANTHER)	conserved hypothetical protein [Source:VB External Description;Acc:AAEL002233]
AAEL001511-RA	hypothetical protein AaeL_AAEL001511 [Aedes aegypti]	3.04704	up	0.00603629	0.00291609		2.26277	up	0.00711616	0.00428768	1.3466	F:sequence-specific DNA binding; F:protein dimerization activity; F:transcription factor activity; C:nucleus; P:regulation of transcription, DNA-dependent	IPR011700; G3DSA:1.20.5.170 (GENE3D), PTHR21051 (PANTHER), PTHR21051:SF1 (PANTHER)	conserved hypothetical protein [Source:VB External Description;Acc:AAEL007444]
AAEL006190-RA	juvenile hormone-inducible	3.04702	up	0.000861625	0.000195824		3.31117	up	0.000121455	2.62858e-05	0.920225	F:DNA binding	seg (SEG), tmhmm (TMHMM)	hypothetical protein [Source:VB External Description;Acc:AAEL008049]
AAEL001898-RA	isoform e	3.04612	up	7.36179e-05	2.53394e-07		2.59486	up	4.6844e-05	6.04266e-06	1.17391	-	no IPS match	programmed cell death [Source:VB External Description;Acc:AAEL005832]
AAEL005324-RA		3.04527	up	0.000240526	1.48378e-05		2.53523	up	3.59349e-05	3.90449e-06	1.20118	-	no IPS match	hypothetical protein [Source:VB External Description;Acc:AAEL008355]
AAEL002231-RA	cuticle	3.03934	up	0.00197303	0.000670085		2.39213	up	4.87912e-05	6.39875e-06	1.27056	-	PTHR12336 (PANTHER)	conserved hypothetical protein [Source:VB External Description;Acc:AAEL002187]
AAEL005135-RA	hypothetical protein AaeL_AAEL005135 [Aedes aegypti]	3.03815	up	0.00288364	0.00114293		2.76634	up	0.000145388	3.42026e-05	1.09825	F:glycolipid transporter activity; C:cytoplasm; F:glycolipid binding; P:glycolipid transport	IPR014830; PTHR10219 (PANTHER), PTHR10219:SF4 (PANTHER)	conserved hypothetical protein [Source:VB External Description;Acc:AAEL004684]
AAEL006113-RA	isoform a	3.03766	up	0.000269471	2.11825e-05		3.08234	up	0.000109923	2.29011e-05	0.985506	-	PTHR12326 (PANTHER), PTHR12326:SF3 (PANTHER)	conserved hypothetical protein [Source:VB External Description;Acc:AAEL012137]
AAEL001498-RA	hypothetical protein AaeL_AAEL001498 [Aedes aegypti]	3.03047	up	0.00694569	0.00346434		4.7527	up	0.000231851	6.36236e-05	0.637631	F:heme binding; P:oxidation reduction; F:monooxygenase activity; F:electron carrier activity	IPR001128; IPR002401; IPR017972; PTHR24292 (PANTHER), PTHR24292:SF175 (PANTHER)	cytochrome P450 [Source:VB External Description;Acc:AAEL006814]
AAEL014766-RA	hypothetical protein AaeL_AAEL014766 [Aedes aegypti]	3.02958	up	0.00160454	0.000502475		2.21985	up	0.000217989	5.84151e-05	1.36477	C:cytoplasm; F:iron ion binding; P:oxidation reduction; P:inositol catabolic process; F:inositol oxygenase activity	IPR007828; SSF109604 (SUPERFAMILY)	myoinositol oxygenase [Source:VB External Description;Acc:AAEL008701]
AAEL002638-RA	cytochrome p450 CYP9J6	3.02752	up	0.000170386	5.91656e-06		3.20209	up	7.65432e-06	1.5551e-07	0.945485	P:regulation of membrane potential; P:potassium ion transport; C:integral to membrane; F:G-protein activated inward rectifier potassium channel activity	IPR001838; IPR013518; IPR013521; IPR014756; IPR016449; G3DSA:1.10.287.70 (GENE3D), PTHR11767:SF23 (PANTHER), SSF81324 (SUPERFAMILY)	inwardly rectifying k+ channel, [Source:VB External Description;Acc:AAEL008928]
AAEL007408-RA	isoform i	3.02143	up	0.000503433	7.75936e-05		2.67973	up	0.00555206	0.00323163	1.12751	-	PS51257 (PROFILE)	hypothetical protein [Source:VB External Description;Acc:AAEL000995]
AAEL005985-RA	autophagy-related protein 13 homolog	3.01765	up	0.00036739	4.14562e-05		3.01393	up	0.000792883	0.000317253	1.00123	C:integral to membrane; F:CDP-alcohol phosphatidyltransferase activity; P:phospholipid biosynthetic process	IPR000462; PTHR14269 (PANTHER), PTHR14269:SF3 (PANTHER)	cdp-diacylglycerol--glycerol-3-phosphate 3-phosphatidyltransferase [Source:VB External Description;Acc:AAEL012719]
AAEL007495-RA	phosphoglycerate mutase	3.01646	up	0.00179245	0.000587456		3.12673	up	0.000230707	6.3193e-05	0.964733	F:hydrolase activity; F:nucleic acid binding; F:metal ion binding	IPR001604; IPR020821; PTHR13966 (PANTHER), SSF54060 (SUPERFAMILY)	deoxyribonuclease I, putative [Source:VB External Description;Acc:AAEL008857]
AAEL008869-RA	pupal cuticle protein	3.01402	up	0.000455431	6.5508e-05		2.81793	up	0.000202595	5.33428e-05	1.06959	C:intracellular; P:transport; F:transporter activity	IPR001071; IPR001251; IPR008273; IPR011074; G3DSA:1.10.8.20 (GENE3D), PTHR10174 (PANTHER), PTHR10174:SF28 (PANTHER)	conserved hypothetical protein [Source:VB External Description;Acc:AAEL007984]
AAEL014636-RA	af217287_1 g protein	3.01353	up	0.000546258	9.08293e-05		2.79956	up	0.00284223	0.00147609	1.07643	-	no IPS match	hypothetical protein [Source:VB External Description;Acc:AAEL012849]
AAEL007306-RA	alpha isoform b	3.01253	up	0.000441747	6.10501e-05		2.67068	up	7.07533e-05	1.15941e-05	1.128	F:serine-type endopeptidase activity; P:proteolysis	IPR001254; IPR001314; IPR009003; G3DSA:2.40.10.10 (GENE3D), PTHR24258 (PANTHER), PTHR24258:SF181 (PANTHER)	serine-type enodpeptidase, [Source:VB External Description;Acc:AAEL011888]
AAEL005691-RA	protein serine threonine	3.01196	up	0.00302235	0.00121642		3.91552	up	0.00102072	0.000430339	0.769236	C:cell surface; C:phosphopyruvate hydratase complex; C:lipid particle; F:phosphopyruvate hydratase activity; F:magnesium ion binding; P:glycolysis	IPR000941; IPR020809; IPR020810; IPR020811; G3DSA:3.20.20.120 (GENE3D), G3DSA:3.30.390.10 (GENE3D), PTHR11902 (PANTHER), SSF51604 (SUPERFAMILY), SSF54826 (SUPERFAMILY)	enolase [Source:VB External Description;Acc:AAEL001668]
AAEL009420-RA	cd36 antigen	3.01124	up	0.000688348	0.000135713		3.19168	up	9.5143e-05	1.82588e-05	0.943466	F:protein binding	IPR001611; IPR003591; G3DSA:3.80.10.10 (GENE3D), PTHR23155 (PANTHER), PTHR23155:SF92 (PANTHER), PF12799 (PFAM), SSF52058 (SUPERFAMILY)	internalin A, putative [Source:VB External Description;Acc:AAEL005221]
AAEL003148-RA	short-chain dehydrogenase	3.00888	up	0.0011874	0.000320404		2.5322	up	3.73005e-05	4.17069e-06	1.18825	-	IPR005031; IPR023393; PTHR12901 (PANTHER), seg (SEG), SignalP-NN(euk) (SIGNALP), SSF55961 (SUPERFAMILY)	conserved hypothetical protein [Source:VB External Description;Acc:AAEL003452]
AAEL007012-RA	hypothetical protein AaeL_AAEL007012 [Aedes aegypti]	3.00606	up	0.000546576	9.15342e-05		3.06366	up	0.000227228	6.15511e-05	0.981199	F:pyridoxal phosphate binding; F:L-tyrosine:2-oxoglutarate aminotransferase activity; F:1-aminocyclopropane-1-carboxylate synthase activity; P:biosynthetic process; P:aromatic amino acid family metabolic process	IPR001176; IPR004838; IPR004839; IPR005957; IPR005958; IPR015421; IPR015422; IPR015424; IPR021178; PTHR11751 (PANTHER), PTHR11751:SF28 (PANTHER)	tyrosine aminotransferase [Source:VB External Description;Acc:AAEL008963]
AAEL009964-RA	h+ transporting atp synthase subunit e	3.00575	up	0.000722714	0.000147462		2.90835	up	0.000310079	9.55898e-05	1.03349	P:mitotic spindle organization; C:centrosome; P:tricarboxylic acid cycle; C:succinate-CoA ligase complex (ADP-forming); F:succinate-CoA ligase (ADP-forming) activity; F:ATP binding; P:regulation of centrosome duplication	IPR005809; IPR005811; IPR011761; IPR013650; IPR013815; IPR013816; IPR016102; IPR017866; SSF56059 (SUPERFAMILY)	succinyl-coa synthetase beta chain [Source:VB External Description;Acc:AAEL011746]
AAEL005749-RA	lysosomal alpha-mannosidase (mannosidase alpha class 2b member 1)	3.00369	up	0.00423595	0.0018673		5.05986	up	0.000265198	7.70632e-05	0.593631	F:serine-type carboxypeptidase activity; P:proteolysis	IPR001563; IPR018202; G3DSA:3.40.50.1820 (GENE3D), SSF53474 (SUPERFAMILY)	retinoid-inducible serine carboxypeptidase (serine carboxypeptidase [Source:VB External Description;Acc:AAEL006542]
AAEL012440-RA	sodium-bile acid cotransporter	3.00152	up	0.000379044	4.40716e-05		2.42274	up	0.000957188	0.000397054	1.2389	-	no IPS match	hypothetical protein [Source:VB External Description;Acc:AAEL007905]
AAEL007787-RA	5-aminolevulinic acid synthase	3.00126	up	0.00121124	0.000329894		2.65834	up	6.19581e-06	1.02776e-07	1.129	P:amino acid transport	IPR005282; IPR006603; PTHR13131 (PANTHER), PTHR13131:SF5 (PANTHER), PF04193 (PFAM)	cystinosin [Source:VB External Description;Acc:AAEL006113]
AAEL011561-RA	isoform a	2.99682	up	0.000453032	6.44877e-05		2.77663	up	4.30997e-05	5.21662e-06	1.0793	-	no IPS match	hypothetical protein [Source:VB External Description;Acc:AAEL014166]
AAEL006021-RA	su isoform a	2.99477	up	0.000383571	4.58389e-05		2.72965	up	0.000256052	7.35304e-05	1.09713	P:auxin biosynthetic process; F:ATP-dependent RNA helicase activity; F:nucleic acid binding; P:regulation of alternative nuclear mRNA splicing, via spliceosome; F:ATP binding; C:nucleus	IPR000629; IPR001650; IPR011545; IPR014001; IPR014014; G3DSA:3.40.50.300 (GENE3D), PTHR24031 (PANTHER), PTHR24031:SF15 (PANTHER), SSF52540 (SUPERFAMILY)	DEAD box ATP-dependent RNA helicase [Source:VB External Description;Acc:AAEL014904]
AAEL015458-RA	transferrin precursor	2.99431	up	0.000193239	8.90196e-06		3.25663	up	0.00209599	0.00103144	0.919452	P:carbohydrate metabolic process; F:hydrolase activity, hydrolyzing O-glycosyl compounds; F:cation binding	seg (SEG)	glycoside hydrolases [Source:VB External Description;Acc:AAEL015022]
AAEL014625-RA	hypothetical protein AaeL_AAEL014625 [Aedes aegypti]	2.98144	up	0.00756428	0.00384145		2.89174	up	0.00113419	0.000489645	1.03102	F:structural constituent of cuticle	IPR000618; PTHR12236 (PANTHER)	conserved hypothetical protein [Source:VB External Description;Acc:AAEL011036]
AAEL014735-RA	isoform a	2.98104	up	0.000258792	1.88813e-05		2.63934	up	2.4154e-05	1.96223e-06	1.12946	F:heme binding; P:oxidation reduction; F:monooxygenase activity; F:electron carrier activity	IPR001128; IPR002401; IPR017972; PTHR24292 (PANTHER), PTHR24292:SF175 (PANTHER)	cytochrome P450 [Source:VB External Description;Acc:AAEL014612]
AAEL006862-RA	uncharacterized mfs-type transporter c19orf28 homolog	2.98086	up	0.000320912	3.04801e-05		2.79568	up	0.000281958	8.41778e-05	1.06624	-	no IPS match	conserved hypothetical protein [Source:VB External Description;Acc:AAEL007734]
AAEL005043-RA	multidrug resistance-associated protein 1	2.97567	up	0.00135392	0.000392806		2.50799	up	0.000303981	9.32875e-05	1.18648	-	IPR007614	conserved hypothetical protein [Source:VB External Description;Acc:AAEL001677]
AAEL012719-RA	cdp-diacylglycerol--glycerol-3-phosphate 3-phosphatidyltransferase	2.97251	up	0.000175438	6.5016e-06		2.70187	up	0.000133	3.028e-05	1.10017	P:transmembrane transport	IPR011701; IPR016196; G3DSA:1.20.1250.20 (GENE3D), PTHR23038 (PANTHER), PTHR23038:SF2 (PANTHER), seg (SEG), tmhmm (TMHMM)	adenylate cyclase [Source:VB External Description;Acc:AAEL001687]
AAEL002807-RA	hypothetical protein AaeL_AAEL002807 [Aedes aegypti]	2.97057	up	0.00148544	0.000452075		2.54686	up	0.00040123	0.00013398	1.16636	-	no IPS match	hypothetical protein [Source:VB External Description;Acc:AAEL000555]
AAEL003622-RB	delta -desaturase	2.96773	up	0.000738255	0.00015307		3.38795	up	0.00012152	2.63152e-05	0.875966	P:chitin-based embryonic cuticle biosynthetic process; P:chitin-based cuticle attachment to epithelium; C:apical part of cell	no IPS match	hypothetical protein [Source:VB External Description;Acc:AAEL014226]
AAEL010222-RA	gata transcription factor	2.96595	up	0.00174822	0.000566176		3.10643	up	0.000293031	8.90753e-05	0.954778	F:receptor activity; P:biological_process; C:cellular_component	IPR007262; SignalP-NN(euk) (SIGNALP), tmhmm (TMHMM)	conserved hypothetical protein [Source:VB External Description;Acc:AAEL014484]
AAEL006525-RA	kelch domain-containing protein 3	2.96518	up	0.000524248	8.32011e-05		3.1403	up	0.000295245	8.97858e-05	0.944236	P:mitotic spindle organization	IPR019339; IPR022209; PTHR16196 (PANTHER)	conserved hypothetical protein [Source:VB External Description;Acc:AAEL002384]
AAEL004942-RA	isoform d	2.95918	up	0.00648729	0.00318324		2.52714	up	8.54302e-05	1.55534e-05	1.17096	F:molecular_function; C:cellular_component	IPR013024; IPR017939; SSF110857 (SUPERFAMILY)	conserved hypothetical protein [Source:VB External Description;Acc:AAEL000186]
AAEL005733-RB	myosin heavy nonmuscle or smooth muscle	2.95707	up	0.00060622	0.000109479		2.44464	up	8.82189e-05	1.62617e-05	1.20962	F:kinase activity	IPR001810; IPR022364; G3DSA:3.80.10.10 (GENE3D), PTHR23125 (PANTHER), PTHR23125:SF34 (PANTHER), PF12937 (PFAM), SSF52047 (SUPERFAMILY)	S-phase kinase-associated protein 2 (skp2), putative [Source:VB External Description;Acc:AAEL005068]
AAEL011918-RA	isoform a	2.95359	up	0.000642311	0.000120767		3.44038	up	0.000392776	0.000130413	0.858505	-	no IPS match	conserved hypothetical protein [Source:VB External Description;Acc:AAEL007072]
AAEL000842-RA	microsomal dipeptidase	2.95237	up	0.000340681	3.58546e-05		3.63786	up	9.66278e-05	1.86465e-05	0.811567	F:ligase activity; P:metabolic process	IPR000873; IPR020845; G3DSA:2.30.38.10 (GENE3D), G3DSA:3.30.300.30 (GENE3D), G3DSA:3.40.50.980 (GENE3D), PTHR24095 (PANTHER), PTHR24095:SF44 (PANTHER), SSF56801 (SUPERFAMILY)	AMP dependent coa ligase [Source:VB External Description;Acc:AAEL014663]
AAEL014709-RA	methionine-trna synthetase	2.94974	up	0.0037254	0.00158884		2.36445	up	2.93944e-05	2.70362e-06	1.24754	F:carbohydrate binding; P:hexose metabolic process; F:isomerase activity	IPR008183; IPR011013; IPR014718; IPR015443; IPR018052	aldose-1-epimerase [Source:VB External Description;Acc:AAEL010590]
AAEL001756-RA	anaphase-promoting complex subunit 2	2.93777	up	0.000641227	0.000119934		2.57769	up	8.56587e-05	1.56274e-05	1.13969	-	no IPS match	conserved hypothetical protein [Source:VB External Description;Acc:AAEL014441]
AAEL004805-RA	sodium potassium calcium exchanger 5	2.93494	up	0.00140746	0.000416499		2.89511	up	0.00132613	0.000596718	1.01376	F:zinc ion binding; F:hydroxyacylglutathione hydrolase activity	no IPS match	hydroxyacylglutathione hydrolase [Source:VB External Description;Acc:AAEL009462]
AAEL004125-RA	signal transduction protein lnk-realted	2.93376	up	0.0090268	0.00479321		3.04432	up	0.00127592	0.000570338	0.963683	P:post-embryonic organ development; P:compound eye development; P:cell fate determination; P:eye morphogenesis; F:transcription regulator activity; P:post-embryonic development; P:defense response to bacterium; P:proteolysis; P:neurogenesis; F:DNA binding; F:serine-type endopeptidase activity; P:positive regulation of cellular process; P:crystal cell differentiation; P:cell surface receptor linke…	IPR001254; IPR009003; G3DSA:2.40.10.10 (GENE3D), PTHR24268 (PANTHER), PTHR24268:SF15 (PANTHER), seg (SEG), SignalP-NN(euk) (SIGNALP), tmhmm (TMHMM)	clip-domain serine protease, putative [Source:VB External Description;Acc:AAEL009726]
AAEL009208-RA	zinc finger protein 671	2.93047	up	0.00414474	0.00181288		3.15888	up	0.00228299	0.001135	0.927694	F:binding; C:mitochondrial inner membrane; P:transmembrane transport; C:integral to membrane; F:transporter activity	IPR018108; IPR023395; PTHR24089 (PANTHER), PTHR24089:SF24 (PANTHER)	mitochondrial carrier protein [Source:VB External Description;Acc:AAEL008211]
AAEL012563-RA	serine collagenase 1	2.92878	up	0.00226351	0.000811195		2.0753	up	0.00315345	0.00166258	1.41126	P:oxidation reduction; F:oxidoreductase activity; F:calcium ion binding; P:cell adhesion; F:trimethyllysine dioxygenase activity; P:carnitine biosynthetic process; F:iron ion binding; F:L-ascorbic acid binding; C:extracellular region	no IPS match	hypothetical protein [Source:VB External Description;Acc:AAEL014392]
AAEL014234-RA	---NA---	2.92207	up	0.00589571	0.00283301		3.18985	up	0.00122099	0.000539304	0.916053	P:coenzyme A metabolic process; C:integral to membrane; P:oxidation reduction; F:hydroxymethylglutaryl-CoA reductase (NADPH) activity; P:embryonic heart tube development; P:pole cell migration; F:NADP or NADPH binding; P:gonad development; C:endoplasmic reticulum membrane; P:germ cell attraction; P:isoprenoid biosynthetic process	IPR000731; IPR002202; IPR004554; IPR004816; IPR009023; IPR009029; IPR023074; IPR023076; IPR023282; PF12349 (PFAM), PS51257 (PROFILE)	3-hydroxy-3-methylglutaryl-coenzyme A reductase [Source:VB External Description;Acc:AAEL009311]
AAEL000575-RA	5 nucleotidase	2.92201	up	0.000345696	3.71535e-05		2.81398	up	0.00011091	2.31628e-05	1.03839	C:cytoplasm	PTHR14964 (PANTHER), SSF140361 (SUPERFAMILY)	conserved hypothetical protein [Source:VB External Description;Acc:AAEL006848]
AAEL007224-RA	leucine rich protein	2.92009	up	0.000324449	3.24369e-05		3.18147	up	0.00138381	0.000626429	0.917843	P:axonogenesis; C:plasma membrane	IPR000782; PTHR10900 (PANTHER), PTHR10900:SF9 (PANTHER), seg (SEG)	midline fasciclin [Source:VB External Description;Acc:AAEL008657]
AAEL006962-RA	hypothetical protein AaeL_AAEL006962 [Aedes aegypti]	2.92003	up	0.000987554	0.000241849		3.59078	up	0.000337743	0.000106721	0.8132	F:serine-type endopeptidase activity; P:proteolysis	IPR001254; IPR001314; IPR009003; IPR018114; G3DSA:2.40.10.10 (GENE3D), PTHR24268 (PANTHER), PTHR24268:SF230 (PANTHER)	Clip-domain serine protease, family B. [Source:VB External Description;Acc:AAEL014140]
AAEL005733-RA	myosin heavy nonmuscle or smooth muscle	2.91757	up	0.000344096	3.65513e-05		2.3929	up	6.44441e-05	1.00824e-05	1.21926	P:polyamine biosynthetic process; F:lyase activity	IPR000183; IPR002433; IPR009006; IPR022643; IPR022644; G3DSA:3.20.20.10 (GENE3D), PTHR11482 (PANTHER), PTHR11482:SF4 (PANTHER), SSF51419 (SUPERFAMILY)	ornithine decarboxylase [Source:VB External Description;Acc:AAEL007880]
AAEL012399-RA	d-beta-hydroxybutyrate mitochondrial	2.91644	up	0.00043665	5.91687e-05		2.27361	up	0.00376093	0.00204558	1.28274	F:protein binding	IPR001611; G3DSA:3.80.10.10 (GENE3D), PTHR24365 (PANTHER), SSF52058 (SUPERFAMILY)	conserved hypothetical protein [Source:VB External Description;Acc:AAEL012726]
AAEL013591-RA	dynactin subunit 6	2.89729	up	0.000546084	9.05903e-05		2.08659	up	0.000194166	5.04271e-05	1.38853	-	no IPS match	conserved hypothetical protein [Source:VB External Description;Acc:AAEL000913]
AAEL010264-RA	hypothetical protein AaeL_AAEL010264 [Aedes aegypti]	2.89648	up	0.000259965	1.98999e-05		2.78633	up	7.65432e-06	1.52684e-07	1.03953	F:heme binding; C:membrane; P:oxidation reduction; F:monooxygenase activity; C:microsome; F:electron carrier activity	IPR001128; IPR002401; IPR017972; PTHR24305 (PANTHER), PTHR24305:SF164 (PANTHER), seg (SEG), SignalP-NN(euk) (SIGNALP), tmhmm (TMHMM)	cytochrome P450 [Source:VB External Description;Acc:AAEL007816]
AAEL008664-RB	abhydrolase domain-containing protein 4	2.89248	up	0.000383829	4.60858e-05		2.46668	up	6.33563e-05	9.75759e-06	1.17262	-	SignalP-NN(euk) (SIGNALP)	hypothetical protein [Source:VB External Description;Acc:AAEL008731]
AAEL008664-RA	abhydrolase domain-containing protein 4	2.8919	up	0.000134638	2.60796e-06		2.44188	up	9.32937e-05	1.77394e-05	1.18429	F:cytochrome-c oxidase activity; F:zinc ion binding; C:mitochondrial respiratory chain complex IV; P:regulation of transcription, DNA-dependent; F:DNA binding; P:mitochondrial electron transport, cytochrome c to oxygen; C:nucleus	no IPS match	cytochrome c oxidase, subunit VIIC, putative [Source:VB External Description;Acc:AAEL002737]
AAEL003933-RA	oxidase peroxidase	2.89078	up	0.00100465	0.000248762		2.53175	up	0.00181159	0.000868142	1.14181	-	PTHR12336 (PANTHER)	cuticle protein, putative [Source:VB External Description;Acc:AAEL002229]
AAEL013812-RA	mucin related 89f	2.88649	up	0.00134801	0.000390266		2.79555	up	1.15159e-05	4.40848e-07	1.03253	C:extracellular region; F:chitin binding; P:chitin metabolic process	IPR002557; PTHR23301 (PANTHER), PS51257 (PROFILE)	conserved hypothetical protein [Source:VB External Description;Acc:AAEL002627]
AAEL007407-RB	hypothetical protein AaeL_AAEL007407 [Aedes aegypti]	2.88639	up	0.000480814	7.19669e-05		2.67666	up	0.005207	0.00299723	1.07835	C:cytoplasm; F:iron-sulfur cluster binding; P:UMP biosynthetic process; F:electron carrier activity; F:dihydroorotate oxidase activity; P:oxidation reduction; F:dihydropyrimidine dehydrogenase (NADP+) activity; P:'de novo' pyrimidine base biosynthetic process	IPR005720; IPR009051; IPR012135; IPR012285; IPR013785; IPR017896; IPR017900; PR00419 (PRINTS), G3DSA:3.30.70.20 (GENE3D), G3DSA:3.50.50.60 (GENE3D), PTHR11938 (PANTHER), PTHR11938:SF6 (PANTHER), PF12838 (PFAM), SSF51395 (SUPERFAMILY), SSF51971 (SUPERFAMILY), SSF54862 (SUPERFAMILY)	dihydropyrimidine dehydrogenase [Source:VB External Description;Acc:AAEL014199]
AAEL002716-RA	vitamin d	2.88533	up	0.000121411	1.41182e-06		2.66979	up	6.35926e-05	9.81809e-06	1.08073	C:cytoplasm; F:iron-sulfur cluster binding; P:UMP biosynthetic process; F:electron carrier activity; F:dihydroorotate oxidase activity; P:oxidation reduction; F:dihydropyrimidine dehydrogenase (NADP+) activity; P:'de novo' pyrimidine base biosynthetic process	IPR005720; IPR009051; IPR012135; IPR012285; IPR013785; IPR017896; IPR017900; PR00419 (PRINTS), G3DSA:3.30.70.20 (GENE3D), G3DSA:3.50.50.60 (GENE3D), PTHR11938 (PANTHER), PTHR11938:SF6 (PANTHER), PF12838 (PFAM), SSF51395 (SUPERFAMILY), SSF51971 (SUPERFAMILY), SSF54862 (SUPERFAMILY)	dihydropyrimidine dehydrogenase [Source:VB External Description;Acc:AAEL010204]
AAEL008646-RA	fibrinogen	2.88522	up	0.00250433	0.000938181		2.62899	up	0.00149768	0.000689519	1.09746	P:proteolysis; F:serine-type endopeptidase activity	IPR001254; IPR001314; IPR009003; IPR018114; G3DSA:2.40.10.10 (GENE3D), PTHR24260 (PANTHER), PTHR24260:SF174 (PANTHER)	trypsin, putative [Source:VB External Description;Acc:AAEL005823]
AAEL004529-RA	glyoxylate hydroxypyruvate reductase	2.88328	up	0.00168459	0.000537244		3.27626	up	0.000393934	0.000130897	0.880054	F:protein tyrosine phosphatase activity; P:protein amino acid dephosphorylation; F:zinc ion binding	IPR000242; IPR000306; IPR010569; IPR011011; IPR013083; IPR016130; IPR017455; IPR017906; G3DSA:3.90.190.10 (GENE3D), PTHR10807 (PANTHER), PTHR10807:SF5 (PANTHER), SSF50729 (SUPERFAMILY), SSF52799 (SUPERFAMILY)	myotubularin [Source:VB External Description;Acc:AAEL000564]
AAEL005013-RA	anopheles gambiae pest agap012637-pa	2.88162	up	0.000297999	2.58857e-05		2.70242	up	4.87807e-06	6.39002e-08	1.06631	-	IPR004119; IPR011009; IPR015897; G3DSA:3.90.1200.10 (GENE3D), PTHR11012 (PANTHER)	conserved hypothetical protein [Source:VB External Description;Acc:AAEL014436]
AAEL014657-RA	uncharacterized protein c19orf12 homolog	2.87909	up	0.000348777	3.79458e-05		2.95758	up	0.000450766	0.00015652	0.973464	F:inward rectifier potassium channel activity; P:potassium ion transport; C:integral to membrane	IPR001838; IPR013518; IPR013521; IPR014756; IPR016449; G3DSA:1.10.287.70 (GENE3D), PTHR11767:SF23 (PANTHER), SSF81324 (SUPERFAMILY)	inwardly rectifying k+ channel, [Source:VB External Description;Acc:AAEL013373]
AAEL001032-RA	isoform a	2.878	up	0.000493893	7.47338e-05		2.26226	up	0.000556649	0.000202968	1.27218	-	no IPS match	hypothetical protein [Source:VB External Description;Acc:AAEL008775]
AAEL012137-RA	uncharacterized protein kiaa0226	2.87691	up	0.000383571	4.57808e-05		2.96023	up	0.000108636	2.229e-05	0.971853	P:glycolysis; F:2,3-bisphosphoglycerate-dependent phosphoglycerate mutase activity	IPR005952; IPR013078; G3DSA:3.40.50.1240 (GENE3D), SSF53254 (SUPERFAMILY)	phosphoglycerate mutase [Source:VB External Description;Acc:AAEL007495]
AAEL004952-RA	protein n-terminal asparagine	2.8766	up	0.00381271	0.00163578		3.13272	up	0.000173594	4.3426e-05	0.918246	-	no IPS match	hypothetical protein [Source:VB External Description;Acc:AAEL012853]
AAEL007151-RA	isoform a	2.87325	up	0.0020185	0.000692511		3.22272	up	0.000182418	4.65091e-05	0.891561	P:photoreceptor cell maintenance; C:early endosome; P:sensory perception of sound; P:equilibrioception	IPR002110; IPR010993; IPR013761; IPR020683; PR01415 (PRINTS), PTHR24161 (PANTHER), PTHR24161:SF90 (PANTHER), PF12796 (PFAM)	conserved hypothetical protein [Source:VB External Description;Acc:AAEL004786]
AAEL013777-RA	hypothetical protein AaeL_AAEL013777 [Aedes aegypti]	2.86676	up	0.000396927	4.91174e-05		2.15983	up	0.000246384	6.94795e-05	1.32731	-	PTHR12336 (PANTHER)	conserved hypothetical protein [Source:VB External Description;Acc:AAEL002233]
AAEL010222-RB	gata transcription factor	2.86322	up	0.00300535	0.00120572		3.13257	up	0.000289066	8.72493e-05	0.914014	F:heme binding; P:oxidation reduction; F:monooxygenase activity; F:electron carrier activity; C:mitochondrion	IPR001128; IPR002401; PTHR24305 (PANTHER), PTHR24305:SF95 (PANTHER), seg (SEG)	cytochrome P450 [Source:VB External Description;Acc:AAEL014594]
AAEL012613-RA	serine threonine protein kinase	2.85843	up	0.00226351	0.000811447		2.71116	up	6.48863e-05	1.02453e-05	1.05432	P:transmembrane transport	IPR011701; IPR016196; IPR020846; G3DSA:1.20.1250.20 (GENE3D), PTHR11662 (PANTHER), PTHR11662:SF30 (PANTHER)	Sialin, Sodium/sialic acid cotransporter, putative [Source:VB External Description;Acc:AAEL004247]
AAEL002565-RA		2.85765	up	0.000398486	4.99466e-05		2.53677	up	7.87317e-05	1.35704e-05	1.12649	F:metallopeptidase activity; P:proteolysis; F:zinc ion binding	IPR001930; IPR014782; IPR015569; SSF55486 (SUPERFAMILY), SSF63737 (SUPERFAMILY)	hypothetical protein [Source:VB External Description;Acc:AAEL006323]
AAEL012681-RA	ribosome biogenesis protein rlp24	2.8571	up	0.000170386	6.00576e-06		2.62965	up	0.000271781	7.98947e-05	1.08649	F:serine-type endopeptidase inhibitor activity; F:peptidase activity	IPR000215; IPR023795; IPR023796; G3DSA:2.30.39.10 (GENE3D), G3DSA:3.30.497.10 (GENE3D), PTHR11461:SF26 (PANTHER)	serine protease inhibitor (serpin), likely cleavage at S/S. [Source:VB External Description;Acc:AAEL008364]
AAEL004330-RA	tetratricopeptide repeat protein 39b-like	2.85518	up	0.000730462	0.000150441		3.24008	up	0.000262311	7.60774e-05	0.881207	F:zinc ion binding; C:nucleus; P:proteolysis; F:serine-type endopeptidase activity; F:catalytic activity	no IPS match	hypothetical protein [Source:VB External Description;Acc:AAEL006285]
AAEL002370-RB	myotubularin-related protein 14	2.85497	up	0.000186691	8.23434e-06		3.23837	up	0.000165969	4.07427e-05	0.881607	P:transmembrane transport	IPR016196; PTHR12778 (PANTHER), PTHR12778:SF3 (PANTHER), PF13000 (PFAM)	conserved hypothetical protein [Source:VB External Description;Acc:AAEL002349]
AAEL008963-RA	tyrosine aminotransferase	2.85421	up	0.000134085	2.44776e-06		3.11854	up	1.30691e-05	5.614e-07	0.915241	F:molecular_function; P:biological_process	no IPS match	UPF0493 protein AAEL009648 [Source:VB External Description;Acc:AAEL009648]
AAEL002536-RA	e3 ubiquitin-protein ligase nedd-4	2.85345	up	0.00162764	0.000513099		3.25358	up	6.80911e-05	1.09686e-05	0.877016	C:intracellular; F:zinc ion binding	IPR007087; IPR013087; IPR015880; PTHR11389 (PANTHER), SSF57667 (SUPERFAMILY)	transcription factor IIIA, putative [Source:VB External Description;Acc:AAEL015045]
AAEL007495-RB	phosphoglycerate mutase	2.84732	up	0.0022249	0.000794061		3.27694	up	0.000402371	0.000134717	0.868895	F:protein tyrosine phosphatase activity; P:protein amino acid dephosphorylation; F:zinc ion binding	IPR000242; IPR000306; IPR010569; IPR011011; IPR013083; IPR016130; IPR017455; IPR017906; G3DSA:3.90.190.10 (GENE3D), PTHR10807 (PANTHER), PTHR10807:SF5 (PANTHER), SSF50729 (SUPERFAMILY), SSF52799 (SUPERFAMILY)	myotubularin [Source:VB External Description;Acc:AAEL000564]
AAEL001639-RA	reduction in cnn dots isoform a	2.84608	up	0.000857021	0.000194122		2.81624	up	8.9586e-05	1.66495e-05	1.0106		IPR003598; IPR003599; IPR007110; IPR010939; IPR013098; IPR013783; PTHR10489 (PANTHER), SSF48726 (SUPERFAMILY)	titin [Source:VB External Description;Acc:AAEL005324]
AAEL014650-RA	mannose-binding protein-associated serine protease	2.8455	up	0.00133549	0.000384513		2.25913	up	0.00288819	0.00150485	1.25955	F:metalloendopeptidase activity; P:proteolysis; F:calcium ion binding; C:extracellular matrix; F:zinc ion binding	IPR000585; IPR001818; IPR002477; IPR006026; IPR018487; IPR021190; IPR024079; PTHR10201 (PANTHER), PTHR10201:SF75 (PANTHER), SSF55486 (SUPERFAMILY)	matrix metalloproteinase [Source:VB External Description;Acc:AAEL002982]
AAEL006181-RA	isoform b	2.84386	up	0.000310034	2.84614e-05		3.36466	up	4.45541e-06	5.01941e-08	0.845216	F:metal ion binding; C:transcription factor complex; P:tetrahydrobiopterin biosynthetic process; F:6-pyruvoyltetrahydropterin synthase activity; P:periodic partitioning by pair rule gene; F:sequence-specific DNA binding; F:transcription activator activity; F:transcription factor activity; P:positive regulation of transcription, DNA-dependent	IPR007115; IPR007116; IPR022470; G3DSA:3.30.479.10 (GENE3D), SSF55620 (SUPERFAMILY)	6-pyruvoyltetrahydropterin synthase, putative [Source:VB External Description;Acc:AAEL001642]
AAEL007951-RA	glutathione-s-transferase gst	2.83675	up	0.00101054	0.000250964		3.48114	up	5.48524e-05	7.66478e-06	0.814891	F:asparaginase activity; P:cellular amino acid metabolic process	IPR002110; IPR006033; IPR006034; IPR020683; IPR020827; G3DSA:3.40.50.1170 (GENE3D), G3DSA:3.40.50.40 (GENE3D), PTHR11707:SF3 (PANTHER), PF12796 (PFAM)	l-asparaginase i [Source:VB External Description;Acc:AAEL002796]
AAEL001641-RA	deoxyribonuclease i	2.83472	up	0.00173377	0.000558947		2.7698	up	2.37242e-05	1.88535e-06	1.02344	C:extracellular region; P:glutathione metabolic process; F:glutathione transferase activity	IPR004045; IPR004046; IPR010987; IPR012336; IPR017933; PTHR11260 (PANTHER), PTHR11260:SF37 (PANTHER)	glutathionetransferase [Source:VB External Description;Acc:AAEL001078]
AAEL001113-RA	inorganic phosphate cotransporter	2.83094	up	0.000455141	6.49086e-05		2.64238	up	7.4161e-05	1.23827e-05	1.07136	F:substrate-specific transmembrane transporter activity; C:integral to membrane; P:transmembrane transport; P:carbohydrate transport	IPR003663; IPR005828; IPR016196; IPR020846; G3DSA:1.20.1250.20 (GENE3D), PTHR24063 (PANTHER), PTHR24063:SF77 (PANTHER)	sugar transporter [Source:VB External Description;Acc:AAEL003810]
AAEL014909-RA	hypothetical protein AaeL_AAEL014909 [Aedes aegypti]	2.82892	up	0.000123467	1.67911e-06		2.24571	up	1.41092e-05	6.49653e-07	1.2597	F:heme binding; P:oxidation reduction; F:monooxygenase activity; F:electron carrier activity	IPR001128; IPR002401; IPR017972; PTHR24292 (PANTHER), PTHR24292:SF175 (PANTHER), seg (SEG), SignalP-NN(euk) (SIGNALP), tmhmm (TMHMM)	cytochrome P450 [Source:VB External Description;Acc:AAEL006805]
AAEL003643-RA	amp dependent ligase	2.82471	up	0.00171525	0.000549755		2.4776	up	4.87912e-05	6.41487e-06	1.1401	-	no IPS match	conserved hypothetical protein [Source:VB External Description;Acc:AAEL007648]
AAEL001935-RA	ctl transporter	2.82282	up	0.000258792	1.91695e-05		2.57937	up	0.000408613	0.000137168	1.09438	F:serine-type endopeptidase activity; P:proteolysis	IPR001254; IPR001314; IPR006604; IPR009003; IPR018114; IPR022700; G3DSA:2.40.10.10 (GENE3D), PTHR24268 (PANTHER), PTHR24268:SF126 (PANTHER)	Clip-domain serine protease, family D. [Source:VB External Description;Acc:AAEL002124]
AAEL006011-RA	kazal domain-containing peptide	2.82187	up	0.000161584	5.06957e-06		3.02298	up	0.000717769	0.000279309	0.933473	F:metalloendopeptidase activity; P:protein processing; C:mitochondrion; P:proteolysis	IPR001567; IPR024077; IPR024079; PTHR11804 (PANTHER), PTHR11804:SF5 (PANTHER), SSF55486 (SUPERFAMILY)	mitochondrial intermediate peptidase [Source:VB External Description;Acc:AAEL003461]
AAEL014318-RA	msr- isoform b	2.82104	up	0.000258477	1.8716e-05		2.74349	up	7.65432e-06	1.7334e-07	1.02827	P:cholesterol metabolic process; C:lipid particle; P:lipid catabolic process; F:lipase activity	no IPS match	triacylglycerol lipase [Source:VB External Description;Acc:AAEL005706]
AAEL001924-RB	zinc finger protein	2.80984	up	0.000636914	0.000118612		3.02483	up	0.000178504	4.49699e-05	0.928925	-	no IPS match	conserved hypothetical protein [Source:VB External Description;Acc:AAEL014559]
AAEL000699-RA	nuclear fragile x mental retardation-interacting	2.80928	up	0.00136437	0.000396815		2.28616	up	0.000216337	5.79189e-05	1.22882	F:hydrolase activity, acting on ester bonds; F:metal ion binding; P:nucleotide catabolic process; F:nucleotide binding	IPR004843; IPR006146; IPR006179; IPR008334; G3DSA:3.60.21.10 (GENE3D), PTHR11575:SF7 (PANTHER), SSF56300 (SUPERFAMILY)	apyrase, putative [Source:VB External Description;Acc:AAEL011341]
AAEL010565-RC	forkhead box protein	2.80651	up	0.000398486	4.98578e-05		2.53517	up	0.0025428	0.00129341	1.10703	F:heme binding; P:oxidation reduction; F:monooxygenase activity; F:electron carrier activity	IPR001128; IPR002401; IPR017972; PTHR24292 (PANTHER)	cytochrome P450 [Source:VB External Description;Acc:AAEL005006]
AAEL010750-RB	isoform u	2.80505	up	0.000298031	2.59983e-05		2.54192	up	2.79426e-05	2.49595e-06	1.10352	F:receptor binding; P:response to fungus; P:immune response; P:cell development; P:regulation of biological process; P:dorsal/ventral axis specification; P:defense response	SSF57501 (SUPERFAMILY)	SpÃ¤tzle 1A (Spz1A) [Source:VB External Description;Acc:AAEL013434]
AAEL013373-RA	inwardly rectifying k+	2.80202	up	0.000182126	7.25202e-06		2.58419	up	2.37242e-05	1.86724e-06	1.08429	-	no IPS match	hypothetical protein [Source:VB External Description;Acc:AAEL004972]
AAEL006883-RA	growth arrest and dna-damage-inducible protein gadd45 alpha	2.80107	up	0.000416515	5.40419e-05		3.81766	up	0.000103415	2.07875e-05	0.733714	-	no IPS match	conserved hypothetical protein [Source:VB External Description;Acc:AAEL001082]
AAEL015315-RA	malate synthase	2.79817	up	0.000220057	1.20516e-05		3.09408	up	0.000241258	6.71259e-05	0.904362	F:protein binding	IPR001810; IPR022364; G3DSA:3.80.10.10 (GENE3D), PTHR23125 (PANTHER), PF12937 (PFAM), SSF52047 (SUPERFAMILY)	F-box/lrr protein fragment [Source:VB External Description;Acc:AAEL010314]
AAEL001747-RA	fatty acyl- reductase 1	2.79515	up	0.0015958	0.000498948		3.31705	up	0.000161933	3.93427e-05	0.842663	-	IPR002937; G3DSA:3.50.50.60 (GENE3D), PTHR10742 (PANTHER), PTHR10742:SF22 (PANTHER), seg (SEG), SignalP-NN(euk) (SIGNALP), tmhmm (TMHMM), SSF51905 (SUPERFAMILY), SSF54373 (SUPERFAMILY)	amine oxidase [Source:VB External Description;Acc:AAEL009045]
AAEL007495-RC	phosphoglycerate mutase	2.79305	up	0.00300725	0.00120813		3.21696	up	0.000299777	9.1519e-05	0.868226	F:acyl-CoA binding	seg (SEG), tmhmm (TMHMM)	conserved hypothetical protein [Source:VB External Description;Acc:AAEL006189]
AAEL014321-RA	glucosylceramidase	2.79289	up	0.000525456	8.40774e-05		2.92198	up	5.43281e-05	7.55742e-06	0.95582	P:transport; C:intracellular; F:transporter activity	IPR011074; G3DSA:1.10.8.20 (GENE3D), PTHR10174 (PANTHER), PTHR10174:SF38 (PANTHER)	conserved hypothetical protein [Source:VB External Description;Acc:AAEL008121]
AAEL003970-RA	amino acid transporter	2.78597	up	0.000656375	0.000125292		3.27382	up	7.65432e-06	1.64333e-07	0.850985	-	PS51257 (PROFILE)	conserved hypothetical protein [Source:VB External Description;Acc:AAEL000294]
AAEL012733-RA	ribosomal protein l19	2.78385	up	0.00262975	0.00099719		2.76019	up	0.000432864	0.000147879	1.00857	-	no IPS match	hypothetical protein [Source:VB External Description;Acc:AAEL001498]
AAEL013699-RA	cytoplasmic linker protein isoform i	2.78347	up	0.00125827	0.000349948		2.76688	up	0.00027868	8.29526e-05	1.006	P:cell adhesion; C:membrane	IPR002159; PTHR11923:SF10 (PANTHER)	ClassB Scavenger Receptor (CD36 domain). [Source:VB External Description;Acc:AAEL009420]
AAEL005464-RA	isoform d	2.78243	up	0.000925624	0.000219669		2.89003	up	0.000368675	0.000120361	0.962767	C:intracellular; F:zinc ion binding	IPR007087; IPR013087; IPR015880; PTHR11389 (PANTHER), SSF57667 (SUPERFAMILY)	transcription factor IIIA, putative [Source:VB External Description;Acc:AAEL014150]
AAEL002261-RA	gtp cyclohydrolase i	2.7758	up	0.000222396	1.24393e-05		3.74501	up	0.000657377	0.000250908	0.741198	C:integral to membrane; P:fibroblast growth factor receptor signaling pathway	IPR003599; IPR007110; IPR013098; IPR013106; IPR013783; PTHR19890 (PANTHER), SSF48726 (SUPERFAMILY)	conserved hypothetical protein [Source:VB External Description;Acc:AAEL013083]
AAEL000515-RA	juvenile hormone-inducible	2.77569	up	0.000576627	0.00010032		2.31768	up	0.000127455	2.83317e-05	1.19762	F:transferase activity, transferring acyl groups other than amino-acyl groups	no IPS match	conserved hypothetical protein [Source:VB External Description;Acc:AAEL008955]
AAEL010750-RA	isoform u	2.77267	up	0.000258792	1.89005e-05		2.59398	up	3.26276e-05	3.26319e-06	1.06888	P:proteolysis; F:serine-type endopeptidase activity	IPR009755; IPR011042; PTHR12897 (PANTHER), SSF50960 (SUPERFAMILY)	conserved hypothetical protein [Source:VB External Description;Acc:AAEL008491]
AAEL001879-RA	transcription factor adf-1	2.77066	up	0.00011415	1.17478e-06		2.75529	up	0.000284369	8.51849e-05	1.00558	-	no IPS match	hypothetical protein [Source:VB External Description;Acc:AAEL007012]
AAEL010879-RA	hypothetical conserved protein	2.76981	up	0.00121532	0.000331338		2.5418	up	0.000275196	8.13941e-05	1.0897	P:glutamine metabolic process; F:omega peptidase activity	IPR011697; IPR015527; G3DSA:3.40.50.880 (GENE3D), SSF52317 (SUPERFAMILY)	gamma-glutamyl hydrolase, putative [Source:VB External Description;Acc:AAEL000271]
AAEL003105-RA	isoform c	2.76876	up	0.000170386	6.03302e-06		2.83828	up	2.45859e-05	2.00974e-06	0.975506	F:nucleic acid binding; C:intracellular; F:zinc ion binding	IPR007087; IPR013087; IPR015880; PTHR24375 (PANTHER), PTHR24375:SF381 (PANTHER), PF12874 (PFAM), SSF57667 (SUPERFAMILY)	zinc finger protein [Source:VB External Description;Acc:AAEL001924]
AAEL000910-RA	isoform b	2.76518	up	0.00234502	0.000853904		2.48447	up	0.000139891	3.25558e-05	1.11299	P:regulation of growth; P:auxin biosynthetic process; F:protein serine/threonine kinase activity; P:regulation of translation; C:microtubule; C:centrosome; F:ATP binding; P:microtubule-based process; C:nuclear envelope; P:response to stress; P:protein amino acid phosphorylation	IPR000719; IPR002290; IPR008271; IPR011009; IPR017441; IPR017442; G3DSA:1.10.510.10 (GENE3D), G3DSA:3.30.200.20 (GENE3D), PTHR24349 (PANTHER), PTHR24349:SF21 (PANTHER)	map kinase-interacting serine/threonine kinase [Source:VB External Description;Acc:AAEL004704]
AAEL008928-RB	inwardly rectifying k+	2.76064	up	0.00087971	0.000202413		3.09689	up	2.23992e-05	1.62723e-06	0.891426	C:chromatin; P:poly(A)+ mRNA export from nucleus; P:negative regulation of chromatin silencing; C:nuclear periphery; C:SAGA complex; C:nuclear pore; P:histone deubiquitination; F:chromatin insulator sequence binding; F:transcription factor activity; P:positive regulation of transcription from RNA polymerase II promoter; F:C2H2 zinc finger domain binding; F:ligand-dependent nuclear receptor transc…	IPR018783; PTHR12514 (PANTHER), PTHR12514:SF2 (PANTHER)	Enhancer of yellow 2 transcription factor [Source:VB External Description;Acc:AAEL000903]
AAEL008857-RA	deoxyribonuclease i	2.76044	up	0.000257138	1.82731e-05		2.52845	up	0.000321683	0.000100305	1.09175	C:nucleus; F:zinc ion binding	seg (SEG)	hypothetical protein [Source:VB External Description;Acc:AAEL013086]
AAEL017217-RA	cytochrome p450 CYP9J21	2.75665	up	0.000455431	6.5182e-05		3.11439	up	8.75255e-05	1.60954e-05	0.885133	F:protein binding; C:Z disc	no IPS match	conserved hypothetical protein [Source:VB External Description;Acc:AAEL003122]
AAEL008395-RA	hypothetical protein AaeL_AAEL008395 [Aedes aegypti]	2.75513	up	0.000506544	7.86937e-05		3.01031	up	3.06769e-05	2.89727e-06	0.915229	-	IPR007871; IPR021721; IPR022776; PTHR12998 (PANTHER)	conserved hypothetical protein [Source:VB External Description;Acc:AAEL011199]
AAEL009726-RA	clip-domain serine protease	2.75364	up	0.000123467	1.66466e-06		2.57036	up	2.60472e-05	2.195e-06	1.07131	F:chitin binding; P:chitin metabolic process; C:extracellular region	seg (SEG), SignalP-NN(euk) (SIGNALP), tmhmm (TMHMM)	conserved hypothetical protein [Source:VB External Description;Acc:AAEL011766]
AAEL004942-RB	isoform d	2.75338	up	0.00496058	0.00228884		2.44777	up	7.61653e-05	1.29064e-05	1.12485	F:RNA binding; P:RNA processing	IPR000061; PTHR13161 (PANTHER), PTHR13161:SF9 (PANTHER), SSF109905 (SUPERFAMILY)	scaffold attachment factor B, putative [Source:VB External Description;Acc:AAEL008703]
AAEL014150-RA	transcription factor	2.75216	up	0.000428848	5.72182e-05		2.53159	up	6.72389e-05	1.07803e-05	1.08713	F:binding; C:mitochondrial inner membrane; F:transmembrane transporter activity; P:transmembrane transport; C:integral to membrane	IPR002067; IPR018108; IPR023395; PTHR24089 (PANTHER), PTHR24089:SF60 (PANTHER)	mitochondrial carrier protein ymc [Source:VB External Description;Acc:AAEL008494]
AAEL000940-RA	tpa_inf: hdc06238	2.75205	up	0.0001845	7.82125e-06		2.7725	up	1.88519e-05	1.13374e-06	0.992623	-	no IPS match	conserved hypothetical protein [Source:VB External Description;Acc:AAEL010264]
AAEL009385-RA	domon domain-containing protein	2.75114	up	0.00038151	4.48725e-05		3.41774	up	0.00222859	0.00110542	0.804957	C:integral to plasma membrane; F:neurotransmitter:sodium symporter activity; P:neurotransmitter transport	seg (SEG), SignalP-NN(euk) (SIGNALP)	sodium/chloride dependent transporter [Source:VB External Description;Acc:AAEL012596]
AAEL013475-RA	elegans protein partially confirmed by transcript evidence	2.75103	up	0.000629727	0.000116425		2.80142	up	0.000298056	9.07928e-05	0.982015	F:structural constituent of ribosome; P:ribosome biogenesis; C:cytosolic large ribosomal subunit; P:translation	IPR000988; IPR011017; IPR023441; IPR023442; PTHR10792:SF2 (PANTHER), SSF57716 (SUPERFAMILY)	60S ribosomal protein L24 [Source:VB External Description;Acc:AAEL012681]
AAEL011051-RA	membrane-bound o-acyltransferase domain-containing protein 2	2.74966	up	0.000341895	3.61918e-05		2.91088	up	5.47398e-05	7.63521e-06	0.944616	F:acyltransferase activity	IPR007130	diacylglycerol o-acyltransferase [Source:VB External Description;Acc:AAEL008878]
AAEL012750-RA	general transcription factor iih subunit 1	2.7495	up	0.000214152	1.12377e-05		2.63523	up	0.00024545	6.89367e-05	1.04336	C:extracellular space; P:digestion; P:proteolysis; F:metallocarboxypeptidase activity; F:zinc ion binding	IPR000834; IPR003146; IPR009020; coil (COIL), G3DSA:3.40.630.10 (GENE3D), PTHR11705 (PANTHER), PTHR11705:SF6 (PANTHER), SignalP-NN(euk) (SIGNALP), SSF53187 (SUPERFAMILY)	carboxypeptidase [Source:VB External Description;Acc:AAEL010780]
AAEL005199-RA	juvenile hormone esterase	2.7489	up	0.000546276	9.09567e-05		4.66075	up	0.000303853	9.31329e-05	0.589799	F:calcium ion binding; F:motor activity; C:muscle myosin complex	IPR002048; IPR011992; IPR018249; PTHR23048 (PANTHER), SSF47473 (SUPERFAMILY)	myosin light chain 1, [Source:VB External Description;Acc:AAEL012207]
AAEL002370-RA	myotubularin-related protein 14	2.74707	up	0.000444021	6.16364e-05		3.15872	up	0.000236347	6.52456e-05	0.86968	F:calcium ion binding	seg (SEG)	conserved hypothetical protein [Source:VB External Description;Acc:AAEL010116]
AAEL013633-RA	cg2257	2.73808	up	0.000297999	2.59295e-05		2.40458	up	0.00122961	0.000544355	1.13869	F:heme binding; P:oxidation reduction; F:monooxygenase activity; F:electron carrier activity	IPR001128; IPR002401; PTHR24305 (PANTHER), PTHR24305:SF95 (PANTHER), SignalP-NN(euk) (SIGNALP)	cytochrome P450 [Source:VB External Description;Acc:AAEL002005]
AAEL009477-RA	hypothetical protein AaeL_AAEL009477 [Aedes aegypti]	2.73648	up	0.000240526	1.46001e-05		2.67543	up	3.9016e-05	4.45616e-06	1.02282	F:alpha-glucosidase activity; P:carbohydrate metabolic process; F:receptor activity; F:cation binding	seg (SEG)	alpha-amylase [Source:VB External Description;Acc:AAEL010537]
AAEL011550-RA	high choriolytic enzyme 1	2.7319	up	0.000208352	1.03044e-05		3.22416	up	1.80677e-05	1.02494e-06	0.847322	P:transport; C:membrane; F:nucleoside transmembrane transporter activity	no IPS match	equilibrative nucleoside transporter [Source:VB External Description;Acc:AAEL010123]
AAEL001924-RA	zinc finger protein	2.731	up	0.000546258	9.08869e-05		2.92048	up	8.06149e-05	1.4035e-05	0.935119	-	IPR005398	conserved hypothetical protein [Source:VB External Description;Acc:AAEL014887]
AAEL005216-RA	hypothetical protein AaeL_AAEL005216 [Aedes aegypti]	2.72929	up	0.00118669	0.000320007		2.74852	up	8.63575e-05	1.57767e-05	0.993003	F:binding; F:oxidoreductase activity; P:metabolic process; F:catalytic activity	no IPS match	conserved hypothetical protein [Source:VB External Description;Acc:AAEL012399]
AAEL008121-RA	cral trio domain-containing protein	2.72228	up	0.00128723	0.000363364		2.57325	up	0.00157749	0.00073304	1.05792	F:chitinase activity; F:cation binding; P:chitin catabolic process	IPR001223; IPR011583; IPR013781; IPR017853; G3DSA:3.10.50.10 (GENE3D), PTHR11177 (PANTHER), PTHR11177:SF30 (PANTHER), SSF54556 (SUPERFAMILY)	brain chitinase and chia [Source:VB External Description;Acc:AAEL002964]
AAEL014190-RA	elongation of very long chain fatty acids protein aael008004	2.72185	up	0.000760536	0.000161574		3.17695	up	1.08069e-05	3.84208e-07	0.85675	-	IPR016196; PTHR16172 (PANTHER), PTHR16172:SF6 (PANTHER), PF12832 (PFAM), PS51257 (PROFILE)	conserved hypothetical protein [Source:VB External Description;Acc:AAEL003137]
AAEL001257-RA	sugar transporter	2.71985	up	0.00260949	0.00098603		3.90081	up	0.000109202	2.24555e-05	0.697254	F:carboxypeptidase activity	no IPS match	conserved hypothetical protein [Source:VB External Description;Acc:AAEL009861]
AAEL000315-RA	pigeon protein (linotte protein)	2.71956	up	0.000581262	0.000101909		2.5843	up	0.000178548	4.50077e-05	1.05234	P:protein folding; F:unfolded protein binding; P:response to stress; F:heat shock protein binding	IPR001623; IPR002939; IPR003095; IPR008971; IPR018253; G3DSA:2.60.260.20 (GENE3D), PTHR24077 (PANTHER), PTHR24077:SF88 (PANTHER)	DNA-J/hsp40 [Source:VB External Description;Acc:AAEL006899]
AAEL014484-RA	leptin receptor-like protein	2.71311	up	0.00342436	0.0014294		2.91299	up	0.00125824	0.000560048	0.931383	F:kinase activity; P:proteolysis; F:serine-type endopeptidase activity	IPR000859; IPR001254; IPR001314; IPR009003; IPR018114; G3DSA:2.40.10.10 (GENE3D), PTHR24275 (PANTHER), PTHR24275:SF182 (PANTHER), seg (SEG), SignalP-NN(euk) (SIGNALP)	lumbrokinase-3(1) precursor, putative [Source:VB External Description;Acc:AAEL006703]
AAEL010755-RA	ww domain-containing adapter protein with coiled-coil	2.71195	up	0.00300535	0.0012059		2.51527	up	0.000557554	0.000203579	1.0782	F:serine-type endopeptidase activity; P:proteolysis	IPR001254; IPR001314; IPR009003; G3DSA:2.40.10.10 (GENE3D), PTHR24268 (PANTHER), PTHR24268:SF174 (PANTHER)	serine protease [Source:VB External Description;Acc:AAEL002593]
AAEL005628-RB	rna-binding protein nob1	2.70798	up	0.000355183	3.89106e-05		2.24825	up	3.3393e-05	3.40047e-06	1.20449	F:branched-chain-amino-acid transaminase activity; P:branched chain family amino acid biosynthetic process; C:mitochondrion	IPR001544; IPR005786; IPR018300; G3DSA:3.20.10.10 (GENE3D), G3DSA:3.30.470.10 (GENE3D)	branched-chain amino acid aminotransferase [Source:VB External Description;Acc:AAEL007909]
AAEL005236-RA	hypothetical protein AaeL_AAEL005236 [Aedes aegypti]	2.7075	up	0.00311806	0.00127144		2.91533	up	0.000710509	0.000275855	0.928713	C:membrane; F:growth factor activity; P:positive regulation of cell division	IPR000072; IPR004153; G3DSA:2.10.90.10 (GENE3D), PTHR11633 (PANTHER), PTHR11633:SF8 (PANTHER), SSF57501 (SUPERFAMILY)	conserved hypothetical protein [Source:VB External Description;Acc:AAEL013840]
AAEL002457-RB	tan	2.70715	up	0.000546576	9.14858e-05		2.88958	up	3.06769e-05	2.90999e-06	0.936866	C:intracellular; P:transport; F:transporter activity	seg (SEG)	CRAL/TRIO domain-containing protein [Source:VB External Description;Acc:AAEL005779]
AAEL002457-RA	tan	2.70605	up	0.000624213	0.00011487		2.916	up	2.65235e-05	2.30887e-06	0.927999	F:acyltransferase activity	IPR007130	diacylglycerol o-acyltransferase [Source:VB External Description;Acc:AAEL008878]
AAEL013574-RB	apolipoprotein d	2.70306	up	0.00058419	0.000102924		2.35113	up	5.10769e-05	6.87264e-06	1.14969	C:intracellular; P:proteolysis; F:calcium-dependent cysteine-type endopeptidase activity	IPR011992; IPR018249; IPR022682; IPR022683; IPR022684; G3DSA:2.60.120.380 (GENE3D), PTHR10183 (PANTHER), PTHR10183:SF45 (PANTHER), SSF47473 (SUPERFAMILY)	hypothetical protein [Source:VB External Description;Acc:AAEL003951]
AAEL011133-RA	app1 protein	2.70225	up	0.00076809	0.000164026		3.04711	up	0.000311955	9.63362e-05	0.886825	F:actin binding; P:response to mechanical stimulus	SignalP-NN(euk) (SIGNALP), tmhmm (TMHMM)	filamin, putative [Source:VB External Description;Acc:AAEL014591]
AAEL007068-RA	pancreatic triacylglycerol lipase	2.70105	up	0.000395626	4.84232e-05		2.71118	up	5.63553e-06	8.04567e-08	0.996263	C:cytoplasm; P:methionyl-tRNA aminoacylation; F:ATP binding; F:methionine-tRNA ligase activity	IPR000738; IPR001412; IPR009068; IPR009080; IPR010987; IPR014729; IPR014758; IPR015413; IPR017933; G3DSA:1.10.730.10 (GENE3D), G3DSA:2.20.28.20 (GENE3D), PTHR11946 (PANTHER), PTHR11946:SF20 (PANTHER), SSF52374 (SUPERFAMILY), SSF57770 (SUPERFAMILY)	methionine-tRNA synthetase [Source:VB External Description;Acc:AAEL014709]
AAEL005134-RB	arylsulfatase b	2.70102	up	0.000754961	0.000159742		2.18517	up	2.12024e-05	1.4657e-06	1.23607	-	PTHR21115 (PANTHER)	hypothetical protein [Source:VB External Description;Acc:AAEL013784]
AAEL007796-RA	clipd1 protein	2.69596	up	0.000437549	5.97066e-05		2.96178	up	8.23692e-06	2.34978e-07	0.910252	F:protein binding	IPR001202; PTHR15911 (PANTHER), PTHR15911:SF2 (PANTHER)	hypothetical protein [Source:VB External Description;Acc:AAEL010755]
AAEL014198-RA	cdp-diacylglycerol--glycerol-3-phosphate 3-phosphatidyltransferase	2.69309	up	0.000381608	4.50078e-05		2.63051	up	0.000118559	2.54943e-05	1.02379	P:transmembrane transport	IPR011701; IPR016196; IPR020846; G3DSA:1.20.1250.20 (GENE3D), PTHR24003 (PANTHER), PTHR24003:SF12 (PANTHER), SignalP-NN(euk) (SIGNALP), tmhmm (TMHMM)	conserved hypothetical protein [Source:VB External Description;Acc:AAEL009198]
AAEL006880-RA	rab32	2.6913	up	0.000375716	4.33789e-05		2.50681	up	0.000135526	3.11803e-05	1.0736	C:cytoplasm; F:transcription repressor activity	no IPS match	conserved hypothetical protein [Source:VB External Description;Acc:AAEL001920]
AAEL007913-RA	sulfotransferase	2.69021	up	0.00129647	0.00036713		2.0673	up	0.004193	0.00232085	1.30131	F:transferase activity	IPR004045; IPR004046; IPR010987; IPR012336; IPR017933; PTHR11260 (PANTHER), PTHR11260:SF37 (PANTHER)	glutathionetransferase [Source:VB External Description;Acc:AAEL007946]
AAEL003824-RA	3bp5h_drome ame: full=sh3 domain-binding protein 5 homolog ame: full=protein parcase	2.6846	up	0.000698291	0.000138512		2.7665	up	0.000150135	3.56666e-05	0.970398	P:mitotic spindle elongation; F:structural constituent of ribosome; C:cytosolic large ribosomal subunit; P:translation	seg (SEG), SignalP-NN(euk) (SIGNALP)	60S ribosomal protein L19 [Source:VB External Description;Acc:AAEL012733]
AAEL011933-RA	hypothetical protein AaeL_AAEL011933 [Aedes aegypti]	2.68337	up	0.000843893	0.000189002		4.50262	up	0.00459806	0.00259676	0.595956	F:heme binding; P:oxidation reduction; F:monooxygenase activity; F:electron carrier activity	IPR001128; IPR002403; IPR017972; PTHR24292 (PANTHER), PTHR24292:SF175 (PANTHER)	cytochrome P450 [Source:VB External Description;Acc:AAEL014619]
AAEL008928-RA	inwardly rectifying k+	2.67977	up	0.00115905	0.000308153		3.03735	up	3.03182e-05	2.83072e-06	0.882274	F:FAD binding; F:oxidoreductase activity, acting on CH-OH group of donors; P:alcohol metabolic process	IPR000172; IPR007867; IPR012132; G3DSA:3.30.560.10 (GENE3D), G3DSA:3.50.50.60 (GENE3D), G3DSA:4.10.450.10 (GENE3D), PTHR11552 (PANTHER), PTHR11552:SF10 (PANTHER), SSF51905 (SUPERFAMILY), SSF54373 (SUPERFAMILY)	glucose dehydrogenase [Source:VB External Description;Acc:AAEL009193]
AAEL002599-RA	hypothetical protein AaeL_AAEL002599 [Aedes aegypti]	2.67461	up	0.0001586	4.62469e-06		3.27515	up	1.38584e-05	6.06195e-07	0.816637	C:integral to membrane; C:Golgi apparatus; F:transferase activity, transferring glycosyl groups; F:sugar binding	IPR000772; IPR001173; IPR008997; G3DSA:2.80.10.50 (GENE3D), G3DSA:3.90.550.10 (GENE3D), PTHR11675 (PANTHER), SSF53448 (SUPERFAMILY)	n-acetylgalactosaminyltransferase [Source:VB External Description;Acc:AAEL000639]
AAEL007197-RA	amino acid transporter	2.67414	up	0.00564504	0.00268558		3.36897	up	6.36385e-05	9.84125e-06	0.793754	P:olfactory behavior; P:metabolic process; F:oxidoreductase activity; F:binding; P:mushroom body development; P:inter-male aggressive behavior	IPR002198; IPR016040; PTHR24322 (PANTHER), PTHR24322:SF24 (PANTHER), SSF51735 (SUPERFAMILY)	short-chain dehydrogenase [Source:VB External Description;Acc:AAEL008227]
AAEL010437-RA	n-sulphoglucosamine sulphohydrolase	2.6715	up	0.000254735	1.77584e-05		2.78339	up	1.45033e-05	6.94474e-07	0.959803	F:ubiquitin-protein ligase activity; P:protein ubiquitination; P:regulation of protein metabolic process	IPR000608; IPR016135; IPR023313; PTHR24067 (PANTHER), PTHR24067:SF19 (PANTHER), SM00212 (SMART)	ubiquitin-conjugating enzyme h [Source:VB External Description;Acc:AAEL013633]
AAEL005134-RA	arylsulfatase b	2.66912	up	0.00070746	0.000142237		2.19192	up	8.71732e-05	1.60139e-05	1.21771	F:hydrolase activity, acting on ester bonds; F:metal ion binding; P:nucleotide catabolic process; F:nucleotide binding	IPR006179; IPR008334; PTHR11575:SF7 (PANTHER)	hypothetical protein [Source:VB External Description;Acc:AAEL009968]
AAEL012272-RB	fk506 binding protein	2.66896	up	0.00328275	0.00136024		3.22201	up	0.000314128	9.71637e-05	0.828352	C:cytoplasm; C:plasma membrane; F:calcium ion binding; P:salivary gland cell autophagic cell death; C:nucleus	seg (SEG)	calcium-binding protein E63-1 [Source:VB External Description;Acc:AAEL012513]
AAEL014514-RA	high choriolytic enzyme 1	2.66565	up	0.000179873	6.87581e-06		3.27198	up	6.81428e-06	1.22828e-07	0.81469	F:heme binding; P:oxidation reduction; F:monooxygenase activity; F:electron carrier activity	IPR001128; IPR002401; IPR017972; PTHR24292 (PANTHER), PTHR24292:SF131 (PANTHER)	cytochrome P450 [Source:VB External Description;Acc:AAEL014678]
AAEL001957-RA	os-d-like protein	2.65006	up	0.000749365	0.000157189		2.45071	up	0.000113251	2.38563e-05	1.08134	C:integral to membrane; P:transmembrane transport	IPR004481; IPR004837; PTHR10846 (PANTHER), PTHR10846:SF2 (PANTHER)	potassium-dependent sodium-calcium exchanger, putative [Source:VB External Description;Acc:AAEL004814]
AAEL010565-RB	forkhead box protein	2.64843	up	0.000417584	5.42587e-05		2.49339	up	0.000823487	0.000331892	1.06218	F:acylphosphatase activity	IPR001792; IPR020456; G3DSA:3.30.70.100 (GENE3D), PTHR10029 (PANTHER)	acylphosphatase, putative [Source:VB External Description;Acc:AAEL001490]
AAEL008928-RC	inwardly rectifying k+	2.64413	up	0.000785473	0.000169799		2.97445	up	1.81961e-05	1.03912e-06	0.888945	F:calcium ion binding; F:calcium-dependent phospholipid binding	seg (SEG), SignalP-NN(euk) (SIGNALP)	annexin x [Source:VB External Description;Acc:AAEL005407]
AAEL015092-RA	hypothetical protein AaeL_AAEL015092 [Aedes aegypti]	2.64388	up	0.00958361	0.00517663		2.82979	up	0.00993292	0.00625466	0.934301	F:kinase activity; C:integral to membrane	IPR007237	hypothetical protein [Source:VB External Description;Acc:AAEL012301]
AAEL008878-RB	diacylglycerol o-acyltransferase	2.64255	up	0.00109709	0.000283748		2.58581	up	1.04426e-05	3.615e-07	1.02194	-	no IPS match	hypothetical protein [Source:VB External Description;Acc:AAEL012901]
AAEL010219-RA	sugar transporter	2.62806	up	0.00285851	0.00112537		3.56348	up	0.00130255	0.000583886	0.737497	F:nucleic acid binding; C:nucleus; F:zinc ion binding	seg (SEG), tmhmm (TMHMM)	conserved hypothetical protein [Source:VB External Description;Acc:AAEL010011]
AAEL005628-RA	rna-binding protein nob1	2.6264	up	0.000291686	2.49872e-05		2.09843	up	2.29528e-05	1.72545e-06	1.2516	F:heme binding; P:oxidation reduction; F:monooxygenase activity; F:electron carrier activity	no IPS match	cytochrome P450 [Source:VB External Description;Acc:AAEL014614]
AAEL002384-RA	coiled-coil domain-containing protein 49	2.62632	up	0.000546576	9.16898e-05		2.6992	up	3.81543e-05	4.30899e-06	0.973002	F:catalytic activity; P:metabolic process; F:binding	IPR004262; IPR013120; IPR016040; PTHR11011 (PANTHER), SSF51735 (SUPERFAMILY)	conserved hypothetical protein [Source:VB External Description;Acc:AAEL001747]
AAEL000055-RA	uncharacterized protein c1orf85-like protein	2.61979	up	0.000277262	2.23479e-05		2.42754	up	3.43608e-05	3.57717e-06	1.0792	C:nucleus; F:DNA binding; F:protein binding; F:histone-lysine N-methyltransferase activity	IPR001202; IPR001214; IPR003616; IPR006560; IPR013257; IPR017956; G3DSA:2.170.270.10 (GENE3D), PTHR22884 (PANTHER), PTHR22884:SF36 (PANTHER), SSF82199 (SUPERFAMILY)	huntingtin interacting protein [Source:VB External Description;Acc:AAEL006013]
AAEL012272-RA	fk506 binding protein	2.61966	up	0.00273857	0.00105691		3.09793	up	0.000299777	9.15427e-05	0.845615	C:membrane; P:potassium ion transport	IPR013099; G3DSA:1.10.287.70 (GENE3D), PTHR11003 (PANTHER), SSF81324 (SUPERFAMILY)	conserved hypothetical protein [Source:VB External Description;Acc:AAEL009544]
AAEL005221-RA	internalin a	2.61851	up	0.000218457	1.173e-05		2.55356	up	3.66148e-05	4.05663e-06	1.02543	F:zinc ion binding	IPR000433; IPR009060; IPR015940; G3DSA:1.10.8.10 (GENE3D), PTHR15090 (PANTHER)	hypothetical protein [Source:VB External Description;Acc:AAEL001471]
AAEL002629-RA	serine protease	2.61682	up	0.00137392	0.00040046		2.55998	up	2.61535e-05	2.22458e-06	1.0222	F:transferase activity, transferring acyl groups other than amino-acyl groups	IPR002656; PTHR11161 (PANTHER)	conserved hypothetical protein [Source:VB External Description;Acc:AAEL011516]
AAEL006600-RB	juvenile hormone-inducible	2.61663	up	0.000101054	6.43815e-07		2.35541	up	5.73123e-05	8.3054e-06	1.1109	F:hydrolase activity, acting on carbon-nitrogen (but not peptide) bonds; F:binding	IPR001507; IPR003014; IPR003609; SSF57414 (SUPERFAMILY)	hypothetical protein [Source:VB External Description;Acc:AAEL003278]
AAEL008250-RA	hypothetical conserved protein	2.61029	up	0.000131437	2.38332e-06		2.47673	up	1.14598e-05	4.30015e-07	1.05393	F:galactoside binding; C:cytosol	IPR001079; IPR008985; IPR013320; PTHR11346 (PANTHER), PTHR11346:SF31 (PANTHER)	Galectin. [Source:VB External Description;Acc:AAEL003541]
AAEL006880-RC	rab32	2.60852	up	0.000598683	0.000107238		2.50244	up	0.000151563	3.60765e-05	1.04239	F:heme binding; P:oxidation reduction; F:monooxygenase activity; F:electron carrier activity	seg (SEG)	cytochrome P450 [Source:VB External Description;Acc:AAEL006793]
AAEL007193-RA	amino acid transporter	2.60705	up	0.000183273	7.5823e-06		2.28974	up	8.9027e-05	1.65119e-05	1.13858	-	no IPS match	hypothetical protein [Source:VB External Description;Acc:AAEL003821]
AAEL008693-RA	cation efflux protein zinc transporter	2.60628	up	0.000699482	0.000139325		2.48089	up	0.000221343	5.95375e-05	1.05054	F:ATPase activity; F:ATP binding; P:auxin biosynthetic process	IPR003439; IPR003593; IPR017871; G3DSA:3.40.50.300 (GENE3D), PTHR19229 (PANTHER), PTHR19229:SF30 (PANTHER), PF12698 (PFAM), SSF52540 (SUPERFAMILY)	ATP-binding cassette sub-family A member 3, putative [Source:VB External Description;Acc:AAEL008386]
AAEL005491-RA	abc transporter	2.60344	up	0.00622624	0.00302997		2.8565	up	0.00133168	0.000599636	0.911408	-	no IPS match	conserved hypothetical protein [Source:VB External Description;Acc:AAEL001325]
AAEL013698-RA	restin (cytoplasmic linker protein-170) (clip-170)	2.60269	up	0.00339226	0.00141268		2.61404	up	0.00401746	0.00220592	0.995656	C:nucleus; F:zinc ion binding	IPR007087; IPR012934; IPR013087; IPR015880; PTHR11389 (PANTHER), SSF57667 (SUPERFAMILY), SSF57716 (SUPERFAMILY)	hypothetical protein [Source:VB External Description;Acc:AAEL009208]
AAEL006644-RA	preprotachykinin	2.59976	up	0.0047838	0.00218207		2.70982	up	0.000380023	0.00012493	0.959387	-	seg (SEG)	hypothetical protein [Source:VB External Description;Acc:AAEL009477]
AAEL004607-RA	molybdopterin biosynthesis moeb protein	2.59782	up	0.00014397	3.22233e-06		2.20015	up	0.000453798	0.000158127	1.18075	F:transferase activity, transferring acyl groups other than amino-acyl groups	IPR002656; PTHR11161 (PANTHER)	conserved hypothetical protein [Source:VB External Description;Acc:AAEL007510]
AAEL015021-RA	glycoside hydrolases	2.59773	up	0.00150478	0.000459088		3.87523	up	2.17541e-06	4.63703e-09	0.670342	P:positive regulation of cell growth; P:sex differentiation; P:insulin receptor signaling pathway; P:response to DNA damage stimulus; C:mitochondrial matrix; P:peptidyl-histidine phosphorylation; P:pyruvate metabolic process; P:spermatogenesis; F:pyruvate dehydrogenase (acetyl-transferring) kinase activity; P:anti-apoptosis; P:actin cytoskeleton organization; F:protein serine/threonine kinase act…	tmhmm (TMHMM)	pyruvate dehydrogenase [Source:VB External Description;Acc:AAEL007375]
AAEL005779-RA	cral trio domain-containing protein	2.59755	up	0.000680302	0.000133443		2.71176	up	0.00183445	0.000881648	0.957884	F:metalloendopeptidase activity; P:proteolysis; F:zinc ion binding	IPR001506; IPR006026; IPR024079; PTHR10127 (PANTHER), SSF55486 (SUPERFAMILY)	metalloproteinase, putative [Source:VB External Description;Acc:AAEL011550]
AAEL014887-RA	hypothetical protein AaeL_AAEL014887 [Aedes aegypti]	2.59601	up	0.000525456	8.37808e-05		2.24709	up	6.2103e-05	9.4861e-06	1.15528	P:melanin biosynthetic process from tyrosine; P:indole derivative biosynthetic process; F:dopachrome isomerase activity; C:extracellular region; P:developmental pigmentation	SignalP-NN(euk) (SIGNALP)	dopachrome-conversion enzyme (DCE) isoenzyme, putative [Source:VB External Description;Acc:AAEL000064]
AAEL006880-RB	rab32	2.59456	up	0.000508802	7.94795e-05		2.53083	up	0.000133634	3.04919e-05	1.02518	P:cellular process; P:imaginal disc-derived wing morphogenesis; F:DNA binding; P:open tracheal system development	PTHR23332 (PANTHER)	hypothetical protein [Source:VB External Description;Acc:AAEL000565]
AAEL012301-RA	isoform a	2.59305	up	0.000171395	6.11965e-06		3.32514	up	3.30992e-05	3.35112e-06	0.779832	F:metalloendopeptidase activity; P:proteolysis; C:extracellular matrix; F:zinc ion binding	no IPS match	matrix metalloproteinase [Source:VB External Description;Acc:AAEL002665]
AAEL015113-RA	prophenoloxidase	2.59027	up	0.00384404	0.00165451		3.68822	up	0.00172306	0.000818319	0.702308	F:carboxypeptidase activity	no IPS match	conserved hypothetical protein [Source:VB External Description;Acc:AAEL009861]
AAEL003461-RA	mitochondrial intermediate peptidase	2.5892	up	0.000124129	1.73372e-06		2.44258	up	0.000114747	2.42831e-05	1.06003	P:semicircular canal development	IPR004133; IPR006207; PTHR15283 (PANTHER)	hypothetical protein [Source:VB External Description;Acc:AAEL007659]
AAEL006600-RA	juvenile hormone-inducible	2.58828	up	0.000112855	1.106e-06		2.3359	up	6.18311e-05	9.42032e-06	1.10805	F:structural constituent of cuticle	IPR000618; PTHR10380 (PANTHER), PTHR10380:SF66 (PANTHER)	pupal cuticle protein 78E, putative [Source:VB External Description;Acc:AAEL008866]
AAEL007364-RA	nudt18 protein	2.58711	up	0.000129176	2.04163e-06		2.9396	up	3.97071e-05	4.55927e-06	0.880087	-	no IPS match	conserved hypothetical protein [Source:VB External Description;Acc:AAEL006238]
AAEL002862-RA	tensin	2.58604	up	0.00144043	0.000430964		2.31785	up	0.000179596	4.55301e-05	1.11571	-	SignalP-NN(euk) (SIGNALP), tmhmm (TMHMM)	conserved hypothetical protein [Source:VB External Description;Acc:AAEL014171]
AAEL001100-RA	phosphoserine phosphatase	2.58419	up	0.00546802	0.00258126		2.15159	up	0.00489399	0.00278985	1.20106	-	seg (SEG)	conserved hypothetical protein [Source:VB External Description;Acc:AAEL001295]
AAEL006703-RA	cub domain serine protease	2.58208	up	0.00210053	0.000732432		2.64687	up	0.00013549	3.11412e-05	0.975522	F:serine-type endopeptidase inhibitor activity	IPR002350; G3DSA:3.30.60.30 (GENE3D), PTHR21131 (PANTHER), PS51465 (PROFILE), SSF100895 (SUPERFAMILY)	conserved hypothetical protein [Source:VB External Description;Acc:AAEL006011]
AAEL009634-RB	steroid dehydrogenase	2.5812	up	0.00201041	0.000687954		3.26526	up	4.11268e-05	4.83753e-06	0.790504	F:ATP binding; F:arginine-tRNA ligase activity; P:translation; C:cytoplasm; F:aminoacyl-tRNA ligase activity; F:nucleotide binding; P:arginyl-tRNA aminoacylation; P:tRNA aminoacylation for protein translation	no IPS match	hypothetical protein [Source:VB External Description;Acc:AAEL006284]
AAEL014108-RA	isoform b	2.57651	up	0.00104555	0.000264706		2.76912	up	3.83573e-05	4.34215e-06	0.930444	-	IPR003599; IPR013783; SSF48726 (SUPERFAMILY)	hypothetical protein [Source:VB External Description;Acc:AAEL009036]
AAEL008657-RA	midline fasciclin	2.5753	up	0.000859277	0.000194974		2.31372	up	0.000457269	0.000159625	1.11306	F:sulfotransferase activity	IPR000863; G3DSA:3.40.50.300 (GENE3D), PTHR11783 (PANTHER), PTHR11783:SF3 (PANTHER), SSF52540 (SUPERFAMILY)	sulfotransferase (sult) [Source:VB External Description;Acc:AAEL008898]
AAEL006539-RA	serine threonine protein kinase	2.57273	up	0.000396363	4.8724e-05		2.87121	up	3.2476e-05	3.24144e-06	0.896043	F:nucleic acid binding; C:nucleus; F:zinc ion binding	IPR007087; IPR012934; IPR013087; IPR015880; PTHR24406 (PANTHER), PTHR24406:SF381 (PANTHER), PF12874 (PFAM), SSF57667 (SUPERFAMILY)	hypothetical protein [Source:VB External Description;Acc:AAEL007654]
AAEL009036-RA	hypothetical protein AaeL_AAEL009036 [Aedes aegypti]	2.56594	up	0.00127262	0.000355966		2.51144	up	5.92806e-05	8.80783e-06	1.0217	F:calcium ion binding	IPR002048; IPR011992; IPR018247; IPR018248; IPR018249; PTHR23050 (PANTHER), PTHR23050:SF16 (PANTHER), SSF47473 (SUPERFAMILY)	troponin C [Source:VB External Description;Acc:AAEL000744]
AAEL008384-RA	atp-binding cassette sub-family a member	2.56418	up	0.00171993	0.000551712		2.77799	up	0.000311126	9.5991e-05	0.923037	P:ovarian follicle development; P:positive regulation of phosphoinositide 3-kinase cascade; P:dendrite morphogenesis; P:locomotion; P:androgen receptor signaling pathway; P:prostate gland growth; P:long-term memory; C:cytosol; P:ubiquitin-dependent protein catabolic process; F:ubiquitin-protein ligase activity; F:transcription coactivator activity; P:protein ubiquitination; P:sperm entry; P:posit…	IPR000569; PTHR11254 (PANTHER), PTHR11254:SF68 (PANTHER)	ubiquitin-protein ligase [Source:VB External Description;Acc:AAEL012500]
AAEL008878-RD	diacylglycerol o-acyltransferase	2.56135	up	0.00147222	0.000445886		2.44789	up	2.37218e-05	1.85801e-06	1.04635	P:cell redox homeostasis; F:protein disulfide isomerase activity	IPR012336; IPR013766; PTHR19991 (PANTHER)	conserved hypothetical protein [Source:VB External Description;Acc:AAEL010839]
AAEL014559-RA	atp-dependent dna helicase 2 subunit 2	2.56048	up	0.00314627	0.00128865		2.781	up	2.26934e-05	1.68077e-06	0.920706	F:serine-type endopeptidase activity; P:proteolysis	IPR001254; IPR001314; IPR009003; IPR018114; G3DSA:2.40.10.10 (GENE3D), PTHR24260 (PANTHER), PTHR24260:SF174 (PANTHER)	serine protease [Source:VB External Description;Acc:AAEL010866]
AAEL004724-RA	carboxylesterase	2.55819	up	0.000988528	0.000242469		3.31636	up	2.44273e-05	1.9906e-06	0.771386	F:protein binding; C:integral to membrane	IPR001611; IPR003591; G3DSA:3.80.10.10 (GENE3D), PTHR24371 (PANTHER), PTHR24371:SF115 (PANTHER), SSF52047 (SUPERFAMILY)	leucine-rich transmembrane protein [Source:VB External Description;Acc:AAEL007785]
AAEL013840-RA	pdgf- and vegf-related factor 1-like	2.55716	up	0.000161405	4.94379e-06		2.17543	up	0.000175472	4.40508e-05	1.17547	F:structural constituent of cuticle	IPR000618; PTHR12236 (PANTHER), seg (SEG), SignalP-NN(euk) (SIGNALP)	adult cuticle protein, putative [Source:VB External Description;Acc:AAEL008988]
AAEL005142-RA	cd151 antigen	2.55699	up	0.000609983	0.000110383		2.59779	up	0.000367841	0.000119903	0.984295	-	no IPS match	conserved hypothetical protein [Source:VB External Description;Acc:AAEL013777]
AAEL003737-RA	ankyrin repeat protein	2.55519	up	0.000259965	1.97975e-05		2.80734	up	5.25749e-05	7.15868e-06	0.91018	-	IPR004119; IPR011009; IPR015897; G3DSA:3.90.1200.10 (GENE3D), PTHR11012 (PANTHER)	juvenile hormone-inducible protein, putative [Source:VB External Description;Acc:AAEL012680]
AAEL008878-RC	diacylglycerol o-acyltransferase	2.55216	up	0.00133573	0.000385565		2.52651	up	1.70258e-05	9.09908e-07	1.01015	-	seg (SEG)	cuticle protein, putative [Source:VB External Description;Acc:AAEL002231]
AAEL011128-RA	hypothetical protein AaeL_AAEL011128 [Aedes aegypti]	2.54966	up	0.00162372	0.000511069		3.20218	up	8.32741e-05	1.4982e-05	0.796228	F:kinase activity	IPR005055	protein serine/threonine kinase, putative [Source:VB External Description;Acc:AAEL002027]
AAEL008211-RA	mitochondrial carrier protein	2.54944	up	0.00240712	0.000886228		2.83389	up	0.000259705	7.49802e-05	0.899626	F:protein binding	IPR001611; IPR003591; PR00019 (PRINTS), G3DSA:3.80.10.10 (GENE3D), PTHR23155 (PANTHER), PTHR23155:SF49 (PANTHER), PF12799 (PFAM), SM00364 (SMART), SSF52058 (SUPERFAMILY)	internalin A, putative [Source:VB External Description;Acc:AAEL006068]
AAEL009634-RE	steroid dehydrogenase	2.54787	up	0.00253314	0.000951408		3.1536	up	2.26934e-05	1.68856e-06	0.807925	F:heat shock protein binding	IPR001623; IPR003095; PTHR24077 (PANTHER), PTHR24077:SF99 (PANTHER)	conserved hypothetical protein [Source:VB External Description;Acc:AAEL015218]
AAEL007211-RA	tbc1 domain family member 5	2.54375	up	0.000135787	2.9494e-06		2.12911	up	0.000121285	2.62121e-05	1.19475	C:integral to membrane; P:sodium ion transport; P:transmembrane transport; F:transporter activity	IPR001734; IPR019900; PTHR11819:SF6 (PANTHER)	sodium/solute symporter [Source:VB External Description;Acc:AAEL006487]
AAEL003952-RA	calpain-a-like isoform 3	2.54162	up	0.00187958	0.000627294		2.43648	up	0.000193762	5.02582e-05	1.04315	-	no IPS match	conserved hypothetical protein [Source:VB External Description;Acc:AAEL013987]
AAEL002759-RA	tropomyosin invertebrate	2.53664	up	0.000315153	2.94226e-05		2.40176	up	0.000172622	4.29429e-05	1.05616	-	IPR004119; IPR011009; IPR015897; G3DSA:3.90.1200.10 (GENE3D), PTHR11012 (PANTHER)	juvenile hormone-inducible protein, putative [Source:VB External Description;Acc:AAEL012687]
AAEL014768-RA	glutamate synthase	2.53563	up	0.0040362	0.00175551		2.61504	up	0.000253415	7.23498e-05	0.969634	-	no IPS match	hypothetical protein [Source:VB External Description;Acc:AAEL013699]
AAEL013473-RA	camp-specific -cyclic phosphodiesterase	2.53497	up	0.000407041	5.19648e-05		2.00526	up	0.00700186	0.00420996	1.26416	-	no IPS match	conserved hypothetical protein [Source:VB External Description;Acc:AAEL004595]
AAEL010145-RB	sodium potassium-dependent atpase beta-2 subunit	2.53468	up	0.0014406	0.000431367		2.38346	up	0.00158296	0.000736557	1.06345	C:nucleus; F:cyclin-dependent protein kinase regulator activity; F:general RNA polymerase II transcription factor activity	seg (SEG)	cyclin l [Source:VB External Description;Acc:AAEL002866]
AAEL010724-RA	salivary secreted peptide	2.53006	up	0.000337998	3.53237e-05		2.46872	up	4.36719e-05	5.33553e-06	1.02485	F:heme binding; P:oxidation reduction; F:monooxygenase activity; F:electron carrier activity	IPR001128; IPR002401; IPR017972; PTHR24292 (PANTHER), PTHR24292:SF131 (PANTHER)	cytochrome P450 [Source:VB External Description;Acc:AAEL014893]
AAEL012500-RA	ubiquitin-protein ligase e3a	2.52882	up	0.000605825	0.000109285		2.38624	up	0.000233778	6.42706e-05	1.05975	P:oxidation reduction; F:oxidoreductase activity; F:transition metal ion binding	PTHR21698 (PANTHER)	hypothetical protein [Source:VB External Description;Acc:AAEL008717]
AAEL002759-RC	tropomyosin invertebrate	2.52827	up	0.000424438	5.59924e-05		2.42877	up	0.000123532	2.69802e-05	1.04097	F:hydrolase activity	G3DSA:3.40.50.1820 (GENE3D), PTHR10992 (PANTHER), PTHR10992:SF98 (PANTHER), SSF53474 (SUPERFAMILY)	epoxide hydrolase [Source:VB External Description;Acc:AAEL006342]
AAEL008274-RA	hypothetical protein AaeL_AAEL008274 [Aedes aegypti]	2.52666	up	0.00122019	0.000333976		2.31362	up	0.00138685	0.000628684	1.09208	F:transferase activity	IPR004045; IPR004046; IPR010987; IPR012336; IPR017933; PTHR11260 (PANTHER), PTHR11260:SF37 (PANTHER)	glutathionetransferase [Source:VB External Description;Acc:AAEL007948]
AAEL002759-RB	tropomyosin invertebrate	2.52584	up	0.000346132	3.74461e-05		2.40479	up	0.000242411	6.76851e-05	1.05034	-	no IPS match	conserved hypothetical protein [Source:VB External Description;Acc:AAEL004169]
AAEL014995-RA	ornithine decarboxylase	2.52573	up	0.000708385	0.00014263		2.76203	up	0.000253922	7.26315e-05	0.914448	C:intracellular; P:regulation of transcription, DNA-dependent	IPR001132; IPR008984; IPR017855; PTHR22742 (PANTHER)	conserved hypothetical protein [Source:VB External Description;Acc:AAEL001437]
AAEL012677-RA	sigma dna polymerase	2.51864	up	0.00233291	0.000846902		2.34263	up	0.0041351	0.00228097	1.07513	C:integral to membrane; P:transmembrane transport; F:transporter activity; P:carbohydrate transport	IPR005828; IPR005829; IPR016196; IPR020846; G3DSA:1.20.1250.20 (GENE3D), PTHR24063 (PANTHER), PTHR24063:SF13 (PANTHER)	sugar transporter [Source:VB External Description;Acc:AAEL006482]
AAEL009125-RA	cytochrome p450 CYP6M10	2.5181	up	0.000868432	0.000198009		2.9743	up	0.000355658	0.000114583	0.846618	F:metal ion binding; C:transcription factor complex; P:tetrahydrobiopterin biosynthetic process; F:6-pyruvoyltetrahydropterin synthase activity; P:periodic partitioning by pair rule gene; F:sequence-specific DNA binding; F:transcription activator activity; F:transcription factor activity; P:positive regulation of transcription, DNA-dependent	IPR007115; IPR007116; IPR022470; G3DSA:3.30.479.10 (GENE3D), seg (SEG), SSF55620 (SUPERFAMILY)	6-pyruvoyltetrahydropterin synthase, putative [Source:VB External Description;Acc:AAEL001642]
AAEL002759-RD	tropomyosin invertebrate	2.5177	up	0.000309623	2.81935e-05		2.42559	up	0.000232887	6.3996e-05	1.03797	F:GTPase activator activity; P:signal transduction; C:intracellular	IPR000198; IPR001849; IPR008936; IPR011993; PTHR23178 (PANTHER), PTHR23178:SF8 (PANTHER), SSF50729 (SUPERFAMILY), SSF54236 (SUPERFAMILY)	conserved hypothetical protein [Source:VB External Description;Acc:AAEL003883]
AAEL010866-RA	serine protease	2.51591	up	0.000330339	3.37948e-05		2.49157	up	2.40449e-05	1.92743e-06	1.00977	-	no IPS match	conserved hypothetical protein [Source:VB External Description;Acc:AAEL005135]
AAEL009634-RA	steroid dehydrogenase	2.51072	up	0.00323943	0.00133696		3.19742	up	2.42564e-05	1.97361e-06	0.785234	-	IPR005240; PTHR20992 (PANTHER), PTHR20992:SF9 (PANTHER)	conserved hypothetical protein [Source:VB External Description;Acc:AAEL001495]
AAEL013603-RA	short-chain dehydrogenase	2.50888	up	0.000728542	0.0001496		2.36194	up	0.000117374	2.51307e-05	1.06221	C:nuclear pore; F:SUMO binding; F:nuclear export signal receptor activity; P:multicellular organismal development; F:protein transporter activity; P:protein export from nucleus; P:centriole replication	IPR001494; IPR011989; IPR013598; IPR014877; IPR016024; PTHR11223 (PANTHER), PTHR11223:SF5 (PANTHER)	chromosome region maintenance protein 1/exportin [Source:VB External Description;Acc:AAEL001484]
AAEL002367-RA	carboxylesterase	2.50792	up	0.00117927	0.000316563		2.64758	up	0.000126719	2.79855e-05	0.947248	P:metabolic process; F:sulfuric ester hydrolase activity	IPR000917; IPR017849; IPR017850; G3DSA:3.30.1120.10 (GENE3D), PTHR10342 (PANTHER), PTHR10342:SF76 (PANTHER)	heparan n-sulfatase [Source:VB External Description;Acc:AAEL010437]
AAEL008049-RA	isoform a	2.50601	up	0.0011874	0.000321109		2.927	up	0.000448266	0.00015501	0.856172	F:FAD binding; F:oxidoreductase activity, acting on CH-OH group of donors; P:alcohol metabolic process	IPR000172; IPR007867; IPR012132; G3DSA:3.30.560.10 (GENE3D), G3DSA:3.50.50.60 (GENE3D), G3DSA:4.10.450.10 (GENE3D), PTHR11552 (PANTHER), PTHR11552:SF10 (PANTHER), SSF51905 (SUPERFAMILY), SSF54373 (SUPERFAMILY)	glucose dehydrogenase [Source:VB External Description;Acc:AAEL004009]
AAEL015022-RA	glycoside hydrolases	2.50247	up	0.0058867	0.00282502		2.94917	up	0.000569934	0.000209828	0.848533	C:cytosol; C:integral to membrane	IPR007248	peroxisomal membrane protein 2, pxmp2 [Source:VB External Description;Acc:AAEL006538]
AAEL012853-RA	hypothetical protein AaeL_AAEL012853 [Aedes aegypti]	2.50011	up	0.000120555	1.31547e-06		2.20693	up	0.000370217	0.000121004	1.13285	-	no IPS match	hypothetical protein [Source:VB External Description;Acc:AAEL008935]
AAEL002417-RC	troponin invertebrate	2.49952	up	0.0013437	0.000388854		2.21893	up	2.12024e-05	1.46052e-06	1.12645	F:structural constituent of cuticle	seg (SEG), SignalP-NN(euk) (SIGNALP)	pupal cuticle protein, putative [Source:VB External Description;Acc:AAEL008285]
AAEL008657-RB	midline fasciclin	2.4994	up	0.000757659	0.000160499		2.26231	up	0.000163651	3.98664e-05	1.1048	F:receptor binding; P:response to fungus; P:immune response; P:cell development; P:regulation of biological process; P:dorsal/ventral axis specification; P:defense response	SSF57501 (SUPERFAMILY)	SpÃ¤tzle 1A (Spz1A) [Source:VB External Description;Acc:AAEL013434]
AAEL012614-RA	isocitrate dehydrogenase	2.4986	up	0.00437945	0.00195524		3.40203	up	3.5178e-05	3.75557e-06	0.734445	P:biosynthetic process; C:lipid particle; F:strictosidine synthase activity	IPR011042; IPR018119; PTHR10426 (PANTHER), PTHR10426:SF3 (PANTHER), SSF63829 (SUPERFAMILY)	hemomucin [Source:VB External Description;Acc:AAEL004868]
AAEL014456-RA	hypothetical protein AaeL_AAEL014456 [Aedes aegypti]	2.49259	up	0.00173714	0.000560813		2.54384	up	9.43087e-05	1.80158e-05	0.979853	-	PS51257 (PROFILE)	conserved hypothetical protein [Source:VB External Description;Acc:AAEL001639]
AAEL001810-RA	isoform b	2.49146	up	0.0016418	0.000519172		2.43947	up	0.000340872	0.000108183	1.02131	F:zinc ion binding; C:intracellular	no IPS match	hypothetical protein [Source:VB External Description;Acc:AAEL005986]
AAEL008677-RA	grb2-associated gab	2.48851	up	0.000398486	4.97075e-05		2.17154	up	0.000418344	0.000141756	1.14596	-	no IPS match	conserved hypothetical protein [Source:VB External Description;Acc:AAEL006971]
AAEL001100-RC	phosphoserine phosphatase	2.48445	up	0.00264583	0.00100491		2.18169	up	0.00508913	0.00291653	1.13877	-	PTHR12336 (PANTHER)	cuticle protein, putative [Source:VB External Description;Acc:AAEL002241]
AAEL011050-RA	activating signal cointegrator 1 complex subunit 1	2.48426	up	0.000361456	4.00781e-05		2.51987	up	0.000103534	2.08459e-05	0.985868	-	seg (SEG), SignalP-NN(euk) (SIGNALP)	conserved hypothetical protein [Source:VB External Description;Acc:AAEL014657]
AAEL009311-RA	3-hydroxy-3-methylglutaryl-coenzyme a reductase	2.48387	up	0.000318889	3.00201e-05		2.0975	up	0.00097024	0.000403664	1.18421	F:5-formyltetrahydrofolate cyclo-ligase activity; F:ATP binding; C:cytoplasmic part; P:folic acid and derivative biosynthetic process	no IPS match	5-formyltetrahydrofolate cyclo-ligase [Source:VB External Description;Acc:AAEL010694]
AAEL009648-RA	upf0493 protein aael009648	2.48194	up	0.000819047	0.000181822		2.26884	up	8.19878e-05	1.45434e-05	1.09392	-	no IPS match	conserved hypothetical protein [Source:VB External Description;Acc:AAEL013895]
AAEL011199-RA	coiled-coil domain-containing protein 76	2.48038	up	0.000792624	0.000172956		2.30042	up	0.000126244	2.78487e-05	1.07823	F:palmitoyl-(protein) hydrolase activity; P:protein modification process	IPR002472; G3DSA:3.40.50.1820 (GENE3D), PTHR11247 (PANTHER), PTHR11247:SF4 (PANTHER), PS00120 (PROSITE), SSF53474 (SUPERFAMILY)	palmitoyl-protein thioesterase [Source:VB External Description;Acc:AAEL001235]
AAEL003046-RA	saposin- isoform a	2.47854	up	0.000432195	5.80884e-05		2.15267	up	0.000173731	4.34822e-05	1.15138	-	no IPS match	conserved hypothetical protein [Source:VB External Description;Acc:AAEL012837]
AAEL001437-RA	isoform b	2.47838	up	0.000249688	1.70089e-05		2.81681	up	0.000332664	0.000104527	0.879855	F:transferase activity, transferring acyl groups other than amino-acyl groups	IPR002656; IPR006621; PTHR11161 (PANTHER)	conserved hypothetical protein [Source:VB External Description;Acc:AAEL008948]
AAEL014594-RA	cytochrome p450	2.47435	up	0.000916611	0.000214722		2.01871	up	0.00028778	8.65655e-05	1.22571	C:cytoplasm; P:proteolysis; F:dipeptidyl-peptidase activity; F:serine-type peptidase activity	IPR005320; G3DSA:3.40.50.880 (GENE3D), PTHR20842 (PANTHER), SSF52317 (SUPERFAMILY)	protease S51 alpha-aspartyl dipeptidase [Source:VB External Description;Acc:AAEL014671]
AAEL009727-RA	zinc finger protein 671	2.46856	up	0.00156206	0.000484546		2.43497	up	6.93156e-05	1.12534e-05	1.01379	F:heme binding; P:oxidation reduction; F:monooxygenase activity; F:electron carrier activity	IPR001128; IPR002401; IPR017972; PTHR24292 (PANTHER), PTHR24292:SF175 (PANTHER)	cytochrome P450 [Source:VB External Description;Acc:AAEL014609]
AAEL015076-RA	z band alternatively spliced pdz-motif protein isoform f	2.4658	up	0.00024066	1.53504e-05		2.27557	up	4.5055e-05	5.63543e-06	1.0836	F:receptor activity; P:cell adhesion; P:salivary gland cell autophagic cell death; C:membrane	IPR002159; PTHR11923:SF19 (PANTHER)	ClassB Scavenger Receptor (CD36 domain). [Source:VB External Description;Acc:AAEL000227]
AAEL012031-RA	centrosomal protein of 152 kda	2.46526	up	0.00787261	0.00404642		3.18976	up	0.00448415	0.00251883	0.772869	F:ATP binding; P:regulation of protein metabolic process; F:small conjugating protein ligase activity; P:post-translational protein modification	seg (SEG), tmhmm (TMHMM)	ubiquitin-conjugating enzyme m [Source:VB External Description;Acc:AAEL009026]
AAEL009634-RF	steroid dehydrogenase	2.46462	up	0.00176451	0.000573812		3.01819	up	2.3574e-05	1.81141e-06	0.816589	C:integral to membrane	IPR002076; PTHR11157:SF4 (PANTHER)	elongase, putative [Source:VB External Description;Acc:AAEL012402]
AAEL001325-RB	hypothetical protein AaeL_AAEL001325 [Aedes aegypti]	2.46422	up	0.00192245	0.00064796		2.20852	up	0.000661056	0.000252813	1.11578	C:integral to membrane; P:transmembrane transport; F:transporter activity; P:carbohydrate transport	IPR005828; IPR005829; IPR016196; IPR020846; G3DSA:1.20.1250.20 (GENE3D), PTHR24063 (PANTHER), PTHR24063:SF13 (PANTHER)	sugar transporter [Source:VB External Description;Acc:AAEL003899]
AAEL012579-RA	aspartate aminotransferase	2.46369	up	0.00275367	0.00106544		2.02205	up	0.000431424	0.000147224	1.21841	-	seg (SEG)
AAEL013030-RA	cuticular protein 72ec	2.46026	up	0.000653101	0.000124406		2.34191	up	0.000468155	0.000164313	1.05054	P:oxidative phosphorylation; C:mitochondrial respiratory chain complex I	seg (SEG), SignalP-NN(euk) (SIGNALP), tmhmm (TMHMM)	chaperone protein, putative [Source:VB External Description;Acc:AAEL014201]
AAEL000992-RA	hypothetical protein AaeL_AAEL000992 [Aedes aegypti]	2.45642	up	0.00485131	0.00222654		2.55685	up	4.34929e-05	5.28224e-06	0.960721	C:integral to membrane	IPR004299; PTHR13906 (PANTHER), PTHR13906:SF4 (PANTHER)	porcupine [Source:VB External Description;Acc:AAEL011051]
AAEL001325-RA	hypothetical protein AaeL_AAEL001325 [Aedes aegypti]	2.45192	up	0.00227926	0.000818769		2.1718	up	0.000817873	0.000329113	1.12898	F:serine-type endopeptidase activity; P:proteolysis	no IPS match	coagulation factor X, putative [Source:VB External Description;Acc:AAEL002582]
AAEL010755-RB	ww domain-containing adapter protein with coiled-coil	2.45117	up	0.00304405	0.00122925		2.45901	up	0.000533197	0.00019253	0.996811	P:lipid homeostasis; C:lipid particle; P:determination of adult lifespan; P:triglyceride catabolic process; F:triglyceride lipase activity; P:triglyceride mobilization	seg (SEG), SignalP-NN(euk) (SIGNALP)	hypothetical protein [Source:VB External Description;Acc:AAEL011918]
AAEL012680-RA	juvenile hormone-inducible	2.4499	up	0.00065943	0.000126845		2.99978	up	0.000253642	7.25196e-05	0.816696	F:hydrolase activity	IPR002821; IPR003692; IPR008040; PTHR11365 (PANTHER)	conserved hypothetical protein [Source:VB External Description;Acc:AAEL000581]
AAEL006484-RA	rhodopsin	2.44714	up	0.000169859	5.73025e-06		2.49615	up	0.000164421	4.01965e-05	0.980366	P:glycolysis; F:2,3-bisphosphoglycerate-dependent phosphoglycerate mutase activity	IPR005952; IPR013078; G3DSA:3.40.50.1240 (GENE3D), SSF53254 (SUPERFAMILY)	phosphoglycerate mutase [Source:VB External Description;Acc:AAEL007495]
AAEL002417-RA	troponin invertebrate	2.4444	up	0.000293284	2.52422e-05		2.18188	up	1.99544e-05	1.27567e-06	1.12032	F:DNA binding	IPR004210; IPR006578	hypothetical protein [Source:VB External Description;Acc:AAEL008052]
AAEL003748-RA	cytochrome p450	2.44416	up	0.00310493	0.00126487		2.40751	up	3.05019e-05	2.85943e-06	1.01522	F:hydrolase activity; P:metabolic process	IPR002018; IPR002168; IPR019819; IPR019826; G3DSA:3.40.50.1820 (GENE3D), PTHR11559 (PANTHER), PTHR11559:SF116 (PANTHER), SSF53474 (SUPERFAMILY)
AAEL010234-RA	protein tyrosine non-receptor type nt6	2.44341	up	0.00391451	0.00169252		2.29833	up	0.00139622	0.000633282	1.06313	C:integral to membrane; P:phagocytosis, engulfment	IPR001107; IPR001972; PTHR10264:SF37 (PANTHER), SSF117892 (SUPERFAMILY)	prohibitin, putative [Source:VB External Description;Acc:AAEL011803]
AAEL010314-RA	f-box lrr	2.44271	up	0.000127342	1.88482e-06		2.66293	up	0.000161635	3.9186e-05	0.9173	P:axon guidance; P:peripheral nervous system development; F:phosphoserine phosphatase activity; P:L-serine biosynthetic process	no IPS match	phosphoserine phosphatase [Source:VB External Description;Acc:AAEL001100]
AAEL002600-RA	serine protease	2.44167	up	0.000468287	6.86194e-05		2.57967	up	2.4917e-05	2.07143e-06	0.946505	-	IPR005055	conserved hypothetical protein [Source:VB External Description;Acc:AAEL001957]
AAEL009105-RA	autophagy protein 9	2.43923	up	0.000203732	9.74066e-06		2.24508	up	5.87598e-05	8.70075e-06	1.08648	-	no IPS match	conserved hypothetical protein [Source:VB External Description;Acc:AAEL003864]
AAEL012317-RA	hypothetical protein AaeL_AAEL012317 [Aedes aegypti]	2.4376	up	0.00297622	0.00119155		2.26226	up	0.0007075	0.000274508	1.0775	-	no IPS match	conserved hypothetical protein [Source:VB External Description;Acc:AAEL005669]
AAEL008351-RA	possible integral membrane efflux protein	2.43573	up	0.00132067	0.000378436		2.96425	up	0.000218746	5.86731e-05	0.821703	C:voltage-gated potassium channel complex; F:voltage-gated potassium channel activity; F:protein binding; P:potassium ion transport	seg (SEG)	conserved hypothetical protein [Source:VB External Description;Acc:AAEL005423]
AAEL009477-RB	hypothetical protein AaeL_AAEL009477 [Aedes aegypti]	2.43567	up	0.000722714	0.000147628		2.73926	up	2.41147e-05	1.94989e-06	0.889172	P:metal ion transport; C:membrane; F:metal ion transmembrane transporter activity; P:transmembrane transport	IPR003689; PTHR11040 (PANTHER), PTHR11040:SF4 (PANTHER)	zinc/iron transporter [Source:VB External Description;Acc:AAEL013756]
AAEL015460-RA	larval cuticle protein	2.43482	up	0.00238129	0.000873511		2.21312	up	1.72229e-05	9.33499e-07	1.10017	-	IPR000782	conserved hypothetical protein [Source:VB External Description;Acc:AAEL006905]
AAEL006068-RA	leucine-rich repeat-containing protein 57	2.43229	up	0.000721779	0.000146796		2.51069	up	2.20426e-05	1.57069e-06	0.968773	-	no IPS match	conserved hypothetical protein [Source:VB External Description;Acc:AAEL005464]
AAEL003184-RA	mfs transporter	2.4178	up	0.000135787	2.96833e-06		2.62463	up	2.94808e-05	2.72823e-06	0.921197	F:heme binding; P:oxidation reduction; F:monooxygenase activity; F:electron carrier activity	IPR001128; IPR002401; IPR017972; PTHR24292 (PANTHER), PTHR24292:SF131 (PANTHER)	cytochrome P450 [Source:VB External Description;Acc:AAEL009125]
AAEL008589-RA	mannose-binding protein-associated serine protease	2.41531	up	0.000479897	7.15553e-05		2.03287	up	0.00147385	0.00067706	1.18813	F:heme binding; P:oxidation reduction; F:monooxygenase activity; F:electron carrier activity	IPR001128; IPR002401; IPR017972; PTHR24292 (PANTHER), PTHR24292:SF175 (PANTHER)	cytochrome P450 [Source:VB External Description;Acc:AAEL014616]
AAEL010937-RA	ws beta-transducin repeats protein	2.41238	up	0.000451776	6.42019e-05		2.23752	up	0.000459349	0.000160526	1.07815	-	no IPS match	conserved hypothetical protein [Source:VB External Description;Acc:AAEL005669]
AAEL005319-RA		2.41179	up	0.000785473	0.000169855		2.0895	up	0.000207169	5.49658e-05	1.15424	F:serine-type endopeptidase inhibitor activity; F:peptidase activity	IPR000215; IPR023796; G3DSA:2.30.39.10 (GENE3D), G3DSA:3.30.497.10 (GENE3D), PTHR11461:SF28 (PANTHER), seg (SEG), SignalP-NN(euk) (SIGNALP)	serine protease inhibitor (serpin), likely cleavage at S/L. [Source:VB External Description;Acc:AAEL014138]
AAEL014980-RA	serpin 11 non-inhibitory serine protease inhibitor	2.41119	up	0.00213131	0.000748125		2.59112	up	4.48006e-05	5.58097e-06	0.930561	P:axonogenesis; C:plasma membrane	IPR000782; PTHR10900 (PANTHER), PTHR10900:SF9 (PANTHER), seg (SEG)	midline fasciclin [Source:VB External Description;Acc:AAEL008657]
AAEL009658-RA	membrane-bound trehalase	2.41091	up	0.00138151	0.000404026		2.68798	up	0.000208351	5.54639e-05	0.896921	F:serine-type endopeptidase inhibitor activity; F:peptidase activity	IPR000215; IPR023796; G3DSA:2.30.39.10 (GENE3D), G3DSA:3.30.497.10 (GENE3D), PTHR11461:SF115 (PANTHER)	serine protease inhibitor (serpin-2), putative [Source:VB External Description;Acc:AAEL014980]
AAEL007654-RA	zinc finger protein 430	2.40792	up	0.000924666	0.000218813		2.2756	up	0.000132928	3.01965e-05	1.05815	F:chitin binding; C:extracellular region; P:chitin metabolic process	IPR002557; PTHR23301 (PANTHER), seg (SEG), SignalP-NN(euk) (SIGNALP)	hypothetical protein [Source:VB External Description;Acc:AAEL011337]
AAEL000615-RA	possible mucin	2.40333	up	0.000240526	1.48466e-05		2.4869	up	2.49896e-05	2.08062e-06	0.966399	F:catalytic activity; P:metabolic process; F:binding	IPR004262; IPR013120; IPR016040; PTHR11011 (PANTHER), PTHR11011:SF19 (PANTHER), SSF51735 (SUPERFAMILY)	conserved hypothetical protein [Source:VB External Description;Acc:AAEL000910]
AAEL009658-RC	membrane-bound trehalase	2.39703	up	0.000808237	0.000177848		2.59442	up	0.000124418	2.73044e-05	0.923918	P:sodium ion transport; C:sodium:potassium-exchanging ATPase complex; F:sodium:potassium-exchanging ATPase activity; C:septate junction; P:potassium ion transport; P:septate junction assembly; P:ATP biosynthetic process; F:cation transmembrane transporter activity; P:establishment of glial blood-brain barrier; P:regulation of tube diameter, open tracheal system; P:regulation of tube length, open …	IPR000402; G3DSA:1.20.5.170 (GENE3D), PTHR11523:SF15 (PANTHER)	sodium/potassium-dependent ATPase beta-2 subunit [Source:VB External Description;Acc:AAEL010145]
AAEL001692-RA	hypothetical protein AaeL_AAEL001692 [Aedes aegypti]	2.39655	up	0.000383571	4.5888e-05		2.10312	up	0.00326991	0.0017372	1.13952	F:DNA binding	no IPS match	conserved hypothetical protein [Source:VB External Description;Acc:AAEL003160]
AAEL010532-RA	alpha-amylase	2.3933	up	0.000290404	2.47565e-05		2.48899	up	6.13041e-06	9.6414e-08	0.961553	P:histidine catabolic process; F:dopamine beta-monooxygenase activity	IPR005018	hypothetical protein [Source:VB External Description;Acc:AAEL009385]
AAEL004786-RA	usher syndrome type-1g protein	2.39215	up	0.00102863	0.000257981		2.27677	up	0.000142392	3.33718e-05	1.05068	C:integral to membrane	seg (SEG)	conserved hypothetical protein [Source:VB External Description;Acc:AAEL013742]
AAEL000903-RA	enhancer of yellow 2	2.39107	up	0.00778118	0.00398277		2.62831	up	0.000192969	5.00038e-05	0.909734	F:G-protein coupled receptor activity; P:phototransduction; P:protein-chromophore linkage; P:G-protein coupled receptor protein signaling pathway; F:photoreceptor activity; P:visual perception; C:integral to membrane	IPR000276; IPR001391; IPR001760; IPR017452; G3DSA:1.20.1070.10 (GENE3D), PTHR24240 (PANTHER), PTHR24240:SF18 (PANTHER), SSF81321 (SUPERFAMILY)	GPCR (Rhod)opsin Family [Source:VB External Description;Acc:AAEL006484]
AAEL003153-RA	zinc finger protein 25	2.38496	up	0.000661109	0.000127329		2.52482	up	7.93048e-06	2.0496e-07	0.944607	C:integral to membrane; F:substrate-specific transmembrane transporter activity; P:transmembrane transport; P:carbohydrate transport	IPR005828; IPR005829; IPR016196; IPR020846; G3DSA:1.20.1250.20 (GENE3D), PTHR24063 (PANTHER), PTHR24063:SF13 (PANTHER)	sugar transporter [Source:VB External Description;Acc:AAEL010219]
AAEL015466-RA	isoform a	2.3845	up	0.000171395	6.13174e-06		2.08781	up	0.000933627	0.000385246	1.14211	-	IPR003534; IPR011042	yellow protein, putative [Source:VB External Description;Acc:AAEL004409]
AAEL003092-RA	cg5639 cg5639-pa	2.38407	up	0.000438234	6.03498e-05		2.97455	up	8.11004e-05	1.42543e-05	0.801489	F:protein binding	IPR011705	conserved hypothetical protein [Source:VB External Description;Acc:AAEL005602]
AAEL013756-RA	zinc iron transporter	2.38345	up	0.00120772	0.000328783		2.02681	up	0.00127634	0.000570684	1.17596	F:ligase activity; P:metabolic process	IPR000873; IPR020845; G3DSA:2.30.38.10 (GENE3D), G3DSA:3.30.300.30 (GENE3D), G3DSA:3.40.50.980 (GENE3D), PTHR24096 (PANTHER), PTHR24096:SF38 (PANTHER), SSF56801 (SUPERFAMILY)	AMP dependent ligase [Source:VB External Description;Acc:AAEL002929]
AAEL005407-RB	annexin x	2.38122	up	0.000477003	7.10654e-05		2.38553	up	4.58908e-05	5.85548e-06	0.998197	P:striated muscle contraction; P:dorsal closure, amnioserosa morphology change; P:establishment of neuroblast polarity; C:unconventional myosin complex; P:myosin II filament assembly; P:skeletal muscle thick filament assembly; P:ecdysone-mediated induction of salivary gland cell autophagic cell death; P:Malpighian tubule morphogenesis; P:dorsal closure, spreading of leading edge cells; P:sarcomer…	IPR000048; IPR001609; IPR002928; IPR004009; IPR015650; G3DSA:4.10.270.10 (GENE3D), PTHR13140 (PANTHER), SSF52540 (SUPERFAMILY)	myosin heavy chain, nonmuscle or smooth muscle [Source:VB External Description;Acc:AAEL005733]
AAEL004824-RA	nose resistant to fluoxetine protein 6	2.37975	up	0.000455431	6.53336e-05		2.20898	up	0.00147526	0.000678081	1.07731	P:proteolysis; F:serine-type endopeptidase activity; F:catalytic activity; P:cell adhesion; C:extracellular matrix; P:angiogenesis; P:skeletal muscle tissue development	IPR001791; IPR008985; IPR012680; IPR013320	hypothetical protein [Source:VB External Description;Acc:AAEL013411]
AAEL009132-RA	cytochrome p450	2.37972	up	0.00101297	0.000251815		3.33956	up	5.71791e-06	8.47883e-08	0.712583	F:actin binding; P:actomyosin structure organization	IPR000557; IPR001715; IPR001997; IPR003096; PTHR18959 (PANTHER), PTHR18959:SF3 (PANTHER)	calponin/transgelin [Source:VB External Description;Acc:AAEL008303]
AAEL011863-RA	abc transporter	2.37914	up	0.00386753	0.00166746		2.8368	up	0.000117457	2.51683e-05	0.838671	P:pathogenesis	no IPS match	conserved hypothetical protein [Source:VB External Description;Acc:AAEL004521]
AAEL006701-RA	peritrophic matrix protein 2-a	2.36968	up	0.0017776	0.000580629		2.00721	up	3.8141e-05	4.29603e-06	1.18058	F:binding; F:oxidoreductase activity; P:oxidation reduction	IPR002198; IPR002347; IPR016040; PIRSF000126 (PIR), PTHR24316 (PANTHER), PTHR24316:SF36 (PANTHER), SSF51735 (SUPERFAMILY)	short-chain dehydrogenase [Source:VB External Description;Acc:AAEL004273]
AAEL014591-RA	isoform i	2.36742	up	0.000203732	9.88094e-06		2.71334	up	2.9395e-05	2.70739e-06	0.872509	C:cytoplasm; P:protein autoprocessing; F:calcium-dependent cysteine-type endopeptidase activity; F:calcium ion binding; P:proteolysis; P:phagocytosis, engulfment; P:actin cytoskeleton organization	IPR000169; IPR001300; IPR002048; IPR011992; IPR018247; IPR018249; IPR022682; IPR022683; IPR022684; G3DSA:2.60.120.380 (GENE3D), G3DSA:3.90.70.10 (GENE3D), PTHR10183 (PANTHER), PTHR10183:SF45 (PANTHER), SSF47473 (SUPERFAMILY), SSF54001 (SUPERFAMILY)	calpain 4, 6, 7, invertebrate [Source:VB External Description;Acc:AAEL003965]
AAEL005407-RC	annexin x	2.36575	up	0.0004989	7.64059e-05		2.36626	up	0.000107944	2.20934e-05	0.999785	P:embryonic heart tube anterior/posterior pattern formation; P:embryonic gut morphogenesis; P:cell-cell signaling; F:zinc ion binding; P:cellular response to follicle-stimulating hormone stimulus; P:embryonic foregut morphogenesis; P:regulation of cardiac muscle cell proliferation; P:gastrulation with mouth forming second; P:response to estrogen stimulus; F:specific RNA polymerase II transcriptio…	IPR000679; IPR013088; PTHR10071 (PANTHER), SSF57716 (SUPERFAMILY)	transcription factor GATA-4 (GATA binding factor-4) [Source:VB External Description;Acc:AAEL010222]
AAEL002417-RB	troponin invertebrate	2.36345	up	0.000524481	8.33692e-05		2.22251	up	3.97869e-05	4.59878e-06	1.06341	-	no IPS match	conserved hypothetical protein [Source:VB External Description;Acc:AAEL001561]
AAEL003122-RA	z band alternatively spliced pdz-motif protein isoform l	2.36188	up	0.000244583	1.59613e-05		2.28094	up	2.85683e-05	2.58071e-06	1.03549	P:glycerol metabolic process; F:glycerophosphodiester phosphodiesterase activity; P:intracellular signaling pathway; F:phospholipase C activity; P:lipid metabolic process	IPR000909; IPR004129; IPR017946; PTHR22958 (PANTHER)	conserved hypothetical protein [Source:VB External Description;Acc:AAEL014352]
AAEL006207-RA	hypothetical protein AaeL_AAEL006207 [Aedes aegypti]	2.34972	up	0.000336277	3.4979e-05		2.76929	up	0.000301176	9.21223e-05	0.84849	P:carbohydrate metabolic process; F:hydrolase activity, hydrolyzing O-glycosyl compounds; F:cation binding	seg (SEG)	alpha-galactosidase/alpha-n-acetylgalactosaminidase [Source:VB External Description;Acc:AAEL005460]
AAEL001495-RB	uncharacterized protein	2.34708	up	0.000524481	8.3408e-05		2.40197	up	0.0002078	5.51595e-05	0.977148	F:hydrolase activity; F:nucleic acid binding; F:metal ion binding	IPR001604; IPR020821; SSF54060 (SUPERFAMILY)	deoxyribonuclease I, putative [Source:VB External Description;Acc:AAEL001641]
AAEL003298-RA	alkaline phosphatase	2.34669	up	0.000924101	0.000217948		2.7325	up	4.03419e-05	4.71463e-06	0.858806	P:transmembrane transport; P:regulation of female receptivity; P:endosome to lysosome transport; P:larval central nervous system remodeling; P:peripheral nervous system development; P:locomotion; P:regulation of synaptic growth at neuromuscular junction; P:regulation of nurse cell apoptosis; P:synaptic vesicle endocytosis; P:courtship behavior; C:plasma membrane	IPR011701; IPR016196; IPR020846; G3DSA:1.20.1250.20 (GENE3D), PTHR24001 (PANTHER)	POSSIBLE INTEGRAL MEMBRANE EFFLUX PROTEIN EFPA, putative [Source:VB External Description;Acc:AAEL008351]
AAEL003266-RA	cuticular protein rr-1 family (agap009872-pa)	2.34381	up	0.000186691	8.14776e-06		2.15692	up	2.46447e-05	2.02492e-06	1.08665	-	no IPS match	hypothetical protein [Source:VB External Description;Acc:AAEL013447]
AAEL009193-RA	glucose dehydrogenase	2.33752	up	0.00147967	0.000449412		2.77294	up	0.00187339	0.000904388	0.842973	F:ligase activity; P:metabolic process	IPR000873; IPR020845; G3DSA:2.30.38.10 (GENE3D), G3DSA:3.30.300.30 (GENE3D), G3DSA:3.40.50.980 (GENE3D), PTHR24096 (PANTHER), PTHR24096:SF43 (PANTHER), SSF56801 (SUPERFAMILY)	AMP dependent coa ligase [Source:VB External Description;Acc:AAEL000415]
AAEL003135-RA	isoform b	2.33699	up	0.00238423	0.000875464		2.0649	up	0.00348925	0.00187313	1.13177	-	no IPS match	conserved hypothetical protein [Source:VB External Description;Acc:AAEL008444]
AAEL005342-RA	isoform b	2.33462	up	0.00427016	0.0018918		2.6281	up	0.00895752	0.00555106	0.88833	F:heme binding; P:oxidation reduction; F:monooxygenase activity; F:electron carrier activity	IPR001128; IPR002402; IPR017972; PTHR24292 (PANTHER), PTHR24292:SF131 (PANTHER), seg (SEG), SignalP-NN(euk) (SIGNALP), tmhmm (TMHMM)	cytochrome P450 [Source:VB External Description;Acc:AAEL009132]
AAEL002349-RA	acetyl-coenzyme a transporter 1	2.33421	up	0.00449462	0.00202484		2.13953	up	0.00120121	0.000528896	1.09099	F:serine-type carboxypeptidase activity; P:proteolysis	IPR001563; IPR018202; G3DSA:3.40.50.1820 (GENE3D), PS51257 (PROFILE), SSF53474 (SUPERFAMILY)	retinoid-inducible serine carboxypeptidase (serine carboxypeptidase [Source:VB External Description;Acc:AAEL009291]
AAEL006285-RA	hypothetical protein AaeL_AAEL006285 [Aedes aegypti]	2.32832	up	0.000259965	1.99131e-05		2.51641	up	3.72236e-05	4.15738e-06	0.925257	P:glutamate biosynthetic process; F:glutamate synthase (NADH) activity; F:iron-sulfur cluster binding; F:iron ion binding; F:FMN binding; P:oxidation reduction; F:FAD binding	no IPS match	glutamate synthase [Source:VB External Description;Acc:AAEL014768]
AAEL006238-RB	hypothetical protein AaeL_AAEL006238 [Aedes aegypti]	2.32763	up	0.00965171	0.00522791		2.53621	up	0.000271781	7.99032e-05	0.91776	P:glyoxylate cycle; P:2-oxoglutarate metabolic process; C:mitochondrial inner membrane; P:oxidation reduction; P:tricarboxylic acid cycle; F:NAD or NADH binding; F:isocitrate dehydrogenase (NADP+) activity; F:magnesium ion binding; P:isocitrate metabolic process	IPR004790; IPR024084; SSF53659 (SUPERFAMILY)	NADP-specific isocitrate dehydrogenase [Source:VB External Description;Acc:AAEL012614]
AAEL000564-RB	myotubularin-related protein 3	2.32707	up	0.00199934	0.000681226		2.3853	up	2.79777e-05	2.52029e-06	0.975586	C:integral to membrane	IPR007603; PTHR12385:SF10 (PANTHER)	CTL-like protein 1 [Source:VB External Description;Acc:AAEL001935]
AAEL008948-RA	hypothetical protein AaeL_AAEL008948 [Aedes aegypti]	2.32489	up	0.000994988	0.000244907		2.31039	up	0.000137437	3.17735e-05	1.00628	C:intracellular; F:GTPase activity; F:protein binding; F:GTP binding; P:small GTPase mediated signal transduction	IPR000210; IPR001806; IPR003578; IPR011333; IPR013069; G3DSA:3.40.50.300 (GENE3D), PTHR24072 (PANTHER), PTHR24072:SF38 (PANTHER), SSF52540 (SUPERFAMILY)	rhoGTPase [Source:VB External Description;Acc:AAEL014636]
AAEL015045-RA	transcription factor	2.32488	up	0.0015608	0.000483616		2.57379	up	8.13893e-05	1.43344e-05	0.90329	F:serine-type endopeptidase activity; P:proteolysis	IPR001254; IPR001314; IPR009003; IPR018114; G3DSA:2.40.10.10 (GENE3D), PTHR24268 (PANTHER), PTHR24268:SF174 (PANTHER)	serine protease [Source:VB External Description;Acc:AAEL002600]
AAEL014226-RA	papillote protein	2.32242	up	0.00142089	0.000423378		2.08522	up	0.00433809	0.0024165	1.11376	P:protein folding; F:heat shock protein binding; F:unfolded protein binding	IPR001623; IPR003095; IPR015399; PTHR24077 (PANTHER), PTHR24077:SF17 (PANTHER)	DNA-J, putative [Source:VB External Description;Acc:AAEL013199]
AAEL003316-RA	hypothetical protein AaeL_AAEL003316 [Aedes aegypti]	2.32174	up	0.00455745	0.00206149		2.20055	up	0.00883418	0.00546346	1.05507	F:polyspecific organic cation transmembrane transporter activity; P:transmembrane transport; P:carbohydrate transport	IPR011701; IPR016196; PTHR24064 (PANTHER), PTHR24064:SF100 (PANTHER)	sugar transporter [Source:VB External Description;Acc:AAEL007930]
AAEL012704-RA	achain crystal structure of sterol carrier protein-2 like-3 (scp2- l3) from aedes aegypti	2.32095	up	0.00123085	0.000338853		3.67085	up	0.00122952	0.000544159	0.632265	P:wing disc dorsal/ventral pattern formation; P:RNA interference; P:oocyte microtubule cytoskeleton polarization; P:regulation of cell shape; F:neuropeptide hormone activity; P:regulation of heart contraction; P:actin polymerization or depolymerization; P:neuropeptide signaling pathway; F:myostimulatory hormone activity; C:RNA-induced silencing complex; F:diuretic hormone activity; P:rhabdomere d…	IPR000108; IPR001452; G3DSA:2.30.30.40 (GENE3D), PTHR10661 (PANTHER)	dcapl [Source:VB External Description;Acc:AAEL012888]
AAEL008854-RA	ring finger protein 10	2.3205	up	0.00184145	0.000609829		2.26774	up	5.86269e-05	8.65886e-06	1.02326	F:serine-type endopeptidase inhibitor activity; F:peptidase activity	IPR000215; IPR023795; IPR023796; G3DSA:2.30.39.10 (GENE3D), G3DSA:3.30.497.10 (GENE3D), PTHR11461:SF28 (PANTHER)	serine protease inhibitor (serpin), likely cleavage at S/A. [Source:VB External Description;Acc:AAEL010769]
AAEL004675-RA	transcriptional adaptor 3	2.32021	up	0.000344404	3.67528e-05		2.20271	up	0.000207967	5.52909e-05	1.05334	P:metabolic process; C:mitochondrion; F:lyase activity	IPR001753; G3DSA:3.90.226.10 (GENE3D), PTHR11941 (PANTHER), SSF52096 (SUPERFAMILY)	cyclohex-1-ene-1-carboxyl-CoA hydratase, putative [Source:VB External Description;Acc:AAEL011736]
AAEL008173-RA	arrestin domain-containing protein 2	2.31948	up	0.000482738	7.25683e-05		2.31998	up	0.000507175	0.000181019	0.999786	P:fatty acid biosynthetic process; C:integral to membrane; P:oxidation reduction; F:oxidoreductase activity, acting on paired donors, with oxidation of a pair of donors resulting in the reduction of molecular oxygen to two molecules of water	IPR005804; IPR015876; PTHR11351 (PANTHER)	delta(9)-desaturase, putative [Source:VB External Description;Acc:AAEL003622]
AAEL003965-RA	calpain	2.31848	up	0.000445319	6.2185e-05		2.11984	up	0.000342307	0.000108855	1.0937	F:zinc ion binding; C:nucleus	no IPS match	hypothetical protein [Source:VB External Description;Acc:AAEL005100]
AAEL009236-RA	glycoside hydrolases	2.31767	up	0.000385397	4.63213e-05		2.55513	up	3.57274e-05	3.85444e-06	0.907068	F:heme binding; F:monooxygenase activity; F:electron carrier activity	IPR001128; IPR002403; IPR017972; PTHR24292 (PANTHER)	cytochrome P450 [Source:VB External Description;Acc:AAEL003748]
AAEL015442-RA	zinc finger protein 25	2.31767	up	0.0003619	4.01717e-05		2.46089	up	2.05048e-05	1.36008e-06	0.941803	-	PTHR13287 (PANTHER)	conserved hypothetical protein [Source:VB External Description;Acc:AAEL008250]
AAEL000456-RA	isoform a	2.31765	up	0.000515367	8.10115e-05		2.30862	up	2.06207e-06	1.35625e-09	1.00391	P:heme biosynthetic process; F:alanine-tRNA ligase activity; P:alanyl-tRNA aminoacylation; F:5-aminolevulinate synthase activity; F:transferase activity, transferring nitrogenous groups; C:mitochondrial matrix; F:pyridoxal phosphate binding	seg (SEG)	5-aminolevulinic acid synthase [Source:VB External Description;Acc:AAEL007787]
AAEL010116-RC	calcium-binding atopy-related autoantigen 1	2.31526	up	0.000227729	1.30019e-05		2.0086	up	2.19544e-05	1.55331e-06	1.15267	-	no IPS match	conserved hypothetical protein [Source:VB External Description;Acc:AAEL006964]
AAEL002797-RA	mitochondrial nadh-ubiquinone oxidoreductase 9 kda subunit-like protein	2.3088	up	0.00101898	0.000254422		2.12261	up	0.000127455	2.8347e-05	1.08772	-	IPR008862; PTHR12832:SF7 (PANTHER)	testis-specific protein pbs13 (t-complex 11 ) [Source:VB External Description;Acc:AAEL001446]
AAEL000564-RA	myotubularin-related protein 3	2.30605	up	0.00233164	0.000845583		2.31522	up	3.97869e-05	4.61488e-06	0.996039	P:ubiquitin-dependent protein catabolic process; P:regulation of synaptic transmission; P:regulation of cell cycle; C:cullin-RING ubiquitin ligase complex; F:ubiquitin protein ligase binding; P:negative regulation of synaptic growth at neuromuscular junction; C:anaphase-promoting complex	IPR001373; IPR011991; IPR014786; IPR016158; G3DSA:1.20.1310.10 (GENE3D), G3DSA:4.10.1030.10 (GENE3D), PTHR11932 (PANTHER), PTHR11932:SF5 (PANTHER), SSF46785 (SUPERFAMILY)	anaphase-promoting complex subunit [Source:VB External Description;Acc:AAEL001756]
AAEL006189-RA	cg8814 cg8814-pa	2.30322	up	0.00139241	0.000408751		2.6042	up	6.10036e-05	9.21798e-06	0.884424	-	IPR005240; PTHR20992 (PANTHER), PTHR20992:SF9 (PANTHER)	conserved hypothetical protein [Source:VB External Description;Acc:AAEL001495]
AAEL003845-RA	ets domain-containing protein	2.30305	up	0.000857622	0.000194416		2.33643	up	2.03846e-05	1.31862e-06	0.985713	C:cytoplasm; F:aminoacyl-tRNA ligase activity; P:tRNA aminoacylation for protein translation; P:intracellular transport	no IPS match	conserved hypothetical protein [Source:VB External Description;Acc:AAEL001032]
AAEL000567-RA	sugar transporter	2.30243	up	0.000624213	0.000114819		2.11647	up	0.000235897	6.50618e-05	1.08786		IPR009060; IPR009543; IPR015940; G3DSA:1.10.8.10 (GENE3D), PTHR16166 (PANTHER), PTHR16166:SF23 (PANTHER), PF12624 (PFAM)	vacuolar protein sorting-associated protein (vps13d) [Source:VB External Description;Acc:AAEL007551]
AAEL012401-RA	short-chain dehydrogenase	2.30082	up	0.000398158	4.94727e-05		2.24925	up	5.57696e-05	7.87467e-06	1.02293	-	no IPS match	conserved hypothetical protein [Source:VB External Description;Acc:AAEL005340]
AAEL014842-RA	multiple inositol polyphosphate phosphatase	2.29981	up	0.000987954	0.000242207		2.18689	up	3.68521e-05	4.10658e-06	1.05164	F:heme binding; P:oxidation reduction; F:monooxygenase activity; F:electron carrier activity	IPR001128; IPR002401; IPR017972; PTHR24292 (PANTHER), PTHR24292:SF175 (PANTHER)	cytochrome P450 [Source:VB External Description;Acc:AAEL002633]
AAEL014019-RA	cytochrome p450	2.29808	up	0.00102863	0.0002575		4.43788	up	0.000103534	2.08507e-05	0.517833	F:DNA helicase activity; P:DNA recombination; P:auxin biosynthetic process; F:DNA strand annealing activity; F:ATP-dependent helicase activity; F:ATP binding; F:protein binding; P:DNA strand renaturation	IPR001650; IPR004589; IPR011545; IPR014001; G3DSA:3.40.50.300 (GENE3D), PTHR13710:SF12 (PANTHER), SSF52540 (SUPERFAMILY)	DNA helicase recq1 [Source:VB External Description;Acc:AAEL007256]
AAEL012605-RB	isoform c	2.29525	up	0.000417763	5.45109e-05		2.1466	up	7.84377e-05	1.34875e-05	1.06925	F:hydrolase activity; F:poly(A)-specific ribonuclease activity	no IPS match	nocturnin [Source:VB External Description;Acc:AAEL001419]
AAEL011022-RA	cysteine-rich protein	2.2948	up	0.000283767	2.33981e-05		2.42482	up	0.000129126	2.9039e-05	0.946379	F:sequence-specific DNA binding; F:transcription factor activity; C:nucleus; P:regulation of transcription, DNA-dependent	IPR000253; IPR001766; IPR008984; IPR011991; IPR018122; PTHR11829 (PANTHER), PTHR11829:SF50 (PANTHER), SSF46785 (SUPERFAMILY)	hypothetical protein [Source:VB External Description;Acc:AAEL010565]
AAEL006390-RA	vacuolar proton atpases	2.29228	up	0.000417584	5.43534e-05		2.54625	up	1.98129e-05	1.25411e-06	0.900257	P:transmembrane transport; P:regulation of female receptivity; P:endosome to lysosome transport; P:larval central nervous system remodeling; P:peripheral nervous system development; P:locomotion; P:regulation of synaptic growth at neuromuscular junction; P:regulation of nurse cell apoptosis; P:synaptic vesicle endocytosis; P:courtship behavior; C:plasma membrane	IPR011701; IPR016196; IPR020846; G3DSA:1.20.1250.20 (GENE3D), PTHR24001 (PANTHER)	POSSIBLE INTEGRAL MEMBRANE EFFLUX PROTEIN EFPA, putative [Source:VB External Description;Acc:AAEL008351]
AAEL010929-RA	g-protein coupled receptor	2.28854	up	0.00402876	0.00175179		2.89195	up	0.00597429	0.00351328	0.79135	P:auxin biosynthetic process; P:protein amino acid phosphorylation; C:integral to plasma membrane; P:homophilic cell adhesion; P:calcium-dependent cell-cell adhesion; F:transmembrane receptor protein tyrosine kinase activity; F:protein binding; F:calcium ion binding; F:ATP binding	IPR000719; IPR001245; IPR002126; IPR008266; IPR011009; IPR015919; IPR017441; IPR020635; G3DSA:1.10.510.10 (GENE3D), G3DSA:3.30.200.20 (GENE3D), PTHR24416 (PANTHER), PTHR24416:SF223 (PANTHER)	tyrosine kinase receptor [Source:VB External Description;Acc:AAEL000850]
AAEL008351-RB	possible integral membrane efflux protein	2.28566	up	0.00304697	0.00123118		2.7766	up	0.000338444	0.000107242	0.823185	F:DNA-directed RNA polymerase activity; F:transcription regulator activity; F:zinc ion binding; F:nucleic acid binding; C:DNA-directed RNA polymerase I complex; P:regulation of transcription; P:transcription from RNA polymerase I promoter	IPR001222; IPR012164; IPR019761; G3DSA:2.20.25.10 (GENE3D), PTHR11239 (PANTHER), PTHR11239:SF3 (PANTHER), SSF57783 (SUPERFAMILY)	DNA-directed RNA polymerase I, 12kD-subunit, putative [Source:VB External Description;Acc:AAEL010468]
AAEL007072-RA	transmembrane protein 179	2.28359	up	0.000722704	0.00014714		2.07919	up	0.000109692	2.28392e-05	1.09831	-	seg (SEG), SignalP-NN(euk) (SIGNALP)	conserved hypothetical protein [Source:VB External Description;Acc:AAEL004809]
AAEL008638-RA	cytochrome p450	2.27779	up	0.000577148	0.000100481		2.61018	up	0.00565544	0.00330252	0.872659	-	IPR011021; IPR011022; IPR014756; PTHR11188 (PANTHER), PTHR11188:SF13 (PANTHER)	conserved hypothetical protein [Source:VB External Description;Acc:AAEL008173]
AAEL010116-RB	calcium-binding atopy-related autoantigen 1	2.27698	up	0.000237919	1.39961e-05		2.08692	up	2.59056e-06	9.49165e-09	1.09107	P:transmembrane transport; C:integral to membrane; F:transporter activity	no IPS match	glucose transport protein, putative [Source:VB External Description;Acc:AAEL002292]
AAEL001365-RA	glucosyl glucuronosyl transferases	2.27273	up	0.00161512	0.000507173		2.24616	up	0.000651684	0.000248409	1.01183	-	no IPS match	conserved hypothetical protein [Source:VB External Description;Acc:AAEL001511]
AAEL003137-RA	sp1173 cg10121-pb	2.27129	up	0.000301821	2.66356e-05		2.02602	up	0.000101015	1.99733e-05	1.12106	P:mitochondrial electron transport, NADH to ubiquinone; F:NADH dehydrogenase (ubiquinone) activity	seg (SEG)	NADH:ubiquinone dehydrogenase, putative [Source:VB External Description;Acc:AAEL014889]
AAEL004009-RA	glucose dehydrogenase	2.27091	up	0.000112781	1.07766e-06		3.35656	up	0.00208312	0.001023	0.676558	P:nucleotide catabolic process; F:metal ion binding; F:hydrolase activity, acting on ester bonds; F:nucleotide binding	IPR006179; G3DSA:3.60.21.10 (GENE3D)	conserved hypothetical protein [Source:VB External Description;Acc:AAEL012382]
AAEL000856-RA	germ cell-less	2.27058	up	0.00024892	1.65882e-05		2.70537	up	1.40228e-05	6.34259e-07	0.839288	P:signal transduction; P:innate immune response; C:intrinsic to membrane; F:binding; F:transmembrane receptor activity	IPR000157; IPR001660; IPR010993; IPR011510; IPR011989; IPR013761; IPR016024; G3DSA:3.40.50.10140 (GENE3D), PTHR22998 (PANTHER)	sarm1 [Source:VB External Description;Acc:AAEL014931]
AAEL009368-RA	lipoic acid synthetase	2.26907	up	0.00031453	2.92102e-05		2.03132	up	3.97869e-05	4.61779e-06	1.11704	C:integral to membrane; F:ion channel activity; P:ion transport; P:transmembrane transport	no IPS match	cyclic-nucleotide-gated cation channel [Source:VB External Description;Acc:AAEL011638]
AAEL012073-RA	nad dehydrogenase	2.26795	up	0.00267826	0.00102313		2.59605	up	0.000693558	0.00026796	0.873615	-	SignalP-NN(euk) (SIGNALP)	hypothetical protein [Source:VB External Description;Acc:AAEL003316]
AAEL000294-RA	hypothetical protein AaeL_AAEL000294 [Aedes aegypti]	2.26526	up	0.00200785	0.000686094		3.19149	up	0.000122725	2.67003e-05	0.709783	F:molecular_function; C:cellular_component	SignalP-NN(euk) (SIGNALP)	conserved hypothetical protein [Source:VB External Description;Acc:AAEL007834]
AAEL006752-RA	misexpression suppressor of	2.26368	up	0.00228035	0.000819614		2.2885	up	0.00220584	0.00109275	0.989153	C:nucleus; C:cytoplasm; F:transcription repressor activity	seg (SEG)	conserved hypothetical protein [Source:VB External Description;Acc:AAEL002716]
AAEL006538-RC	peroxisomal membrane protein pxmp2	2.25948	up	0.00174822	0.000566533		2.70384	up	0.00113826	0.000491687	0.835657	P:cellular iron ion homeostasis; F:oxidoreductase activity; F:ferric iron binding; P:oxidation reduction; P:iron ion transport	IPR001519; IPR008331; IPR009040; IPR009078; IPR012347; PTHR11431:SF2 (PANTHER)	secreted ferritin G subunit precursor, putative [Source:VB External Description;Acc:AAEL007383]
AAEL005460-RA	alpha-galactosidase alpha-n-acetylgalactosaminidase	2.25852	up	0.00496598	0.00229255		2.98564	up	0.000618438	0.000232686	0.75646	-	tmhmm (TMHMM)	hypothetical protein [Source:VB External Description;Acc:AAEL011119]
AAEL003078-RA	isoform c	2.25753	up	0.00114162	0.000302121		2.05633	up	0.000109619	2.26941e-05	1.09784	P:transmembrane transport; C:integral to membrane; F:binding	no IPS match	mitochondrial ornithine transporter [Source:VB External Description;Acc:AAEL008096]
AAEL001013-RA	transmembrane protein 179	2.25741	up	0.000325318	3.2571e-05		2.17564	up	9.95403e-05	1.95937e-05	1.03759	P:catecholamine metabolic process; P:histidine catabolic process; F:dopamine beta-monooxygenase activity	IPR019545; PTHR24036 (PANTHER), PTHR24036:SF221 (PANTHER)	conserved hypothetical protein [Source:VB External Description;Acc:AAEL005251]
AAEL010123-RA	equilibrative nucleoside transporter	2.25363	up	0.000153064	4.16368e-06		2.66738	up	0.000241258	6.72849e-05	0.844886	F:peptidase activity; P:proteolysis	IPR007484; G3DSA:3.40.630.10 (GENE3D), PTHR12147 (PANTHER), PTHR12147:SF6 (PANTHER), SSF53187 (SUPERFAMILY)	conserved hypothetical protein [Source:VB External Description;Acc:AAEL012153]
AAEL001642-RA	6-pyruvoyl tetrahydrobiopterin synthase	2.25257	up	0.000661745	0.000127533		2.4462	up	8.00413e-05	1.39029e-05	0.920845	F:actin binding; P:heart development	IPR000533; G3DSA:1.20.5.340 (GENE3D), PTHR19269 (PANTHER), PTHR19269:SF11 (PANTHER)	tropomyosin invertebrate [Source:VB External Description;Acc:AAEL002759]
AAEL007383-RA	secreted ferritin g subunit	2.25141	up	0.000267848	2.10025e-05		2.20951	up	0.000338191	0.000107041	1.01896	F:zinc ion binding; F:nucleic acid binding; C:intracellular; F:heat shock protein binding	IPR001623; IPR003095; IPR003604; IPR007087; IPR015880; IPR022755; PTHR24078 (PANTHER), PTHR24078:SF10 (PANTHER), SSF57667 (SUPERFAMILY)	conserved hypothetical protein [Source:VB External Description;Acc:AAEL006437]
AAEL009544-RA	hypothetical protein AaeL_AAEL009544 [Aedes aegypti]	2.25011	up	0.00101714	0.000253227		2.09869	up	0.00056865	0.000209139	1.07215	C:flagellum	seg (SEG), SignalP-NN(euk) (SIGNALP), tmhmm (TMHMM)	SspC, putative [Source:VB External Description;Acc:AAEL012228]
AAEL001642-RB	6-pyruvoyl tetrahydrobiopterin synthase	2.24785	up	0.00102224	0.000255622		2.3585	up	2.03548e-05	1.31413e-06	0.953085	P:axon guidance; P:cuticle pigmentation; F:beta-alanyl-dopamine hydrolase activity; P:embryonic development ending in birth or egg hatching; P:central nervous system development; P:pronuclear migration; P:heart development; C:tubulin complex; P:mitotic spindle organization; P:mitotic cell cycle spindle assembly checkpoint; P:embryonic cleavage; F:SUMO binding; P:penicillin biosynthetic process; F…	IPR005079	conserved hypothetical protein [Source:VB External Description;Acc:AAEL002457]
AAEL012153-RA	isoform b	2.24609	up	7.36179e-05	2.91663e-07		2.38429	up	2.29468e-05	1.7221e-06	0.942038	-	IPR004119; IPR011009; IPR015897; G3DSA:3.90.1200.10 (GENE3D), PTHR11012 (PANTHER)	juvenile hormone-inducible protein, putative [Source:VB External Description;Acc:AAEL006600]
AAEL004646-RA	actin	2.2431	up	0.000493893	7.50153e-05		3.03503	up	6.19581e-06	1.01346e-07	0.73907	C:membrane; P:immune response; F:tumor necrosis factor receptor binding	seg (SEG), SignalP-NN(euk) (SIGNALP)	hypothetical protein [Source:VB External Description;Acc:AAEL010524]
AAEL000415-RA	amp dependent coa ligase	2.24272	up	0.00567488	0.00270464		2.29583	up	0.00181606	0.000871288	0.976866	P:phosphate transport; F:high affinity inorganic phosphate:sodium symporter activity; P:transmembrane transport; F:inorganic phosphate transmembrane transporter activity; C:integral to membrane; P:sodium ion transport	IPR011701; IPR016196; IPR020846; G3DSA:1.20.1250.20 (GENE3D), PTHR11662 (PANTHER), PTHR11662:SF30 (PANTHER)	inorganic phosphate cotransporter, putative [Source:VB External Description;Acc:AAEL001113]
AAEL009045-RA	amine oxidase	2.24227	up	0.000949714	0.000229574		2.11423	up	0.000116703	2.49183e-05	1.06056	F:odorant binding; P:transport	IPR006170; IPR006625; IPR023316; PTHR11857 (PANTHER), PTHR11857:SF3 (PANTHER)	odorant-binding protein 56a, putative [Source:VB External Description;Acc:AAEL007603]
AAEL002278-RA	guanylate cyclase	2.24069	up	0.00286698	0.00113286		2.17914	up	0.00168495	0.000795321	1.02825	F:substrate-specific transmembrane transporter activity; C:integral to membrane; P:transmembrane transport; P:carbohydrate transport	IPR003663; IPR005828; IPR016196; IPR020846; G3DSA:1.20.1250.20 (GENE3D), PTHR24063 (PANTHER), PTHR24063:SF13 (PANTHER)	sugar transporter [Source:VB External Description;Acc:AAEL010348]
AAEL012625-RA	serine protease	2.23946	up	0.00535664	0.00251556		2.09023	up	0.00729098	0.00439669	1.0714	F:transferase activity; C:membrane; P:cell differentiation	no IPS match	conserved hypothetical protein [Source:VB External Description;Acc:AAEL007399]
AAEL008006-RA	3-hydroxyacyl-coa dehyrogenase	2.23929	up	0.000170386	5.96967e-06		2.69293	up	7.65432e-06	1.54505e-07	0.831545	-	seg (SEG)	conserved hypothetical protein [Source:VB External Description;Acc:AAEL004264]
AAEL014931-RB	sterile alpha and tir motif-containing protein 1	2.23634	up	0.00108575	0.000280018		2.3562	up	0.00211153	0.00104042	0.949128	P:regulation of membrane potential; P:potassium ion transport; C:integral to membrane; F:G-protein activated inward rectifier potassium channel activity	no IPS match	inwardly rectifying k+ channel, [Source:VB External Description;Acc:AAEL008928]
AAEL004521-RA	ly-6 neurotoxin superfamily member 1	2.23269	up	0.00406275	0.00176905		2.35714	up	0.00103526	0.000438324	0.9472	P:metabolic process; F:sulfuric ester hydrolase activity	seg (SEG)	arylsulfatase b [Source:VB External Description;Acc:AAEL005134]
AAEL010224-RA	transcription factor gata-4 (gata binding factor-4)	2.2325	up	0.00238731	0.000877181		2.60464	up	0.000145512	3.42685e-05	0.857126	F:heme binding; C:membrane; P:oxidation reduction; F:monooxygenase activity; C:mitochondrion; F:electron carrier activity	IPR001128; IPR002403; IPR017972; PTHR24305 (PANTHER), PTHR24305:SF95 (PANTHER)	cytochrome P450 [Source:VB External Description;Acc:AAEL008638]
AAEL008304-RA	hypothetical protein AaeL_AAEL008304 [Aedes aegypti]	2.23119	up	0.000715206	0.000144671		2.16495	up	0.00271782	0.00139892	1.0306	-	IPR003534; IPR011042; IPR017996	dopachrome-conversion enzyme (DCE) isoenzyme, putative [Source:VB External Description;Acc:AAEL005325]
AAEL007383-RD	secreted ferritin g subunit	2.23106	up	0.000264655	2.04279e-05		2.1931	up	0.000560489	0.000204793	1.01731	-	IPR004942; G3DSA:3.30.450.30 (GENE3D), PTHR13323 (PANTHER), SSF103196 (SUPERFAMILY)	late endosomal/lysosomal MP1 interacting protein, putative [Source:VB External Description;Acc:AAEL010572]
AAEL007833-RA	hypothetical protein AaeL_AAEL007833 [Aedes aegypti]	2.22471	up	0.00114011	0.000301202		2.29701	up	0.000599145	0.000223198	0.968526	-	IPR004119; IPR011009; IPR015897; G3DSA:3.90.1200.10 (GENE3D), PTHR11012 (PANTHER)	juvenile hormone-inducible protein, putative [Source:VB External Description;Acc:AAEL000515]
AAEL007874-RA	isoform a	2.22439	up	0.000422215	5.52987e-05		2.01506	up	0.000141219	3.29703e-05	1.10388	F:structural constituent of cuticle	IPR000618	conserved hypothetical protein [Source:VB External Description;Acc:AAEL011451]
AAEL008705-RA	proximal to isoform b	2.22183	up	0.00176446	0.000573526		2.41103	up	0.000231347	6.34268e-05	0.921526	F:nucleotidyltransferase activity	seg (SEG), tmhmm (TMHMM)	conserved hypothetical protein [Source:VB External Description;Acc:AAEL012677]
AAEL004264-RA	hypothetical protein AaeL_AAEL004264 [Aedes aegypti]	2.22152	up	0.0011661	0.00031074		2.18476	up	0.000940083	0.000388742	1.01683	F:binding; F:protein transporter activity; P:intracellular protein transport	IPR001494; IPR011989; IPR013598; IPR016024; PTHR21452 (PANTHER), PTHR21452:SF1 (PANTHER)	exportin, putative [Source:VB External Description;Acc:AAEL003789]
AAEL007383-RC	secreted ferritin g subunit	2.21927	up	0.000209343	1.05994e-05		2.20704	up	0.000497886	0.000177105	1.00554	F:hydrogen ion transmembrane transporter activity; C:mitochondrial proton-transporting ATP synthase complex, coupling factor F(o); P:ATP synthesis coupled proton transport; C:lipid particle	IPR008386	conserved hypothetical protein [Source:VB External Description;Acc:AAEL009964]
AAEL006238-RA	hypothetical protein AaeL_AAEL006238 [Aedes aegypti]	2.21582	up	0.00256814	0.000967618		2.49179	up	0.000191101	4.93989e-05	0.88925	C:extracellular region; F:serine-type endopeptidase inhibitor activity	IPR000716; IPR003645; IPR004094; IPR006150; IPR008197; IPR011061; IPR018112; PTHR19441 (PANTHER), PTHR19441:SF8 (PANTHER)	conserved hypothetical protein [Source:VB External Description;Acc:AAEL003092]
AAEL002163-RA	cell cycle control protein 50a	2.21517	up	0.00174822	0.000566436		2.30786	up	2.46447e-05	2.02003e-06	0.95984	P:dephosphorylation; F:protein tyrosine phosphatase activity	IPR000387; IPR016130; G3DSA:3.90.190.10 (GENE3D), PTHR13524 (PANTHER), PTHR13524:SF2 (PANTHER), SSF52799 (SUPERFAMILY)	conserved hypothetical protein [Source:VB External Description;Acc:AAEL002370]
AAEL007383-RB	secreted ferritin g subunit	2.21501	up	0.000345696	3.71129e-05		2.22673	up	0.000465846	0.000163326	0.994737	-	no IPS match	hypothetical protein [Source:VB External Description;Acc:AAEL006962]
AAEL012513-RA	calcium-binding protein e63-1	2.21219	up	0.00460033	0.00208542		2.07709	up	0.000863686	0.000350057	1.06504	C:intracellular; P:transport; F:transporter activity	IPR001071; IPR001251; IPR011074; G3DSA:1.10.8.20 (GENE3D), PTHR10174 (PANTHER), PTHR10174:SF33 (PANTHER)	CRAL/TRIO domain-containing protein [Source:VB External Description;Acc:AAEL005779]
AAEL013112-RA	cg8995	2.21073	up	0.000936929	0.000225192		2.47626	up	2.26794e-05	1.66478e-06	0.892771	-	seg (SEG)	conserved hypothetical protein [Source:VB External Description;Acc:AAEL001692]
AAEL012290-RA	ankyrin repeat and lem domain-containing protein 2	2.20851	up	0.001693	0.00054034		2.24701	up	0.000333588	0.000105002	0.982868	F:zinc ion binding; P:regulation of transcription, DNA-dependent; F:sequence-specific DNA binding; F:transcription activator activity; F:transcription factor activity; C:nucleus; P:positive regulation of transcription	IPR000679; IPR013088; PTHR10071 (PANTHER), SSF57716 (SUPERFAMILY)	transcription factor GATA-4 (GATA binding factor-4) [Source:VB External Description;Acc:AAEL010222]
AAEL003428-RA	regulator of microtubule dynamics protein 1-like	2.20826	up	0.000322283	3.15096e-05		2.56069	up	7.93048e-06	1.99715e-07	0.862369	-	IPR005398	conserved hypothetical protein [Source:VB External Description;Acc:AAEL012605]
AAEL010468-RB	dna-directed rna polymerase 12kd-	2.20737	up	0.00101898	0.000254281		2.37129	up	0.0086056	0.00530144	0.930874	F:oxidoreductase activity; P:oxidation reduction; F:binding	IPR002198; IPR002347; IPR016040; PIRSF000126 (PIR), PTHR24316 (PANTHER), PTHR24316:SF38 (PANTHER), SSF51735 (SUPERFAMILY)	steroid dehydrogenase [Source:VB External Description;Acc:AAEL009634]
AAEL009020-RA	glutathione-s-transferase gst	2.20357	up	0.000412127	5.30685e-05		2.36206	up	1.82566e-05	1.07004e-06	0.932902	F:hydrolase activity	IPR000086; IPR015797; IPR020476; PTHR22769 (PANTHER)	7,8-dihydro-8-oxoguanine-triphosphatase, putative [Source:VB External Description;Acc:AAEL007364]
AAEL010302-RA	zinc finger protein 614	2.20173	up	0.000346132	3.73223e-05		2.19369	up	0.000634364	0.00023996	1.00367	-	IPR001810; IPR011046; IPR015943; IPR022364; G3DSA:1.20.1280.50 (GENE3D), PTHR14381 (PANTHER)	conserved hypothetical protein [Source:VB External Description;Acc:AAEL011561]
AAEL005423-RA	btb poz domain-containing protein kctd3	2.19584	up	0.000183273	7.62941e-06		2.19258	up	7.07533e-05	1.1589e-05	1.00148	P:phospholipid efflux; P:response to oxidative stress; P:daunorubicin transport; P:xenobiotic transport; P:plasma membrane long-chain fatty acid transport; P:auxin biosynthetic process; F:sphingolipid transporter activity; P:cell chemotaxis; F:long-chain fatty acid transporter activity; F:xenobiotic-transporting ATPase activity; P:drug transmembrane transport; P:glutathione transmembrane transpor…	IPR001140; IPR003439; IPR003593; IPR005292; IPR011527; IPR017871; IPR017940; G3DSA:1.20.1560.10 (GENE3D), G3DSA:3.40.50.300 (GENE3D), PTHR24223 (PANTHER), PTHR24223:SF137 (PANTHER), SSF52540 (SUPERFAMILY)	ATP-dependent bile acid permease [Source:VB External Description;Acc:AAEL005043]
AAEL000581-RA	hypothetical protein AaeL_AAEL000581 [Aedes aegypti]	2.19571	up	0.00417611	0.00183296		2.43745	up	0.000105376	2.14348e-05	0.900826	-	IPR007241; PTHR13038:SF11 (PANTHER)	autophagy-specific protein, putative [Source:VB External Description;Acc:AAEL009105]
AAEL000639-RA	n-acetyl galactosaminyl transferase 6	2.19133	up	0.00261846	0.000990528		2.32116	up	6.13447e-05	9.29277e-06	0.944067	C:lysosomal membrane; C:lysosome; C:integral to membrane; C:membrane	seg (SEG)	conserved hypothetical protein [Source:VB External Description;Acc:AAEL000055]
AAEL012402-RA	elongation of very long chain fatty acids protein aael008004	2.19018	up	0.0019594	0.000663535		2.60297	up	2.08323e-05	1.41075e-06	0.841415	F:serine-type endopeptidase activity; P:proteolysis	IPR001254; IPR009003; G3DSA:2.40.10.10 (GENE3D), PTHR24260 (PANTHER), PTHR24260:SF174 (PANTHER), SignalP-NN(euk) (SIGNALP)	serine protease snake, putative [Source:VB External Description;Acc:AAEL012625]
AAEL002796-RA	l-asparaginase i	2.18962	up	0.00218562	0.000774954		2.50843	up	0.000208342	5.54352e-05	0.872903	F:zinc ion binding; F:protein binding	IPR001841; IPR013083; IPR017907; IPR018957; PTHR12983 (PANTHER), PTHR12983:SF5 (PANTHER), SSF57850 (SUPERFAMILY)	conserved hypothetical protein [Source:VB External Description;Acc:AAEL008854]
AAEL014678-RA	cytochrome p450 CYP6F2	2.1887	up	0.00272967	0.00105214		2.22958	up	8.14422e-05	1.43643e-05	0.981665	P:dephosphorylation; F:protein tyrosine phosphatase activity	IPR000387; IPR016130; G3DSA:3.90.190.10 (GENE3D), PTHR13524 (PANTHER), PTHR13524:SF2 (PANTHER), SSF52799 (SUPERFAMILY)	conserved hypothetical protein [Source:VB External Description;Acc:AAEL002370]
AAEL014140-RA	serine protease	2.18439	up	0.000986282	0.000241305		2.14609	up	0.00116067	0.000505327	1.01784	F:serine-type endopeptidase activity; P:proteolysis	IPR001254; IPR001314; IPR006604; IPR009003; IPR018114; IPR022700; G3DSA:2.40.10.10 (GENE3D), PTHR24260 (PANTHER), PTHR24260:SF176 (PANTHER)	Clip-domain serine protease, family B [Source:VB External Description;Acc:AAEL000028]
AAEL014663-RA	amp dependent coa ligase	2.18409	up	0.00246069	0.000916202		2.62926	up	0.000241258	6.71807e-05	0.830686	-	no IPS match	conserved hypothetical protein [Source:VB External Description;Acc:AAEL006238]
AAEL009303-RA	regulator of chromosome condensation	2.18378	up	0.000431106	5.78365e-05		2.14472	up	1.95656e-05	1.21829e-06	1.01821	P:protein amino acid phosphorylation; F:protein binding; F:protein tyrosine kinase activity; F:ATP binding; F:protein serine/threonine kinase activity	IPR000687; IPR011009; IPR017406; IPR018934; PTHR10593 (PANTHER), PTHR10593:SF6 (PANTHER)	serine/threonine-protein kinase rio3 (rio kinase 3) [Source:VB External Description;Acc:AAEL009424]
AAEL007607-RA	transmembrane protein 135	2.18362	up	7.36179e-05	1.55476e-07		2.12892	up	0.000171891	4.27392e-05	1.02569	C:integral to membrane	PTHR12459 (PANTHER)	conserved hypothetical protein [Source:VB External Description;Acc:AAEL015014]
AAEL010416-RA	hypothetical protein AaeL_AAEL010416 [Aedes aegypti]	2.18195	up	0.00190949	0.000642423		2.27147	up	4.97202e-05	6.56444e-06	0.960592	F:hydrolase activity; P:metabolic process	G3DSA:3.40.50.1820 (GENE3D), PTHR11559 (PANTHER), PTHR11559:SF25 (PANTHER), SSF53474 (SUPERFAMILY)	hypothetical protein [Source:VB External Description;Acc:AAEL005199]
AAEL015218-RA	#NAME?	2.17948	up	0.00913761	0.00486884		2.24313	up	0.000104728	2.12103e-05	0.971626	P:carbohydrate metabolic process; F:cation binding; P:sphingolipid metabolic process; C:lysosome; F:glucosylceramidase activity; P:lysosome organization	IPR001139; IPR013780; IPR013781; IPR017853; PTHR11069:SF2 (PANTHER), SSF51011 (SUPERFAMILY)	glucosylceramidase [Source:VB External Description;Acc:AAEL014321]
AAEL006873-RA	hypothetical protein AaeL_AAEL006873 [Aedes aegypti]	2.17647	up	0.00957434	0.00516724		2.0653	up	0.00275687	0.00142145	1.05383	F:nucleic acid binding; C:nucleus; F:zinc ion binding	IPR007087; IPR012934; IPR013087; IPR015880; PTHR24377 (PANTHER), PTHR24377:SF381 (PANTHER), PF12874 (PFAM), SSF57667 (SUPERFAMILY), SSF57716 (SUPERFAMILY)	zinc finger protein [Source:VB External Description;Acc:AAEL011354]
AAEL012596-RA	sodium chloride dependent transporter	2.17321	up	0.000640574	0.000119529		2.09794	up	0.000127751	2.84556e-05	1.03588	P:metal ion transport; C:membrane; F:metal ion transmembrane transporter activity; P:transmembrane transport	IPR003689; PTHR11040 (PANTHER), PTHR11040:SF4 (PANTHER)	zinc/iron transporter [Source:VB External Description;Acc:AAEL005496]
AAEL007062-RA	sorting nexin 14	2.16751	up	0.000462077	6.70301e-05		2.27541	up	3.17144e-05	3.08529e-06	0.95258	P:metabolic process; F:sulfuric ester hydrolase activity	IPR000917; IPR017849; IPR017850; G3DSA:3.30.1120.10 (GENE3D), PTHR10342 (PANTHER), PTHR10342:SF19 (PANTHER)	arylsulfatase b [Source:VB External Description;Acc:AAEL005134]
AAEL005707-RA	gonadotropin inducible transcription factor	2.16296	up	0.00351922	0.00147935		2.75896	up	5.06342e-05	6.77093e-06	0.783974	F:catalytic activity; P:metabolic process; F:binding	IPR004262; IPR013120; IPR016040; PTHR11011 (PANTHER), PTHR11011:SF8 (PANTHER), SSF51735 (SUPERFAMILY)	conserved hypothetical protein [Source:VB External Description;Acc:AAEL007296]
AAEL003479-RA	hemolymph protein	2.15971	up	0.00451816	0.00203931		2.80301	up	5.57696e-05	7.89768e-06	0.770499	-	no IPS match	hypothetical protein [Source:VB External Description;Acc:AAEL011120]
AAEL005602-RA	btb poz domain-containing protein 3	2.15923	up	0.00388696	0.00167822		2.09151	up	0.00956085	0.00598172	1.03238	-	no IPS match	hypothetical protein [Source:VB External Description;Acc:AAEL006904]
AAEL009243-RA	glycoside hydrolases	2.15826	up	0.00651132	0.00319753		3.36416	up	7.65432e-06	1.72561e-07	0.641546	-	seg (SEG)	conserved hypothetical protein [Source:VB External Description;Acc:AAEL008912]
AAEL002027-RA	protein serine threonine	2.15794	up	0.00816295	0.00424803		2.82672	up	9.5143e-05	1.82289e-05	0.763409	F:carboxypeptidase activity	no IPS match	conserved hypothetical protein [Source:VB External Description;Acc:AAEL009861]
AAEL008227-RA	short-chain dehydrogenase	2.15743	up	0.000832691	0.000185779		2.50769	up	1.26637e-05	5.27988e-07	0.860322	F:hydrogen-exporting ATPase activity, phosphorylative mechanism; P:ATP synthesis coupled proton transport; C:vacuolar proton-transporting V-type ATPase, V0 domain	IPR002490; PTHR11629:SF24 (PANTHER)	vacuolar proton ATPases [Source:VB External Description;Acc:AAEL006390]
AAEL000850-RA	tyrosine kinase receptor	2.15713	up	0.000876616	0.000200979		2.29999	up	0.00161995	0.000756044	0.937886	P:neuropeptide signaling pathway; P:tachykinin receptor signaling pathway; P:behavior; C:extracellular space; F:neurotransmitter transporter activity; C:extracellular region	no IPS match	hypothetical protein [Source:VB External Description;Acc:AAEL006644]
AAEL000040-RA	fed tick salivary protein 10	2.15599	up	0.00292512	0.00116435		2.42303	up	6.96258e-05	1.13301e-05	0.88979	F:zinc ion binding	IPR001594; PTHR22883 (PANTHER)	conserved hypothetical protein [Source:VB External Description;Acc:AAEL015466]
AAEL006284-RA	hypothetical protein AaeL_AAEL006284 [Aedes aegypti]	2.15045	up	0.00551635	0.00261151		2.25016	up	0.000561609	0.000205344	0.955685	C:integral to membrane	IPR002076; PTHR11157:SF4 (PANTHER)	elongase, putative [Source:VB External Description;Acc:AAEL014190]
AAEL001495-RA	hypothetical protein AaeL_AAEL001495 [Aedes aegypti]	2.15014	up	0.000187885	8.41634e-06		2.34393	up	0.000157766	3.79745e-05	0.917319	P:signaling pathway; F:protein binding	IPR001849; IPR011993; PTHR12156 (PANTHER), PTHR12156:SF1 (PANTHER), SSF50729 (SUPERFAMILY)	grb2-associated binder, gab [Source:VB External Description;Acc:AAEL008677]
AAEL007296-RA	fatty acyl- reductase 1	2.1496	up	0.000303339	2.69707e-05		2.1695	up	0.000156137	3.75005e-05	0.990826	C:extracellular region; F:chitin binding; P:chitin metabolic process	IPR002557	hypothetical protein [Source:VB External Description;Acc:AAEL013812]
AAEL006538-RA	peroxisomal membrane protein pxmp2	2.14717	up	0.00202174	0.000694556		2.60524	up	0.00131459	0.000590279	0.824172	-	IPR002110; IPR020683; PTHR20976 (PANTHER), PF12796 (PFAM)	hypothetical protein [Source:VB External Description;Acc:AAEL012290]
AAEL002665-RA	matrix metalloproteinase	2.14588	up	0.00311867	0.0012738		2.08512	up	8.42948e-05	1.52237e-05	1.02914	F:heme binding; P:oxidation reduction; F:monooxygenase activity; F:electron carrier activity	IPR001128; IPR002401; IPR017972; PTHR24292 (PANTHER)	cytochrome P450 [Source:VB External Description;Acc:AAEL006989]
AAEL000795-RA	ubiquitin c	2.14582	up	0.00494201	0.00227785		2.21527	up	0.000634356	0.00023974	0.96865	P:tetrahydrofolate biosynthetic process; P:compound eye pigmentation; F:GTP cyclohydrolase I activity; P:embryonic pattern specification; P:tetrahydrobiopterin biosynthetic process; P:pteridine biosynthetic process; P:cuticle pigmentation; P:one-carbon metabolic process; P:preblastoderm mitotic cell cycle; P:larval chitin-based cuticle development; C:cytoplasm	seg (SEG), SignalP-NN(euk) (SIGNALP)	GTP cyclohydrolase i [Source:VB External Description;Acc:AAEL002261]
AAEL011315-RA	hypothetical protein AaeL_AAEL011315 [Aedes aegypti]	2.14545	up	0.000287612	2.41801e-05		2.21816	up	1.99309e-05	1.27165e-06	0.967218	F:DNA binding	IPR004210; IPR006578; PTHR12243 (PANTHER)	conserved hypothetical protein [Source:VB External Description;Acc:AAEL001879]
AAEL010836-RA	ribitol kinase	2.14494	up	0.00424525	0.00187817		2.10526	up	0.00105838	0.000450497	1.01885	F:hydrolase activity; P:lipid metabolic process	IPR000734; IPR013818; G3DSA:3.40.50.1820 (GENE3D), PTHR11610:SF43 (PANTHER), SSF53474 (SUPERFAMILY)	lipase [Source:VB External Description;Acc:AAEL006961]
AAEL009026-RA	ubiquitin-conjugating enzyme m	2.14212	up	0.000396363	4.88048e-05		2.00019	up	0.000560239	0.00020463	1.07096	-	seg (SEG)	juvenile hormone-inducible protein, putative [Source:VB External Description;Acc:AAEL006581]
AAEL007785-RA	leucine-rich transmembrane protein	2.1393	up	0.00024892	1.64455e-05		2.57389	up	6.03523e-05	9.08907e-06	0.831154	P:cellular iron ion homeostasis; F:oxidoreductase activity; F:ferric iron binding; P:oxidation reduction; P:iron ion transport	IPR001519; IPR008331; IPR009040; IPR009078; IPR012347; PTHR11431:SF2 (PANTHER)	secreted ferritin G subunit precursor, putative [Source:VB External Description;Acc:AAEL007383]
AAEL011120-RA	hypothetical protein AaeL_AAEL011120 [Aedes aegypti]	2.13565	up	0.00134349	0.000388495		2.47808	up	0.00102408	0.000432274	0.861818	F:zinc ion binding	seg (SEG)	cysteine-rich protein, putative [Source:VB External Description;Acc:AAEL011022]
AAEL001668-RA	enolase	2.13509	up	0.000591933	0.000105666		2.14609	up	3.59609e-05	3.91639e-06	0.994878	F:hydrolase activity; P:nucleotide catabolic process	IPR004843; IPR006179; IPR008334; G3DSA:3.60.21.10 (GENE3D), PTHR11575:SF7 (PANTHER), SSF56300 (SUPERFAMILY)	apyrase, putative [Source:VB External Description;Acc:AAEL000575]
AAEL012076-RA	hypothetical protein AaeL_AAEL012076 [Aedes aegypti]	2.13249	up	0.00244479	0.000906387		2.53299	up	5.72163e-05	8.28426e-06	0.841884	P:actin filament organization; P:regulation of cell shape; P:cell adhesion	PTHR21419 (PANTHER), PTHR21419:SF4 (PANTHER)	guanylate cyclase, putative [Source:VB External Description;Acc:AAEL002278]
AAEL009861-RD	isoform a	2.12989	up	0.000450563	6.38694e-05		2.28898	up	0.000122496	2.66195e-05	0.930499	P:protein amino acid phosphorylation; P:negative regulation of transcription from RNA polymerase II promoter; P:R8 cell fate specification; F:receptor signaling protein serine/threonine kinase activity; F:protein binding; P:negative regulation of organ growth; P:auxin biosynthetic process; P:morphogenesis of an epithelial sheet; P:DNA damage response, signal transduction by p53 class mediator res…	IPR000719; IPR002290; IPR011009; IPR011524; IPR017441; IPR017442; IPR024205; G3DSA:1.10.510.10 (GENE3D), G3DSA:3.30.200.20 (GENE3D), PTHR24361 (PANTHER), PTHR24361:SF88 (PANTHER)	serine/threonine protein kinase [Source:VB External Description;Acc:AAEL006539]
AAEL000924-RA	eukaryotic translation initiation factor 2-alpha kinase	2.12402	up	0.00484596	0.00222111		2.13935	up	0.000509014	0.000181805	0.992837	C:dynactin complex; F:transferase activity	IPR001451; IPR011004; G3DSA:2.160.10.10 (GENE3D), PTHR13072 (PANTHER)	dynactin, p27-subunit, putative [Source:VB External Description;Acc:AAEL013591]
AAEL006538-RB	peroxisomal membrane protein pxmp2	2.12346	up	0.00215957	0.000761748		2.64333	up	0.00172965	0.000821668	0.80333	F:zinc ion binding; F:nucleic acid binding; C:intracellular	seg (SEG)	gonadotropin inducible transcription factor [Source:VB External Description;Acc:AAEL005707]
AAEL011369-RA	endothelin-converting enzyme	2.12326	up	0.00434734	0.00193611		2.5743	up	0.000207967	5.5309e-05	0.824789	F:N-acetylmuramoyl-L-alanine amidase activity; P:positive regulation of innate immune response; P:peptidoglycan catabolic process; F:protein binding; P:signal transduction; C:extracellular region; P:defense response to Gram-positive bacterium; F:peptidoglycan receptor activity	IPR002502; IPR006619; IPR015510; PTHR11022:SF22 (PANTHER)	PeptidoglycanRecognition Protein (Long) [Source:VB External Description;Acc:AAEL013112]
AAEL011119-RA	hypothetical protein AaeL_AAEL011119 [Aedes aegypti]	2.12251	up	0.00469293	0.00213527		2.44828	up	0.000351545	0.00011277	0.866939	C:integral to membrane; F:glucose transmembrane transporter activity; P:transmembrane transport; P:carbohydrate transport	IPR003663; IPR005828; IPR005829; IPR016196; IPR020846; G3DSA:1.20.1250.20 (GENE3D), PTHR24063 (PANTHER), PTHR24063:SF77 (PANTHER)	Facilitated trehalose transporter Tret1 [Source:VB External Description;Acc:AAEL000567]
AAEL008790-RA	atp synthase subunit mitochondrial	2.12203	up	0.00206385	0.000714485		2.36055	up	0.000990531	0.000413983	0.898958	P:transmembrane transport; C:integral to membrane; F:transporter activity	IPR005828; IPR016196; IPR020846; G3DSA:1.20.1250.20 (GENE3D), PTHR24064 (PANTHER), PTHR24064:SF103 (PANTHER), seg (SEG), tmhmm (TMHMM)	mfs transporter [Source:VB External Description;Acc:AAEL003184]
AAEL003039-RA	nonsense-mediated mrna decay protein	2.11784	up	0.000569454	9.78844e-05		2.04637	up	0.000337922	0.00010682	1.03492	F:binding; P:biological_process	no IPS match	conserved hypothetical protein [Source:VB External Description;Acc:AAEL007534]
AAEL010986-RA	5 nucleotidase	2.11687	up	0.00440263	0.00197066		2.07316	up	0.000371849	0.000121632	1.02108	-	PTHR21698 (PANTHER)	hypothetical protein [Source:VB External Description;Acc:AAEL014623]
AAEL007798-RA	cytochrome p450 CYP4K3	2.11602	up	0.00284293	0.00111548		2.13194	up	0.000397502	0.000132283	0.992536	F:hydrolase activity; C:lipid particle	no IPS match	conserved hypothetical protein [Source:VB External Description;Acc:AAEL008664]
AAEL012722-RA	hypothetical protein AaeL_AAEL012722 [Aedes aegypti]	2.11363	up	0.00165608	0.000524539		2.32731	up	0.00232962	0.00116319	0.908184	P:mesoderm development; P:sarcomere organization; F:calcium ion binding; C:troponin complex; P:skeletal muscle thin filament assembly; P:cellular calcium ion homeostasis; P:muscle cell homeostasis; P:mitochondrion organization; F:tropomyosin binding	IPR001978; G3DSA:1.20.5.350 (GENE3D), PTHR11521 (PANTHER)	troponin t, invertebrate [Source:VB External Description;Acc:AAEL002417]
AAEL012556-RA	ofd1 protein	2.10942	up	0.006258	0.00304926		2.05935	up	0.00341854	0.00182999	1.02431	-	no IPS match	hypothetical protein [Source:VB External Description;Acc:AAEL009140]
AAEL013083-RA	fibroblast growth factor receptor-like 1 protein	2.10707	up	0.00116498	0.000310299		2.43304	up	0.000179807	4.57071e-05	0.866024	F:oxidoreductase activity; P:oxidation reduction; F:binding	IPR002198; IPR002347; IPR016040; PTHR24316 (PANTHER), PTHR24316:SF98 (PANTHER), SSF51735 (SUPERFAMILY)	short-chain dehydrogenase [Source:VB External Description;Acc:AAEL012401]
AAEL010524-RA	hypothetical protein AaeL_AAEL010524 [Aedes aegypti]	2.10274	up	0.00246974	0.000922293		2.06536	up	0.00131851	0.000592205	1.0181	C:integral to membrane	no IPS match	conserved hypothetical protein [Source:VB External Description;Acc:AAEL015014]
AAEL010011-RA	zinc finger protein 668	2.10109	up	0.000475275	7.07497e-05		2.20955	up	8.06343e-05	1.40647e-05	0.950909	F:GTP binding; P:eye pigment granule organization; P:olfactory learning; P:eye pigment precursor transport; P:small GTPase mediated signal transduction; F:GTPase activity; P:protein transport	IPR001806; IPR003579; IPR005225; G3DSA:3.40.50.300 (GENE3D), PTHR24073 (PANTHER), PTHR24073:SF264 (PANTHER), PS51419 (PROFILE), SSF52540 (SUPERFAMILY)	rab32 [Source:VB External Description;Acc:AAEL006880]
AAEL004868-RA	hemomucin	2.10064	up	0.000416428	5.39795e-05		2.08698	up	0.000234358	6.44595e-05	1.00654	P:glycolysis; F:2,3-bisphosphoglycerate-dependent phosphoglycerate mutase activity	IPR005952; IPR013078; G3DSA:3.40.50.1240 (GENE3D), SSF53254 (SUPERFAMILY)	phosphoglycerate mutase [Source:VB External Description;Acc:AAEL007495]
AAEL001082-RA	hypothetical protein AaeL_AAEL001082 [Aedes aegypti]	2.10055	up	0.00532853	0.00249779		2.06923	up	0.0044611	0.0025025	1.01513	P:regulation of synapse organization; F:Rho guanyl-nucleotide exchange factor activity; C:intracellular; P:regulation of Rho protein signal transduction	IPR000219; IPR001452; IPR001849; IPR011993; G3DSA:2.30.30.40 (GENE3D), PTHR22826 (PANTHER), PTHR22826:SF16 (PANTHER), SSF50729 (SUPERFAMILY)	pak-interacting exchange factor, beta-pix/cool-1 [Source:VB External Description;Acc:AAEL000719]
AAEL009861-RA	isoform a	2.09868	up	0.000275249	2.20213e-05		2.22167	up	0.000109619	2.27591e-05	0.944642	F:transferase activity, transferring acyl groups other than amino-acyl groups	IPR002656; PTHR11161 (PANTHER)	hypothetical protein [Source:VB External Description;Acc:AAEL015092]
AAEL010974-RA	ataxin 7-like 1	2.09192	up	0.00229424	0.000826119		2.14338	up	0.000723	0.000281984	0.975995	-	PTHR20983 (PANTHER)	conserved hypothetical protein [Source:VB External Description;Acc:AAEL014909]
AAEL008424-RB	sodium shloride dependent amino acid transporter	2.09091	up	0.00361019	0.00152644		2.02106	up	0.00236562	0.00118565	1.03456	-	no IPS match	hypothetical protein [Source:VB External Description;Acc:AAEL005264]
AAEL010452-RA	salivary protein	2.08955	up	0.00311867	0.00127391		3.01162	up	0.0022216	0.0011014	0.693829	C:extracellular region; F:chitin binding; P:chitin metabolic process	seg (SEG), tmhmm (TMHMM)	conserved hypothetical protein [Source:VB External Description;Acc:AAEL010615]
AAEL006714-RA	male-specific lethal 2-like 1	2.08773	up	0.00787914	0.00405348		2.26796	up	0.00087095	0.000353442	0.920533	F:binding; F:oxidoreductase activity; P:oxidation reduction; P:signal transduction; P:regulation of transcription, DNA-dependent	IPR002198; IPR002347; IPR016040; PIRSF000126 (PIR), PTHR24316 (PANTHER), PTHR24316:SF36 (PANTHER), seg (SEG), SSF51735 (SUPERFAMILY)	short-chain dehydrogenase [Source:VB External Description;Acc:AAEL013603]
AAEL008303-RA	calponin transgelin	2.08595	up	0.00451506	0.00203659		2.23698	up	0.000274348	8.10046e-05	0.932481	F:protein binding	IPR000980; IPR011993; IPR013625; PTHR12583 (PANTHER), SSF50729 (SUPERFAMILY), SSF55550 (SUPERFAMILY)	tensin [Source:VB External Description;Acc:AAEL002862]
AAEL012398-RA	hypothetical protein AaeL_AAEL012398 [Aedes aegypti]	2.08253	up	0.00681946	0.00338968		2.2101	up	0.000333588	0.000104998	0.942276	F:serine-type endopeptidase activity; P:proteolysis	IPR001254; IPR001314; IPR009003; IPR018114; G3DSA:2.40.10.10 (GENE3D), PTHR24268 (PANTHER), PTHR24268:SF174 (PANTHER)	serine protease [Source:VB External Description;Acc:AAEL002629]
AAEL013761-RB	cg7197	2.08171	up	0.000777767	0.000167442		2.27996	up	0.000342325	0.000108904	0.913048	C:nucleus; F:zinc ion binding	seg (SEG)	conserved hypothetical protein [Source:VB External Description;Acc:AAEL009727]
AAEL014901-RA	rho gtpase-activating protein 18	2.07878	up	0.000641635	0.000120434		2.33087	up	0.000275413	8.1493e-05	0.89185	F:hydrolase activity; P:carbohydrate metabolic process; F:cation binding	seg (SEG)	alpha-amylase [Source:VB External Description;Acc:AAEL010532]
AAEL007834-RB	cg34034	2.07693	up	0.000170849	6.07034e-06		2.21445	up	1.08978e-05	3.95156e-07	0.937898	F:microtubule binding; C:microtubule associated complex; C:Golgi apparatus; C:fusome; F:actin binding; C:cell cortex; P:cellularization; P:microtubule-based process; C:spindle microtubule	IPR000938; IPR023092; PTHR18916 (PANTHER), PTHR18916:SF28 (PANTHER)	restin (cytoplasmic linker protein-170) (clip-170) [Source:VB External Description;Acc:AAEL013698]
AAEL009861-RB	isoform a	2.0693	up	0.000741829	0.000154237		2.20636	up	9.24849e-05	1.74804e-05	0.937882	F:metal ion binding; F:thiosulfate sulfurtransferase activity; P:Mo-molybdopterin cofactor biosynthetic process; F:Mo-molybdopterin cofactor sulfurase activity; F:ATP binding; F:nucleotidyltransferase activity; C:cytosol; P:tRNA processing	no IPS match	Adenylyltransferase and sulfurtransferase MOCS3 (Molybdenum cofactor synthesis protein 3) [Includes Adenylyltransferase MOCS3(EC 2.7.7.-)(Sulfur carrier protein MOCS2A adenylyltransferase)(EC 2.7.7.n4);Sulfurtransferase MOCS3(EC 2.8.1.-)(Sulfur carr /.../otein MOCS2A sulfurtransferase)(EC 2.8.1.n1)] [Source:VB External Description;Acc:AAEL004607]
AAEL001087-RA	synaptic vesicle protein	2.06579	up	0.00186326	0.000619792		2.4837	up	0.000177344	4.45881e-05	0.831738	P:gastrulation involving germ band extension; C:apical plasma membrane; C:lateral plasma membrane	no IPS match	hypothetical protein [Source:VB External Description;Acc:AAEL008705]
AAEL009861-RC	isoform a	2.06514	up	0.000903719	0.000210484		2.26372	up	0.000103312	2.07407e-05	0.912276	-	no IPS match	conserved hypothetical protein [Source:VB External Description;Acc:AAEL001325]
AAEL010615-RA	hypothetical protein AaeL_AAEL007616 [Aedes aegypti]	2.06369	up	0.00199749	0.000680105		2.14142	up	8.44258e-05	1.52745e-05	0.963702	-	no IPS match	hypothetical protein [Source:VB External Description;Acc:AAEL008395]
AAEL007834-RA	cg34034	2.06279	up	0.000375684	4.32159e-05		2.22643	up	3.97961e-05	4.64078e-06	0.926502	C:membrane; C:cytoplasm; P:proteolysis; F:calcium-dependent cysteine-type endopeptidase activity; F:calcium ion binding; P:protein autoprocessing	IPR000169; IPR001300; IPR002048; IPR011992; IPR018247; IPR018249; IPR022682; IPR022683; IPR022684; G3DSA:2.60.120.380 (GENE3D), G3DSA:3.90.70.10 (GENE3D), PTHR10183 (PANTHER), PTHR10183:SF45 (PANTHER), SSF47473 (SUPERFAMILY), SSF54001 (SUPERFAMILY)	calpain 4, 6, 7, invertebrate [Source:VB External Description;Acc:AAEL003952]
AAEL004579-RA	retinol dehydrogenase 12	2.06075	up	0.00174286	0.000563515		2.25872	up	0.000665267	0.000255012	0.912354	F:oxidoreductase activity; P:oxidation reduction; F:binding	IPR002198; IPR002347; IPR016040; PIRSF000126 (PIR), PTHR24316 (PANTHER), PTHR24316:SF38 (PANTHER), SSF51735 (SUPERFAMILY)	steroid dehydrogenase [Source:VB External Description;Acc:AAEL009634]
AAEL006156-RA	tripartite motif-containing protein 37	2.05929	up	0.00381304	0.0016369		2.29552	up	0.00129702	0.000581244	0.897089		IPR001452; IPR003598; IPR003599; IPR003961; IPR007110; IPR008957; IPR013098; IPR013783; PR00014 (PRINTS), G3DSA:2.30.30.40 (GENE3D), PTHR19900 (PANTHER), PTHR19900:SF1 (PANTHER), SSF48726 (SUPERFAMILY)	myosin light chain kinase [Source:VB External Description;Acc:AAEL005319]
AAEL012382-RA	isoform a	2.05709	up	0.000926671	0.000221166		2.05873	up	0.00315761	0.00166558	0.999201	C:cytoplasm; F:protein binding; C:nuclear chromatin	no IPS match	kelch repeat protein [Source:VB External Description;Acc:AAEL006525]
AAEL005672-RA	adenosine deaminase	2.05697	up	0.00273178	0.00105328		2.65541	up	0.000450011	0.000155898	0.774633	F:kinase activity; F:phosphotransferase activity, alcohol group as acceptor; P:carbohydrate metabolic process	IPR000577; IPR006003; IPR018484; IPR018485; G3DSA:3.30.420.40 (GENE3D), PTHR10196:SF8 (PANTHER), seg (SEG), SSF53067 (SUPERFAMILY)	ribitol kinase [Source:VB External Description;Acc:AAEL010836]
AAEL007375-RC	pyruvate dehydrogenase	2.05538	up	0.00222157	0.000792603		2.54431	up	1.81026e-05	1.02946e-06	0.807835	-	no IPS match	hypothetical protein [Source:VB External Description;Acc:AAEL006873]
AAEL011936-RA	hypothetical protein AaeL_AAEL011936 [Aedes aegypti]	2.0473	up	0.000181331	7.1315e-06		2.16985	up	0.000154674	3.70123e-05	0.943522	P:protein folding; F:peptidyl-prolyl cis-trans isomerase activity; F:binding	seg (SEG), tmhmm (TMHMM)	fk506 binding protein [Source:VB External Description;Acc:AAEL012272]
AAEL002397-RA	hypothetical protein AaeL_AAEL002397 [Aedes aegypti]	2.04311	up	0.0010441	0.000263648		2.03129	up	0.00049726	0.00017679	1.00582	F:oxidoreductase activity; P:oxidation reduction; F:binding	no IPS match	short-chain dehydrogenase [Source:VB External Description;Acc:AAEL003148]
AAEL008912-RA	hypothetical protein AaeL_AAEL008912 [Aedes aegypti]	2.04189	up	0.002005	0.000684629		2.15165	up	3.14369e-05	3.01064e-06	0.948989	C:integral to membrane	IPR013057; PTHR22950 (PANTHER), PTHR22950:SF9 (PANTHER)	amino acid transporter [Source:VB External Description;Acc:AAEL007197]
AAEL006814-RA	cytochrome p450 CYP9J20	2.03852	up	0.0011874	0.000320817		2.11713	up	2.0397e-05	1.32973e-06	0.962873	F:DNA-dependent ATPase activity; P:chromatin-mediated maintenance of transcription; P:axonogenesis; P:dendrite morphogenesis; F:general RNA polymerase II transcription factor activity; P:muscle organ development; P:phagocytosis, engulfment; F:helicase activity; F:transcription coactivator activity; F:DNA binding; P:imaginal disc-derived wing vein specification; P:oogenesis; P:hemocyte proliferati…	seg (SEG), SignalP-NN(euk) (SIGNALP)	helicase [Source:VB External Description;Acc:AAEL004942]
AAEL003145-RA	bestrophin isoform a	2.03479	up	0.0017441	0.000564344		2.13415	up	3.97869e-05	4.61644e-06	0.953442	P:axon guidance; P:cuticle pigmentation; F:beta-alanyl-dopamine hydrolase activity; P:embryonic development ending in birth or egg hatching; P:central nervous system development; P:pronuclear migration; P:heart development; C:tubulin complex; P:mitotic spindle organization; P:mitotic cell cycle spindle assembly checkpoint; P:embryonic cleavage; F:SUMO binding; P:penicillin biosynthetic process; F…	IPR005079	conserved hypothetical protein [Source:VB External Description;Acc:AAEL002457]
AAEL012888-RA	isoform h	2.03049	up	0.000240526	1.47624e-05		2.13957	up	0.000605446	0.000226344	0.949018	-	no IPS match	hypothetical protein [Source:VB External Description;Acc:AAEL002599]
AAEL003505-RA	jun-related isoform a	2.02956	up	0.00110763	0.000288503		2.84526	up	9.96702e-05	1.96575e-05	0.713311	F:binding	no IPS match	hypothetical protein [Source:VB External Description;Acc:AAEL006714]
AAEL006226-RA	sam hd domain protein	2.02887	up	0.00269973	0.00103663		2.39763	up	0.00114959	0.000498181	0.846199	P:cellular iron ion homeostasis; F:oxidoreductase activity; F:ferric iron binding; P:oxidation reduction; P:iron ion transport	IPR001519; IPR008331; IPR009040; IPR009078; IPR012347; PTHR11431:SF2 (PANTHER)	secreted ferritin G subunit precursor, putative [Source:VB External Description;Acc:AAEL007383]
AAEL014619-RA	cytochrome p450	2.02679	up	0.00473602	0.0021568		3.39325	up	1.4504e-05	6.98169e-07	0.597299	F:catalytic activity	IPR003607; IPR006674; IPR023279; PTHR11373 (PANTHER), PTHR11373:SF9 (PANTHER), SSF109604 (SUPERFAMILY)	sam/hd domain protein [Source:VB External Description;Acc:AAEL006226]
AAEL006542-RA	retinoid-inducible serine carboxypeptidase (serine carboxypeptidase	2.01736	up	0.000520651	8.20339e-05		2.8422	up	8.42948e-05	1.52295e-05	0.709789	C:intracellular; P:signal transduction	no IPS match	conserved hypothetical protein [Source:VB External Description;Acc:AAEL014901]
AAEL012207-RA	myosin light chain	2.01676	up	0.00617232	0.00299919		2.11258	up	8.1769e-05	1.44323e-05	0.954648	F:protein binding	IPR001202; PTHR15911 (PANTHER), PTHR15911:SF2 (PANTHER)	hypothetical protein [Source:VB External Description;Acc:AAEL010755]
AAEL012492-RA	cytochrome p450 CYP6AA5	2.01007	up	0.000297999	2.59444e-05		2.73991	up	0.000406888	0.000136332	0.733627	F:carboxypeptidase activity	no IPS match	conserved hypothetical protein [Source:VB External Description;Acc:AAEL009861]
AAEL007256-RA	atp-dependent dna helicase q1	2.00224	up	0.000390315	4.73687e-05		2.10249	up	0.000223305	6.0284e-05	0.952317	C:integral to membrane; F:CDP-alcohol phosphatidyltransferase activity; P:phospholipid biosynthetic process	IPR000462; PTHR14269 (PANTHER), PTHR14269:SF3 (PANTHER)	cdp-diacylglycerol--glycerol-3-phosphate 3-phosphatidyltransferase [Source:VB External Description;Acc:AAEL014198]
AAEL004440-RA	tubulin-specific chaperone e	2.00091	up	0.00134869	0.000390627		2.20919	up	9.27418e-05	1.75407e-05	0.905718	C:cytoplasm; F:protein tyrosine phosphatase activity; C:cytoskeleton; F:receptor activity; C:extrinsic to membrane; F:cytoskeletal protein binding; P:protein amino acid dephosphorylation	IPR000242; IPR000299; IPR000387; IPR011993; IPR014352; IPR016130; IPR018979; IPR018980; IPR019748; IPR019749; IPR019750; G3DSA:3.10.20.90 (GENE3D), G3DSA:3.90.190.10 (GENE3D), PTHR19134 (PANTHER), PTHR19134:SF79 (PANTHER), SSF50729 (SUPERFAMILY), SSF52799 (SUPERFAMILY), SSF54236 (SUPERFAMILY)	protein tyrosine phosphatase, non-receptor type nt6 [Source:VB External Description;Acc:AAEL010234]
AAEL006863-RB	hypothetical protein AaeL_AAEL006863 [Aedes aegypti]	3.53114	down	0.000240526	1.49808e-05		2.72113	down	0.000103312	2.07365e-05		-	no IPS match	hypothetical protein [Source:VB External Description;Acc:AAEL006863]
AAEL003201-RA	carboxylesterase	3.93718	down	0.00529101	0.00247631		3.56912	down	0.000121834	2.64602e-05		F:hydrolase activity; P:metabolic process	IPR002018; IPR019819; IPR019826; G3DSA:3.40.50.1820 (GENE3D), PTHR11559 (PANTHER), PTHR11559:SF116 (PANTHER), SSF53474 (SUPERFAMILY)
AAEL012584-RA	dna topoisomerase 2	2.62604	down	0.00166353	0.000528491		3.53134	down	0.0031712	0.00167474		F:four-way junction DNA binding; C:insoluble fraction; P:auxin biosynthetic process; P:mitotic spindle organization; P:mitotic chromosome condensation; F:SUMO binding; P:DNA topological change; P:chromatin silencing; C:cytoplasm; F:DNA topoisomerase (ATP-hydrolyzing) activity; P:metaphase plate congression; C:ACF complex; C:chromosome; P:meiosis; C:chromatin accessibility complex; F:rDNA binding;…	IPR001154; IPR001241; IPR002205; IPR003594; IPR013506; IPR013757; IPR013758; IPR013759; IPR013760; IPR014721; IPR018522; IPR020568; IPR020899; G3DSA:3.30.1490.30 (GENE3D), PTHR10169 (PANTHER), PTHR10169:SF19 (PANTHER)	DNA topoisomerase/gyrase [Source:VB External Description;Acc:AAEL012584]
AAEL004778-RA	acyl-coa dehydrogenase	4.14022	down	0.000291686	2.50159e-05		4.28704	down	4.45541e-06	5.36287e-08		F:FAD binding; P:oxidation reduction; F:acyl-CoA dehydrogenase activity	IPR006089; IPR006090; IPR006091; IPR006092; IPR009075; IPR009100; IPR013786; PTHR10909 (PANTHER), PTHR10909:SF128 (PANTHER)	acyl-coa dehydrogenase [Source:VB External Description;Acc:AAEL004778]
AAEL014153-RA	peptidyl-trna hydrolase mitochondrial	2.59009	down	9.06349e-05	5.4412e-07		2.44614	down	3.14272e-05	3.00574e-06		P:translation; F:aminoacyl-tRNA hydrolase activity	IPR002833; IPR023476; PTHR12649 (PANTHER), PTHR12649:SF6 (PANTHER), SignalP-NN(euk) (SIGNALP)	conserved hypothetical protein [Source:VB External Description;Acc:AAEL014153]
AAEL000505-RA	juvenile hormone-inducible	4.58671	down	0.000482738	7.26295e-05		4.22865	down	9.31896e-05	1.7696e-05		-	seg (SEG), SignalP-NN(euk) (SIGNALP), tmhmm (TMHMM)	conserved hypothetical protein [Source:VB External Description;Acc:AAEL000505]
AAEL007417-RA	activating transcription factor 7-interacting protein 1	2.9031	down	0.00301257	0.00121064		2.53307	down	0.000621737	0.000234243		C:chromosome	IPR003961; IPR008957; IPR013783; PTHR23210 (PANTHER), PTHR23210:SF4 (PANTHER)	hypothetical protein [Source:VB External Description;Acc:AAEL007417]
AAEL008723-RB	hig1 domain family member 1a	3.53261	down	0.000801078	0.00017588		3.91856	down	5.18249e-05	7.03875e-06		-	no IPS match	conserved hypothetical protein [Source:VB External Description;Acc:AAEL008723]
AAEL013980-RA	glutaredoxin 2	2.01332	down	0.00128293	0.000361363		2.02262	down	8.68461e-06	2.66628e-07		P:cell redox homeostasis; F:electron carrier activity; F:protein disulfide oxidoreductase activity	IPR002109; IPR011899; IPR012336; IPR014025; PTHR10168 (PANTHER)	glutaredoxin, putative [Source:VB External Description;Acc:AAEL013980]
AAEL015053-RA	2-oxo-4-hydroxy-4-carboxy-5-ureidoimidazoline decarboxylase	2.95423	down	0.000982239	0.000239843		2.28937	down	0.00273951	0.00141146		P:allantoin biosynthetic process	IPR017580; IPR018020; PTHR10395 (PANTHER), PTHR10395:SF6 (PANTHER)	conserved hypothetical protein [Source:VB External Description;Acc:AAEL015053]
AAEL014414-RA	eukaryotic initiation factor 4a-iii	3.11309	down	0.000153064	4.09007e-06		3.41143	down	7.65432e-06	1.73568e-07		F:translation initiation factor activity; C:eukaryotic translation initiation factor 4F complex; P:translational initiation; P:auxin biosynthetic process; F:ATP-dependent RNA helicase activity; C:precatalytic spliceosome; F:ATP binding; P:nuclear mRNA splicing, via spliceosome; C:catalytic step 2 spliceosome; P:response to DNA damage stimulus	IPR000629; IPR001650; IPR011545; IPR014001; IPR014014; G3DSA:3.40.50.300 (GENE3D), PTHR24031 (PANTHER), PTHR24031:SF143 (PANTHER), SSF52540 (SUPERFAMILY)	DEAD box ATP-dependent RNA helicase [Source:VB External Description;Acc:AAEL014414]
AAEL014250-RA	cg9273	11.5784	down	0.00130837	0.00037346		9.78791	down	0.00144173	0.000657385		P:DNA-dependent DNA replication; F:structural constituent of ribosome; C:lipid particle; C:DNA replication factor A complex; C:cytosolic large ribosomal subunit; P:translational elongation	IPR011991; IPR012340; IPR014646; IPR014892; IPR016027; PTHR13989 (PANTHER), SSF46785 (SUPERFAMILY)	insect replication protein a [Source:VB External Description;Acc:AAEL014250]
AAEL006580-RA	pq-loop repeat-containing protein 3-like	2.29145	down	0.00103733	0.000261048		2.43243	down	0.000204984	5.41272e-05		-	IPR006603; IPR016817; PTHR12226 (PANTHER), PF04193 (PFAM)	conserved hypothetical protein [Source:VB External Description;Acc:AAEL006580]
AAEL013119-RC	charged multivesicular body protein	2.16221	down	0.000437549	5.96098e-05		2.255	down	2.58816e-05	2.17218e-06		P:protein transport	IPR005024; PTHR10476 (PANTHER), PTHR10476:SF2 (PANTHER)	charged multivesicular body protein [Source:VB External Description;Acc:AAEL013119]
AAEL012179-RA	methylthioadenosine phosphorylase	5.71718	down	0.000222227	1.2361e-05		4.53925	down	5.12167e-05	6.91732e-06		P:nicotinamide riboside catabolic process; F:protein binding; P:response to hydrogen peroxide; C:intracellular membrane-bounded organelle; P:regulation of molecular function; P:cellular response to reactive oxygen species; P:regulation of cellular metabolic process; F:oxidoreductase activity; P:organ development; P:cellular homeostasis; F:phosphorylase activity; C:cytoplasmic part; F:transferase …	IPR000845; IPR001369; IPR010044; IPR018099; G3DSA:3.40.50.1580 (GENE3D), PTHR11904:SF1 (PANTHER), SSF53167 (SUPERFAMILY)	methylthioadenosine phosphorylase [Source:VB External Description;Acc:AAEL012179]
AAEL013089-RA	proteasome subunit alpha type	4.59928	down	0.000170386	5.98607e-06		4.24786	down	4.34344e-06	4.39009e-08		C:cytoplasm; C:proteasome core complex, alpha-subunit complex; P:ubiquitin-dependent protein catabolic process; C:nucleus; F:threonine-type endopeptidase activity	seg (SEG)	proteasome subunit alpha type [Source:VB External Description;Acc:AAEL013089]
AAEL005394-RA	rna binding protein	3.71216	down	0.000375716	4.34085e-05		3.94104	down	5.71791e-06	8.52449e-08		F:general RNA polymerase II transcription factor activity; F:mRNA binding; C:transcription factor TFIID complex; F:zinc ion binding; P:nuclear mRNA splicing, via spliceosome; F:nucleotide binding; C:catalytic step 2 spliceosome	IPR000504; IPR012677; PTHR23238 (PANTHER), PTHR23238:SF8 (PANTHER), SSF54928 (SUPERFAMILY)	conserved hypothetical protein [Source:VB External Description;Acc:AAEL005394]
AAEL006574-RA	nuclear transcription x-box binding 1	2.40229	down	0.00386324	0.00166441		2.48207	down	0.000493316	0.000175076		F:transcription factor activity; C:nucleus; F:zinc ion binding; P:regulation of transcription, DNA-dependent	IPR000967; IPR019786; PTHR12360 (PANTHER)	nuclear transcription factor, x-box binding 1 (nfx1) [Source:VB External Description;Acc:AAEL006574]
AAEL007173-RA	tumor protein d54-like	2.47003	down	0.000182126	7.2374e-06		2.84568	down	2.26934e-05	1.69297e-06		-	IPR007327; PTHR19307:SF4 (PANTHER)	conserved hypothetical protein [Source:VB External Description;Acc:AAEL007173]
AAEL001931-RA	o-sialoglycoprotein endopeptidase	2.25282	down	0.000259965	1.98007e-05		2.1632	down	0.000225808	6.10237e-05		F:metalloendopeptidase activity; P:proteolysis; F:zinc ion binding	IPR000905; IPR017860; IPR017861; PTHR11735 (PANTHER), SSF53067 (SUPERFAMILY)	o-sialoglycoprotein endopeptidase [Source:VB External Description;Acc:AAEL001931]
AAEL003871-RA	proteasome alpha 3 subunit	2.29708	down	0.000433821	5.84012e-05		2.14663	down	5.78542e-05	8.43285e-06		C:cytoplasm; C:proteasome core complex, alpha-subunit complex; P:ubiquitin-dependent protein catabolic process; P:response to DNA damage stimulus; C:nucleus; F:threonine-type endopeptidase activity	IPR000426; IPR001353; IPR023332; G3DSA:3.60.20.10 (GENE3D), PTHR11599 (PANTHER), PTHR11599:SF10 (PANTHER), SSF56235 (SUPERFAMILY)	proteasome subunit alpha type [Source:VB External Description;Acc:AAEL003871]
AAEL002061-RA	cation-transporting atpase 13a1 (g-box binding protein)	2.25544	down	0.000643974	0.000121433		2.17343	down	0.00124144	0.000550689		P:auxin biosynthetic process; C:integral to membrane; F:ATPase activity, coupled to transmembrane movement of ions, phosphorylative mechanism; P:ATP biosynthetic process; F:ATP binding; P:cation transport	IPR001757; IPR006544; IPR008250; IPR018303; IPR023214; IPR023299; IPR023300; IPR023306; PTHR24093 (PANTHER), PTHR24093:SF48 (PANTHER), PF12710 (PFAM), SSF81653 (SUPERFAMILY), SSF81665 (SUPERFAMILY)	cation-transporting ATPase 13a1 (g-box binding protein) [Source:VB External Description;Acc:AAEL002061]
AAEL009851-RA	dna polymerase zeta catalytic subunit	2.19399	down	0.00114011	0.000301022		2.16636	down	0.000124318	2.72352e-05		F:DNA-directed DNA polymerase activity; P:DNA replication; F:DNA binding; F:3'-5' exonuclease activity; F:nucleotide binding	IPR006133; IPR006134; IPR006172; IPR012337; IPR017964; IPR023211; G3DSA:3.30.420.10 (GENE3D), PTHR10322 (PANTHER), PTHR10322:SF5 (PANTHER), SSF56672 (SUPERFAMILY)	DNA polymerase zeta catalytic subunit [Source:VB External Description;Acc:AAEL009851]
AAEL013098-RA	coatomer subunit alpha	2.47445	down	0.00194083	0.000656295		2.69667	down	0.000106912	2.18686e-05		P:retrograde vesicle-mediated transport, Golgi to ER; F:protein binding; P:intracellular protein transport; P:phagocytosis, engulfment; C:COPI vesicle coat; F:structural molecule activity	IPR001680; IPR006692; IPR010714; IPR011046; IPR015943; IPR016391; IPR017986; IPR019775; IPR019781; IPR019782; IPR020472; PTHR19876 (PANTHER), SSF101908 (SUPERFAMILY)	coatomer [Source:VB External Description;Acc:AAEL013098]
AAEL017539-RA	cytochrome p450	2.70184	down	0.000122578	1.54015e-06		2.39582	down	8.46802e-05	1.53312e-05		F:heme binding; P:oxidation reduction; F:monooxygenase activity; F:electron carrier activity	IPR001128; IPR002401; IPR017972; PTHR24292 (PANTHER), PTHR24292:SF131 (PANTHER), seg (SEG), SignalP-NN(euk) (SIGNALP)	cytochrome P450 [Source:VB External Description;Acc:AAEL017539]
AAEL015309-RA	actin-related protein 87c	2.12463	down	0.00496598	0.00229248		2.00898	down	0.00574261	0.00336213		C:cytoplasm; F:structural constituent of cytoskeleton; C:actin filament; F:actin binding; C:dynactin complex; P:cytoskeleton organization; F:ATP binding	IPR004000; IPR004001; IPR020902; G3DSA:3.30.420.40 (GENE3D), G3DSA:3.90.640.10 (GENE3D), PTHR11937:SF46 (PANTHER), SSF53067 (SUPERFAMILY)	actin [Source:VB External Description;Acc:AAEL015309]
AAEL010442-RA	4-hydroxyphenylpyruvate dioxygenase	3.5042	down	0.00038151	4.4842e-05		2.79863	down	0.000236647	6.54657e-05		F:metal ion binding; F:lactoylglutathione lyase activity; F:4-hydroxyphenylpyruvate dioxygenase activity; P:aromatic amino acid family metabolic process	IPR004360; IPR005956; G3DSA:3.10.180.10 (GENE3D), SSF54593 (SUPERFAMILY)	4-hydroxyphenylpyruvate dioxygenase [Source:VB External Description;Acc:AAEL010442]
AAEL009623-RA	rna 3 -terminal phosphate cyclase	3.09471	down	0.00024892	1.65741e-05		3.18322	down	1.49286e-05	7.4057e-07		C:nucleoplasm; P:RNA processing; F:RNA-3'-phosphate cyclase activity	IPR000228; IPR013791; IPR013792; IPR013796; IPR017770; IPR023797	RNA 3' terminal phosphate cyclase [Source:VB External Description;Acc:AAEL009623]
AAEL004430-RA	mitochondrial ribosomal protein l30	2.47939	down	0.000550014	9.28127e-05		2.71347	down	2.61535e-05	2.2304e-06		C:mitochondrial large ribosomal subunit; F:structural constituent of ribosome; P:translation	SignalP-NN(euk) (SIGNALP)	mitochondrial ribosomal protein, L30, putative [Source:VB External Description;Acc:AAEL004430]
AAEL005411-RA	equilibrative nucleoside transporter	4.03774	down	0.00153119	0.000471239		3.76003	down	0.000111778	2.34149e-05		P:transport; C:membrane; F:nucleoside transmembrane transporter activity	IPR002259; IPR016196; PTHR10332:SF6 (PANTHER), seg (SEG), SignalP-NN(euk) (SIGNALP), tmhmm (TMHMM)	equilibrative nucleoside transporter [Source:VB External Description;Acc:AAEL005411]
AAEL015011-RA	inositol monophosphatase	2.0349	down	0.00139241	0.000408716		2.00993	down	2.88492e-05	2.61953e-06		C:cytoplasm; P:phosphatidylinositol biosynthetic process; P:signal transduction; F:inositol-1(or 4)-monophosphatase activity; P:inositol phosphate dephosphorylation; F:protein homodimerization activity	IPR000760; G3DSA:3.30.540.10 (GENE3D), PTHR20854:SF4 (PANTHER), SSF56655 (SUPERFAMILY)	hypothetical protein [Source:VB External Description;Acc:AAEL015011]
AAEL011544-RA	mago nashi	3.56228	down	0.000243577	1.5757e-05		3.99042	down	3.23865e-05	3.18972e-06		P:nuclear-transcribed mRNA catabolic process, nonsense-mediated decay; P:oocyte microtubule cytoskeleton polarization; P:cell-cell signaling; P:mRNA export from nucleus; C:nuclear speck; C:precatalytic spliceosome; F:SUMO binding; P:pole plasm protein localization; P:regulation of pole plasm oskar mRNA localization; C:catalytic step 2 spliceosome; P:maintenance of pole plasm mRNA location; P:nucl…	IPR004023	mago nashi, putative [Source:VB External Description;Acc:AAEL011544]
AAEL002454-RA	zinc finger protein gfi-1	2.23339	down	0.00159416	0.000497859		2.11298	down	0.00117512	0.00051355		F:cytochrome-c oxidase activity; F:zinc ion binding; P:inner ear development; P:regulation of cell fate specification; C:nucleus	IPR007087; IPR012934; IPR013087; IPR015880; PTHR11389 (PANTHER), SSF57667 (SUPERFAMILY), SSF57716 (SUPERFAMILY)	conserved hypothetical protein [Source:VB External Description;Acc:AAEL002454]
AAEL012220-RA	hypothetical protein AaeL_AAEL012220 [Aedes aegypti]	2.32975	down	0.00133549	0.000384484		2.71486	down	1.72155e-05	9.28089e-07		-	no IPS match	hypothetical protein [Source:VB External Description;Acc:AAEL012220]
AAEL012283-RA	diaphanous	2.65961	down	0.00467014	0.00212222		3.10932	down	0.000530493	0.000191219		P:maintenance of protein location in cell; P:protein secretion; P:actin filament organization; C:adherens junction; P:spindle assembly; P:regulation of embryonic cell shape; C:actomyosin contractile ring; P:spermatogenesis; P:pole cell formation; C:cleavage furrow; P:cytokinesis, actomyosin contractile ring assembly; F:actin binding; P:pseudocleavage during syncytial blastoderm formation; C:actin…	IPR003104; IPR010465; IPR010472; IPR010473; IPR014767; IPR014768; IPR015425; IPR016024; PTHR23213 (PANTHER), PTHR23213:SF13 (PANTHER)	diaphanous [Source:VB External Description;Acc:AAEL012283]
AAEL009041-RC	arp2 3 complex 20 kd subunit	2.65365	down	0.000546258	9.07982e-05		2.76336	down	2.65235e-05	2.30802e-06		C:Arp2/3 protein complex; F:protein binding, bridging; P:regulation of cell shape; F:actin filament binding; P:actin filament polymerization; P:phagocytosis, engulfment; C:cell projection; P:cortical actin cytoskeleton organization; P:actin nucleation; C:cytoplasm; P:cell projection assembly	IPR008384; G3DSA:3.30.1460.20 (GENE3D), SignalP-NN(euk) (SIGNALP), SSF69645 (SUPERFAMILY)	arp2/3 complex 20 kd subunit [Source:VB External Description;Acc:AAEL009041]
AAEL002937-RA	synaptic vesicle protein	6.60476	down	0.00323943	0.00133729		3.18177	down	0.000278337	8.27452e-05		P:transmembrane transport	IPR016196; IPR020846; G3DSA:1.20.1250.20 (GENE3D)	hypothetical protein [Source:VB External Description;Acc:AAEL002937]
AAEL007052-RA	pancreatic triacylglycerol lipase	4.7042	down	0.00422601	0.00186137		3.83845	down	7.61653e-05	1.29389e-05		F:hydrolase activity; P:lipid metabolic process	IPR000734; IPR013818; G3DSA:3.40.50.1820 (GENE3D), PTHR11610:SF10 (PANTHER), SSF53474 (SUPERFAMILY)	lipase [Source:VB External Description;Acc:AAEL007052]
AAEL007479-RA	hypothetical protein AaeL_AAEL007479 [Aedes aegypti]	2.63373	down	0.00362821	0.00153628		3.4147	down	0.00033414	0.000105288		-	SignalP-NN(euk) (SIGNALP)	hypothetical protein [Source:VB External Description;Acc:AAEL007479]
AAEL012327-RA	pet191 polypeptide	2.11956	down	0.00128286	0.000361096		2.23307	down	6.18311e-05	9.42114e-06		-	IPR018793	PET191 polypeptide, putative [Source:VB External Description;Acc:AAEL012327]
AAEL003908-RA	nup107	4.10427	down	0.00104192	0.000262714		3.56576	down	0.000749744	0.000295446		C:nuclear pore; P:transport	IPR007252	nuclear pore complex protein nup107 [Source:VB External Description;Acc:AAEL003908]
AAEL011116-RC	14-3-3 protein beta alpha	3.28607	down	0.00196984	0.000667868		3.61113	down	8.30956e-05	1.48539e-05		P:response to radiation; P:wing disc dorsal/ventral pattern formation; P:Ras protein signal transduction; F:SUMO binding; C:germline ring canal; P:germarium-derived oocyte fate determination; P:regulation of mitosis; P:oocyte microtubule cytoskeleton polarization; P:DNA damage checkpoint; F:protein domain specific binding; P:nonassociative learning; C:chromosome; P:mitotic cell cycle checkpoint; …	no IPS match	14-3-3 protein sigma, gamma, zeta, beta/alpha [Source:VB External Description;Acc:AAEL011116]
AAEL011478-RB	dynein light chain cytoplasmic	2.79215	down	0.00144529	0.00043347		2.57534	down	0.000492546	0.000174554		F:microtubule motor activity; F:cytoskeletal protein binding; C:cytosol; P:sperm individualization; C:microtubule; P:actin filament bundle assembly; C:myosin complex; F:ATPase activity, coupled; P:imaginal disc-derived wing morphogenesis; C:cytoplasmic dynein complex; P:microtubule-based movement; F:dynein intermediate chain binding; C:P granule; P:synaptic target recognition; P:intracellular tra…	IPR001372; IPR019763	cytoplasmic dynein light chain [Source:VB External Description;Acc:AAEL011478]
AAEL005739-RA	slit homolog 1	4.12469	down	0.000152043	3.89716e-06		4.39507	down	4.30747e-05	5.20606e-06		P:embryonic development; P:defense response; F:protein binding; C:cell part	IPR000483; IPR001611; IPR003591; PR00019 (PRINTS), G3DSA:3.80.10.10 (GENE3D), PTHR24365 (PANTHER), PF12799 (PFAM), SSF52058 (SUPERFAMILY)	conserved hypothetical protein [Source:VB External Description;Acc:AAEL005739]
AAEL014794-RB	mitochondrial transcription factor	2.00196	down	0.00211922	0.000741805		2.15595	down	0.00027868	8.29428e-05		C:mitochondrion; F:DNA binding; C:nucleus	seg (SEG), tmhmm (TMHMM)	mitochondrial transcription factor A, putative [Source:VB External Description;Acc:AAEL014794]
AAEL007987-RA	sec63	2.05686	down	0.00128063	0.000359462		2.18327	down	0.00185533	0.000893559		P:protein folding; F:signal recognition particle binding; F:unfolded protein binding; F:heat shock protein binding	IPR001623; IPR003095; IPR004179; G3DSA:1.10.150.20 (GENE3D), G3DSA:1.10.3380.10 (GENE3D), G3DSA:2.60.40.150 (GENE3D), PTHR24075 (PANTHER)	SEC63 protein, putative [Source:VB External Description;Acc:AAEL007987]
AAEL011606-RB	isoform c	2.11779	down	0.000377971	4.38079e-05		2.33711	down	3.6656e-05	4.07061e-06		P:regulation of lamellipodium assembly; C:muscle thin filament tropomyosin; P:pole plasm oskar mRNA localization; F:actin binding; P:dendrite morphogenesis; P:muscle contraction	PTHR15099 (PANTHER)	conserved hypothetical protein [Source:VB External Description;Acc:AAEL011606]
AAEL010245-RD	chloride	3.20024	down	0.000388116	4.70286e-05		3.32014	down	4.57027e-07	1.15484e-10		P:chloride transport; P:cell volume homeostasis	PTHR21399 (PANTHER), PF03517 (PFAM)	chloride channel, putative [Source:VB External Description;Acc:AAEL010245]
AAEL003238-RA	zinc finger dhhc domain containing protein 16	2.84264	down	0.00143648	0.000429607		2.84281	down	2.72775e-05	2.40552e-06		F:zinc ion binding	IPR001594; PTHR22883 (PANTHER)	conserved hypothetical protein [Source:VB External Description;Acc:AAEL003238]
AAEL006374-RA	btb poz domain-containing protein kctd9	2.21071	down	0.000381608	4.50351e-05		2.30189	down	0.000105731	2.15469e-05		C:voltage-gated potassium channel complex; F:voltage-gated potassium channel activity; F:protein binding; P:potassium ion transport	IPR000210; IPR001646; IPR003131; IPR011333; G3DSA:3.80.10.10 (GENE3D), PTHR14958 (PANTHER), PTHR14958:SF5 (PANTHER), SSF141571 (SUPERFAMILY)	conserved hypothetical protein [Source:VB External Description;Acc:AAEL006374]
AAEL011317-RA	brahma associated protein 55kd	2.42627	down	0.00103155	0.000259467		2.74267	down	2.36122e-05	1.83224e-06		P:cytokinesis; P:muscle organ development; P:cytoskeleton organization; C:brahma complex; F:structural constituent of cytoskeleton; C:actin filament; F:transcription coactivator activity; P:positive regulation of transcription, DNA-dependent; P:dendrite morphogenesis	IPR004000; G3DSA:3.30.420.40 (GENE3D), G3DSA:3.90.640.10 (GENE3D), PTHR11937:SF32 (PANTHER), SSF53067 (SUPERFAMILY)	actin [Source:VB External Description;Acc:AAEL011317]
AAEL013783-RB	protein farnesyltransferase alpha subunit	2.99954	down	0.000155813	4.38601e-06		2.35812	down	8.2165e-06	2.30456e-07		F:protein prenyltransferase activity; P:protein amino acid prenylation; C:protein farnesyltransferase complex	seg (SEG), tmhmm (TMHMM)	protein farnesyltransferase alpha subunit [Source:VB External Description;Acc:AAEL013783]
AAEL003760-RA	juvenile hormone-inducible	2.77869	down	0.000182405	7.40905e-06		2.60518	down	0.00145259	0.000663989		P:cell-matrix adhesion; P:integrin-mediated signaling pathway; F:binding; F:receptor activity; C:integral to membrane; P:cell adhesion; C:membrane; C:integrin complex	IPR004119; PTHR11012 (PANTHER)	conserved hypothetical protein [Source:VB External Description;Acc:AAEL003760]
AAEL008298-RA	hypothetical protein AaeL_AAEL008298 [Aedes aegypti]	7.09641	down	0.0042369	0.00186928		3.68244	down	0.000292181	8.85716e-05		-	no IPS match	hypothetical protein [Source:VB External Description;Acc:AAEL008298]
AAEL011163-RA	hypothetical protein AaeL_AAEL011163 [Aedes aegypti]	2.39529	down	0.0010852	0.000279252		2.26098	down	0.000383065	0.000126269		P:biological_process; C:cellular_component	no IPS match	conserved hypothetical protein [Source:VB External Description;Acc:AAEL011163]
AAEL012093-RA	leucine-rich transmembrane protein	5.38227	down	0.00141676	0.000421453		4.43935	down	0.000232175	6.37417e-05		F:protein binding; C:integral to membrane	IPR000372; IPR000483; IPR001611; IPR003591; G3DSA:3.80.10.10 (GENE3D), PTHR24368 (PANTHER), PTHR24368:SF121 (PANTHER), PF12799 (PFAM), SSF52058 (SUPERFAMILY)	leucine-rich transmembrane protein [Source:VB External Description;Acc:AAEL012093]
AAEL002998-RA	set domain-containing protein 3	2.19886	down	0.00283975	0.00111301		2.11013	down	0.000105206	2.13762e-05		F:molecular_function	IPR015353; G3DSA:3.90.1410.10 (GENE3D), PTHR13271 (PANTHER), PTHR13271:SF7 (PANTHER), seg (SEG), SSF82199 (SUPERFAMILY)	conserved hypothetical protein [Source:VB External Description;Acc:AAEL002998]
AAEL005637-RA	cg3004-pa	11.3745	down	0.000152043	3.98364e-06		7.8486	down	3.15823e-05	3.05268e-06		C:heterotrimeric G-protein complex	IPR001680; IPR011046; IPR015943; IPR017986; IPR019775; IPR019781; IPR019782; IPR020472; PTHR19842 (PANTHER)	vegetatible incompatibility protein HET-E-1, putative [Source:VB External Description;Acc:AAEL005637]
AAEL003695-RA	phd finger-like domain-containing protein 5a	2.97695	down	0.000568305	9.72706e-05		3.11047	down	8.41239e-06	2.45587e-07		C:nuclear matrix; C:nucleolus; C:precatalytic spliceosome; C:U2 snRNP; F:transcription factor activity; P:nuclear mRNA splicing, via spliceosome; C:catalytic step 2 spliceosome; P:positive regulation of transcription, DNA-dependent	IPR005345	conserved hypothetical protein [Source:VB External Description;Acc:AAEL003695]
AAEL014646-RA	ubiquinone biosynthesis protein	2.94346	down	0.00139988	0.000412211		2.47164	down	0.00103213	0.000436455		C:mitochondrial inner membrane; P:ubiquinone biosynthetic process	IPR007715; PTHR12922 (PANTHER)	Ubiquinone biosynthesis protein COQ4 homolog, mitochondrial Precursor (Coenzyme Q biosynthesis protein 4 homolog) [Source:VB External Description;Acc:AAEL014646]
AAEL002970-RA	vacuolar protein-sorting-associated protein 25	2.22112	down	0.000162494	5.25589e-06		2.28033	down	5.5416e-05	7.77152e-06		P:regulation of apoptosis; P:epithelial structure maintenance; P:regulation of multivesicular body size involved in endosome transport; P:cell differentiation; P:maintenance of epithelial cell apical/basal polarity; P:negative regulation of epithelial cell proliferation	seg (SEG)	conserved hypothetical protein [Source:VB External Description;Acc:AAEL002970]
AAEL002551-RA	dna topoisomerase type i	2.54769	down	0.000617347	0.000112926		3.19744	down	0.00262792	0.00134505		C:polytene chromosome puff; P:DNA unwinding involved in replication; P:chromosome condensation; C:nucleolus; F:DNA topoisomerase type I activity; P:instar larval development; P:chromosome segregation; C:DNA-directed RNA polymerase II, core complex; C:nuclear euchromatin; P:embryonic development; F:DNA topoisomerase (ATP-hydrolyzing) activity; P:oogenesis; P:DNA topological change; P:cell prolifer…	IPR001631; IPR008336; IPR009054; IPR011010; IPR013030; IPR013034; IPR013499; IPR013500; IPR014711; IPR014727; IPR018521; PTHR10290 (PANTHER)	DNA topoisomerase type I [Source:VB External Description;Acc:AAEL002551]
AAEL011873-RA	ubiquitin-conjugating enzyme	2.06531	down	0.000963074	0.00023422		2.14437	down	0.000247551	7.01213e-05		F:ubiquitin-protein ligase activity; P:regulation of protein metabolic process; P:post-translational protein modification	IPR000608; IPR016135; PTHR24067 (PANTHER), PTHR24067:SF8 (PANTHER), SM00212 (SMART)	ubiquitin-conjugating enzyme [Source:VB External Description;Acc:AAEL011873]
AAEL011554-RA	adhesion regulating molecule 1 (110 kda cell membrane glycoprotein)	2.39984	down	0.000444021	6.15949e-05		2.61602	down	1.82266e-05	1.04394e-06		C:cytoplasm; C:proteasome complex; C:nucleus; P:proteasome assembly; F:proteasome activator activity	IPR006773	adhesion regulating molecule 1 (110 kda cell membrane glycoprotein) [Source:VB External Description;Acc:AAEL011554]
AAEL004552-RA	lin-52 homolog	5.00768	down	0.000404959	5.13517e-05		4.73598	down	2.89225e-06	1.70303e-08		F:molecular_function; P:biological_process	IPR018737	conserved hypothetical protein [Source:VB External Description;Acc:AAEL004552]
AAEL003611-RA	stearoyl-coa desaturase	2.49259	down	0.00196984	0.000668277		2.6765	down	9.08928e-05	1.71221e-05		P:fatty acid biosynthetic process; C:integral to membrane; P:oxidation reduction; F:oxidoreductase activity, acting on paired donors, with oxidation of a pair of donors resulting in the reduction of molecular oxygen to two molecules of water	IPR005804; IPR015876; PTHR11351 (PANTHER)	stearoyl-coa desaturase [Source:VB External Description;Acc:AAEL003611]
AAEL009880-RA	aurora kinase a	4.51681	down	0.000455431	6.54356e-05		4.47279	down	1.57434e-05	7.996e-07		P:protein amino acid phosphorylation; P:establishment of spindle orientation; P:auxin biosynthetic process; P:regulation of neurogenesis; F:protein serine/threonine kinase activity; C:centrosome; P:mitotic centrosome separation; F:enzyme binding; F:ATP binding; P:asymmetric protein localization involved in cell fate determination; C:spindle pole; P:response to estradiol stimulus	IPR000719; IPR002290; IPR008271; IPR011009; IPR017441; IPR017442; G3DSA:1.10.510.10 (GENE3D), G3DSA:3.30.200.20 (GENE3D), PTHR24349 (PANTHER), PTHR24349:SF49 (PANTHER)	serine/threonine protein kinase [Source:VB External Description;Acc:AAEL009880]
AAEL008700-RA	survival motor neuron	2.15665	down	0.00122147	0.000334513		2.10887	down	1.41092e-05	6.51126e-07		F:nucleic acid binding	IPR002999; IPR010304; IPR018351; G3DSA:2.30.30.140 (GENE3D), PTHR12664 (PANTHER), seg (SEG), SSF63748 (SUPERFAMILY)	conserved hypothetical protein [Source:VB External Description;Acc:AAEL008700]
AAEL014167-RA	u1 small nuclear ribonucleoprotein a	2.54649	down	0.00122918	0.000338093		2.74282	down	2.93583e-05	2.69047e-06		F:mRNA binding; F:U1 snRNA binding; C:protein complex; C:precatalytic spliceosome; C:U2 snRNP; P:regulation of alternative nuclear mRNA splicing, via spliceosome; C:U1 snRNP; C:U11 snRNP; P:female germ-line sex determination; F:protein binding; F:nucleotide binding; C:catalytic step 2 spliceosome; P:primary sex determination, soma; P:oogenesis	seg (SEG), tmhmm (TMHMM)	U1 small nuclear ribonucleoprotein A [Source:VB External Description;Acc:AAEL014167]
AAEL015060-RA	rad51-like 3 ( cerevisiae)	3.13066	down	0.00613284	0.002974		2.75533	down	0.000484366	0.000171199		P:DNA metabolic process; F:DNA binding; F:ATP binding; F:DNA-dependent ATPase activity	IPR013632; IPR020588; G3DSA:1.10.150.20 (GENE3D), G3DSA:3.40.50.300 (GENE3D), PTHR22942 (PANTHER), PTHR22942:SF8 (PANTHER), SSF52540 (SUPERFAMILY)	Rad51A protein, putative [Source:VB External Description;Acc:AAEL015060]
AAEL011661-RA	cg14551 cg14551-pa	5.60515	down	0.000320912	3.07254e-05		4.85246	down	4.97573e-05	6.58192e-06		P:proteolysis; F:metallocarboxypeptidase activity; F:carboxypeptidase activity; F:zinc ion binding	no IPS match	conserved hypothetical protein [Source:VB External Description;Acc:AAEL011661]
AAEL004910-RA	isoform b	2.60061	down	0.00785687	0.0040324		2.03455	down	0.00502149	0.00287142		-	SignalP-NN(euk) (SIGNALP)	conserved hypothetical protein [Source:VB External Description;Acc:AAEL004910]
AAEL005296-RA	fatty acyl- reductase 2	2.56692	down	0.000162105	5.22342e-06		3.16705	down	6.57176e-06	1.15411e-07		F:catalytic activity; P:metabolic process; F:binding	IPR004262; IPR013120; IPR016040; PTHR11011 (PANTHER), PTHR11011:SF7 (PANTHER), SSF51735 (SUPERFAMILY)	conserved hypothetical protein [Source:VB External Description;Acc:AAEL005296]
AAEL007671-RA	hypothetical protein AaeL_AAEL007671 [Aedes aegypti]	3.40773	down	0.000123467	1.66194e-06		4.29208	down	3.50789e-05	3.73216e-06		-	no IPS match	hypothetical protein [Source:VB External Description;Acc:AAEL007671]
AAEL001216-RA	dead box atp-dependent rna helicase	2.30966	down	0.00111839	0.000292794		3.4323	down	6.5306e-05	1.04126e-05		F:SUMO binding; P:auxin biosynthetic process; F:ATP-dependent RNA helicase activity; C:spliceosomal complex; F:nucleic acid binding; P:regulation of alternative nuclear mRNA splicing, via spliceosome; P:mitotic spindle organization; F:ATP binding; P:mRNA export from nucleus	IPR001650; IPR011545; IPR014001; IPR014014; G3DSA:3.40.50.300 (GENE3D), PTHR24031 (PANTHER), PTHR24031:SF5 (PANTHER), seg (SEG), SSF52540 (SUPERFAMILY)	DEAD box ATP-dependent RNA helicase [Source:VB External Description;Acc:AAEL001216]
AAEL007477-RA	ubiquitin-conjugating enzyme e2 i	3.62776	down	0.000556613	9.46555e-05		4.16689	down	0.000354174	0.000114061		P:negative regulation of hemocyte proliferation; C:outer kinetochore of condensed chromosome; F:protein binding; P:negative regulation of lamellocyte differentiation; F:SUMO ligase activity; P:humoral immune response; P:zygotic specification of dorsal/ventral axis; P:regulation of protein metabolic process; P:negative regulation of Toll signaling pathway; P:female meiosis chromosome segregation; …	IPR000608; IPR016135; IPR023313; PTHR24067 (PANTHER), PTHR24067:SF32 (PANTHER), SM00212 (SMART)	ubiquitin-conjugating enzyme E2 i [Source:VB External Description;Acc:AAEL007477]
AAEL007572-RB	fidipidine	2.57432	down	0.000375684	4.33128e-05		2.45344	down	7.23966e-05	1.19565e-05		-	IPR019159; PTHR16441 (PANTHER)	fidipidine [Source:VB External Description;Acc:AAEL007572]
AAEL011554-RB	adhesion regulating molecule 1 (110 kda cell membrane glycoprotein)	2.49874	down	0.000239944	1.44245e-05		2.57077	down	5.91017e-05	8.76632e-06		C:cytoplasm; C:proteasome complex; C:nucleus; P:proteasome assembly; F:proteasome activator activity	seg (SEG)	adhesion regulating molecule 1 (110 kda cell membrane glycoprotein) [Source:VB External Description;Acc:AAEL011554]
AAEL014867-RA	apoptosis inhibitor	2.57909	down	0.000309623	2.82614e-05		2.46138	down	1.78244e-05	9.96171e-07		F:binding	IPR008383; PTHR12758 (PANTHER), PTHR12758:SF11 (PANTHER)	apoptosis inhibitor [Source:VB External Description;Acc:AAEL014867]
AAEL015578-RA	esterase b1	10.0138	down	0.000186691	8.23327e-06		6.47272	down	7.93048e-06	2.11559e-07		F:carboxylesterase activity	IPR002018; IPR019826; G3DSA:3.40.50.1820 (GENE3D), PTHR11559 (PANTHER), PTHR11559:SF26 (PANTHER), SSF53474 (SUPERFAMILY)	alpha-esterase [Source:VB External Description;Acc:AAEL015578]
AAEL009041-RB	arp2 3 complex 20 kd subunit	2.61359	down	0.000546576	9.16123e-05		2.77812	down	0.000228833	6.22988e-05		C:Arp2/3 protein complex; F:protein binding, bridging; P:regulation of cell shape; F:actin filament binding; P:actin filament polymerization; P:phagocytosis, engulfment; C:cell projection; P:cortical actin cytoskeleton organization; P:actin nucleation; C:cytoplasm; P:cell projection assembly	IPR008384; G3DSA:3.30.1460.20 (GENE3D), SignalP-NN(euk) (SIGNALP), SSF69645 (SUPERFAMILY)	arp2/3 complex 20 kd subunit [Source:VB External Description;Acc:AAEL009041]
AAEL008320-RA	chromosome transmission fidelity protein 18	2.20642	down	0.00173428	0.000559678		2.14711	down	0.00190742	0.000923468		P:auxin biosynthetic process; P:cell proliferation; F:ATP binding; F:nucleoside-triphosphatase activity; P:macromolecule metabolic process; C:nucleus; P:primary metabolic process	SignalP-NN(euk) (SIGNALP), tmhmm (TMHMM)	conserved hypothetical protein [Source:VB External Description;Acc:AAEL008320]
AAEL004010-RC	splicing	3.5575	down	0.000233155	1.34546e-05		3.87765	down	2.89667e-06	1.94667e-08		C:cytosol; F:nucleotide binding; P:translational initiation; F:translation initiation factor activity; F:mRNA binding	IPR000504; IPR012677; PTHR23236 (PANTHER), SSF54928 (SUPERFAMILY)	splicing factor, putative [Source:VB External Description;Acc:AAEL004010]
AAEL014489-RA	cg18643-like protein	2.8598	down	0.000918881	0.000216042		2.32765	down	0.000101436	2.00936e-05		C:cytoplasm; F:hydrolase activity, acting on ester bonds; P:D-amino acid catabolic process	IPR003732; IPR023509; PTHR10472:SF3 (PANTHER)	D-tyrosyl-tRNA(Tyr) deacylase [Source:VB External Description;Acc:AAEL014489]
AAEL011021-RB	gata zinc finger domain-containing protein 1	2.12815	down	0.00177278	0.000578202		2.01697	down	0.00177891	0.00084866		F:sequence-specific DNA binding; F:transcription factor activity; F:zinc ion binding; P:regulation of transcription, DNA-dependent	IPR000679; coil (COIL), PTHR13340 (PANTHER), seg (SEG)	hypothetical protein [Source:VB External Description;Acc:AAEL011021]
AAEL012904-RA	rab gdp-dissociation inhibitor	2.06407	down	0.0011874	0.000320961		2.02646	down	2.04726e-05	1.35536e-06		P:neurotransmitter secretion; P:regulation of GTPase activity; C:synaptic vesicle; P:vesicle-mediated transport; F:Rab GDP-dissociation inhibitor activity; P:protein transport	IPR000806; IPR018203; G3DSA:3.30.519.10 (GENE3D), G3DSA:3.50.50.60 (GENE3D), PTHR11787 (PANTHER), SSF51905 (SUPERFAMILY)	rab gdp-dissociation inhibitor [Source:VB External Description;Acc:AAEL012904]
AAEL005730-RA	cop9 signalosome complex subunit 2	2.4442	down	0.000107618	8.17489e-07		2.30788	down	3.12103e-05	2.97316e-06		F:signal transducer activity; C:signalosome; P:protein stabilization; P:phagocytosis, engulfment; F:transcription corepressor activity; P:signal transduction; F:protein homodimerization activity; P:negative regulation of transcription, DNA-dependent	IPR000717; IPR011990; IPR011991; IPR013143; PTHR10678 (PANTHER), SSF46785 (SUPERFAMILY)	cop9 signalosome complex subunit [Source:VB External Description;Acc:AAEL005730]
AAEL007801-RA	3 histone mrna exonuclease 1	3.90265	down	0.00790307	0.00406773		3.18461	down	7.37582e-06	1.3885e-07		C:U12 snRNP; F:nucleic acid binding; F:exonuclease activity	IPR006055; IPR012337; IPR013520; G3DSA:3.30.420.10 (GENE3D), PTHR23044 (PANTHER), PTHR23044:SF9 (PANTHER)	exonuclease [Source:VB External Description;Acc:AAEL007801]
AAEL012992-RA	chromosome transmission fidelity protein 8	2.21622	down	0.00101898	0.000254483		2.11074	down	1.61082e-05	8.30338e-07		-	IPR018607	conserved hypothetical protein [Source:VB External Description;Acc:AAEL012992]
AAEL008279-RA	hypothetical protein AaeL_AAEL008279 [Aedes aegypti]	3.72424	down	0.000159244	4.702e-06		4.90226	down	0.000658165	0.000251362		C:intracellular; P:transport; F:transporter activity	SignalP-NN(euk) (SIGNALP), tmhmm (TMHMM)	conserved hypothetical protein [Source:VB External Description;Acc:AAEL008279]
AAEL006713-RA	splicing factor u2af 38 kda subunit	3.28453	down	0.000320912	3.05741e-05		3.27885	down	3.30324e-05	3.33454e-06		F:poly-pyrimidine tract binding; F:mRNA binding; F:zinc ion binding; C:precatalytic spliceosome; C:U2 snRNP; P:regulation of alternative nuclear mRNA splicing, via spliceosome; P:mitotic spindle organization; F:nucleotide binding	seg (SEG)	U2 snrnp auxiliary factor, small subunit [Source:VB External Description;Acc:AAEL006713]
AAEL003239-RA	pupal cuticle protein	21.6949	down	0.000580776	0.000101753		23.5622	down	7.22191e-05	1.19073e-05		F:structural constituent of cuticle	no IPS match	pupal cuticle protein, putative [Source:VB External Description;Acc:AAEL003239]
AAEL004643-RA	mitochondrial ribosomal protein l1	2.38365	down	0.000135787	2.81346e-06		2.64685	down	7.70518e-06	1.85937e-07		C:mitochondrial large ribosomal subunit; F:structural constituent of ribosome; F:RNA binding; P:translation; P:RNA processing	SignalP-NN(euk) (SIGNALP)	mitochondrial ribosomal protein L1 [Source:VB External Description;Acc:AAEL004643]
AAEL011116-RA	14-3-3 protein beta alpha	3.25917	down	0.00155937	0.000482122		3.58687	down	3.64339e-05	4.01394e-06		P:response to radiation; P:wing disc dorsal/ventral pattern formation; P:Ras protein signal transduction; F:SUMO binding; C:germline ring canal; P:germarium-derived oocyte fate determination; P:regulation of mitosis; P:oocyte microtubule cytoskeleton polarization; P:DNA damage checkpoint; F:protein domain specific binding; P:nonassociative learning; C:chromosome; P:mitotic cell cycle checkpoint; …	seg (SEG), tmhmm (TMHMM)	14-3-3 protein sigma, gamma, zeta, beta/alpha [Source:VB External Description;Acc:AAEL011116]
AAEL002848-RA	tubulin beta chain	2.36404	down	0.000111575	8.88551e-07		2.22528	down	0.000420746	0.000142889		P:axon guidance; C:microtubule; C:tubulin complex; P:response to light stimulus; P:heart development; P:protein polymerization; P:larval behavior; P:microtubule-based movement; F:GTPase activity; F:structural constituent of cytoskeleton; F:GTP binding	IPR000217; IPR002453; IPR003008; IPR008280; IPR017975; IPR018316; IPR023123	tubulin beta chain [Source:VB External Description;Acc:AAEL002848]
AAEL000527-RA	polynucleotide kinase- 3 -phosphatase	3.10955	down	0.00244609	0.000907551		2.72679	down	0.000616153	0.000231515		F:sequence-specific DNA binding; F:kinase activity; P:cell killing; F:ATP binding; F:transcription factor activity; P:regulation of transcription, DNA-dependent	IPR000253; IPR000418; IPR006549; IPR006550; IPR006551; IPR008984; IPR013954; IPR015636; IPR023214; G3DSA:3.40.50.300 (GENE3D), SSF52540 (SUPERFAMILY)	polynucleotide kinase- 3'-phosphatase [Source:VB External Description;Acc:AAEL000527]
AAEL005421-RA	hypothetical protein AaeL_AAEL005421 [Aedes aegypti]	2.93283	down	0.000300615	2.64079e-05		3.07985	down	0.00015897	3.83817e-05		-	no IPS match	hypothetical protein [Source:VB External Description;Acc:AAEL005421]
AAEL002198-RA	dc2 protein	3.44903	down	0.000208978	1.04552e-05		3.02483	down	2.46987e-05	2.04746e-06		-	IPR021149; PTHR13160 (PANTHER)	conserved hypothetical protein [Source:VB External Description;Acc:AAEL002198]
AAEL010546-RA	hsbp1-like protein	2.96296	down	0.00104192	0.000262571		2.42833	down	3.37998e-05	3.48033e-06		P:response to stress	IPR009643	heat shock factor binding protein, putative [Source:VB External Description;Acc:AAEL010546]
AAEL001824-RA	thioredoxin domain-containing protein 11	2.14446	down	0.000340803	3.59091e-05		2.27229	down	0.00017186	4.26882e-05		P:cell redox homeostasis	IPR012336; IPR013766; PTHR18929 (PANTHER), PTHR18929:SF32 (PANTHER)	hypothetical protein [Source:VB External Description;Acc:AAEL001824]
AAEL000270-RA	26s proteasome non-atpase regulatory subunit 7	3.08381	down	0.000200828	9.49763e-06		3.22244	down	1.28365e-05	5.44922e-07		P:mitotic spindle elongation; F:endopeptidase activity; C:dendrite; C:proteasome regulatory particle, lid subcomplex; P:cell proliferation; P:ubiquitin-dependent protein catabolic process	IPR000555; PTHR10540 (PANTHER), PTHR10540:SF7 (PANTHER)	26S proteasome regulatory subunit 7, psd7 [Source:VB External Description;Acc:AAEL000270]
AAEL002867-RA	phenylalanyl-trna synthetase alpha chain	2.29475	down	0.00021276	1.10785e-05		2.53972	down	4.24715e-05	5.08692e-06		F:phenylalanine-tRNA ligase activity; C:phenylalanine-tRNA ligase complex; F:ATP binding; P:phenylalanyl-tRNA aminoacylation; F:tRNA binding	IPR002319; IPR004529; IPR006195; G3DSA:3.30.930.10 (GENE3D), PTHR11538 (PANTHER), PTHR11538:SF15 (PANTHER), SSF55681 (SUPERFAMILY)	phenylalanyl-tRNA synthetase alpha chain [Source:VB External Description;Acc:AAEL002867]
AAEL011301-RA	hypothetical protein AaeL_AAEL011301 [Aedes aegypti]	4.20364	down	0.000546258	9.07793e-05		4.13281	down	0.000162043	3.93899e-05		-	IPR006578	conserved hypothetical protein [Source:VB External Description;Acc:AAEL011301]
AAEL005639-RA	mannosyl-oligosaccharide -alpha-mannosidase ib	12.0569	down	0.00773602	0.00395464		10.9528	down	6.48863e-05	1.02578e-05		F:mannosyl-oligosaccharide 1,2-alpha-mannosidase activity; F:calcium ion binding; P:determination of adult lifespan; P:ER-associated protein catabolic process; C:membrane	IPR001382; PTHR11742:SF10 (PANTHER)	conserved hypothetical protein [Source:VB External Description;Acc:AAEL005639]
AAEL009108-RA	protease m1 zinc metalloprotease	4.85189	down	0.00160748	0.000503647		2.18537	down	0.00911992	0.00567244		F:metallopeptidase activity; P:proteolysis; F:zinc ion binding	IPR001930; IPR014782; IPR015569; PS00142 (PROSITE), SSF55486 (SUPERFAMILY), SSF63737 (SUPERFAMILY)	protease m1 zinc metalloprotease [Source:VB External Description;Acc:AAEL009108]
AAEL004661-RA	chitooligosaccharidolytic beta-n-acetylglucosaminidase	2.97876	down	0.00372267	0.00158676		2.79087	down	9.72001e-05	1.88488e-05		C:plasma membrane; F:beta-N-acetylglucosaminidase activity; F:cation binding; P:chitin catabolic process	IPR001540; IPR013781; IPR015882; IPR015883; IPR017853; G3DSA:3.30.379.10 (GENE3D), PTHR22600 (PANTHER), SSF55545 (SUPERFAMILY)	beta-hexosaminidase [Source:VB External Description;Acc:AAEL004661]
AAEL004686-RA	ruvb1_aedae ame: full= -like helicase 1 ame: full=pontin	3.29236	down	7.36179e-05	2.90585e-07		3.41969	down	5.80236e-05	8.50377e-06		C:Ino80 complex; P:chromatin modification; F:DNA helicase activity; P:auxin biosynthetic process; F:beta-catenin binding; P:cell cycle; P:regulation of transcription; P:cell division; F:ATP binding; P:regulation of Wnt receptor signaling pathway; F:TATA-binding protein binding; P:regulation of cell proliferation; F:transcription coactivator activity	IPR003593; IPR010339; IPR016027; G3DSA:1.10.8.60 (GENE3D), G3DSA:3.40.50.300 (GENE3D), PTHR11093 (PANTHER), SSF52540 (SUPERFAMILY)	RuvB-like helicase 1 (EC 3.6.4.12)(Pontin) [Source:VB External Description;Acc:AAEL004686]
AAEL014959-RA	heterogeneous nuclear ribonucleoprotein k	3.86161	down	0.000240526	1.46394e-05		4.01042	down	6.65652e-06	1.18581e-07		F:mRNA binding; P:imaginal disc growth; P:regulation of alternative nuclear mRNA splicing, via spliceosome; P:cell fate commitment; C:chromatin; F:transcription factor binding; C:ribonucleoprotein complex; P:appendage morphogenesis; C:omega speckle; P:cell proliferation; C:cytoplasm	IPR004087; IPR004088; IPR018111; G3DSA:3.30.1370.10 (GENE3D), PTHR10288 (PANTHER), PTHR10288:SF38 (PANTHER), SSF54791 (SUPERFAMILY)	heterogeneous nuclear ribonucleoprotein k [Source:VB External Description;Acc:AAEL014959]
AAEL008367-RA	fk506-binding protein 2	6.53792	down	0.000657731	0.000125712		6.06315	down	9.96702e-05	1.96676e-05		C:endoplasmic reticulum membrane; P:protein folding; F:FK506 binding; F:protein binding; F:peptidyl-prolyl cis-trans isomerase activity	IPR001179; IPR023566; G3DSA:3.10.50.40 (GENE3D), SignalP-NN(euk) (SIGNALP), tmhmm (TMHMM), SSF54534 (SUPERFAMILY)	fk506-binding protein [Source:VB External Description;Acc:AAEL008367]
AAEL005539-RA	hypothetical protein AaeL_AAEL005539 [Aedes aegypti]	4.44744	down	0.000416428	5.39104e-05		4.84213	down	6.52205e-05	1.03837e-05		P:lipid catabolic process; F:hydrolase activity	PTHR21818 (PANTHER)	conserved hypothetical protein [Source:VB External Description;Acc:AAEL005539]
AAEL008613-RB	isoform a	2.60142	down	0.000411405	5.28243e-05		2.45057	down	1.48779e-05	7.27449e-07		-	IPR002816; PTHR21530 (PANTHER)	TraB, putative [Source:VB External Description;Acc:AAEL008613]
AAEL003863-RA	histone h4	3.12242	down	0.00974361	0.00528629		4.19079	down	0.00046315	0.000162205		C:nucleosome; P:negative regulation of megakaryocyte differentiation; F:DNA binding; F:protein binding; P:nucleosome assembly; C:nucleoplasm; P:phosphoinositide-mediated signaling	IPR002659; PTHR11214:SF3 (PANTHER), seg (SEG)	histone H4 [Source:VB External Description;Acc:AAEL003863]
AAEL010376-RA	protein shq1 homolog	2.3898	down	0.00240984	0.000887819		2.22312	down	0.00122315	0.000540413		P:biological_process; C:cellular_component	IPR007009; PTHR12967 (PANTHER)	conserved hypothetical protein [Source:VB External Description;Acc:AAEL010376]
AAEL005054-RA	pap-inositol- -phosphatase	2.95062	down	0.00416672	0.0018276		3.00643	down	0.000820367	0.000330323		F:inositol or phosphatidylinositol phosphatase activity	IPR000760; IPR020550; IPR020583; G3DSA:3.30.540.10 (GENE3D), G3DSA:3.40.190.80 (GENE3D), PTHR20854:SF7 (PANTHER), SSF56655 (SUPERFAMILY)	pap-inositol-1,4-phosphatase [Source:VB External Description;Acc:AAEL005054]
AAEL007713-RA	viral iap-associated factor	3.42594	down	0.00121903	0.000333508		3.59903	down	9.66278e-05	1.86541e-05		C:cytoplasm; F:protein binding; P:regulation of caspase activity	no IPS match	viral IAP-associated factor, putative [Source:VB External Description;Acc:AAEL007713]
AAEL008160-RA	fatty acid synthase	2.43789	down	0.000528959	8.50922e-05		3.68298	down	3.23865e-05	3.19808e-06		F:hydrolase activity, acting on ester bonds; P:oxidation reduction; F:acyl carrier activity; F:oxidoreductase activity; P:biosynthetic process; F:cofactor binding; F:zinc ion binding; F:transferase activity	IPR000794; IPR001031; IPR001227; IPR006163; IPR009081; IPR011032; IPR013149; IPR013968; IPR014030; IPR014031; IPR014043; IPR016035; IPR016036; IPR016038; IPR016039; IPR016040; IPR018201; IPR020842; IPR020843; G3DSA:3.40.50.1820 (GENE3D), G3DSA:3.90.180.10 (GENE3D), PTHR11712:SF5 (PANTHER), SSF51735 (SUPERFAMILY), SSF53474 (SUPERFAMILY)	fatty acid synthase [Source:VB External Description;Acc:AAEL008160]
AAEL002115-RA	hypothetical protein AaeL_AAEL002115 [Aedes aegypti]	2.41787	down	0.00604657	0.00292401		2.41562	down	0.000787764	0.000314907		C:nucleus; F:DNA binding; F:zinc ion binding	IPR007087; IPR012934; IPR015880; IPR017956; SSF57716 (SUPERFAMILY)	hypothetical protein [Source:VB External Description;Acc:AAEL002115]
AAEL001293-RA	cellular retinaldehyde-binding protein	3.17711	down	0.00104283	0.00026307		2.72318	down	5.55241e-05	7.82177e-06		C:intracellular; P:transport; F:transporter activity	IPR001071; IPR001251; IPR011074; G3DSA:1.10.8.20 (GENE3D), PTHR10174 (PANTHER), PTHR10174:SF23 (PANTHER)	conserved hypothetical protein [Source:VB External Description;Acc:AAEL001293]
AAEL013229-RA	tubulin alpha-1 chain	2.10207	down	0.000235733	1.37188e-05		2.15713	down	2.12024e-05	1.45834e-06		C:microtubule; C:tubulin complex; P:mitotic spindle organization; P:protein polymerization; P:mitotic cell cycle spindle assembly checkpoint; P:microtubule-based movement; P:antimicrobial humoral response; F:GTPase activity; F:structural constituent of cytoskeleton; C:spindle; F:GTP binding	IPR000217; IPR002452; IPR003008; IPR008280; IPR017975; IPR018316; IPR023123; coil (COIL), seg (SEG)	tubulin alpha chain [Source:VB External Description;Acc:AAEL013229]
AAEL000809-RA	agap002751 protein	2.38594	down	0.00225865	0.000808874		2.09084	down	0.00115062	0.000499206		-	G3DSA:3.80.10.10 (GENE3D), PTHR25480 (PANTHER), PTHR25480:SF125 (PANTHER), SSF52047 (SUPERFAMILY)	conserved hypothetical protein [Source:VB External Description;Acc:AAEL000809]
AAEL000722-RB	cg4186 cg4186-pa	2.42611	down	0.00243209	0.000897509		2.26478	down	2.04101e-05	1.33833e-06		F:cytochrome-c oxidase activity; C:mitochondrion	IPR003213; IPR009069; PTHR13626 (PANTHER), PTHR13626:SF2 (PANTHER)	conserved hypothetical protein [Source:VB External Description;Acc:AAEL000722]
AAEL011248-RA	innexin inx3	2.67666	down	0.00626706	0.00305598		3.08058	down	0.00492423	0.00281083		C:integral to membrane; F:gap junction channel activity; C:gap junction	IPR000990	innexin [Source:VB External Description;Acc:AAEL011248]
AAEL008302-RA	glutamine-dependent nad(+) synthetase	3.79894	down	0.00207604	0.000721349		3.38217	down	0.00171559	0.000813037		F:hydrolase activity, acting on carbon-nitrogen (but not peptide) bonds; F:ATP binding; F:NAD+ synthase (glutamine-hydrolyzing) activity; P:NAD biosynthetic process	IPR003010; IPR003694; IPR014445; IPR014729; IPR022310; PTHR23090 (PANTHER), SSF52402 (SUPERFAMILY)	glutamine-dependent NAD(+) synthetase [Source:VB External Description;Acc:AAEL008302]
AAEL002986-RA	isoform a	2.35922	down	0.000634162	0.000117555		2.16724	down	0.000290303	8.77201e-05		P:nuclear mRNA splicing, via spliceosome; F:nucleotide binding; F:mRNA binding	IPR000504; IPR006569; IPR006903; IPR008942; IPR012677; PTHR14124 (PANTHER), SSF54928 (SUPERFAMILY)	conserved hypothetical protein [Source:VB External Description;Acc:AAEL002986]
AAEL012017-RA	hypothetical protein AaeL_AAEL012017 [Aedes aegypti]	6.01407	down	0.00105513	0.000268112		5.55262	down	1.39658e-05	6.26389e-07		-	no IPS match	hypothetical protein [Source:VB External Description;Acc:AAEL012017]
AAEL000593-RA	mitochondrial 18 kda protein	2.02451	down	0.000634695	0.000117965		2.06537	down	6.00164e-05	9.01573e-06		F:zinc ion binding; F:carbonate dehydratase activity; P:carbon utilization	IPR001765; IPR019560	mitochondrial 18 kda protein (mtp18) [Source:VB External Description;Acc:AAEL000593]
AAEL009440-RA	isoform a	2.09164	down	0.00345814	0.00144566		2.28926	down	0.000267506	7.79367e-05		F:molecular_function; P:biological_process	no IPS match	conserved hypothetical protein [Source:VB External Description;Acc:AAEL009440]
AAEL000549-RA	fibulin 1 and	2.83612	down	0.000390854	4.75364e-05		2.28844	down	2.05712e-05	1.38007e-06		F:calcium ion binding	IPR000152; IPR000742; IPR001881; IPR006210; IPR013032; IPR013091; IPR018097; G3DSA:2.10.25.10 (GENE3D), PTHR24034 (PANTHER), PTHR24034:SF227 (PANTHER), PF12662 (PFAM), SSF57196 (SUPERFAMILY)	fibulin 1 and [Source:VB External Description;Acc:AAEL000549]
AAEL010042-RA	pentatricopeptide repeat domain 3	2.36226	down	0.000187885	8.33906e-06		2.72339	down	1.10609e-05	4.0632e-07		F:molecular_function; P:biological_process	IPR002885; PTHR16276 (PANTHER)	conserved hypothetical protein [Source:VB External Description;Acc:AAEL010042]
AAEL010245-RE	chloride	3.1817	down	0.000380637	4.44842e-05		3.22222	down	2.62005e-05	2.25096e-06		P:chloride transport; P:cell volume homeostasis	PTHR21399 (PANTHER), PF03517 (PFAM)	chloride channel, putative [Source:VB External Description;Acc:AAEL010245]
AAEL013188-RA	upf0568 protein c14orf166-like protein	3.01514	down	0.000182405	7.46427e-06		3.2738	down	4.87807e-06	6.48439e-08		-	IPR019265; PTHR15924:SF9 (PANTHER), seg (SEG)	cle7 [Source:VB External Description;Acc:AAEL013188]
AAEL006059-RA	hypothetical conserved protein	3.18264	down	0.000257417	1.86077e-05		2.85182	down	0.000184882	4.73007e-05		-	no IPS match	conserved hypothetical protein [Source:VB External Description;Acc:AAEL006059]
AAEL011301-RB	hypothetical protein AaeL_AAEL011301 [Aedes aegypti]	4.24858	down	0.0017058	0.000545264		4.22732	down	0.000124027	2.7109e-05		-	IPR006578	conserved hypothetical protein [Source:VB External Description;Acc:AAEL011301]
AAEL001649-RA	leucine aminopeptidase	2.39279	down	0.000260007	2.00151e-05		2.33792	down	7.95535e-06	2.19111e-07		C:cytoplasm; P:proteolysis; F:aminopeptidase activity	IPR000819; IPR011356; G3DSA:3.40.50.10590 (GENE3D), G3DSA:3.40.630.10 (GENE3D), PTHR11963 (PANTHER), PTHR11963:SF4 (PANTHER), SSF53187 (SUPERFAMILY)	leucine aminopeptidase [Source:VB External Description;Acc:AAEL001649]
AAEL015489-RA	rna and export factor binding protein 2-	3.26468	down	0.000652239	0.000124023		3.06776	down	2.23673e-05	1.62209e-06		F:nucleic acid binding; F:nucleotide binding	IPR000504; IPR012677; SSF54928 (SUPERFAMILY)	conserved hypothetical protein [Source:VB External Description;Acc:AAEL015489]
AAEL003230-RA	ubiquitin-like domain-containing ctd phosphatase 1	2.79768	down	0.000258792	1.90225e-05		2.62464	down	6.19581e-06	1.01938e-07		F:phosphoprotein phosphatase activity; C:nucleus	IPR000626; IPR004274; IPR011943; IPR019955; IPR023214; G3DSA:3.10.20.90 (GENE3D), PTHR13730 (PANTHER), SSF54236 (SUPERFAMILY)	conserved hypothetical protein [Source:VB External Description;Acc:AAEL003230]
AAEL003001-RA	wds	3.08376	down	0.000155813	4.50526e-06		3.10993	down	1.05463e-05	3.6644e-07		-	IPR001680; IPR011046; IPR015943; IPR017986; IPR019775; IPR019781; IPR019782; IPR020472; PTHR22847 (PANTHER), PTHR22847:SF117 (PANTHER)	WD-repeat protein [Source:VB External Description;Acc:AAEL003001]
AAEL007283-RA	acetyl-coa synthetase	6.15378	down	0.000259335	1.95862e-05		5.49985	down	0.000238617	6.6258e-05		F:catalytic activity; P:metabolic process	IPR000873; G3DSA:2.30.38.10 (GENE3D), G3DSA:3.30.300.30 (GENE3D), G3DSA:3.40.50.980 (GENE3D), PTHR24095 (PANTHER), PTHR24095:SF74 (PANTHER), PF11930 (PFAM), SSF56801 (SUPERFAMILY)	acetyl-coa synthetase [Source:VB External Description;Acc:AAEL007283]
AAEL006066-RA	peptidyl-trna hydrolase mitochondrial	2.11245	down	0.0014665	0.000443227		2.02297	down	0.000115046	2.439e-05		P:translation; F:aminoacyl-tRNA hydrolase activity; C:mitochondrion	IPR002833; IPR023476; PTHR12649 (PANTHER), PTHR12649:SF6 (PANTHER)	peptidyl-tRNA hydrolase [Source:VB External Description;Acc:AAEL006066]
AAEL010030-RA	isoform a	2.32844	down	0.00297622	0.00119103		2.76078	down	0.000530182	0.000190973		-	no IPS match	conserved hypothetical protein [Source:VB External Description;Acc:AAEL010030]
AAEL007647-RA	rwd domain-containing protein 1	2.25618	down	0.00327897	0.00135706		2.24881	down	0.000261248	7.56843e-05		-	IPR006575; IPR016135; PTHR12292 (PANTHER)	conserved hypothetical protein [Source:VB External Description;Acc:AAEL007647]
AAEL010248-RA	fibrillarin	2.64938	down	0.000658673	0.000126295		3.2656	down	2.26794e-05	1.66407e-06		C:dense fibrillar component; F:mRNA binding; C:Cajal body; C:small nucleolar ribonucleoprotein complex; P:rRNA processing; F:methyltransferase activity; P:tRNA processing	IPR000692; IPR020813; G3DSA:3.30.200.20 (GENE3D), G3DSA:3.40.50.150 (GENE3D), SSF53335 (SUPERFAMILY)	fibrillarin [Source:VB External Description;Acc:AAEL010248]
AAEL014556-RB	2-oxo-4-hydroxy-4-carboxy-5-ureidoimidazoline decarboxylase	2.82283	down	0.000872493	0.000199407		2.15354	down	0.00207769	0.00101981		P:allantoin biosynthetic process	IPR017580; IPR018020; PTHR10395 (PANTHER), PTHR10395:SF6 (PANTHER)	conserved hypothetical protein [Source:VB External Description;Acc:AAEL014556]
AAEL013782-RA	hypothetical protein AaeL_AAEL013782 [Aedes aegypti]	3.19554	down	0.00895162	0.00474561		2.45269	down	0.00181606	0.000871435		F:molecular_function; P:biological_process	seg (SEG)	conserved hypothetical protein [Source:VB External Description;Acc:AAEL013782]
AAEL000574-RB	thiol-disulfide isomerase	2.04093	down	0.000701475	0.000139917		2.38675	down	0.00168136	0.00079275		P:cell redox homeostasis; C:integral to membrane; F:isomerase activity	IPR012336; IPR013766; IPR017937; PTHR18929 (PANTHER)	conserved hypothetical protein [Source:VB External Description;Acc:AAEL000574]
AAEL009335-RA	adhesion regulating molecule 1 (110 kda cell membrane glycoprotein)	3.91602	down	0.00267241	0.00101991		7.58066	down	5.06342e-05	6.76788e-06		C:cytoplasm; C:proteasome complex; C:nucleus; P:proteasome assembly; F:proteasome activator activity	IPR006773; seg (SEG)	adhesion regulating molecule 1 (110 kda cell membrane glycoprotein) [Source:VB External Description;Acc:AAEL009335]
AAEL006109-RA	odorant-binding protein	4.99846	down	0.000297999	2.59441e-05		4.20732	down	0.00108826	0.000465551		F:odorant binding; P:transport	seg (SEG)	conserved hypothetical protein [Source:VB External Description;Acc:AAEL006109]
AAEL001897-RA	hypothetical protein AaeL_AAEL001897 [Aedes aegypti]	7.91989	down	0.0011713	0.000312988		22.4907	down	7.17493e-05	1.18117e-05		-	no IPS match	conserved hypothetical protein [Source:VB External Description;Acc:AAEL001897]
AAEL012426-RA	cytochrome c oxidase assembly protein cox15	2.81293	down	0.000588518	0.00010448		2.88618	down	5.63206e-05	8.0336e-06		C:membrane; P:protein complex assembly; F:catalytic activity	IPR003780; IPR009003; PTHR23289 (PANTHER)	cytochrome c oxidase assembly protein cox15 [Source:VB External Description;Acc:AAEL012426]
AAEL012306-RA	nedd8-activating enzyme e1 catalytic subunit	2.27749	down	0.00139242	0.000409093		2.47726	down	0.000108939	2.23658e-05		F:ATP binding; F:small protein activating enzyme activity; F:acid-amino acid ligase activity; P:protein neddylation	IPR000127; IPR000594; IPR009036; IPR014929; IPR016040; IPR018074; IPR019572; IPR023318; PTHR10953 (PANTHER), PTHR10953:SF6 (PANTHER)	ubiquitin-activating enzyme E1c [Source:VB External Description;Acc:AAEL012306]
AAEL001952-RA	28 kda heat- and acid-stable phosphoprotein	3.5728	down	0.00017517	6.41069e-06		3.64849	down	2.19347e-06	6.17067e-09		F:molecular_function; C:cellular_component; F:kinase activity	IPR019380; PTHR22055 (PANTHER)	28 kDa heat- and acid-stable phosphoprotein (PDGF-associated protein), putative [Source:VB External Description;Acc:AAEL001952]
AAEL006052-RA	hypothetical protein AaeL_AAEL006052 [Aedes aegypti]	3.87923	down	0.000872493	0.00019947		2.76375	down	0.000103111	2.06742e-05		F:nucleic acid binding	seg (SEG), SignalP-NN(euk) (SIGNALP), tmhmm (TMHMM)	hypothetical protein [Source:VB External Description;Acc:AAEL006052]
AAEL003287-RB	arsenite-resistance protein	2.77902	down	0.000425619	5.65384e-05		3.03762	down	3.4569e-05	3.62942e-06		P:conversion of ds siRNA to ss siRNA involved in RNA interference; C:precatalytic spliceosome; P:primary microRNA processing; P:response to arsenic; P:negative regulation of viral genome replication; P:nuclear mRNA splicing, via spliceosome; C:catalytic step 2 spliceosome; C:nucleoplasm	IPR007042; IPR021933; coil (COIL), PTHR13165 (PANTHER), seg (SEG), SSF54928 (SUPERFAMILY)	Serrate RNA effector molecule homolog (Arsenite-resistance protein 2 homolog) [Source:VB External Description;Acc:AAEL003287]
AAEL015084-RA	transmembrane protein 165	2.47512	down	0.000297017	2.56551e-05		2.58685	down	1.73607e-05	9.55965e-07		C:integral to membrane	IPR001727	hypothetical protein [Source:VB External Description;Acc:AAEL015084]
AAEL005546-RA	hypothetical protein AaeL_AAEL003120 [Aedes aegypti]	2.25149	down	0.00215282	0.000758792		4.33493	down	5.80583e-05	8.51619e-06		C:extracellular region; F:chitin binding; P:chitin metabolic process	IPR002557	conserved hypothetical protein [Source:VB External Description;Acc:AAEL005546]
AAEL008794-RA	dna-directed rna polymerase iii subunit d	2.0132	down	0.000950314	0.000229836		2.07147	down	0.000128473	2.87299e-05		C:DNA-directed RNA polymerase III complex; P:transcription from RNA polymerase III promoter; F:DNA-directed RNA polymerase activity; F:DNA binding	IPR007811	conserved hypothetical protein [Source:VB External Description;Acc:AAEL008794]
AAEL002215-RA	bromodomain-containing protein 7	2.05344	down	0.000334598	3.46348e-05		2.16509	down	1.27981e-05	5.40059e-07		F:DNA binding	IPR001487; IPR021900; PTHR22881 (PANTHER), PTHR22881:SF3 (PANTHER)	conserved hypothetical protein [Source:VB External Description;Acc:AAEL002215]
AAEL012454-RA	mitochondrial atp synthase f chain	2.17698	down	0.00318276	0.00130828		2.05676	down	0.000333582	0.000104858		-	seg (SEG), SignalP-NN(euk) (SIGNALP)	conserved hypothetical protein [Source:VB External Description;Acc:AAEL012454]
AAEL010023-RA	mitochondrial deoxynucleotide carrier	2.42787	down	0.00233874	0.000850727		2.45236	down	0.00175904	0.000837489		F:binding; C:mitochondrial envelope; P:transmembrane transport; C:integral to membrane	IPR018108; IPR023395; PTHR24089 (PANTHER), PTHR24089:SF106 (PANTHER), PS51257 (PROFILE)	conserved hypothetical protein [Source:VB External Description;Acc:AAEL010023]
AAEL000096-RA	hypothetical protein AaeL_AAEL000096 [Aedes aegypti]	5.40414	down	0.000926671	0.000220531		4.5624	down	0.000114007	2.40833e-05		-	no IPS match	conserved hypothetical protein [Source:VB External Description;Acc:AAEL000096]
AAEL005045-RA	atp-dependent bile acid permease	3.69511	down	0.000749365	0.000157365		3.38617	down	0.00022265	5.99452e-05		P:epithelial cell migration, open tracheal system; P:transmembrane transport; P:striated muscle contraction; F:structural constituent of muscle; P:auxin biosynthetic process; F:microfilament motor activity; C:integral to membrane; F:ATPase activity, coupled to transmembrane movement of substances; C:A band; F:ATP binding; C:striated muscle thick filament; F:protein homodimerization activity; P:sk…	IPR001140; IPR003439; IPR003593; IPR005292; IPR011527; IPR017871; IPR017940; G3DSA:1.20.1560.10 (GENE3D), G3DSA:3.40.50.300 (GENE3D), PTHR24223 (PANTHER), PTHR24223:SF137 (PANTHER), SSF52540 (SUPERFAMILY)	ATP-dependent bile acid permease [Source:VB External Description;Acc:AAEL005045]
AAEL009345-RA	l 37cc	4.07169	down	0.000107618	7.94211e-07		4.40751	down	3.76235e-06	2.99467e-08		C:membrane; P:instar larval or pupal development; C:mitochondrial envelope; C:lipid particle	IPR000163; IPR001107; SSF117892 (SUPERFAMILY)	prohibitin [Source:VB External Description;Acc:AAEL009345]
AAEL010385-RA	hypothetical protein AaeL_AAEL010377 [Aedes aegypti]	2.19809	down	0.0008887	0.000205026		2.17822	down	0.000156964	3.77492e-05		C:nuclear membrane	no IPS match	conserved hypothetical protein [Source:VB External Description;Acc:AAEL010385]
AAEL002699-RA	serpin 7 inhibitory serine protease inhibitor	4.07803	down	0.00516025	0.00240436		3.70532	down	0.000229565	6.27643e-05		F:serine-type endopeptidase inhibitor activity; F:peptidase activity	IPR000215; IPR023795; IPR023796; G3DSA:2.30.39.10 (GENE3D), G3DSA:3.30.497.10 (GENE3D), PTHR11461:SF22 (PANTHER)	serine protease inhibitor (serpin), likely cleavage at R/S. [Source:VB External Description;Acc:AAEL002699]
AAEL014649-RA	nuclear receptor coactivator 5	2.96225	down	0.00126228	0.00035199		2.87254	down	0.000168763	4.17056e-05		F:aminoacyl-tRNA ligase activity; F:nucleic acid binding; C:precatalytic spliceosome; F:ATP binding; P:translation; P:nuclear mRNA splicing, via spliceosome	SignalP-NN(euk) (SIGNALP)	hypothetical protein [Source:VB External Description;Acc:AAEL014649]
AAEL012278-RA	presequence mitochondrial	4.17074	down	0.000258792	1.91416e-05		5.38076	down	4.25916e-06	4.07875e-08		F:metalloendopeptidase activity; C:mitochondrial matrix; P:proteolysis; F:zinc ion binding	IPR007863; IPR011237; IPR011249; IPR013578; PTHR11851 (PANTHER), PTHR11851:SF68 (PANTHER)	metalloprotease [Source:VB External Description;Acc:AAEL012278]
AAEL000257-RA	hypothetical conserved protein	2.22319	down	0.00150478	0.000459598		2.37382	down	3.14272e-05	3.00512e-06		F:DNA binding; F:nuclease activity	IPR011335; IPR011604; IPR019080	hypothetical protein [Source:VB External Description;Acc:AAEL000257]
AAEL014281-RA	zinc finger protein 330	2.36018	down	0.000599924	0.000107607		2.30996	down	7.01756e-05	1.14462e-05		C:chromosome, centromeric region; C:nucleolus; C:midbody; F:zinc ion binding	IPR010531	conserved hypothetical protein [Source:VB External Description;Acc:AAEL014281]
AAEL000257-RB	hypothetical conserved protein	2.11757	down	0.00117805	0.000315802		2.25213	down	3.39034e-05	3.49529e-06		F:DNA binding; F:nuclease activity	IPR011335; IPR011604; IPR019080	hypothetical protein [Source:VB External Description;Acc:AAEL000257]
AAEL002906-RA	26s proteasome regulatory subunit rpn2	2.76293	down	0.000189099	8.57224e-06		3.34257	down	4.07091e-06	3.72897e-08		P:regulation of protein catabolic process; F:endopeptidase activity; C:proteasome regulatory particle, base subcomplex; F:SUMO binding; F:enzyme regulator activity; P:proteolysis; P:response to DNA damage stimulus	seg (SEG)	26S proteasome regulatory subunit rpn2 [Source:VB External Description;Acc:AAEL002906]
AAEL000983-RC	clathrin coat assembly protein ap19	3.11207	down	0.000257138	1.83411e-05		3.19568	down	9.64726e-05	1.85998e-05		F:protein transporter activity; P:synaptic vesicle coating; C:clathrin coat of trans-Golgi network vesicle; C:synaptic vesicle; C:clathrin adaptor complex; F:protein binding; P:intracellular protein transport	no IPS match	clathrin coat assembly protein ap19 [Source:VB External Description;Acc:AAEL000983]
AAEL004010-RB	splicing	3.70827	down	0.000150019	3.69441e-06		3.99146	down	2.25359e-06	7.40282e-09		C:cytosol; F:nucleotide binding; P:translational initiation; F:translation initiation factor activity; F:mRNA binding	IPR000504; IPR012677; PTHR23236 (PANTHER), SSF54928 (SUPERFAMILY)	splicing factor, putative [Source:VB External Description;Acc:AAEL004010]
AAEL003880-RA	hypothetical protein AaeL_AAEL003880 [Aedes aegypti]	2.00112	down	0.000448165	6.31546e-05		2.11613	down	0.000290303	8.77329e-05		-	no IPS match	hypothetical protein [Source:VB External Description;Acc:AAEL003880]
AAEL013491-RA	short-chain dehydrogenase	2.67089	down	0.000320912	3.09716e-05		2.49803	down	3.45521e-05	3.60581e-06		F:oxidoreductase activity; P:oxidation reduction; F:binding	IPR002198; IPR002347; IPR016040; PTHR24320 (PANTHER), PTHR24320:SF98 (PANTHER), seg (SEG), SignalP-NN(euk) (SIGNALP), tmhmm (TMHMM), SSF51735 (SUPERFAMILY)	short-chain dehydrogenase [Source:VB External Description;Acc:AAEL013491]
AAEL007176-RA	subito	3.49627	down	0.000853126	0.000192324		3.31756	down	6.97604e-06	1.2722e-07		F:microtubule motor activity; P:female meiosis chromosome segregation; P:auxin biosynthetic process; P:meiotic spindle organization; P:spindle midzone assembly involved in meiosis; C:spindle microtubule; F:ATP binding; P:microtubule-based movement; P:mitosis; C:spindle midzone	no IPS match	rabkinesin-6 [Source:VB External Description;Acc:AAEL007176]
AAEL014142-RA	phosphatidylinositol synthase	3.17876	down	0.000267848	2.10002e-05		2.65246	down	0.00016653	4.09434e-05		C:membrane; F:phosphotransferase activity, for other substituted phosphate groups; P:phospholipid biosynthetic process	IPR000462; IPR014387; PTHR15362 (PANTHER)	phosphatidylinositol synthase [Source:VB External Description;Acc:AAEL014142]
AAEL001472-RA	ethanolaminephosphotransferase 1	2.89648	down	0.00271361	0.00104329		2.48769	down	0.000803286	0.000322532		C:membrane; F:phosphotransferase activity, for other substituted phosphate groups; P:phospholipid biosynthetic process	IPR000462; IPR014472; PTHR10414 (PANTHER), PTHR10414:SF18 (PANTHER)	phosphatidyltransferase [Source:VB External Description;Acc:AAEL001472]
AAEL007134-RA	hypothetical protein AaeL_AAEL007134 [Aedes aegypti]	3.38788	down	0.000166189	5.45682e-06		2.5718	down	0.00022275	6.00243e-05		P:proteolysis; F:serine-type endopeptidase activity; F:catalytic activity	seg (SEG)	hypothetical protein [Source:VB External Description;Acc:AAEL007134]
AAEL014818-RA	nucleotide exchange factor sil1	2.42527	down	0.000917965	0.000215467		2.42644	down	9.79349e-05	1.90797e-05		F:binding	IPR011989; IPR016024; PTHR19316 (PANTHER), PTHR19316:SF1 (PANTHER)	sil1 [Source:VB External Description;Acc:AAEL014818]
AAEL009051-RA	peroxiredoxin 6005	2.49217	down	0.000471867	6.92945e-05		2.229	down	5.66215e-05	8.11228e-06		P:hydrogen peroxide catabolic process; P:cell redox homeostasis; F:thioredoxin peroxidase activity; C:cytosol	IPR000866; IPR012336; IPR019479; G3DSA:3.30.1020.10 (GENE3D), PTHR10681 (PANTHER)	thioredoxin peroxidase [Source:VB External Description;Acc:AAEL009051]
AAEL008149-RA	coiled-coil-helix-coiled-coil-helix domain-containing protein 8	8.85108	down	0.00300721	0.00120775		6.75463	down	7.35102e-05	1.22502e-05		P:translation; F:aminoacyl-tRNA hydrolase activity	PTHR13639 (PANTHER)	conserved hypothetical protein [Source:VB External Description;Acc:AAEL008149]
AAEL001826-RA	odorant-binding protein 56d	25.3222	down	0.000129789	2.1883e-06		20.0263	down	2.69704e-05	2.37162e-06		F:odorant binding; P:transport	no IPS match	odorant-binding protein 56a, putative [Source:VB External Description;Acc:AAEL001826]
AAEL010217-RA	intersex	2.61506	down	0.000186691	8.2126e-06		2.56149	down	3.11746e-05	2.96582e-06		P:sex differentiation; P:positive regulation of transcription from RNA polymerase II promoter; F:RNA polymerase II transcription mediator activity; F:transcription factor binding; C:mediator complex; P:female somatic sex determination	IPR021018	Mediator of RNA polymerase II transcription subunit 29 (Mediator complex subunit 29)(Protein intersex) [Source:VB External Description;Acc:AAEL010217]
AAEL001251-RB	nsfl1 cofactor p47	2.09538	down	0.000112781	1.02388e-06		2.39843	down	2.38959e-05	1.90503e-06		F:protein disulfide isomerase activity; P:rhabdomere development; C:transcription factor complex; C:cell surface; C:endoplasmic reticulum	IPR001012; IPR012989; G3DSA:3.10.20.90 (GENE3D), PTHR23333 (PANTHER), PTHR23333:SF11 (PANTHER), SSF54236 (SUPERFAMILY)	nsfl1 cofactor P47 [Source:VB External Description;Acc:AAEL001251]
AAEL008621-RA	cg5363	5.81382	down	0.000428407	5.70544e-05		5.20789	down	1.20582e-05	4.7892e-07		P:meiotic G2/MI transition; F:protein binding; P:response to DNA damage stimulus; F:cyclin-dependent protein kinase activity; P:auxin biosynthetic process; P:male meiosis I; P:spermatogonial cell division; P:regulation of cell cycle; P:germarium-derived cystoblast division; P:phosphorylation of RNA polymerase II C-terminal domain; P:G1/S transition of mitotic cell cycle; C:nucleus; F:ATP binding;…	IPR000719; IPR002290; IPR008271; IPR011009; IPR017441; IPR017442; G3DSA:1.10.510.10 (GENE3D), G3DSA:3.30.200.20 (GENE3D), PTHR24056 (PANTHER), PTHR24056:SF123 (PANTHER)	cdk1 [Source:VB External Description;Acc:AAEL008621]
AAEL007291-RA	replication factor 14kd-	4.88026	down	0.000287612	2.43141e-05		4.65599	down	7.65617e-06	1.83072e-07		-	coil (COIL)	replication factor A, 14kD-subunit, putative [Source:VB External Description;Acc:AAEL007291]
AAEL010280-RA	microsomal triglyceride transfer protein large subunit	15.7334	down	7.36179e-05	1.59755e-07		12.329	down	7.65432e-06	1.73915e-07		F:lipid transporter activity; P:lipid transport	IPR001747; IPR011989; IPR015816; IPR015819; PTHR13024 (PANTHER), SSF48431 (SUPERFAMILY)	conserved hypothetical protein [Source:VB External Description;Acc:AAEL010280]
AAEL009382-RA	nucleolar protein 66	3.48883	down	0.0014665	0.000443333		3.48643	down	0.000181684	4.62761e-05		F:histone demethylase activity (H3-K36 specific); P:histone H3-K4 demethylation; F:histone demethylase activity (H3-K4 specific); P:oxidation reduction; F:oxidoreductase activity, acting on single donors with incorporation of molecular oxygen, incorporation of two atoms of oxygen; P:histone H3-K36 demethylation; P:negative regulation of transcription, DNA-dependent; F:iron ion binding; C:nucleus	IPR003347; IPR013109; IPR022777; SSF51197 (SUPERFAMILY)	lysine-specific demethylase NO66 (EC 1.14.11.27)(Nucleolar protein 66) [Source:VB External Description;Acc:AAEL009382]
AAEL010957-RA	serine collagenase 1	3.44513	down	0.000195689	9.11072e-06		6.81453	down	1.00366e-05	3.31027e-07		F:serine-type endopeptidase activity; P:proteolysis	IPR001254; IPR009003; G3DSA:2.40.10.10 (GENE3D), PTHR24273 (PANTHER), PTHR24273:SF178 (PANTHER)	serine collagenase 1 precursor, putative [Source:VB External Description;Acc:AAEL010957]
AAEL009603-RA	trna methyltransferase	2.20879	down	0.0011874	0.000321217		2.20879	down	0.00369771	0.00200513		P:cellular nitrogen compound metabolic process; P:primary metabolic process	IPR003402; G3DSA:3.40.50.150 (GENE3D), PTHR23245 (PANTHER), PTHR23245:SF25 (PANTHER), SSF53335 (SUPERFAMILY)	conserved hypothetical protein [Source:VB External Description;Acc:AAEL009603]
AAEL002329-RB	alpha- -mannosyl-glycoprotein beta- 2-n-acetylglucosaminyltransferase	2.5051	down	0.00629574	0.00307151		2.60743	down	0.000437801	0.00015034		P:determination of adult lifespan; P:protein amino acid N-linked glycosylation via asparagine; P:adult locomotory behavior; P:mushroom body development; C:Golgi membrane; F:alpha-1,3-mannosylglycoprotein 2-beta-N-acetylglucosaminyltransferase activity; F:aminoacyl-tRNA ligase activity	IPR004139; G3DSA:3.10.180.20 (GENE3D), G3DSA:3.90.550.10 (GENE3D), SSF53448 (SUPERFAMILY)	alpha-1,3-mannosyl-glycoprotein beta-1, 2-n-acetylglucosaminyltransferase [Source:VB External Description;Acc:AAEL002329]
AAEL002401-RA	proteasome subunit beta type	2.24254	down	0.000258792	1.93323e-05		2.31496	down	1.88519e-05	1.13359e-06		C:cytoplasm; C:proteasome core complex; P:response to DNA damage stimulus; C:nucleus; F:threonine-type endopeptidase activity; P:proteolysis involved in cellular protein catabolic process	IPR001353; IPR016050; IPR023333; G3DSA:3.60.20.10 (GENE3D), PTHR11599 (PANTHER), PTHR11599:SF6 (PANTHER), SSF56235 (SUPERFAMILY)	proteasome subunit beta type [Source:VB External Description;Acc:AAEL002401]
AAEL010473-RA	nad dependent epimerase dehydratase	4.50106	down	0.000613924	0.000111773		4.43193	down	1.10609e-05	4.09134e-07		P:cellular metabolic process; F:coenzyme binding; F:catalytic activity	IPR001509; IPR016040; PTHR10366 (PANTHER), PTHR10366:SF3 (PANTHER), SSF51735 (SUPERFAMILY)	NAD dependent epimerase/dehydratase [Source:VB External Description;Acc:AAEL010473]
AAEL006386-RA	mitochondrial 39s ribosomal protein l39	2.50904	down	0.000328366	3.31906e-05		2.86221	down	2.3654e-05	1.84121e-06		C:ribosome; F:nucleotide binding	IPR012675; IPR015552; IPR018163; G3DSA:3.30.54.20 (GENE3D), PTHR11451 (PANTHER)	mitochondrial 39S ribosomal protein L39 [Source:VB External Description;Acc:AAEL006386]
AAEL010334-RA	phosphatidylinositol transfer protein	5.62747	down	0.000842198	0.00018821		3.59777	down	4.59659e-05	5.89272e-06		C:intracellular; P:transport; F:transporter activity	IPR001071; IPR001251; IPR008273; IPR011074; G3DSA:1.10.8.20 (GENE3D), PTHR10174 (PANTHER), PTHR10174:SF75 (PANTHER)	conserved hypothetical protein [Source:VB External Description;Acc:AAEL010334]
AAEL004733-RA	26s proteasome non-atpase regulatory subunit 14	3.93384	down	0.00014397	3.28087e-06		4.4848	down	6.19581e-06	1.03329e-07		C:proteasome regulatory particle, lid subcomplex; P:cellular process; P:proteolysis; F:endopeptidase activity	IPR000555; G3DSA:3.40.140.10 (GENE3D), PTHR10410 (PANTHER), PTHR10410:SF5 (PANTHER), SSF102712 (SUPERFAMILY)	jun activation domain binding protein [Source:VB External Description;Acc:AAEL004733]
[truncated: 930 more rows]
